# Supplementary material for: Geographic potential of the world’s largest hornet, Vespa mandarinia Smith (Hymenoptera: Vespidae), worldwide and particularly in North America
Source: PeerJ. 2021 Jan 13;9:e10690. doi: 10.7717/peerj.10690 (PMC7811286; doi:10.7717/peerj.10690)
Supplement: Supplemental Information 15 — Results of each calibration process is represented. The number at the end of the name of the page represents the calibration replicate number. 50 km: distance thinned occurrences; PC: principal components as environmental predictors; RawVariables: raw variables as environmental predictors; CountryThinning: country-density thinned occurrences; pval_pROC: p-value from partial ROC analysis; AICc: Akaike Information Criteria corrected for small sample sizes; W_AICc: weight of AICc; N_parameters: number of parameters in the model; M: regularization multiplier; F: feature class; l: linear; q: quadratic; p: product; t: threshold; h: hinge. The variables included in the sets mentioned on this table can be found in Tables S1 and S2. [file peerj-09-10690-s015.xlsx]

## Sheet: 50km-PC_1
Model	Mean_AUC_ratio	pval_pROC	Omission_rate_at_5%	AICc	delta_AICc	W_AICc	N_parameters
M_0.1_F_lq_Set_1	2.02818	0	0.166667	879.831	26.4415	3.56469e-07	4
M_0.1_F_lq_Set_10	3.02032	0	0.208333	900.988	47.5979	9.07784e-12	6
M_0.1_F_lq_Set_11	1.87833	0	0.208333	864.963	11.5732	0.000603448	8
M_0.1_F_lq_Set_2	2.21829	0	0.208333	865.878	12.4885	0.000381849	4
M_0.1_F_lq_Set_3	2.028	0	0.25	901.294	47.9039	7.78999e-12	4
M_0.1_F_lq_Set_4	2.21414	0	0.0833333	898.784	45.3939	2.73261e-11	4
M_0.1_F_lq_Set_5	1.36039	0	0.291667	909.09	55.6998	1.58001e-13	4
M_0.1_F_lq_Set_6	3.36997	0	0.166667	918.477	65.0875	1.44594e-15	4
M_0.1_F_lq_Set_7	2.20239	0	0.208333	862.391	9.00077	0.00218392	6
M_0.1_F_lq_Set_8	1.40626	0	0.291667	883.627	30.2375	5.34254e-08	6
M_0.1_F_lq_Set_9	1.74869	0	0.25	868.326	14.9365	0.000112284	6
M_0.1_F_lp_Set_1	1.72941	0	0.0416667	924.445	71.0554	7.31564e-17	3
M_0.1_F_lp_Set_10	2.05631	0	0	906.794	53.4043	4.97894e-13	6
M_0.1_F_lp_Set_11	2.07278	0	0	899.818	46.4276	1.62969e-11	10
M_0.1_F_lp_Set_2	3.10943	0	0.0416667	911.322	57.9317	5.17634e-14	3
M_0.1_F_lp_Set_3	1.99992	0	0.125	927.456	74.0659	1.62377e-17	3
M_0.1_F_lp_Set_4	2.18284	0	0	908.169	54.7786	2.50447e-13	3
M_0.1_F_lp_Set_5	1.96223	0	0.0416667	923.459	70.0694	1.19772e-16	3
M_0.1_F_lp_Set_6	3.73306	0	0.166667	916.573	63.1834	3.74643e-15	3
M_0.1_F_lp_Set_7	2.18889	0	0	906.23	52.8401	6.60158e-13	6
M_0.1_F_lp_Set_8	1.99967	0	0.0416667	901.37	47.9798	7.49985e-12	6
M_0.1_F_lp_Set_9	3.1333	0	0.125	914.988	61.5984	8.2756e-15	6
M_0.1_F_q_Set_1	2.39124	0	0.25	926.973	73.5831	2.06715e-17	2
M_0.1_F_q_Set_10	2.31289	0	0.25	930.392	77.002	3.74068e-18	3
M_0.1_F_q_Set_11	3.34119	0	0.208333	917.727	64.3374	2.104e-15	4
M_0.1_F_q_Set_2	106.484	0	0.208333	919.245	65.8548	9.85214e-16	2
M_0.1_F_q_Set_3	2.51271	0	0.208333	926.082	72.6919	3.22767e-17	2
M_0.1_F_q_Set_4	2.21327	0	0.208333	930.121	76.7309	4.28372e-18	2
M_0.1_F_q_Set_5	2.14099	0	0.25	934.155	80.7649	5.69966e-19	2
M_0.1_F_q_Set_6	2.20444	0	0.333333	936.099	82.7091	2.15619e-19	2
M_0.1_F_q_Set_7	2.72894	0	0.25	915.526	62.1361	6.32481e-15	3
M_0.1_F_q_Set_8	2.4031	0	0.25	923.171	69.7806	1.3838e-16	3
M_0.1_F_q_Set_9	4.14425	0	0.25	921.019	67.6294	4.05686e-16	3
M_0.1_F_qp_Set_1	2.78833	0	0.208333	908.116	54.7263	2.57083e-13	3
M_0.1_F_qp_Set_10	2.43365	0	0.25	925.842	72.4523	3.6384e-17	6
M_0.1_F_qp_Set_11	1.99263	0	0.291667	883.619	30.2289	5.36533e-08	9
M_0.1_F_qp_Set_2	2.2949	0	0.208333	904.107	50.717	1.90837e-12	3
M_0.1_F_qp_Set_3	2.57733	0	0.208333	926.604	73.2141	2.48596e-17	3
M_0.1_F_qp_Set_4	2.17516	0	0.208333	932.075	78.685	1.61248e-18	3
M_0.1_F_qp_Set_5	2.12378	0	0.25	935.475	82.0846	2.94629e-19	3
M_0.1_F_qp_Set_6	2.32063	0	0.208333	935.726	82.3365	2.59765e-19	3
M_0.1_F_qp_Set_7	2.57728	0	0.25	886.474	33.0841	1.28707e-08	6
M_0.1_F_qp_Set_8	2.34445	0	0.166667	907.721	54.331	3.13259e-13	6
M_0.1_F_qp_Set_9	2.19101	0	0.208333	899.613	46.2227	1.80551e-11	5
M_0.1_F_lqp_Set_1	2.30187	0	0.125	865.308	11.9177	0.000507975	5
M_0.1_F_lqp_Set_10	1.68972	0	0.25	887.836	34.4465	6.5127e-09	9
M_0.1_F_lqp_Set_11	1.61317	0	0.25	859.675	6.28494	0.00849125	13
M_0.1_F_lqp_Set_2	2.03698	0	0.166667	864.78	11.3904	0.000661202	5
M_0.1_F_lqp_Set_3	2.10637	0	0.25	895.898	42.5076	1.15699e-10	4
M_0.1_F_lqp_Set_4	2.12043	0	0.125	901.259	47.8693	7.92574e-12	5
M_0.1_F_lqp_Set_5	1.58123	0	0.208333	892.792	39.402	5.46619e-10	5
M_0.1_F_lqp_Set_6	3.66369	0	0.208333	920.899	67.5091	4.30834e-16	5
M_0.1_F_lqp_Set_7	1.98932	0	0.208333	854.871	1.48119	0.093776	9
M_0.1_F_lqp_Set_8	1.54444	0	0.291667	861.161	7.77117	0.00403869	9
M_0.1_F_lqp_Set_9	1.58297	0	0.25	869.879	16.4895	5.1652e-05	8
M_0.1_F_lqpt_Set_1	3.28886	0	0.958333	NA	NA	NA	69
M_0.1_F_lqpt_Set_10	2.91174	0	0.875	NA	NA	NA	82
M_0.1_F_lqpt_Set_11	2.69717	0	1	NA	NA	NA	105
M_0.1_F_lqpt_Set_2	3.76462	0	0.958333	NA	NA	NA	71
M_0.1_F_lqpt_Set_3	1.9963	0	0.958333	NA	NA	NA	72
M_0.1_F_lqpt_Set_4	2.9541	0	0.958333	NA	NA	NA	64
M_0.1_F_lqpt_Set_5	3.59128	0	0.916667	NA	NA	NA	72
M_0.1_F_lqpt_Set_6	3.05267	0	0.833333	NA	NA	NA	62
M_0.1_F_lqpt_Set_7	2.18762	0	1	NA	NA	NA	93
M_0.1_F_lqpt_Set_8	1.98084	0	1	NA	NA	NA	93
M_0.1_F_lqpt_Set_9	1.95048	0	1	NA	NA	NA	90
M_0.1_F_lqpth_Set_1	2.27012	0	0.958333	NA	NA	NA	77
M_0.1_F_lqpth_Set_10	2.75457	0	0.916667	NA	NA	NA	91
M_0.1_F_lqpth_Set_11	2.57687	0	1	NA	NA	NA	114
M_0.1_F_lqpth_Set_2	2.01379	0	1	NA	NA	NA	78
M_0.1_F_lqpth_Set_3	1.76755	0	0.958333	NA	NA	NA	78
M_0.1_F_lqpth_Set_4	2.00813	0	0.958333	NA	NA	NA	73
M_0.1_F_lqpth_Set_5	1.95704	0	1	NA	NA	NA	72
M_0.1_F_lqpth_Set_6	2.60707	0	0.833333	NA	NA	NA	71
M_0.1_F_lqpth_Set_7	2.77491	0	1	NA	NA	NA	110
M_0.1_F_lqpth_Set_8	2.88504	0	1	NA	NA	NA	104
M_0.1_F_lqpth_Set_9	1.88239	0	1	NA	NA	NA	96
M_0.1_F_lqph_Set_1	2.06335	0	0.25	NA	NA	NA	90
M_0.1_F_lqph_Set_10	2.20322	0	0.333333	NA	NA	NA	117
M_0.1_F_lqph_Set_11	2.44302	0	0.458333	NA	NA	NA	151
M_0.1_F_lqph_Set_2	1.70003	0	0.25	NA	NA	NA	95
M_0.1_F_lqph_Set_3	1.70684	0	0.375	NA	NA	NA	116
M_0.1_F_lqph_Set_4	2.39613	0	0.25	NA	NA	NA	119
M_0.1_F_lqph_Set_5	2.07783	0	0.291667	NA	NA	NA	142
M_0.1_F_lqph_Set_6	3.26242	0	0.25	NA	NA	NA	136
M_0.1_F_lqph_Set_7	2.03137	0	0.416667	NA	NA	NA	116
M_0.1_F_lqph_Set_8	1.69426	0	0.416667	NA	NA	NA	116
M_0.1_F_lqph_Set_9	1.8667	0	0.333333	NA	NA	NA	142
M_0.25_F_lq_Set_1	1.98319	0	0.208333	879.854	26.464	3.52489e-07	4
M_0.25_F_lq_Set_10	2.92416	0	0.208333	901.025	47.6346	8.91264e-12	6
M_0.25_F_lq_Set_11	2.58596	0	0.208333	865.009	11.6188	0.000589857	8
M_0.25_F_lq_Set_2	2.162	0	0.208333	865.922	12.5321	0.000373613	4
M_0.25_F_lq_Set_3	2.03072	0	0.25	898.939	45.5487	2.52909e-11	3
M_0.25_F_lq_Set_4	2.14387	0	0.0833333	898.809	45.4189	2.69867e-11	4
M_0.25_F_lq_Set_5	1.32679	0	0.291667	909.108	55.7181	1.56565e-13	4
M_0.25_F_lq_Set_6	3.21529	0	0.166667	918.495	65.1051	1.43332e-15	4
M_0.25_F_lq_Set_7	2.15282	0	0.208333	862.436	9.04654	0.00213451	6
M_0.25_F_lq_Set_8	1.37212	0	0.291667	883.653	30.263	5.27481e-08	6
M_0.25_F_lq_Set_9	2.35193	0	0.25	868.367	14.9772	0.000110022	6
M_0.25_F_lp_Set_1	1.7311	0	0.0416667	924.46	71.0703	7.26127e-17	3
M_0.25_F_lp_Set_10	2.05874	0	0	904.29	50.9002	1.74141e-12	5
M_0.25_F_lp_Set_11	1.99662	0	0	900.291	46.9006	1.28647e-11	10
M_0.25_F_lp_Set_2	3.0083	0	0.0416667	911.379	57.9888	5.03055e-14	3
M_0.25_F_lp_Set_3	2.00033	0	0.125	927.52	74.1299	1.57259e-17	3
M_0.25_F_lp_Set_4	2.18864	0	0	908.224	54.8338	2.4363e-13	3
M_0.25_F_lp_Set_5	1.95538	0	0.0416667	923.52	70.1296	1.16218e-16	3
M_0.25_F_lp_Set_6	3.92427	0	0.166667	914.373	60.9828	1.12585e-14	2
M_0.25_F_lp_Set_7	2.14233	0	0	906.321	52.9311	6.30795e-13	6
M_0.25_F_lp_Set_8	1.99891	0	0.0416667	901.495	48.1049	7.04516e-12	6
M_0.25_F_lp_Set_9	3.06893	0	0.125	915.051	61.6611	8.0205e-15	6
M_0.25_F_q_Set_1	2.405	0	0.25	926.98	73.5897	2.06031e-17	2
M_0.25_F_q_Set_10	2.28508	0	0.25	930.404	77.0136	3.71916e-18	3
M_0.25_F_q_Set_11	3.32161	0	0.208333	917.738	64.3485	2.09236e-15	4
M_0.25_F_q_Set_2	95.0983	0	0.208333	919.251	65.8609	9.82222e-16	2
M_0.25_F_q_Set_3	2.50328	0	0.208333	926.091	72.7006	3.2136e-17	2
M_0.25_F_q_Set_4	2.21495	0	0.208333	930.132	76.7421	4.25981e-18	2
M_0.25_F_q_Set_5	2.12356	0	0.25	934.164	80.774	5.67371e-19	2
M_0.25_F_q_Set_6	2.25323	0	0.333333	936.107	82.7175	2.14712e-19	2
M_0.25_F_q_Set_7	2.71483	0	0.25	915.534	62.1444	6.29849e-15	3
M_0.25_F_q_Set_8	2.37245	0	0.25	923.181	69.7906	1.3769e-16	3
M_0.25_F_q_Set_9	4.0778	0	0.25	921.031	67.6408	4.03384e-16	3
M_0.25_F_qp_Set_1	2.67831	0	0.208333	908.363	54.9732	2.27226e-13	3
M_0.25_F_qp_Set_10	2.38057	0	0.291667	926.2	72.8105	3.04182e-17	6
M_0.25_F_qp_Set_11	1.98925	0	0.291667	881.462	28.0718	1.57767e-07	8
M_0.25_F_qp_Set_2	2.25874	0	0.208333	904.161	50.7711	1.85751e-12	3
M_0.25_F_qp_Set_3	2.42481	0	0.208333	926.643	73.2526	2.43848e-17	3
M_0.25_F_qp_Set_4	2.16061	0	0.208333	932.118	78.7282	1.57804e-18	3
M_0.25_F_qp_Set_5	2.09966	0	0.25	935.522	82.1325	2.87663e-19	3
M_0.25_F_qp_Set_6	2.23507	0	0.208333	935.753	82.363	2.56349e-19	3
M_0.25_F_qp_Set_7	2.515	0	0.25	884.32	30.9303	3.77825e-08	5
M_0.25_F_qp_Set_8	2.5635	0	0.166667	908.005	54.6149	2.71808e-13	6
M_0.25_F_qp_Set_9	2.78648	0	0.166667	902.397	49.0068	4.48793e-12	6
M_0.25_F_lqp_Set_1	2.18087	0	0.125	865.675	12.2855	0.000422642	5
M_0.25_F_lqp_Set_10	1.75663	0	0.25	888.623	35.2335	4.39416e-09	9
M_0.25_F_lqp_Set_11	1.59825	0	0.25	856.64	3.25048	0.0387165	12
M_0.25_F_lqp_Set_2	2.02575	0	0.166667	864.991	11.6007	0.000595211	5
M_0.25_F_lqp_Set_3	2.02938	0	0.25	898.684	45.2939	2.87261e-11	5
M_0.25_F_lqp_Set_4	2.06307	0	0.0416667	898.919	45.5288	2.55429e-11	4
M_0.25_F_lqp_Set_5	1.5414	0	0.25	893.324	39.9345	4.18855e-10	5
M_0.25_F_lqp_Set_6	3.26101	0	0.208333	918.576	65.1864	1.37623e-15	4
M_0.25_F_lqp_Set_7	1.99219	0	0.208333	855.644	2.25389	0.0637239	9
M_0.25_F_lqp_Set_8	1.97435	0	0.333333	861.851	8.46083	0.00286077	9
M_0.25_F_lqp_Set_9	2.12475	0	0.208333	867.304	13.9138	0.000187232	7
M_0.25_F_lqpt_Set_1	2.32593	0	0.208333	1456.45	603.061	2.19123e-132	42
M_0.25_F_lqpt_Set_10	2.008	0	0.416667	NA	NA	NA	65
M_0.25_F_lqpt_Set_11	3.11512	0	0.625	NA	NA	NA	79
M_0.25_F_lqpt_Set_2	2.10453	0	0.5	NA	NA	NA	52
M_0.25_F_lqpt_Set_3	2.01001	0	0.333333	2250.68	1397.29	7.5027e-305	45
M_0.25_F_lqpt_Set_4	1.98449	0	0.458333	1296.11	442.718	1.44125e-97	40
M_0.25_F_lqpt_Set_5	2.05753	0	0.291667	NA	NA	NA	48
M_0.25_F_lqpt_Set_6	4.01082	0	0.333333	3046.4	2193.01	0	46
M_0.25_F_lqpt_Set_7	1.64575	0	0.625	NA	NA	NA	68
M_0.25_F_lqpt_Set_8	2.35468	0	0.5	NA	NA	NA	58
M_0.25_F_lqpt_Set_9	2.37778	0	0.458333	NA	NA	NA	63
M_0.25_F_lqpth_Set_1	1.86544	0	0.458333	NA	NA	NA	51
M_0.25_F_lqpth_Set_10	2.19857	0	0.666667	NA	NA	NA	74
M_0.25_F_lqpth_Set_11	2.46118	0	0.708333	NA	NA	NA	86
M_0.25_F_lqpth_Set_2	2.11265	0	0.541667	NA	NA	NA	54
M_0.25_F_lqpth_Set_3	1.48397	0	0.375	NA	NA	NA	50
M_0.25_F_lqpth_Set_4	1.89873	0	0.5	NA	NA	NA	48
M_0.25_F_lqpth_Set_5	2.32768	0	0.333333	NA	NA	NA	51
M_0.25_F_lqpth_Set_6	3.03147	0	0.333333	NA	NA	NA	50
M_0.25_F_lqpth_Set_7	1.9326	0	0.708333	NA	NA	NA	72
M_0.25_F_lqpth_Set_8	1.65121	0	0.625	NA	NA	NA	66
M_0.25_F_lqpth_Set_9	1.82381	0	0.541667	NA	NA	NA	69
M_0.25_F_lqph_Set_1	1.89541	0	0.0833333	NA	NA	NA	63
M_0.25_F_lqph_Set_10	1.85348	0	0.291667	NA	NA	NA	90
M_0.25_F_lqph_Set_11	1.70416	0	0.375	NA	NA	NA	100
M_0.25_F_lqph_Set_2	2.07824	0	0.208333	1041.73	188.335	2.49613e-42	32
M_0.25_F_lqph_Set_3	2.07306	0	0.25	NA	NA	NA	75
M_0.25_F_lqph_Set_4	1.99087	0	0.0416667	NA	NA	NA	53
M_0.25_F_lqph_Set_5	1.8057	0	0.25	NA	NA	NA	99
M_0.25_F_lqph_Set_6	4.42232	0	0.208333	NA	NA	NA	103
M_0.25_F_lqph_Set_7	1.83798	0	0.208333	NA	NA	NA	82
M_0.25_F_lqph_Set_8	1.86171	0	0.291667	NA	NA	NA	87
M_0.25_F_lqph_Set_9	1.70694	0	0.291667	NA	NA	NA	96
M_0.5_F_lq_Set_1	1.96431	0	0.208333	879.932	26.5418	3.39048e-07	4
M_0.5_F_lq_Set_10	2.81518	0	0.208333	901.164	47.7742	8.31156e-12	6
M_0.5_F_lq_Set_11	2.51786	0	0.208333	862.285	8.8953	0.00230218	7
M_0.5_F_lq_Set_2	2.15308	0	0.208333	866.072	12.6822	0.000346597	4
M_0.5_F_lq_Set_3	2.0173	0	0.25	899.005	45.6153	2.44622e-11	3
M_0.5_F_lq_Set_4	2.08328	0	0.0416667	898.904	45.5138	2.57358e-11	4
M_0.5_F_lq_Set_5	1.32295	0	0.25	909.169	55.7795	1.51834e-13	4
M_0.5_F_lq_Set_6	3.07639	0	0.166667	918.565	65.1751	1.38399e-15	4
M_0.5_F_lq_Set_7	2.10309	0	0.208333	862.594	9.20415	0.00197276	6
M_0.5_F_lq_Set_8	2.12011	0	0.291667	883.74	30.3495	5.05136e-08	6
M_0.5_F_lq_Set_9	2.28487	0	0.25	865.908	12.5185	0.000376165	5
M_0.5_F_lp_Set_1	1.7309	0	0.0416667	924.496	71.1063	7.13178e-17	3
M_0.5_F_lp_Set_10	2.1102	0	0	902.02	48.6303	5.4173e-12	4
M_0.5_F_lp_Set_11	1.99759	0	0	898.422	45.0324	3.27394e-11	9
M_0.5_F_lp_Set_2	2.96491	0	0.0416667	911.589	58.199	4.52882e-14	3
M_0.5_F_lp_Set_3	1.99909	0	0.166667	927.733	74.3435	1.41331e-17	3
M_0.5_F_lp_Set_4	2.1984	0	0	908.414	55.0236	2.21564e-13	3
M_0.5_F_lp_Set_5	1.96925	0	0.0416667	923.717	70.3269	1.05303e-16	3
M_0.5_F_lp_Set_6	3.89832	0	0.0833333	914.429	61.0392	1.09455e-14	2
M_0.5_F_lp_Set_7	2.00675	0	0	906.653	53.2629	5.34355e-13	6
M_0.5_F_lp_Set_8	1.9907	0	0.0416667	901.907	48.5171	5.7329e-12	6
M_0.5_F_lp_Set_9	3.07556	0	0.125	910.165	56.7748	9.23092e-14	4
M_0.5_F_q_Set_1	2.29424	0	0.25	927.003	73.6132	2.03621e-17	2
M_0.5_F_q_Set_10	2.23668	0	0.25	930.436	77.0457	3.6598e-18	3
M_0.5_F_q_Set_11	3.14482	0	0.208333	917.774	64.3838	2.05577e-15	4
M_0.5_F_q_Set_2	89.082	0	0.208333	919.273	65.8827	9.71596e-16	2
M_0.5_F_q_Set_3	2.43638	0	0.208333	926.114	72.724	3.17617e-17	2
M_0.5_F_q_Set_4	2.17635	0	0.208333	930.165	76.7746	4.19122e-18	2
M_0.5_F_q_Set_5	2.10208	0	0.25	934.192	80.802	5.59509e-19	2
M_0.5_F_q_Set_6	3.18745	0	0.291667	936.126	82.7355	2.12782e-19	2
M_0.5_F_q_Set_7	2.63804	0	0.25	915.565	62.1746	6.20408e-15	3
M_0.5_F_q_Set_8	2.30414	0	0.25	923.211	69.8207	1.35628e-16	3
M_0.5_F_q_Set_9	3.72907	0	0.25	921.061	67.6706	3.97414e-16	3
M_0.5_F_qp_Set_1	2.6374	0	0.208333	909.033	55.6435	1.62514e-13	3
M_0.5_F_qp_Set_10	2.27315	0	0.25	927.309	73.9194	1.74717e-17	6
M_0.5_F_qp_Set_11	1.99534	0	0.291667	882.665	29.2754	8.64269e-08	8
M_0.5_F_qp_Set_2	2.13783	0	0.208333	904.342	50.9519	1.69695e-12	3
M_0.5_F_qp_Set_3	2.33806	0	0.208333	926.773	73.383	2.2846e-17	3
M_0.5_F_qp_Set_4	2.11176	0	0.208333	932.253	78.8629	1.47528e-18	3
M_0.5_F_qp_Set_5	2.07586	0	0.25	935.689	82.2986	2.64734e-19	3
M_0.5_F_qp_Set_6	2.19101	0	0.208333	935.816	82.4257	2.48438e-19	3
M_0.5_F_qp_Set_7	2.3549	0	0.25	885.164	31.7742	2.47774e-08	5
M_0.5_F_qp_Set_8	2.41955	0	0.166667	908.801	55.4113	1.82526e-13	6
M_0.5_F_qp_Set_9	2.64057	0	0.166667	902.958	49.5683	3.38933e-12	6
M_0.5_F_lqp_Set_1	2.04946	0	0.166667	866.68	13.2896	0.000255822	5
M_0.5_F_lqp_Set_10	2.24887	0	0.25	890.953	37.5628	1.37111e-09	9
M_0.5_F_lqp_Set_11	1.98591	0	0.25	855.084	1.69397	0.0843117	11
M_0.5_F_lqp_Set_2	2.03153	0	0.166667	865.682	12.2918	0.000421312	5
M_0.5_F_lqp_Set_3	2.00145	0	0.208333	899.651	46.2609	1.77138e-11	5
M_0.5_F_lqp_Set_4	2.03405	0	0.0416667	899.328	45.9376	2.08213e-11	4
M_0.5_F_lqp_Set_5	2.15849	0	0.25	894.897	41.5071	1.90798e-10	5
M_0.5_F_lqp_Set_6	3.03901	0	0.166667	918.881	65.4909	1.18185e-15	4
M_0.5_F_lqp_Set_7	2.01589	0	0.208333	854.233	0.843027	0.129023	8
M_0.5_F_lqp_Set_8	1.97697	0	0.333333	860.774	7.38378	0.00490187	8
M_0.5_F_lqp_Set_9	2.07127	0	0.208333	865.367	11.9775	0.000493006	6
M_0.5_F_lqpt_Set_1	1.94235	0	0.25	867.585	14.1949	0.000162687	17
M_0.5_F_lqpt_Set_10	1.86118	0	0.291667	961.214	107.824	7.5857e-25	28
M_0.5_F_lqpt_Set_11	2.00746	0	0.291667	997.009	143.619	1.27985e-32	33
M_0.5_F_lqpt_Set_2	2.01833	0	0.166667	884.006	30.6161	4.4211e-08	16
M_0.5_F_lqpt_Set_3	1.90233	0	0.25	927.033	73.6435	2.00559e-17	22
M_0.5_F_lqpt_Set_4	2.07259	0	0.166667	913.923	60.5326	1.41006e-14	16
M_0.5_F_lqpt_Set_5	1.6677	0	0.25	921.824	68.4339	2.71329e-16	22
M_0.5_F_lqpt_Set_6	3.78707	0	0.208333	924.314	70.9241	7.81175e-17	16
M_0.5_F_lqpt_Set_7	2.13416	0	0.166667	871.257	17.8672	2.59372e-05	20
M_0.5_F_lqpt_Set_8	1.97502	0	0.291667	912.793	59.4032	2.48017e-14	27
M_0.5_F_lqpt_Set_9	2.05656	0	0.333333	900.76	47.3704	1.01713e-11	23
M_0.5_F_lqpth_Set_1	2.08857	0	0.208333	883.933	30.5433	4.58492e-08	21
M_0.5_F_lqpth_Set_10	1.87631	0	0.25	1304.28	450.894	2.41764e-99	40
M_0.5_F_lqpth_Set_11	1.65784	0	0.333333	NA	NA	NA	49
M_0.5_F_lqpth_Set_2	2.01998	0	0.166667	942.432	89.042	9.08869e-21	25
M_0.5_F_lqpth_Set_3	2.00139	0	0.25	985.233	131.843	4.61627e-30	28
M_0.5_F_lqpth_Set_4	1.69789	0	0.125	987.449	134.059	1.52493e-30	27
M_0.5_F_lqpth_Set_5	1.81058	0	0.25	963.593	110.203	2.30944e-25	27
M_0.5_F_lqpth_Set_6	3.96896	0	0.166667	1294.91	441.524	2.61787e-97	39
M_0.5_F_lqpth_Set_7	1.88733	0	0.208333	956.609	103.219	7.58408e-24	30
M_0.5_F_lqpth_Set_8	1.97815	0	0.291667	1018.86	165.468	2.30591e-37	34
M_0.5_F_lqpth_Set_9	2.09038	0	0.25	1105.75	252.36	3.12226e-56	36
M_0.5_F_lqph_Set_1	2.043	0	0.0833333	5443.41	4590.02	0	47
M_0.5_F_lqph_Set_10	1.95621	0	0.25	NA	NA	NA	48
M_0.5_F_lqph_Set_11	1.72801	0	0.25	NA	NA	NA	49
M_0.5_F_lqph_Set_2	2.02044	0	0.166667	910.945	57.5551	6.24884e-14	18
M_0.5_F_lqph_Set_3	1.99448	0	0.25	NA	NA	NA	53
M_0.5_F_lqph_Set_4	1.81068	0	0.0416667	5482.15	4628.76	0	47
M_0.5_F_lqph_Set_5	1.74975	0	0.166667	NA	NA	NA	56
M_0.5_F_lqph_Set_6	3.5074	0	0.166667	NA	NA	NA	86
M_0.5_F_lqph_Set_7	1.81092	0	0.166667	1040.06	186.669	5.74198e-42	33
M_0.5_F_lqph_Set_8	1.96044	0	0.166667	NA	NA	NA	51
M_0.5_F_lqph_Set_9	2.12433	0	0.208333	2313.21	1459.82	1.98646009829515e-318	45
M_0.75_F_lq_Set_1	2.03903	0	0.208333	880.057	26.6668	3.185e-07	4
M_0.75_F_lq_Set_10	2.64915	0	0.208333	901.396	48.0062	7.40142e-12	6
M_0.75_F_lq_Set_11	2.40902	0	0.208333	862.511	9.12104	0.00205646	7
M_0.75_F_lq_Set_2	2.09816	0	0.208333	866.311	12.9212	0.000307564	4
M_0.75_F_lq_Set_3	2.01341	0	0.208333	899.11	45.7199	2.32152e-11	3
M_0.75_F_lq_Set_4	2.04409	0	0.0416667	899.06	45.6697	2.38055e-11	4
M_0.75_F_lq_Set_5	1.30065	0	0.25	909.267	55.8775	1.44575e-13	4
M_0.75_F_lq_Set_6	2.96426	0	0.166667	918.681	65.2913	1.30589e-15	4
M_0.75_F_lq_Set_7	2.04553	0	0.25	862.844	9.45437	0.00174076	6
M_0.75_F_lq_Set_8	1.34116	0	0.291667	883.878	30.4877	4.71415e-08	6
M_0.75_F_lq_Set_9	2.27395	0	0.208333	866.115	12.7247	0.000339305	5
M_0.75_F_lp_Set_1	1.73144	0	0.0416667	924.546	71.1563	6.95545e-17	3
M_0.75_F_lp_Set_10	2.12817	0	0	902.266	48.8764	4.79008e-12	4
M_0.75_F_lp_Set_11	2.00036	0	0	899.534	46.1437	1.87825e-11	9
M_0.75_F_lp_Set_2	2.88463	0	0.0416667	911.934	58.5438	3.81158e-14	3
M_0.75_F_lp_Set_3	1.99996	0	0.125	928.081	74.6913	1.18775e-17	3
M_0.75_F_lp_Set_4	2.19495	0	0	906.258	52.8683	6.50907e-13	2
M_0.75_F_lp_Set_5	1.96885	0	0.0416667	924.035	70.6452	8.98087e-17	3
M_0.75_F_lp_Set_6	3.80548	0	0.0833333	914.517	61.1271	1.04749e-14	2
M_0.75_F_lp_Set_7	2.00074	0	0	904.579	51.1888	1.50741e-12	5
M_0.75_F_lp_Set_8	1.99056	0	0.0416667	902.566	49.1763	4.1231e-12	6
M_0.75_F_lp_Set_9	2.99294	0	0.0416667	910.285	56.8953	8.69099e-14	4
M_0.75_F_q_Set_1	2.23742	0	0.25	927.042	73.652	1.99707e-17	2
M_0.75_F_q_Set_10	2.19756	0	0.25	930.484	77.0939	3.57269e-18	3
M_0.75_F_q_Set_11	2.94149	0	0.208333	917.83	64.4398	1.99899e-15	4
M_0.75_F_q_Set_2	77.3158	0	0.208333	919.309	65.919	9.54133e-16	2
M_0.75_F_q_Set_3	2.37744	0	0.208333	926.149	72.7586	3.1218e-17	2
M_0.75_F_q_Set_4	2.15446	0	0.208333	930.214	76.8239	4.08911e-18	2
M_0.75_F_q_Set_5	2.09251	0	0.25	934.236	80.8456	5.47439e-19	2
M_0.75_F_q_Set_6	4.58524	0	0.291667	936.149	82.7588	2.10323e-19	2
M_0.75_F_q_Set_7	2.52287	0	0.25	915.615	62.2251	6.04946e-15	3
M_0.75_F_q_Set_8	2.25995	0	0.25	923.258	69.8677	1.32481e-16	3
M_0.75_F_q_Set_9	3.60277	0	0.25	921.104	67.7139	3.88912e-16	3
M_0.75_F_qp_Set_1	2.47715	0	0.208333	909.886	56.4961	1.06108e-13	3
M_0.75_F_qp_Set_10	2.15447	0	0.25	928.916	75.526	7.82482e-18	6
M_0.75_F_qp_Set_11	1.99858	0	0.291667	884.187	30.7971	4.03859e-08	8
M_0.75_F_qp_Set_2	2.13226	0	0.208333	904.629	51.2392	1.46984e-12	3
M_0.75_F_qp_Set_3	2.29671	0	0.208333	926.983	73.5929	2.05704e-17	3
M_0.75_F_qp_Set_4	2.08819	0	0.208333	932.462	79.0717	1.32904e-18	3
M_0.75_F_qp_Set_5	2.04945	0	0.25	935.954	82.5642	2.31816e-19	3
M_0.75_F_qp_Set_6	2.17619	0	0.208333	935.903	82.5132	2.37804e-19	3
M_0.75_F_qp_Set_7	2.21902	0	0.25	886.239	32.849	1.44764e-08	5
M_0.75_F_qp_Set_8	2.46701	0	0.208333	909.832	56.4419	1.09023e-13	6
M_0.75_F_qp_Set_9	2.55796	0	0.208333	903.75	50.3598	2.28161e-12	6
M_0.75_F_lqp_Set_1	1.99859	0	0.166667	867.959	14.5692	0.000134914	5
M_0.75_F_lqp_Set_10	2.13746	0	0.208333	890.885	37.4955	1.418e-09	8
M_0.75_F_lqp_Set_11	1.99064	0	0.208333	857.757	4.36709	0.0221527	11
M_0.75_F_lqp_Set_2	2.01956	0	0.166667	866.727	13.3372	0.000249805	5
M_0.75_F_lqp_Set_3	1.98913	0	0.208333	900.912	47.5217	9.4301e-12	5
M_0.75_F_lqp_Set_4	2.02191	0	0.0416667	897.287	43.8969	5.77607e-11	3
M_0.75_F_lqp_Set_5	2.07121	0	0.25	894.105	40.7147	2.83559e-10	4
M_0.75_F_lqp_Set_6	3.02811	0	0.166667	914.517	61.1271	1.04749e-14	2
M_0.75_F_lqp_Set_7	2.01113	0	0.208333	853.39	0	0.196666	7
M_0.75_F_lqp_Set_8	1.99888	0	0.333333	863.327	9.93705	0.0013675	8
M_0.75_F_lqp_Set_9	2.05061	0	0.208333	866.557	13.167	0.000271988	6
M_0.75_F_lqpt_Set_1	1.93484	0	0.208333	860.807	7.41718	0.00482069	12
M_0.75_F_lqpt_Set_10	2.01632	0	0.25	900	46.6103	1.48737e-11	17
M_0.75_F_lqpt_Set_11	1.99076	0	0.208333	875.188	21.7981	3.63348e-06	20
M_0.75_F_lqpt_Set_2	2.01978	0	0.166667	877.586	24.1957	1.09572e-06	11
M_0.75_F_lqpt_Set_3	1.72479	0	0.208333	901.42	48.03	7.31378e-12	13
M_0.75_F_lqpt_Set_4	2.0494	0	0.0416667	899.346	45.9562	2.06283e-11	10
M_0.75_F_lqpt_Set_5	2.00469	0	0.25	893.178	39.7877	4.5075e-10	12
M_0.75_F_lqpt_Set_6	2.94281	0	0.125	916.779	63.3893	3.38e-15	11
M_0.75_F_lqpt_Set_7	2.02933	0	0.166667	853.925	0.534641	0.150533	13
M_0.75_F_lqpt_Set_8	1.94993	0	0.291667	875.634	22.2442	2.90707e-06	19
M_0.75_F_lqpt_Set_9	2.04643	0	0.208333	886.476	33.0858	1.286e-08	17
M_0.75_F_lqpth_Set_1	1.97217	0	0.208333	877.667	24.2769	1.05213e-06	16
M_0.75_F_lqpth_Set_10	1.85482	0	0.25	907.837	54.4466	2.95658e-13	20
M_0.75_F_lqpth_Set_11	2.06322	0	0.25	918.629	65.2393	1.3403e-15	26
M_0.75_F_lqpth_Set_2	2.02921	0	0.166667	888.364	34.9741	5.00261e-09	14
M_0.75_F_lqpth_Set_3	1.99537	0	0.208333	1042.1	188.708	2.07175e-42	31
M_0.75_F_lqpth_Set_4	1.77517	0	0.0416667	949.479	96.0893	2.68043e-22	21
M_0.75_F_lqpth_Set_5	1.80201	0	0.25	931.083	77.6927	2.64833e-18	21
M_0.75_F_lqpth_Set_6	3.18628	0	0.166667	1011.59	158.201	8.72586e-36	27
M_0.75_F_lqpth_Set_7	2.07528	0	0.166667	881.367	27.9768	1.65445e-07	19
M_0.75_F_lqpth_Set_8	1.98081	0	0.291667	914.912	61.5221	8.59766e-15	25
M_0.75_F_lqpth_Set_9	2.05864	0	0.208333	908.839	55.449	1.79115e-13	21
M_0.75_F_lqph_Set_1	1.96253	0	0.0833333	1009.34	155.949	2.69057e-35	30
M_0.75_F_lqph_Set_10	1.9459	0	0.208333	1279.33	425.939	6.34381e-94	39
M_0.75_F_lqph_Set_11	2.01171	0	0.25	918.734	65.3438	1.27204e-15	24
M_0.75_F_lqph_Set_2	2.03229	0	0.166667	885.978	32.5883	1.64922e-08	12
M_0.75_F_lqph_Set_3	1.9964	0	0.208333	1306.43	453.037	8.27808e-100	39
M_0.75_F_lqph_Set_4	1.75034	0	0.0416667	1043.19	189.8	1.19975e-42	30
M_0.75_F_lqph_Set_5	1.71153	0	0.166667	1243.73	390.344	3.40089e-86	38
M_0.75_F_lqph_Set_6	3.52579	0	0.166667	NA	NA	NA	69
M_0.75_F_lqph_Set_7	2.02554	0	0.166667	888.738	35.3485	4.14859e-09	18
M_0.75_F_lqph_Set_8	1.96142	0	0.208333	931.696	78.3065	1.94847e-18	24
M_0.75_F_lqph_Set_9	2.05644	0	0.208333	890.513	37.1233	1.70804e-09	14
M_1_F_lq_Set_1	2.02232	0	0.208333	880.226	26.8357	2.92702e-07	4
M_1_F_lq_Set_10	2.57445	0	0.208333	901.714	48.3242	6.31349e-12	6
M_1_F_lq_Set_11	2.2938	0	0.208333	862.819	9.42859	0.00176334	7
M_1_F_lq_Set_2	2.07821	0	0.166667	866.63	13.2404	0.000262189	4
M_1_F_lq_Set_3	2.00765	0	0.208333	899.25	45.8598	2.16472e-11	3
M_1_F_lq_Set_4	2.03224	0	0.0416667	899.271	45.8811	2.1418e-11	4
M_1_F_lq_Set_5	2.10245	0	0.25	909.4	56.01	1.35304e-13	4
M_1_F_lq_Set_6	2.96657	0	0.166667	918.839	65.4488	1.207e-15	4
M_1_F_lq_Set_7	2.02884	0	0.25	863.175	9.78537	0.00147524	6
M_1_F_lq_Set_8	2.03745	0	0.291667	884.064	30.6742	4.29452e-08	6
M_1_F_lq_Set_9	2.25742	0	0.208333	866.4	13.0096	0.000294254	5
M_1_F_lp_Set_1	1.73463	0	0.0416667	924.611	71.2207	6.73505e-17	3
M_1_F_lp_Set_10	2.11672	0	0	902.608	49.218	4.03814e-12	4
M_1_F_lp_Set_11	2.00151	0	0	901.077	47.6875	8.67985e-12	9
M_1_F_lp_Set_2	2.81617	0	0.0416667	912.401	59.0114	3.01696e-14	3
M_1_F_lp_Set_3	1.99941	0	0.125	928.563	75.1735	9.33259e-18	3
M_1_F_lp_Set_4	2.20463	0	0	906.364	52.9736	6.17531e-13	2
M_1_F_lp_Set_5	1.90375	0	0.0416667	924.475	71.0851	7.20761e-17	3
M_1_F_lp_Set_6	3.80245	0	0.0833333	914.637	61.2475	9.86297e-15	2
M_1_F_lp_Set_7	1.99655	0	0	905.118	51.7277	1.15131e-12	5
M_1_F_lp_Set_8	1.98774	0	0.0416667	903.465	50.0754	2.63027e-12	6
M_1_F_lp_Set_9	3.14074	0	0.0416667	910.449	57.0589	8.00852e-14	4
M_1_F_q_Set_1	2.19483	0	0.25	927.096	73.7058	1.94411e-17	2
M_1_F_q_Set_10	2.17816	0	0.25	930.548	77.1579	3.46023e-18	3
M_1_F_q_Set_11	2.78008	0	0.208333	917.906	64.5162	1.92404e-15	4
M_1_F_q_Set_2	66.5729	0	0.208333	919.36	65.9698	9.30202e-16	2
M_1_F_q_Set_3	2.34189	0	0.208333	926.194	72.8042	3.05135e-17	2
M_1_F_q_Set_4	2.13117	0	0.208333	930.28	76.8897	3.95685e-18	2
M_1_F_q_Set_5	2.07349	0	0.25	934.295	80.9047	5.31486e-19	2
M_1_F_q_Set_6	6.11154	0	0.291667	936.177	82.7874	2.07331e-19	2
M_1_F_q_Set_7	2.47472	0	0.25	915.686	62.2958	5.83951e-15	3
M_1_F_q_Set_8	2.23107	0	0.25	923.321	69.9313	1.28335e-16	3
M_1_F_q_Set_9	3.33264	0	0.25	921.16	67.7705	3.78054e-16	3
M_1_F_qp_Set_1	2.32846	0	0.208333	910.843	57.4526	6.57751e-14	3
M_1_F_qp_Set_10	2.10425	0	0.25	926.959	73.5687	2.08202e-17	5
M_1_F_qp_Set_11	2.01052	0	0.291667	888.954	35.5643	3.7243e-09	9
M_1_F_qp_Set_2	2.05111	0	0.208333	905.017	51.6266	1.21104e-12	3
M_1_F_qp_Set_3	2.25001	0	0.208333	927.269	73.8793	1.78256e-17	3
M_1_F_qp_Set_4	2.06197	0	0.208333	932.74	79.3505	1.15605e-18	3
M_1_F_qp_Set_5	2.02616	0	0.25	936.311	82.9206	1.9398e-19	3
M_1_F_qp_Set_6	2.61126	0	0.208333	936.018	82.6278	2.24559e-19	3
M_1_F_qp_Set_7	2.10937	0	0.25	887.452	34.0621	7.8929e-09	5
M_1_F_qp_Set_8	2.35238	0	0.208333	908.408	55.0182	2.22162e-13	5
M_1_F_qp_Set_9	2.05662	0	0.208333	904.709	51.3191	1.41229e-12	6
M_1_F_lqp_Set_1	1.98517	0	0.166667	869.399	16.0087	6.56886e-05	5
M_1_F_lqp_Set_10	2.03472	0	0.208333	888.056	34.6663	5.83481e-09	6
M_1_F_lqp_Set_11	1.99616	0	0.208333	857.525	4.13523	0.0248757	10
M_1_F_lqp_Set_2	2.01959	0	0.166667	868.065	14.6749	0.000127972	5
M_1_F_lqp_Set_3	1.97279	0	0.208333	902.34	48.9497	4.61776e-12	5
M_1_F_lqp_Set_4	2.01479	0	0.0416667	897.71	44.3203	4.67401e-11	3
M_1_F_lqp_Set_5	2.03469	0	0.25	895.452	42.0622	1.4456e-10	4
M_1_F_lqp_Set_6	3.09153	0	0.166667	914.637	61.2475	9.86297e-15	2
M_1_F_lqp_Set_7	2.01311	0	0.166667	855.058	1.66826	0.0854024	7
M_1_F_lqp_Set_8	2.00718	0	0.291667	866.322	12.932	0.000305896	8
M_1_F_lqp_Set_9	2.02772	0	0.208333	868.1	14.7097	0.000125765	6
M_1_F_lqpt_Set_1	1.90693	0	0.0833333	872.302	18.9122	1.53812e-05	11
M_1_F_lqpt_Set_10	2.02681	0	0.208333	899.175	45.7851	2.24706e-11	15
M_1_F_lqpt_Set_11	1.99521	0	0.208333	868.652	15.2618	9.54269e-05	16
M_1_F_lqpt_Set_2	2.02017	0	0.166667	870.938	17.5484	3.04183e-05	7
M_1_F_lqpt_Set_3	1.68328	0	0.208333	900.153	46.7633	1.37786e-11	8
M_1_F_lqpt_Set_4	2.02939	0	0.0416667	896.648	43.2579	7.95046e-11	8
M_1_F_lqpt_Set_5	2.02879	0	0.25	892.694	39.3044	5.7397e-10	10
M_1_F_lqpt_Set_6	2.83583	0	0.0833333	914.093	60.7034	1.29465e-14	7
M_1_F_lqpt_Set_7	2.01243	0	0.166667	856.339	2.94879	0.0450202	10
M_1_F_lqpt_Set_8	1.96876	0	0.25	865.402	12.0125	0.00048446	13
M_1_F_lqpt_Set_9	2.02171	0	0.208333	874.902	21.5118	4.1928e-06	11
M_1_F_lqpth_Set_1	1.95797	0	0.208333	883.122	29.7323	6.87759e-08	14
M_1_F_lqpth_Set_10	2.02189	0	0.208333	948.31	94.9202	4.80921e-22	24
M_1_F_lqpth_Set_11	2.02393	0	0.25	916.369	62.9786	4.15051e-15	24
M_1_F_lqpth_Set_2	2.03112	0	0.166667	881.496	28.106	1.55091e-07	11
M_1_F_lqpth_Set_3	1.99198	0	0.208333	1027.52	174.13	3.03281e-39	29
M_1_F_lqpth_Set_4	1.80569	0	0.0416667	909.927	56.5367	1.0398e-13	12
M_1_F_lqpth_Set_5	1.75539	0	0.25	943.342	89.9518	5.76695e-21	21
M_1_F_lqpth_Set_6	3.48094	0	0.125	1133.27	279.879	3.3022e-62	34
M_1_F_lqpth_Set_7	2.01955	0	0.166667	875.541	22.1512	3.04547e-06	15
M_1_F_lqpth_Set_8	1.97197	0	0.291667	881.993	28.6026	1.20991e-07	17
M_1_F_lqpth_Set_9	2.03259	0	0.208333	888.462	35.0722	4.76311e-09	15
M_1_F_lqph_Set_1	1.96555	0	0.0833333	898.383	44.9926	3.33968e-11	16
M_1_F_lqph_Set_10	2.20488	0	0.208333	953.91	100.52	2.92469e-23	23
M_1_F_lqph_Set_11	2.02267	0	0.25	895.647	42.2566	1.31168e-10	20
M_1_F_lqph_Set_2	2.02946	0	0.166667	890.485	37.0947	1.73266e-09	13
M_1_F_lqph_Set_3	1.99914	0	0.208333	991.272	137.882	2.25449e-31	25
M_1_F_lqph_Set_4	1.74489	0	0.0416667	912.033	58.6432	3.62678e-14	11
M_1_F_lqph_Set_5	1.66974	0	0.25	1093.7	240.312	1.29011e-53	33
M_1_F_lqph_Set_6	3.60627	0	0.166667	NA	NA	NA	53
M_1_F_lqph_Set_7	2.01108	0	0.166667	876.963	23.5733	1.49576e-06	15
M_1_F_lqph_Set_8	1.97074	0	0.25	914.894	61.5041	8.67532e-15	21
M_1_F_lqph_Set_9	2.0328	0	0.208333	884.324	30.9341	3.77111e-08	12
M_2_F_lq_Set_1	2.00355	0	0.208333	881.288	27.8976	1.72125e-07	4
M_2_F_lq_Set_10	2.14772	0	0.208333	897.98	44.5899	4.08456e-11	4
M_2_F_lq_Set_11	2.02563	0	0.208333	864.817	11.4272	0.000649146	7
M_2_F_lq_Set_2	2.03334	0	0.166667	868.576	15.186	9.91151e-05	4
M_2_F_lq_Set_3	1.98541	0	0.208333	900.116	46.7265	1.40343e-11	3
M_2_F_lq_Set_4	2.01897	0	0.0416667	897.609	44.2188	4.91746e-11	3
M_2_F_lq_Set_5	2.0387	0	0.25	910.243	56.8528	8.87785e-14	4
M_2_F_lq_Set_6	3.04848	0	0.166667	914.608	61.2181	1.00091e-14	2
M_2_F_lq_Set_7	2.00607	0	0.208333	862.333	8.9435	0.00224736	5
M_2_F_lq_Set_8	2.00745	0	0.25	885.238	31.8479	2.3881e-08	6
M_2_F_lq_Set_9	2.05691	0	0.208333	868.276	14.8862	0.000115142	5
M_2_F_lp_Set_1	1.73852	0	0.0416667	925.017	71.6275	5.49562e-17	3
M_2_F_lp_Set_10	2.29872	0	0	905.019	51.629	1.20955e-12	4
M_2_F_lp_Set_11	2.00061	0	0	906.271	52.8812	6.46729e-13	8
M_2_F_lp_Set_2	2.24331	0	0.0416667	911.669	58.279	4.35121e-14	2
M_2_F_lp_Set_3	1.98396	0	0.0416667	931.825	78.4346	1.82754e-18	3
M_2_F_lp_Set_4	2.2326	0	0	907.067	53.6773	4.34371e-13	2
M_2_F_lp_Set_5	1.89477	0	0.166667	927.473	74.0826	1.61022e-17	3
M_2_F_lp_Set_6	3.12146	0	0.0833333	915.466	62.0765	6.51611e-15	2
M_2_F_lp_Set_7	2.01832	0	0	908.7	55.3101	1.91995e-13	5
M_2_F_lp_Set_8	1.99089	0	0.0416667	901.89	48.5005	5.78071e-12	4
M_2_F_lp_Set_9	2.41409	0	0.0416667	911.552	58.1617	4.61408e-14	4
M_2_F_q_Set_1	2.14047	0	0.25	927.453	74.0634	1.62577e-17	2
M_2_F_q_Set_10	2.09234	0	0.208333	930.959	77.569	2.81729e-18	3
M_2_F_q_Set_11	2.28353	0	0.208333	918.412	65.0218	1.49424e-15	4
M_2_F_q_Set_2	32.2	0	0.208333	919.709	66.3189	7.81189e-16	2
M_2_F_q_Set_3	2.24866	0	0.208333	926.489	73.0988	2.63346e-17	2
M_2_F_q_Set_4	2.08037	0	0.208333	930.7	77.3097	3.20732e-18	2
M_2_F_q_Set_5	2.02283	0	0.25	934.683	81.2933	4.37633e-19	2
M_2_F_q_Set_6	25.497	0	0.0416667	936.351	82.9608	1.90113e-19	2
M_2_F_q_Set_7	2.28781	0	0.25	916.169	62.7788	4.58663e-15	3
M_2_F_q_Set_8	2.14292	0	0.25	923.74	70.3498	1.04101e-16	3
M_2_F_q_Set_9	2.79643	0	0.208333	921.521	68.1306	3.15754e-16	3
M_2_F_qp_Set_1	2.08754	0	0.208333	915.171	61.781	7.55345e-15	3
M_2_F_qp_Set_10	2.01766	0	0.25	930.782	77.3916	3.07857e-18	5
M_2_F_qp_Set_11	2.01177	0	0.25	897.146	43.7556	6.19892e-11	9
M_2_F_qp_Set_2	2.00314	0	0.208333	907.48	54.0904	3.53301e-13	3
M_2_F_qp_Set_3	2.10985	0	0.208333	929.152	75.7616	6.95505e-18	3
M_2_F_qp_Set_4	2.01689	0	0.25	934.508	81.1185	4.77617e-19	3
M_2_F_qp_Set_5	1.99971	0	0.25	938.52	85.1305	6.42509e-20	3
M_2_F_qp_Set_6	98.2689	0	0.166667	936.809	83.4187	1.51214e-19	3
M_2_F_qp_Set_7	2.01126	0	0.25	895.878	42.4884	1.16811e-10	6
M_2_F_qp_Set_8	2.08785	0	0.208333	914.087	60.6971	1.29873e-14	5
M_2_F_qp_Set_9	2.0032	0	0.208333	907.121	53.7307	4.22914e-13	5
M_2_F_lqp_Set_1	1.99989	0	0.166667	876.017	22.6275	2.40013e-06	5
M_2_F_lqp_Set_10	2.01649	0	0.208333	894.991	41.6009	1.82056e-10	5
M_2_F_lqp_Set_11	2.00348	0	0.166667	862.613	9.22318	0.00195407	8
M_2_F_lqp_Set_2	2.003	0	0.166667	869.598	16.2079	5.94614e-05	4
M_2_F_lqp_Set_3	1.98905	0	0.208333	905.484	52.0936	9.58853e-13	4
M_2_F_lqp_Set_4	2.03492	0	0.0416667	900.22	46.8304	1.33241e-11	3
M_2_F_lqp_Set_5	2.01115	0	0.25	906.04	52.6497	7.26097e-13	5
M_2_F_lqp_Set_6	3.12276	0	0.0833333	915.466	62.0765	6.51611e-15	2
M_2_F_lqp_Set_7	2.00118	0	0.166667	862.565	9.1746	0.00200211	7
M_2_F_lqp_Set_8	2.00001	0	0.166667	873.498	20.108	8.45917e-06	7
M_2_F_lqp_Set_9	2.00395	0	0.208333	869.539	16.1486	6.12507e-05	4
M_2_F_lqpt_Set_1	2.00065	0	0.166667	872.661	19.2709	1.28561e-05	7
M_2_F_lqpt_Set_10	2.0183	0	0.208333	896.105	42.7153	1.04286e-10	8
M_2_F_lqpt_Set_11	2.00296	0	0.166667	865.18	11.7896	0.000541575	10
M_2_F_lqpt_Set_2	2.00296	0	0.166667	871.501	18.1112	2.29584e-05	5
M_2_F_lqpt_Set_3	1.9877	0	0.208333	903.663	50.2735	2.38218e-12	4
M_2_F_lqpt_Set_4	2.02753	0	0.0416667	896.22	42.8298	9.84841e-11	4
M_2_F_lqpt_Set_5	2.01057	0	0.25	910.968	57.5781	6.1773e-14	8
M_2_F_lqpt_Set_6	3.12276	0	0.0833333	916.363	62.9731	4.16193e-15	4
M_2_F_lqpt_Set_7	2.00201	0	0.166667	862.97	9.57998	0.00163479	9
M_2_F_lqpt_Set_8	2.00031	0	0.166667	872.145	18.7551	1.66385e-05	9
M_2_F_lqpt_Set_9	2.00412	0	0.208333	871.438	18.048	2.36952e-05	5
M_2_F_lqpth_Set_1	1.97816	0	0.0833333	885.482	32.0925	2.11317e-08	11
M_2_F_lqpth_Set_10	2.06072	0	0.0833333	938.372	84.982	6.92029e-20	19
M_2_F_lqpth_Set_11	2.00385	0	0.208333	881.909	28.5192	1.26143e-07	15
M_2_F_lqpth_Set_2	2.00555	0	0.166667	876.722	23.3316	1.68786e-06	8
M_2_F_lqpth_Set_3	1.95932	0	0.166667	932.698	79.3076	1.18115e-18	14
M_2_F_lqpth_Set_4	2.04247	0	0.0416667	900.082	46.6922	1.42771e-11	6
M_2_F_lqpth_Set_5	2.00195	0	0.0416667	1003.16	149.772	5.90405e-34	26
M_2_F_lqpth_Set_6	2.82167	0	0.0833333	972.573	119.183	2.5909e-27	19
M_2_F_lqpth_Set_7	2.0002	0	0.166667	868.584	15.1936	9.87378e-05	11
M_2_F_lqpth_Set_8	1.987	0	0.208333	907.955	54.565	2.78667e-13	18
M_2_F_lqpth_Set_9	2.00401	0	0.208333	879.742	26.3525	3.72697e-07	9
M_2_F_lqph_Set_1	1.98312	0	0.0833333	897.368	43.9776	5.54769e-11	14
M_2_F_lqph_Set_10	2.06179	0	0.0833333	938.642	85.2517	6.04724e-20	19
M_2_F_lqph_Set_11	2.00378	0	0.208333	878.208	24.818	8.02735e-07	14
M_2_F_lqph_Set_2	2.00556	0	0.166667	873.834	20.4442	7.15037e-06	7
M_2_F_lqph_Set_3	1.95435	0	0.166667	951.471	98.0815	9.89904e-23	18
M_2_F_lqph_Set_4	2.04287	0	0.0416667	902.809	49.4192	3.65168e-12	7
M_2_F_lqph_Set_5	2.00182	0	0.0833333	1003.39	150.003	5.25921e-34	26
M_2_F_lqph_Set_6	2.82253	0	0.0833333	998.515	145.125	6.02806e-33	23
M_2_F_lqph_Set_7	1.99991	0	0.166667	868.618	15.2282	9.7044e-05	11
M_2_F_lqph_Set_8	1.98959	0	0.208333	940.487	87.0975	2.403e-20	23
M_2_F_lqph_Set_9	2.00381	0	0.208333	873.794	20.404	7.29548e-06	7
M_3_F_lq_Set_1	2.00157	0	0.208333	882.871	29.481	7.79833e-08	4
M_3_F_lq_Set_10	2.01084	0	0.208333	899.104	45.7145	2.3278e-11	4
M_3_F_lq_Set_11	2.00441	0	0.208333	865.051	11.6606	0.000577648	6
M_3_F_lq_Set_2	2.00834	0	0.166667	867.52	14.1298	0.000168067	3
M_3_F_lq_Set_3	1.97072	0	0.208333	901.397	48.0067	7.3997e-12	3
M_3_F_lq_Set_4	2.03784	0	0.0416667	898.613	45.223	2.97637e-11	3
M_3_F_lq_Set_5	2.01266	0	0.25	911.528	58.1384	4.668e-14	4
M_3_F_lq_Set_6	3.26115	0	0.125	914.914	61.5238	8.59037e-15	2
M_3_F_lq_Set_7	2.00365	0	0.208333	863.857	10.4669	0.00104924	5
M_3_F_lq_Set_8	2.00363	0	0.25	887.002	33.6123	9.88353e-09	6
M_3_F_lq_Set_9	2.01006	0	0.208333	868.603	15.2128	9.77927e-05	4
M_3_F_lp_Set_1	1.74551	0	0.0416667	925.681	72.2911	3.9438e-17	3
M_3_F_lp_Set_10	2.2292	0	0	909.431	56.0414	1.33196e-13	4
M_3_F_lp_Set_11	1.99349	0	0	904.7	51.3098	1.41887e-12	6
M_3_F_lp_Set_2	2.26897	0	0.0416667	912.576	59.1859	2.76484e-14	2
M_3_F_lp_Set_3	1.5742	0	0.0416667	933.871	80.4811	6.5688e-19	2
M_3_F_lp_Set_4	2.22648	0	0	908.242	54.8518	2.41439e-13	2
M_3_F_lp_Set_5	1.50122	0	0.0416667	932.587	79.1973	1.24809e-18	3
M_3_F_lp_Set_6	2.56929	0	0.0416667	916.912	63.5224	3.1624e-15	2
M_3_F_lp_Set_7	2.05819	0	0	909.057	55.6673	1.60593e-13	4
M_3_F_lp_Set_8	1.95613	0	0.0416667	905.255	51.8654	1.07472e-12	4
M_3_F_lp_Set_9	2.19761	0	0.0416667	913.448	60.0579	1.78777e-14	4
M_3_F_q_Set_1	2.07614	0	0.25	928.025	74.635	1.22164e-17	2
M_3_F_q_Set_10	2.0517	0	0.208333	931.617	78.227	2.02748e-18	3
M_3_F_q_Set_11	2.169	0	0.25	919.231	65.8408	9.92177e-16	4
M_3_F_q_Set_2	8.5881	0	0.208333	920.295	66.905	5.82755e-16	2
M_3_F_q_Set_3	2.17467	0	0.208333	926.965	73.5755	2.07498e-17	2
M_3_F_q_Set_4	2.05235	0	0.208333	931.357	77.9672	2.30865e-18	2
M_3_F_q_Set_5	2.01004	0	0.25	935.308	81.9178	3.20259e-19	2
M_3_F_q_Set_6	42.5205	0	0.0416667	936.632	83.2418	1.65194e-19	2
M_3_F_q_Set_7	2.19388	0	0.25	916.972	63.5824	3.06888e-15	3
M_3_F_q_Set_8	2.07369	0	0.25	924.42	71.0297	7.41001e-17	3
M_3_F_q_Set_9	2.4852	0	0.208333	922.098	68.7079	2.36592e-16	3
M_3_F_qp_Set_1	2.03372	0	0.25	919.916	66.5259	7.04377e-16	3
M_3_F_qp_Set_10	1.98354	0	0.25	936.544	83.1538	1.72627e-19	5
M_3_F_qp_Set_11	2.01802	0	0.208333	907.191	53.8015	4.082e-13	9
M_3_F_qp_Set_2	3.32006	0	0.208333	911.333	57.9431	5.14692e-14	3
M_3_F_qp_Set_3	2.05312	0	0.208333	932.26	78.8701	1.46995e-18	3
M_3_F_qp_Set_4	1.98398	0	0.25	937.306	83.9162	1.17911e-19	3
M_3_F_qp_Set_5	1.98353	0	0.25	939.037	85.6469	4.96299e-20	2
M_3_F_qp_Set_6	NA	NA	0	938.353	84.9627	6.98751e-20	3
M_3_F_qp_Set_7	2.01649	0	0.208333	902.936	49.5458	3.42772e-12	6
M_3_F_qp_Set_8	2.03418	0	0.25	921.005	67.6145	4.08712e-16	5
M_3_F_qp_Set_9	2.08481	0	0.208333	910.627	57.2369	7.3265e-14	4
M_3_F_lqp_Set_1	2.00091	0	0.208333	883.547	30.1573	5.56091e-08	5
M_3_F_lqp_Set_10	2.03896	0	0.0416667	904.044	50.6545	1.96896e-12	5
M_3_F_lqp_Set_11	2.00211	0	0.166667	873.226	19.8361	9.69125e-06	8
M_3_F_lqp_Set_2	2.00174	0	0.166667	874.664	21.2737	4.72283e-06	4
M_3_F_lqp_Set_3	1.98675	0	0.208333	908.04	54.6499	2.6709e-13	3
M_3_F_lqp_Set_4	2.03646	0	0.0416667	903.739	50.3491	2.29381e-12	3
M_3_F_lqp_Set_5	2.00598	0	0.208333	917.06	63.6704	2.93689e-15	5
M_3_F_lqp_Set_6	2.56978	0	0.0416667	916.912	63.5224	3.1624e-15	2
M_3_F_lqp_Set_7	2.00197	0	0.166667	870.891	17.5013	3.11441e-05	7
M_3_F_lqp_Set_8	2.00102	0	0.208333	882.151	28.7613	1.1176e-07	6
M_3_F_lqp_Set_9	2.0019	0	0.166667	874.606	21.2156	4.86214e-06	4
M_3_F_lqpt_Set_1	2.00049	0	0.125	881.678	28.2877	1.41624e-07	7
M_3_F_lqpt_Set_10	2.03792	0	0.0416667	903.132	49.7421	3.10715e-12	6
M_3_F_lqpt_Set_11	2.00211	0	0.166667	872.805	19.4148	1.19635e-05	9
M_3_F_lqpt_Set_2	2.00174	0	0.166667	876.804	23.4136	1.62007e-06	5
M_3_F_lqpt_Set_3	1.98437	0	0.208333	908.454	55.0638	2.17155e-13	4
M_3_F_lqpt_Set_4	2.03678	0	0.0416667	900.609	47.2187	1.09729e-11	4
M_3_F_lqpt_Set_5	2.00617	0	0.208333	919.371	65.9807	9.25143e-16	7
M_3_F_lqpt_Set_6	2.56929	0	0.0416667	916.912	63.5224	3.1624e-15	2
M_3_F_lqpt_Set_7	2.00196	0	0.166667	872.865	19.4749	1.16096e-05	9
M_3_F_lqpt_Set_8	2.00072	0	0.125	881.878	28.4885	1.28094e-07	8
M_3_F_lqpt_Set_9	2.00192	0	0.166667	876.739	23.3487	1.67346e-06	5
M_3_F_lqpth_Set_1	1.98154	0	0.0833333	886.184	32.7936	1.48832e-08	9
M_3_F_lqpth_Set_10	2.00394	0	0.0416667	924.516	71.1258	7.06258e-17	14
M_3_F_lqpth_Set_11	1.99957	0	0.166667	869.405	16.0149	6.54845e-05	9
M_3_F_lqpth_Set_2	2.0023	0	0.166667	877.933	24.5435	9.20815e-07	7
M_3_F_lqpth_Set_3	1.99682	0	0.0833333	905.619	52.229	8.96069e-13	4
M_3_F_lqpth_Set_4	2.00392	0	0.0416667	902.757	49.3669	3.74838e-12	6
M_3_F_lqpth_Set_5	1.56138	0	0.0833333	983.919	130.529	8.90458e-30	23
M_3_F_lqpth_Set_6	2.4965	0	0.0416667	963.884	110.494	1.99599e-25	17
M_3_F_lqpth_Set_7	2.00098	0	0.125	869.441	16.0506	6.4326e-05	9
M_3_F_lqpth_Set_8	1.98957	0	0.0833333	900.28	46.8905	1.29295e-11	14
M_3_F_lqpth_Set_9	2.00249	0	0.166667	877.879	24.4889	9.46304e-07	7
M_3_F_lqph_Set_1	1.98229	0	0.0833333	886.207	32.8168	1.4711e-08	9
M_3_F_lqph_Set_10	2.00407	0	0.0416667	990.74	137.351	2.94062e-31	25
M_3_F_lqph_Set_11	1.99958	0	0.166667	875.786	22.3957	2.69505e-06	11
M_3_F_lqph_Set_2	2.00234	0	0.166667	875.168	21.7784	3.66957e-06	6
M_3_F_lqph_Set_3	1.9968	0	0.0833333	910.715	57.3253	7.0098e-14	6
M_3_F_lqph_Set_4	2.00381	0	0.0416667	902.756	49.3663	3.7495e-12	6
M_3_F_lqph_Set_5	1.56469	0	0.0833333	1109.37	255.977	5.11816e-57	33
M_3_F_lqph_Set_6	2.49692	0	0.0416667	963.884	110.494	1.99599e-25	17
M_3_F_lqph_Set_7	2.00099	0	0.125	872.557	19.1675	1.35379e-05	10
M_3_F_lqph_Set_8	1.98991	0	0.0833333	913.722	60.3325	1.55844e-14	17
M_3_F_lqph_Set_9	2.00243	0	0.166667	875.124	21.7338	3.75236e-06	6
M_4_F_lq_Set_1	2.00143	0	0.208333	884.885	31.4955	2.84821e-08	4
M_4_F_lq_Set_10	2.01948	0	0.166667	900.549	47.159	1.13053e-11	4
M_4_F_lq_Set_11	2.00277	0	0.208333	868.161	14.7706	0.00012199	6
M_4_F_lq_Set_2	2.00274	0	0.166667	869.155	15.7647	7.42127e-05	3
M_4_F_lq_Set_3	1.98923	0	0.208333	903.022	49.6321	3.28292e-12	3
M_4_F_lq_Set_4	2.04389	0	0.0416667	899.888	46.4982	1.57313e-11	3
M_4_F_lq_Set_5	2.01081	0	0.25	913.21	59.8203	2.01337e-14	4
M_4_F_lq_Set_6	3.09555	0	0.0833333	915.346	61.9563	6.91972e-15	2
M_4_F_lq_Set_7	2.0025	0	0.208333	865.772	12.3821	0.000402701	5
M_4_F_lq_Set_8	2.0016	0	0.208333	889.279	35.8895	3.16539e-09	6
M_4_F_lq_Set_9	2.00293	0	0.166667	869.066	15.6762	7.75673e-05	3
M_4_F_lp_Set_1	1.78699	0	0.166667	926.633	73.2435	2.4497e-17	3
M_4_F_lp_Set_10	2.2945	0	0.0416667	911.842	58.4521	3.99039e-14	3
M_4_F_lp_Set_11	2.07329	0	0.0833333	906.446	53.056	5.92594e-13	5
M_4_F_lp_Set_2	2.35313	0	0.0833333	913.873	60.4831	1.44538e-14	2
M_4_F_lp_Set_3	1.56358	0	0.0416667	936.347	82.9571	1.90464e-19	2
M_4_F_lp_Set_4	2.29433	0	0.0416667	909.913	56.5233	1.04678e-13	2
M_4_F_lp_Set_5	NA	NA	0	937.25	83.8599	1.21276e-19	2
M_4_F_lp_Set_6	3.22973	0	0.0416667	919.07	65.6803	1.07508e-15	2
M_4_F_lp_Set_7	2.06231	0	0.0833333	910.69	57.3001	7.09858e-14	4
M_4_F_lp_Set_8	1.78699	0	0.166667	910.129	56.7387	9.39891e-14	4
M_4_F_lp_Set_9	2.33456	0	0.0833333	916.324	62.9342	4.24367e-15	4
M_4_F_q_Set_1	2.05872	0	0.25	928.794	75.4039	8.31742e-18	2
M_4_F_q_Set_10	2.03395	0	0.25	932.528	79.138	1.28567e-18	3
M_4_F_q_Set_11	2.11768	0	0.25	920.363	66.9732	5.63215e-16	4
M_4_F_q_Set_2	3.96626	0	0.208333	921.126	67.7362	3.84592e-16	2
M_4_F_q_Set_3	2.10599	0	0.208333	927.631	74.2409	1.48773e-17	2
M_4_F_q_Set_4	2.03335	0	0.25	932.241	78.8515	1.48371e-18	2
M_4_F_q_Set_5	1.99941	0	0.25	936.16	82.77	2.09146e-19	2
M_4_F_q_Set_6	89.0428	0	0.0416667	937.043	83.6528	1.34508e-19	2
M_4_F_q_Set_7	2.11912	0	0.25	918.102	64.7121	1.74451e-15	3
M_4_F_q_Set_8	2.05849	0	0.25	925.364	71.9742	4.621e-17	3
M_4_F_q_Set_9	2.32301	0	0.208333	922.904	69.5138	1.58123e-16	3
M_4_F_qp_Set_1	2.02628	0	0.208333	924.939	71.5488	5.71616e-17	3
M_4_F_qp_Set_10	1.95221	0	0.25	940.331	86.9409	2.59867e-20	4
M_4_F_qp_Set_11	2.01949	0	0.208333	913.944	60.5536	1.39537e-14	7
M_4_F_qp_Set_2	2.55543	0	0.25	916.711	63.3215	3.49654e-15	3
M_4_F_qp_Set_3	2.01403	0	0.208333	933.381	79.9914	8.39123e-19	2
M_4_F_qp_Set_4	1.95208	0	0.25	941.327	87.9366	1.57954e-20	3
M_4_F_qp_Set_5	1.95141	0	0.25	943.854	90.4643	4.46328e-21	1
M_4_F_qp_Set_6	NA	NA	0	938.837	85.447	5.48478e-20	2
M_4_F_qp_Set_7	2.01995	0	0.208333	911.334	57.9442	5.14403e-14	6
M_4_F_qp_Set_8	2.02697	0	0.208333	925.845	72.4549	3.63365e-17	4
M_4_F_qp_Set_9	2.19504	0	0.25	917.212	63.8216	2.72302e-15	4
M_4_F_lqp_Set_1	1.97412	0	0.208333	891.866	38.4764	8.68332e-10	5
M_4_F_lqp_Set_10	2.05299	0	0.166667	910.176	56.7856	9.18085e-14	4
M_4_F_lqp_Set_11	2.0022	0	0.208333	872.692	19.3019	1.26584e-05	5
M_4_F_lqp_Set_2	2.00176	0	0.208333	880.947	27.5571	2.04071e-07	4
M_4_F_lqp_Set_3	1.9824	0	0.208333	914.06	60.67	1.31648e-14	3
M_4_F_lqp_Set_4	2.0513	0	0.166667	908.05	54.6596	2.658e-13	3
M_4_F_lqp_Set_5	1.91957	0	0.25	923.132	69.7422	1.41061e-16	3
M_4_F_lqp_Set_6	3.23285	0	0.0416667	919.07	65.6803	1.07508e-15	2
M_4_F_lqp_Set_7	2.00207	0	0.208333	872.758	19.3683	1.22451e-05	5
M_4_F_lqp_Set_8	1.97426	0	0.208333	892.062	38.6724	7.87284e-10	6
M_4_F_lqp_Set_9	2.00187	0	0.208333	880.893	27.5026	2.0971e-07	4
M_4_F_lqpt_Set_1	1.9741	0	0.208333	888.543	35.1526	4.57539e-09	6
M_4_F_lqpt_Set_10	2.05393	0	0.166667	908.378	54.988	2.25546e-13	5
M_4_F_lqpt_Set_11	2.00223	0	0.208333	876.541	23.1514	1.84702e-06	7
M_4_F_lqpt_Set_2	2.00173	0	0.208333	883.268	29.8783	6.39355e-08	5
M_4_F_lqpt_Set_3	1.98243	0	0.208333	914.491	61.1007	1.0614e-14	4
M_4_F_lqpt_Set_4	2.05285	0	0.166667	905.955	52.5655	7.57297e-13	4
M_4_F_lqpt_Set_5	1.91884	0	0.25	924.611	71.2211	6.73386e-17	5
M_4_F_lqpt_Set_6	3.23285	0	0.0416667	919.07	65.6803	1.07508e-15	2
M_4_F_lqpt_Set_7	2.00209	0	0.208333	876.607	23.2169	1.78749e-06	7
M_4_F_lqpt_Set_8	1.97424	0	0.208333	890.188	36.7978	2.00993e-09	7
M_4_F_lqpt_Set_9	2.00187	0	0.208333	883.211	29.8212	6.57859e-08	5
M_4_F_lqpth_Set_1	1.80294	0	0.0833333	886.271	32.8811	1.42456e-08	7
M_4_F_lqpth_Set_10	2.0026	0	0	927.027	73.6373	2.01186e-17	13
M_4_F_lqpth_Set_11	2.00074	0	0.0833333	873.041	19.6514	1.06286e-05	8
M_4_F_lqpth_Set_2	2.00151	0	0.125	879.92	26.5302	3.4101e-07	6
M_4_F_lqpth_Set_3	1.99483	0	0.0833333	913.025	59.6348	2.20897e-14	5
M_4_F_lqpth_Set_4	2.00247	0	0	908.407	55.0174	2.22251e-13	7
M_4_F_lqpth_Set_5	1.61623	0	0.0416667	967.392	114.002	3.45586e-26	19
M_4_F_lqpth_Set_6	2.41341	0	0.0416667	938.476	85.0856	6.57084e-20	10
M_4_F_lqpth_Set_7	2.0006	0	0.0833333	873.09	19.7	1.03737e-05	8
M_4_F_lqpth_Set_8	1.80111	0	0.0833333	900.35	46.9605	1.24852e-11	12
M_4_F_lqpth_Set_9	2.00154	0	0.125	879.877	26.4867	3.48514e-07	6
M_4_F_lqph_Set_1	1.79442	0	0.0833333	889.165	35.7755	3.35101e-09	8
M_4_F_lqph_Set_10	2.0026	0	0	927.027	73.6373	2.01186e-17	13
M_4_F_lqph_Set_11	2.00072	0	0.0833333	873.037	19.6466	1.06542e-05	8
M_4_F_lqph_Set_2	2.00143	0	0.125	879.89	26.5005	3.46114e-07	6
M_4_F_lqph_Set_3	1.99485	0	0.0833333	910.54	57.1505	7.64984e-14	4
M_4_F_lqph_Set_4	2.00247	0	0	908.407	55.0174	2.22251e-13	7
M_4_F_lqph_Set_5	1.6098	0	0.0416667	967.392	114.002	3.45586e-26	19
M_4_F_lqph_Set_6	2.41341	0	0.0416667	938.476	85.0856	6.57084e-20	10
M_4_F_lqph_Set_7	2.00059	0	0.0833333	873.085	19.6949	1.04001e-05	8
M_4_F_lqph_Set_8	1.81924	0	0.0833333	907.956	54.5662	2.78499e-13	14
M_4_F_lqph_Set_9	2.00154	0	0.125	879.847	26.4571	3.53713e-07	6
M_5_F_lq_Set_1	2.00109	0	0.208333	887.271	33.8809	8.64129e-09	4
M_5_F_lq_Set_10	2.04052	0	0.0833333	902.275	48.8853	4.76893e-12	4
M_5_F_lq_Set_11	2.00265	0	0.208333	865.393	12.0035	0.000486627	4
M_5_F_lq_Set_2	2.00204	0	0.166667	871.08	17.6901	2.83383e-05	3
M_5_F_lq_Set_3	1.98768	0	0.208333	904.956	51.5665	1.24799e-12	3
M_5_F_lq_Set_4	2.04654	0	0.0416667	901.393	48.0029	7.41347e-12	3
M_5_F_lq_Set_5	2.00854	0	0.25	915.27	61.88	7.18884e-15	4
M_5_F_lq_Set_6	2.7397	0	0.0416667	915.914	62.5242	5.20931e-15	2
M_5_F_lq_Set_7	2.00245	0	0.208333	865.499	12.1089	0.000461653	4
M_5_F_lq_Set_8	2.00121	0	0.208333	889.425	36.0348	2.94355e-09	5
M_5_F_lq_Set_9	2.00219	0	0.166667	870.998	17.6079	2.95277e-05	3
M_5_F_lp_Set_1	1.72643	0	0.0833333	927.917	74.5267	1.28964e-17	3
M_5_F_lp_Set_10	NA	NA	0	912.069	58.6789	3.56268e-14	2
M_5_F_lp_Set_11	1.72653	0	0.0833333	912.203	58.8128	3.33184e-14	5
M_5_F_lp_Set_2	1.54989	0	0.0416667	915.59	62.2004	6.1247e-15	2
M_5_F_lp_Set_3	1.54978	0	0.0416667	939.5	86.1104	3.93631e-20	2
M_5_F_lp_Set_4	NA	NA	0	912.108	58.7179	3.49376e-14	2
M_5_F_lp_Set_5	NA	NA	0	940.189	86.7988	2.79003e-20	2
M_5_F_lp_Set_6	NA	NA	0	918.775	65.3849	1.24619e-15	1
M_5_F_lp_Set_7	1.72653	0	0.0833333	912.861	59.4715	2.39693e-14	4
M_5_F_lp_Set_8	1.72643	0	0.0833333	916.695	63.3051	3.52527e-15	4
M_5_F_lp_Set_9	1.5499	0	0.0416667	917.626	64.2363	2.21303e-15	3
M_5_F_q_Set_1	2.0436	0	0.25	929.746	76.3559	5.16725e-18	2
M_5_F_q_Set_10	1.99107	0	0.25	933.709	80.3188	7.12393e-19	3
M_5_F_q_Set_11	2.04482	0	0.25	921.82	68.4301	2.71845e-16	4
M_5_F_q_Set_2	2.30439	0	0.208333	922.216	68.8261	2.23011e-16	2
M_5_F_q_Set_3	2.07268	0	0.208333	928.496	75.1059	9.65379e-18	2
M_5_F_q_Set_4	1.9907	0	0.25	933.351	79.9614	8.51768e-19	2
M_5_F_q_Set_5	1.99039	0	0.25	937.234	83.8444	1.22223e-19	2
M_5_F_q_Set_6	NA	NA	0	937.613	84.2234	1.01121e-19	2
M_5_F_q_Set_7	2.04447	0	0.25	919.57	66.1804	8.37205e-16	3
M_5_F_q_Set_8	2.04298	0	0.25	926.583	73.1929	2.51241e-17	3
M_5_F_q_Set_9	2.07259	0	0.208333	923.96	70.5703	9.32362e-17	3
M_5_F_qp_Set_1	2.02944	0	0.166667	927.628	74.2384	1.48962e-17	2
M_5_F_qp_Set_10	NA	NA	0	941.816	88.4257	1.23688e-20	2
M_5_F_qp_Set_11	2.03029	0	0.166667	915.315	61.9249	7.02938e-15	4
M_5_F_qp_Set_2	1.99641	0	0.208333	924.204	70.8143	8.25295e-17	3
M_5_F_qp_Set_3	1.96885	0	0.208333	938.535	85.1447	6.37964e-20	2
M_5_F_qp_Set_4	NA	NA	0	947.165	93.7746	8.52757e-22	3
M_5_F_qp_Set_5	NA	NA	0	946.913	93.5235	9.66839e-22	1
M_5_F_qp_Set_6	NA	NA	0	944.002	90.6124	4.14465e-21	2
M_5_F_qp_Set_7	2.02972	0	0.166667	915.324	61.9342	6.99652e-15	4
M_5_F_qp_Set_8	2.02926	0	0.166667	927.621	74.2306	1.49543e-17	2
M_5_F_qp_Set_9	1.97251	0	0.208333	924.196	70.8065	8.28502e-17	3
M_5_F_lqp_Set_1	1.9997	0	0.208333	900.996	47.6065	9.03881e-12	5
M_5_F_lqp_Set_10	NA	NA	0	913.02	59.6302	2.2141e-14	3
M_5_F_lqp_Set_11	2.00009	0	0.208333	880.45	27.0601	2.61633e-07	5
M_5_F_lqp_Set_2	1.9703	0	0.25	888.368	34.9784	4.99197e-09	4
M_5_F_lqp_Set_3	1.9702	0	0.25	917.414	64.0239	2.46106e-15	2
M_5_F_lqp_Set_4	NA	NA	0	913.059	59.6687	2.17183e-14	3
M_5_F_lqp_Set_5	NA	NA	0	930.962	77.5724	2.81249e-18	3
M_5_F_lqp_Set_6	NA	NA	0	918.775	65.3849	1.24619e-15	1
M_5_F_lqp_Set_7	1.99991	0	0.208333	880.504	27.1145	2.54623e-07	5
M_5_F_lqp_Set_8	1.99976	0	0.208333	903.584	50.1945	2.47821e-12	6
M_5_F_lqp_Set_9	1.97	0	0.25	888.319	34.9291	5.11643e-09	4
M_5_F_lqpt_Set_1	2.0112	0	0.291667	898.746	45.3565	2.78416e-11	6
M_5_F_lqpt_Set_10	NA	NA	0	912.181	58.7914	3.36781e-14	4
M_5_F_lqpt_Set_11	2.00015	0	0.208333	882.627	29.237	8.81032e-08	6
M_5_F_lqpt_Set_2	1.97014	0	0.25	888.268	34.8782	5.24847e-09	4
M_5_F_lqpt_Set_3	1.97001	0	0.25	914.826	61.4365	8.97334e-15	2
M_5_F_lqpt_Set_4	NA	NA	0	912.218	58.8278	3.30693e-14	4
M_5_F_lqpt_Set_5	NA	NA	0	933.013	79.6231	1.00878e-18	5
M_5_F_lqpt_Set_6	NA	NA	0	918.775	65.3849	1.24619e-15	1
M_5_F_lqpt_Set_7	1.99994	0	0.208333	882.683	29.2928	8.56788e-08	6
M_5_F_lqpt_Set_8	1.99983	0	0.208333	898.733	45.3435	2.80233e-11	6
M_5_F_lqpt_Set_9	1.97054	0	0.25	888.221	34.8309	5.37401e-09	4
M_5_F_lqpth_Set_1	1.79436	0	0.0416667	888.943	35.5527	3.74587e-09	6
M_5_F_lqpth_Set_10	1.94103	0	0	905.397	52.0073	1.0011e-12	5
M_5_F_lqpth_Set_11	1.81954	0	0.0416667	879.416	26.0258	4.3884e-07	8
M_5_F_lqpth_Set_2	2.00026	0	0.0833333	882.238	28.8481	1.07016e-07	5
M_5_F_lqpth_Set_3	1.98717	0	0.0416667	913.835	60.4453	1.473e-14	4
M_5_F_lqpth_Set_4	1.94082	0	0	905.431	52.0413	9.84263e-13	5
M_5_F_lqpth_Set_5	1.34165	0	0.0416667	967.137	113.747	3.92463e-26	18
M_5_F_lqpth_Set_6	2.16585	0	0.0416667	929.989	76.5989	4.57593e-18	6
M_5_F_lqpth_Set_7	1.80002	0	0.0416667	879.457	26.0671	4.29864e-07	8
M_5_F_lqpth_Set_8	1.76748	0	0.0416667	886.327	32.9366	1.38558e-08	5
M_5_F_lqpth_Set_9	2.00035	0	0.0833333	882.201	28.811	1.09016e-07	5
M_5_F_lqph_Set_1	1.78294	0	0.0416667	891.666	38.2765	9.59589e-10	7
M_5_F_lqph_Set_10	1.94104	0	0	905.397	52.0073	1.0011e-12	5
M_5_F_lqph_Set_11	1.80762	0	0.0416667	879.421	26.0307	4.37756e-07	8
M_5_F_lqph_Set_2	2.00025	0	0.0833333	884.794	31.4036	2.98217e-08	6
M_5_F_lqph_Set_3	1.98712	0	0.0416667	921.633	68.2432	2.98467e-16	7
M_5_F_lqph_Set_4	1.94079	0	0	905.431	52.0413	9.84263e-13	5
M_5_F_lqph_Set_5	1.34044	0	0.0416667	967.137	113.747	3.92463e-26	18
M_5_F_lqph_Set_6	2.16629	0	0.0416667	929.989	76.5989	4.57593e-18	6
M_5_F_lqph_Set_7	1.78912	0	0.0416667	879.462	26.0721	4.28782e-07	8
M_5_F_lqph_Set_8	1.79233	0	0.0416667	891.653	38.2629	9.66139e-10	7
M_5_F_lqph_Set_9	2.00023	0	0.0833333	884.756	31.3665	3.03802e-08	6
M_6_F_lq_Set_1	2.00055	0	0.208333	889.987	36.5967	2.22254e-09	4
M_6_F_lq_Set_10	2.04005	0	0.0416667	904.259	50.8691	1.76867e-12	4
M_6_F_lq_Set_11	2.00277	0	0.208333	867.631	14.2407	0.000159	4
M_6_F_lq_Set_2	2.00183	0	0.166667	873.261	19.8708	9.52427e-06	3
M_6_F_lq_Set_3	1.98638	0	0.208333	907.187	53.7973	4.09071e-13	3
M_6_F_lq_Set_4	2.04085	0	0.0416667	903.098	49.7082	3.16037e-12	3
M_6_F_lq_Set_5	1.92789	0	0.208333	917.714	64.3237	2.11846e-15	4
M_6_F_lq_Set_6	2.52826	0	0.0416667	916.627	63.2367	3.64804e-15	2
M_6_F_lq_Set_7	2.00264	0	0.208333	867.727	14.3371	0.000151521	4
M_6_F_lq_Set_8	2.00068	0	0.208333	889.97	36.5803	2.24088e-09	4
M_6_F_lq_Set_9	2.00194	0	0.166667	873.185	19.7948	9.89315e-06	3
M_6_F_lp_Set_1	NA	NA	0	929.584	76.1941	5.60255e-18	3
M_6_F_lp_Set_10	NA	NA	0	914.819	61.4291	9.00671e-15	2
M_6_F_lp_Set_11	NA	NA	0	915.603	62.2134	6.08486e-15	4
M_6_F_lp_Set_2	NA	NA	0	917.761	64.3706	2.06936e-15	2
M_6_F_lp_Set_3	NA	NA	0	938.828	85.4377	5.51019e-20	1
M_6_F_lp_Set_4	NA	NA	0	914.851	61.4614	8.86263e-15	2
M_6_F_lp_Set_5	NA	NA	0	939.012	85.6219	5.02547e-20	1
M_6_F_lp_Set_6	NA	NA	0	920.768	67.3776	4.60119e-16	1
M_6_F_lp_Set_7	NA	NA	0	915.628	62.2385	6.00904e-15	4
M_6_F_lp_Set_8	NA	NA	0	925.199	71.8091	5.0186e-17	4
M_6_F_lp_Set_9	NA	NA	0	917.738	64.3477	2.09312e-15	2
M_6_F_q_Set_1	2.03552	0	0.25	930.869	77.479	2.947e-18	2
M_6_F_q_Set_10	1.98109	0	0.25	935.188	81.7984	3.39961e-19	3
M_6_F_q_Set_11	2.03638	0	0.25	923.627	70.2371	1.1014e-16	4
M_6_F_q_Set_2	2.21112	0	0.208333	923.586	70.196	1.12426e-16	2
M_6_F_q_Set_3	2.04492	0	0.208333	929.578	76.1877	5.62058e-18	2
M_6_F_q_Set_4	1.98089	0	0.25	934.698	81.3078	4.34483e-19	2
M_6_F_q_Set_5	1.98023	0	0.25	938.53	85.1399	6.39504e-20	2
M_6_F_q_Set_6	NA	NA	0	938.384	84.9937	6.87992e-20	2
M_6_F_q_Set_7	2.0365	0	0.25	921.399	68.0088	3.3559e-16	3
M_6_F_q_Set_8	2.03572	0	0.25	928.093	74.7026	1.18102e-17	3
M_6_F_q_Set_9	2.04607	0	0.208333	925.302	71.9124	4.76591e-17	3
M_6_F_qp_Set_1	NA	NA	0	931.559	78.1691	2.08704e-18	2
M_6_F_qp_Set_10	NA	NA	0	945.525	92.1346	1.93621e-21	1
M_6_F_qp_Set_11	NA	NA	0	924.349	70.9595	7.67497e-17	4
M_6_F_qp_Set_2	NA	NA	0	928.895	75.5046	7.9087e-18	2
M_6_F_qp_Set_3	NA	NA	0	939.126	85.7358	4.74713e-20	1
M_6_F_qp_Set_4	NA	NA	0	945.532	92.142	1.92908e-21	1
M_6_F_qp_Set_5	NA	NA	0	944.979	91.589	2.54353e-21	0
M_6_F_qp_Set_6	NA	NA	0	944.979	91.589	2.54353e-21	0
M_6_F_qp_Set_7	NA	NA	0	924.357	70.9674	7.64449e-17	4
M_6_F_qp_Set_8	NA	NA	0	931.552	78.1617	2.09478e-18	2
M_6_F_qp_Set_9	NA	NA	0	928.887	75.4972	7.93821e-18	2
M_6_F_lqp_Set_1	NA	NA	0	910.988	57.5977	6.11707e-14	5
M_6_F_lqp_Set_10	NA	NA	0	914.819	61.4291	9.00671e-15	2
M_6_F_lqp_Set_11	NA	NA	0	889.007	35.6171	3.62728e-09	5
M_6_F_lqp_Set_2	NA	NA	0	893.36	39.9696	4.11568e-10	3
M_6_F_lqp_Set_3	NA	NA	0	922.539	69.1486	1.89806e-16	2
M_6_F_lqp_Set_4	NA	NA	0	914.851	61.4614	8.86263e-15	2
M_6_F_lqp_Set_5	NA	NA	0	935.204	81.8145	3.37231e-19	2
M_6_F_lqp_Set_6	NA	NA	0	920.768	67.3776	4.60119e-16	1
M_6_F_lqp_Set_7	NA	NA	0	889.051	35.6606	3.54916e-09	5
M_6_F_lqp_Set_8	NA	NA	0	910.977	57.5874	6.14856e-14	5
M_6_F_lqp_Set_9	NA	NA	0	893.32	39.9304	4.19708e-10	3
M_6_F_lqpt_Set_1	NA	NA	0	905.676	52.286	8.70891e-13	5
M_6_F_lqpt_Set_10	NA	NA	0	915.992	62.6019	5.01063e-15	3
M_6_F_lqpt_Set_11	NA	NA	0	891.156	37.766	1.23866e-09	6
M_6_F_lqpt_Set_2	NA	NA	0	895.609	42.2193	1.33636e-10	4
M_6_F_lqpt_Set_3	NA	NA	0	919.322	65.9316	9.48111e-16	2
M_6_F_lqpt_Set_4	NA	NA	0	916.024	62.6336	4.93196e-15	3
M_6_F_lqpt_Set_5	NA	NA	0	935.319	81.9292	3.18444e-19	3
M_6_F_lqpt_Set_6	NA	NA	0	920.768	67.3776	4.60119e-16	1
M_6_F_lqpt_Set_7	NA	NA	0	891.201	37.8105	1.21136e-09	6
M_6_F_lqpt_Set_8	NA	NA	0	905.664	52.2742	8.76073e-13	5
M_6_F_lqpt_Set_9	NA	NA	0	895.568	42.1782	1.36411e-10	4
M_6_F_lqpth_Set_1	1.79348	0	0.0416667	894.389	40.9987	2.46026e-10	6
M_6_F_lqpth_Set_10	1.44367	0	0.0416667	908.134	54.7438	2.54842e-13	5
M_6_F_lqpth_Set_11	1.77976	0	0.0416667	883.291	29.9012	6.32084e-08	7
M_6_F_lqpth_Set_2	1.988	0	0.0416667	893.17	39.7803	4.52428e-10	7
M_6_F_lqpth_Set_3	1.41037	0	0.0416667	917.415	64.0253	2.45926e-15	4
M_6_F_lqpth_Set_4	1.42529	0	0.0416667	908.163	54.7731	2.51136e-13	5
M_6_F_lqpth_Set_5	1.4679	0	0.0416667	921.094	67.704	3.90842e-16	3
M_6_F_lqpth_Set_6	1.98441	0	0.0416667	920.768	67.3776	4.60119e-16	1
M_6_F_lqpth_Set_7	1.79627	0	0.0416667	883.323	29.9329	6.2214e-08	7
M_6_F_lqpth_Set_8	1.78855	0	0.0416667	894.376	40.9858	2.47608e-10	6
M_6_F_lqpth_Set_9	1.98809	0	0.0416667	893.14	39.7497	4.59395e-10	7
M_6_F_lqph_Set_1	1.77356	0	0.0416667	894.361	40.9706	2.49507e-10	6
M_6_F_lqph_Set_10	1.43931	0	0.0416667	908.134	54.7438	2.54842e-13	5
M_6_F_lqph_Set_11	1.81081	0	0.0416667	883.252	29.8618	6.44652e-08	7
M_6_F_lqph_Set_2	1.98811	0	0.0416667	890.572	37.182	1.65865e-09	6
M_6_F_lqph_Set_3	1.41035	0	0.0416667	917.396	64.0059	2.48327e-15	4
M_6_F_lqph_Set_4	1.44586	0	0.0416667	908.163	54.7731	2.51136e-13	5
M_6_F_lqph_Set_5	1.46291	0	0.0416667	921.094	67.704	3.90842e-16	3
M_6_F_lqph_Set_6	1.98445	0	0.0416667	920.768	67.3776	4.60119e-16	1
M_6_F_lqph_Set_7	1.77866	0	0.0416667	883.286	29.8963	6.33613e-08	7
M_6_F_lqph_Set_8	1.79751	0	0.0416667	894.348	40.9578	2.51108e-10	6
M_6_F_lqph_Set_9	1.98799	0	0.0416667	890.542	37.1516	1.68406e-09	6

## Sheet: 50km-PC_2
Model	Mean_AUC_ratio	pval_pROC	Omission_rate_at_5%	AICc	delta_AICc	W_AICc	N_parameters
M_0.1_F_lq_Set_1	1.7326	0	0.25	879.831	26.4415	3.56469e-07	4
M_0.1_F_lq_Set_10	2.1806	0	0.0416667	900.988	47.5979	9.07784e-12	6
M_0.1_F_lq_Set_11	2.18124	0	0.0833333	864.963	11.5732	0.000603448	8
M_0.1_F_lq_Set_2	2.14848	0	0.0833333	865.878	12.4885	0.000381849	4
M_0.1_F_lq_Set_3	2.05312	0	0.125	901.294	47.9039	7.78999e-12	4
M_0.1_F_lq_Set_4	2.13544	0	0.0416667	898.784	45.3939	2.73261e-11	4
M_0.1_F_lq_Set_5	1.68365	0	0.0833333	909.09	55.6998	1.58001e-13	4
M_0.1_F_lq_Set_6	2.3377	0	0.125	918.477	65.0875	1.44594e-15	4
M_0.1_F_lq_Set_7	2.15609	0	0.0833333	862.391	9.00077	0.00218392	6
M_0.1_F_lq_Set_8	1.79505	0	0.291667	883.627	30.2375	5.34254e-08	6
M_0.1_F_lq_Set_9	2.18989	0	0.125	868.326	14.9365	0.000112284	6
M_0.1_F_lp_Set_1	1.48602	0	0.25	924.445	71.0554	7.31564e-17	3
M_0.1_F_lp_Set_10	2.15127	0	0.291667	906.794	53.4043	4.97894e-13	6
M_0.1_F_lp_Set_11	3.0887	0	0.333333	899.818	46.4276	1.62969e-11	10
M_0.1_F_lp_Set_2	3.17815	0	0.0833333	911.322	57.9317	5.17634e-14	3
M_0.1_F_lp_Set_3	2	0	0.208333	927.456	74.0659	1.62377e-17	3
M_0.1_F_lp_Set_4	2.4448	0	0.375	908.169	54.7786	2.50447e-13	3
M_0.1_F_lp_Set_5	1.67729	0	0.166667	923.459	70.0694	1.19772e-16	3
M_0.1_F_lp_Set_6	4.398	0	0.0416667	916.573	63.1834	3.74643e-15	3
M_0.1_F_lp_Set_7	2.96397	0	0.333333	906.23	52.8401	6.60158e-13	6
M_0.1_F_lp_Set_8	1.99944	0	0.208333	901.37	47.9798	7.49985e-12	6
M_0.1_F_lp_Set_9	2.08295	0	0.125	914.988	61.5984	8.2756e-15	6
M_0.1_F_q_Set_1	2.02744	0	0.0833333	926.973	73.5831	2.06715e-17	2
M_0.1_F_q_Set_10	2.00877	0	0	930.392	77.002	3.74068e-18	3
M_0.1_F_q_Set_11	2.03182	0	0.0416667	917.727	64.3374	2.104e-15	4
M_0.1_F_q_Set_2	18.174	0	0.0416667	919.245	65.8548	9.85214e-16	2
M_0.1_F_q_Set_3	2.20298	0	0.0416667	926.082	72.6919	3.22767e-17	2
M_0.1_F_q_Set_4	2.03886	0	0	930.121	76.7309	4.28372e-18	2
M_0.1_F_q_Set_5	2.0041	0	0.0416667	934.155	80.7649	5.69966e-19	2
M_0.1_F_q_Set_6	20.8275	0	0.125	936.099	82.7091	2.15619e-19	2
M_0.1_F_q_Set_7	2.05443	0	0.0416667	915.526	62.1361	6.32481e-15	3
M_0.1_F_q_Set_8	2.02449	0	0.0416667	923.171	69.7806	1.3838e-16	3
M_0.1_F_q_Set_9	2.23031	0	0.0416667	921.019	67.6294	4.05686e-16	3
M_0.1_F_qp_Set_1	1.99987	0	0	908.116	54.7263	2.57083e-13	3
M_0.1_F_qp_Set_10	2.00013	0	0	925.842	72.4523	3.6384e-17	6
M_0.1_F_qp_Set_11	1.99928	0	0.0416667	883.619	30.2289	5.36533e-08	9
M_0.1_F_qp_Set_2	2.00151	0	0.0416667	904.107	50.717	1.90837e-12	3
M_0.1_F_qp_Set_3	2.29707	0	0.0833333	926.604	73.2141	2.48596e-17	3
M_0.1_F_qp_Set_4	2.01137	0	0	932.075	78.685	1.61248e-18	3
M_0.1_F_qp_Set_5	2.00338	0	0.0416667	935.475	82.0846	2.94629e-19	3
M_0.1_F_qp_Set_6	6.74641	0	0.0416667	935.726	82.3365	2.59765e-19	3
M_0.1_F_qp_Set_7	1.99831	0	0	886.474	33.0841	1.28707e-08	6
M_0.1_F_qp_Set_8	2.36436	0	0.0416667	907.721	54.331	3.13259e-13	6
M_0.1_F_qp_Set_9	2.00086	0	0.0416667	899.613	46.2227	1.80551e-11	5
M_0.1_F_lqp_Set_1	2.07424	0	0.125	865.308	11.9177	0.000507975	5
M_0.1_F_lqp_Set_10	1.87496	0	0.0833333	887.836	34.4465	6.5127e-09	9
M_0.1_F_lqp_Set_11	2.22748	0	0.0833333	859.675	6.28494	0.00849125	13
M_0.1_F_lqp_Set_2	2.08549	0	0.0833333	864.78	11.3904	0.000661202	5
M_0.1_F_lqp_Set_3	1.88848	0	0.125	895.898	42.5076	1.15699e-10	4
M_0.1_F_lqp_Set_4	2.1584	0	0.166667	901.259	47.8693	7.92574e-12	5
M_0.1_F_lqp_Set_5	1.75384	0	0.0833333	892.792	39.402	5.46619e-10	5
M_0.1_F_lqp_Set_6	2.36388	0	0.166667	920.899	67.5091	4.30834e-16	5
M_0.1_F_lqp_Set_7	2.31929	0	0.125	854.871	1.48119	0.093776	9
M_0.1_F_lqp_Set_8	2.24694	0	0.0833333	861.161	7.77117	0.00403869	9
M_0.1_F_lqp_Set_9	2.11687	0	0.0833333	869.879	16.4895	5.1652e-05	8
M_0.1_F_lqpt_Set_1	3.22841	0	0.833333	NA	NA	NA	69
M_0.1_F_lqpt_Set_10	2.74018	0	1	NA	NA	NA	82
M_0.1_F_lqpt_Set_11	2.75706	0	1	NA	NA	NA	105
M_0.1_F_lqpt_Set_2	1.94331	0	0.625	NA	NA	NA	71
M_0.1_F_lqpt_Set_3	2.39925	0	0.875	NA	NA	NA	72
M_0.1_F_lqpt_Set_4	2.68315	0	0.833333	NA	NA	NA	64
M_0.1_F_lqpt_Set_5	2.69575	0	1	NA	NA	NA	72
M_0.1_F_lqpt_Set_6	2.79815	0	0.875	NA	NA	NA	62
M_0.1_F_lqpt_Set_7	3.11168	0	0.958333	NA	NA	NA	93
M_0.1_F_lqpt_Set_8	3.21247	0	1	NA	NA	NA	93
M_0.1_F_lqpt_Set_9	2.02725	0	1	NA	NA	NA	90
M_0.1_F_lqpth_Set_1	1.75675	0	0.958333	NA	NA	NA	77
M_0.1_F_lqpth_Set_10	2.23516	0	1	NA	NA	NA	91
M_0.1_F_lqpth_Set_11	3.59091	0	1	NA	NA	NA	114
M_0.1_F_lqpth_Set_2	1.84	0	0.75	NA	NA	NA	78
M_0.1_F_lqpth_Set_3	1.78899	0	0.875	NA	NA	NA	78
M_0.1_F_lqpth_Set_4	1.87319	0	0.875	NA	NA	NA	73
M_0.1_F_lqpth_Set_5	1.82153	0	0.916667	NA	NA	NA	72
M_0.1_F_lqpth_Set_6	2.63155	0	0.875	NA	NA	NA	71
M_0.1_F_lqpth_Set_7	2.91047	0	0.958333	NA	NA	NA	110
M_0.1_F_lqpth_Set_8	2.603	0	1	NA	NA	NA	104
M_0.1_F_lqpth_Set_9	2.08742	0	0.958333	NA	NA	NA	96
M_0.1_F_lqph_Set_1	2.16797	0	0.416667	NA	NA	NA	90
M_0.1_F_lqph_Set_10	2.23214	0	0.333333	NA	NA	NA	117
M_0.1_F_lqph_Set_11	2.28236	0	0.583333	NA	NA	NA	151
M_0.1_F_lqph_Set_2	2.06855	0	0.166667	NA	NA	NA	95
M_0.1_F_lqph_Set_3	1.92466	0	0.375	NA	NA	NA	116
M_0.1_F_lqph_Set_4	1.80479	0	0.291667	NA	NA	NA	119
M_0.1_F_lqph_Set_5	2.23941	0	0.291667	NA	NA	NA	142
M_0.1_F_lqph_Set_6	4.28325	0	0.166667	NA	NA	NA	136
M_0.1_F_lqph_Set_7	2.25127	0	0.458333	NA	NA	NA	116
M_0.1_F_lqph_Set_8	2.3373	0	0.5	NA	NA	NA	116
M_0.1_F_lqph_Set_9	1.93187	0	0.333333	NA	NA	NA	142
M_0.25_F_lq_Set_1	1.704	0	0.25	879.854	26.464	3.52489e-07	4
M_0.25_F_lq_Set_10	2.16325	0	0.0416667	901.025	47.6346	8.91264e-12	6
M_0.25_F_lq_Set_11	2.12551	0	0.0833333	865.009	11.6188	0.000589857	8
M_0.25_F_lq_Set_2	2.10911	0	0.0833333	865.922	12.5321	0.000373613	4
M_0.25_F_lq_Set_3	2.03975	0	0.125	898.939	45.5487	2.52909e-11	3
M_0.25_F_lq_Set_4	2.13389	0	0.0416667	898.809	45.4189	2.69867e-11	4
M_0.25_F_lq_Set_5	1.64924	0	0.125	909.108	55.7181	1.56565e-13	4
M_0.25_F_lq_Set_6	2.33251	0	0.125	918.495	65.1051	1.43332e-15	4
M_0.25_F_lq_Set_7	2.11297	0	0.0833333	862.436	9.04654	0.00213451	6
M_0.25_F_lq_Set_8	1.81001	0	0.291667	883.653	30.263	5.27481e-08	6
M_0.25_F_lq_Set_9	2.15124	0	0.125	868.367	14.9772	0.000110022	6
M_0.25_F_lp_Set_1	1.49705	0	0.25	924.46	71.0703	7.26127e-17	3
M_0.25_F_lp_Set_10	2.05663	0	0.291667	904.29	50.9002	1.74141e-12	5
M_0.25_F_lp_Set_11	2.84034	0	0.333333	900.291	46.9006	1.28647e-11	10
M_0.25_F_lp_Set_2	2.98478	0	0.0833333	911.379	57.9888	5.03055e-14	3
M_0.25_F_lp_Set_3	2.00039	0	0.208333	927.52	74.1299	1.57259e-17	3
M_0.25_F_lp_Set_4	2.31713	0	0.375	908.224	54.8338	2.4363e-13	3
M_0.25_F_lp_Set_5	1.7758	0	0.166667	923.52	70.1296	1.16218e-16	3
M_0.25_F_lp_Set_6	4.1973	0	0.0416667	914.373	60.9828	1.12585e-14	2
M_0.25_F_lp_Set_7	2.94808	0	0.333333	906.321	52.9311	6.30795e-13	6
M_0.25_F_lp_Set_8	2.00037	0	0.25	901.495	48.1049	7.04516e-12	6
M_0.25_F_lp_Set_9	2.06367	0	0.125	915.051	61.6611	8.0205e-15	6
M_0.25_F_q_Set_1	2.02992	0	0.0833333	926.98	73.5897	2.06031e-17	2
M_0.25_F_q_Set_10	2.00695	0	0	930.404	77.0136	3.71916e-18	3
M_0.25_F_q_Set_11	2.03195	0	0.0416667	917.738	64.3485	2.09236e-15	4
M_0.25_F_q_Set_2	17.0608	0	0.0416667	919.251	65.8609	9.82222e-16	2
M_0.25_F_q_Set_3	2.19888	0	0.0416667	926.091	72.7006	3.2136e-17	2
M_0.25_F_q_Set_4	2.03705	0	0	930.132	76.7421	4.25981e-18	2
M_0.25_F_q_Set_5	2.00343	0	0.0416667	934.164	80.774	5.67371e-19	2
M_0.25_F_q_Set_6	21.1629	0	0.125	936.107	82.7175	2.14712e-19	2
M_0.25_F_q_Set_7	2.04792	0	0.0416667	915.534	62.1444	6.29849e-15	3
M_0.25_F_q_Set_8	2.02984	0	0.0416667	923.181	69.7906	1.3769e-16	3
M_0.25_F_q_Set_9	2.22039	0	0.0416667	921.031	67.6408	4.03384e-16	3
M_0.25_F_qp_Set_1	1.99896	0	0	908.363	54.9732	2.27226e-13	3
M_0.25_F_qp_Set_10	2.00039	0	0	926.2	72.8105	3.04182e-17	6
M_0.25_F_qp_Set_11	1.99736	0	0.0416667	881.462	28.0718	1.57767e-07	8
M_0.25_F_qp_Set_2	2.00116	0	0.0416667	904.161	50.7711	1.85751e-12	3
M_0.25_F_qp_Set_3	2.23894	0	0.0833333	926.643	73.2526	2.43848e-17	3
M_0.25_F_qp_Set_4	2.01286	0	0	932.118	78.7282	1.57804e-18	3
M_0.25_F_qp_Set_5	2.00327	0	0.0416667	935.522	82.1325	2.87663e-19	3
M_0.25_F_qp_Set_6	7.81424	0	0.0416667	935.753	82.363	2.56349e-19	3
M_0.25_F_qp_Set_7	1.99754	0	0	884.32	30.9303	3.77825e-08	5
M_0.25_F_qp_Set_8	2.27922	0	0.0416667	908.005	54.6149	2.71808e-13	6
M_0.25_F_qp_Set_9	2.00043	0	0.0416667	902.397	49.0068	4.48793e-12	6
M_0.25_F_lqp_Set_1	1.99667	0	0.125	865.675	12.2855	0.000422642	5
M_0.25_F_lqp_Set_10	1.95207	0	0.0833333	888.623	35.2335	4.39416e-09	9
M_0.25_F_lqp_Set_11	2.06503	0	0.0833333	856.64	3.25048	0.0387165	12
M_0.25_F_lqp_Set_2	2.05281	0	0.0833333	864.991	11.6007	0.000595211	5
M_0.25_F_lqp_Set_3	2.06338	0	0.125	898.684	45.2939	2.87261e-11	5
M_0.25_F_lqp_Set_4	2.10843	0	0.166667	898.919	45.5288	2.55429e-11	4
M_0.25_F_lqp_Set_5	1.67367	0	0.0833333	893.324	39.9345	4.18855e-10	5
M_0.25_F_lqp_Set_6	2.40266	0	0.166667	918.576	65.1864	1.37623e-15	4
M_0.25_F_lqp_Set_7	2.10034	0	0.0833333	855.644	2.25389	0.0637239	9
M_0.25_F_lqp_Set_8	2.08562	0	0.166667	861.851	8.46083	0.00286077	9
M_0.25_F_lqp_Set_9	2.05068	0	0.0833333	867.304	13.9138	0.000187232	7
M_0.25_F_lqpt_Set_1	2.75653	0	0.666667	1456.45	603.061	2.19123e-132	42
M_0.25_F_lqpt_Set_10	2.25302	0	0.416667	NA	NA	NA	65
M_0.25_F_lqpt_Set_11	2.86437	0	0.666667	NA	NA	NA	79
M_0.25_F_lqpt_Set_2	2.03178	0	0.333333	NA	NA	NA	52
M_0.25_F_lqpt_Set_3	2.08875	0	0.416667	2250.68	1397.29	7.5027e-305	45
M_0.25_F_lqpt_Set_4	2.59719	0	0.416667	1296.11	442.718	1.44125e-97	40
M_0.25_F_lqpt_Set_5	2.04183	0	0.375	NA	NA	NA	48
M_0.25_F_lqpt_Set_6	2.81307	0	0.291667	3046.4	2193.01	0	46
M_0.25_F_lqpt_Set_7	3.16632	0	0.75	NA	NA	NA	68
M_0.25_F_lqpt_Set_8	3.28468	0	0.583333	NA	NA	NA	58
M_0.25_F_lqpt_Set_9	2.15841	0	0.458333	NA	NA	NA	63
M_0.25_F_lqpth_Set_1	2.55168	0	0.625	NA	NA	NA	51
M_0.25_F_lqpth_Set_10	2.1889	0	0.375	NA	NA	NA	74
M_0.25_F_lqpth_Set_11	2.89603	0	0.75	NA	NA	NA	86
M_0.25_F_lqpth_Set_2	2.20704	0	0.541667	NA	NA	NA	54
M_0.25_F_lqpth_Set_3	1.96809	0	0.5	NA	NA	NA	50
M_0.25_F_lqpth_Set_4	1.62999	0	0.458333	NA	NA	NA	48
M_0.25_F_lqpth_Set_5	2.22492	0	0.416667	NA	NA	NA	51
M_0.25_F_lqpth_Set_6	2.24655	0	0.291667	NA	NA	NA	50
M_0.25_F_lqpth_Set_7	3.00515	0	0.75	NA	NA	NA	72
M_0.25_F_lqpth_Set_8	2.81686	0	0.625	NA	NA	NA	66
M_0.25_F_lqpth_Set_9	1.90553	0	0.583333	NA	NA	NA	69
M_0.25_F_lqph_Set_1	1.96364	0	0.375	NA	NA	NA	63
M_0.25_F_lqph_Set_10	2.00132	0	0.291667	NA	NA	NA	90
M_0.25_F_lqph_Set_11	2.31524	0	0.416667	NA	NA	NA	100
M_0.25_F_lqph_Set_2	2.23096	0	0.125	1041.73	188.335	2.49613e-42	32
M_0.25_F_lqph_Set_3	2.25538	0	0.208333	NA	NA	NA	75
M_0.25_F_lqph_Set_4	2.37145	0	0.291667	NA	NA	NA	53
M_0.25_F_lqph_Set_5	1.84824	0	0.291667	NA	NA	NA	99
M_0.25_F_lqph_Set_6	2.96502	0	0.166667	NA	NA	NA	103
M_0.25_F_lqph_Set_7	2.82582	0	0.375	NA	NA	NA	82
M_0.25_F_lqph_Set_8	2.28562	0	0.416667	NA	NA	NA	87
M_0.25_F_lqph_Set_9	2.25287	0	0.125	NA	NA	NA	96
M_0.5_F_lq_Set_1	1.70787	0	0.25	879.932	26.5418	3.39048e-07	4
M_0.5_F_lq_Set_10	2.11706	0	0.0416667	901.164	47.7742	8.31156e-12	6
M_0.5_F_lq_Set_11	2.05702	0	0.0833333	862.285	8.8953	0.00230218	7
M_0.5_F_lq_Set_2	2.06592	0	0.0833333	866.072	12.6822	0.000346597	4
M_0.5_F_lq_Set_3	2.02712	0	0.125	899.005	45.6153	2.44622e-11	3
M_0.5_F_lq_Set_4	2.10275	0	0.0416667	898.904	45.5138	2.57358e-11	4
M_0.5_F_lq_Set_5	1.67493	0	0.125	909.169	55.7795	1.51834e-13	4
M_0.5_F_lq_Set_6	2.42701	0	0.166667	918.565	65.1751	1.38399e-15	4
M_0.5_F_lq_Set_7	2.05701	0	0.0833333	862.594	9.20415	0.00197276	6
M_0.5_F_lq_Set_8	1.7919	0	0.291667	883.74	30.3495	5.05136e-08	6
M_0.5_F_lq_Set_9	2.0971	0	0.125	865.908	12.5185	0.000376165	5
M_0.5_F_lp_Set_1	1.964	0	0.25	924.496	71.1063	7.13178e-17	3
M_0.5_F_lp_Set_10	2.03681	0	0.333333	902.02	48.6303	5.4173e-12	4
M_0.5_F_lp_Set_11	2.61314	0	0.333333	898.422	45.0324	3.27394e-11	9
M_0.5_F_lp_Set_2	2.82476	0	0.0833333	911.589	58.199	4.52882e-14	3
M_0.5_F_lp_Set_3	1.99974	0	0.25	927.733	74.3435	1.41331e-17	3
M_0.5_F_lp_Set_4	2.23022	0	0.375	908.414	55.0236	2.21564e-13	3
M_0.5_F_lp_Set_5	1.77898	0	0.208333	923.717	70.3269	1.05303e-16	3
M_0.5_F_lp_Set_6	4.08964	0	0.0416667	914.429	61.0392	1.09455e-14	2
M_0.5_F_lp_Set_7	2.81807	0	0.375	906.653	53.2629	5.34355e-13	6
M_0.5_F_lp_Set_8	1.98375	0	0.291667	901.907	48.5171	5.7329e-12	6
M_0.5_F_lp_Set_9	2.07902	0	0.125	910.165	56.7748	9.23092e-14	4
M_0.5_F_q_Set_1	2.02871	0	0.0833333	927.003	73.6132	2.03621e-17	2
M_0.5_F_q_Set_10	2.00593	0	0	930.436	77.0457	3.6598e-18	3
M_0.5_F_q_Set_11	2.02668	0	0.0416667	917.774	64.3838	2.05577e-15	4
M_0.5_F_q_Set_2	14.7953	0	0.0416667	919.273	65.8827	9.71596e-16	2
M_0.5_F_q_Set_3	2.1654	0	0.0833333	926.114	72.724	3.17617e-17	2
M_0.5_F_q_Set_4	2.04247	0	0	930.165	76.7746	4.19122e-18	2
M_0.5_F_q_Set_5	2.00484	0	0.0416667	934.192	80.802	5.59509e-19	2
M_0.5_F_q_Set_6	23.9472	0	0.125	936.126	82.7355	2.12782e-19	2
M_0.5_F_q_Set_7	2.04298	0	0.0416667	915.565	62.1746	6.20408e-15	3
M_0.5_F_q_Set_8	2.02439	0	0.0416667	923.211	69.8207	1.35628e-16	3
M_0.5_F_q_Set_9	2.19438	0	0.0416667	921.061	67.6706	3.97414e-16	3
M_0.5_F_qp_Set_1	1.99754	0	0	909.033	55.6435	1.62514e-13	3
M_0.5_F_qp_Set_10	2.00039	0	0	927.309	73.9194	1.74717e-17	6
M_0.5_F_qp_Set_11	1.99632	0	0.0416667	882.665	29.2754	8.64269e-08	8
M_0.5_F_qp_Set_2	2.00121	0	0.0416667	904.342	50.9519	1.69695e-12	3
M_0.5_F_qp_Set_3	2.18824	0	0.0833333	926.773	73.383	2.2846e-17	3
M_0.5_F_qp_Set_4	2.01676	0	0	932.253	78.8629	1.47528e-18	3
M_0.5_F_qp_Set_5	2.0024	0	0.0416667	935.689	82.2986	2.64734e-19	3
M_0.5_F_qp_Set_6	7.0604	0	0.0416667	935.816	82.4257	2.48438e-19	3
M_0.5_F_qp_Set_7	1.99676	0	0.0416667	885.164	31.7742	2.47774e-08	5
M_0.5_F_qp_Set_8	2.19421	0	0.0833333	908.801	55.4113	1.82526e-13	6
M_0.5_F_qp_Set_9	2.001	0	0.0416667	902.958	49.5683	3.38933e-12	6
M_0.5_F_lqp_Set_1	1.9395	0	0.0833333	866.68	13.2896	0.000255822	5
M_0.5_F_lqp_Set_10	1.94817	0	0.166667	890.953	37.5628	1.37111e-09	9
M_0.5_F_lqp_Set_11	2.01686	0	0.0833333	855.084	1.69397	0.0843117	11
M_0.5_F_lqp_Set_2	2.03697	0	0.0833333	865.682	12.2918	0.000421312	5
M_0.5_F_lqp_Set_3	2.01344	0	0.125	899.651	46.2609	1.77138e-11	5
M_0.5_F_lqp_Set_4	2.09083	0	0.208333	899.328	45.9376	2.08213e-11	4
M_0.5_F_lqp_Set_5	1.79475	0	0.0833333	894.897	41.5071	1.90798e-10	5
M_0.5_F_lqp_Set_6	3.01099	0	0.166667	918.881	65.4909	1.18185e-15	4
M_0.5_F_lqp_Set_7	2.03355	0	0.0833333	854.233	0.843027	0.129023	8
M_0.5_F_lqp_Set_8	1.99758	0	0.25	860.774	7.38378	0.00490187	8
M_0.5_F_lqp_Set_9	2.03205	0	0.0833333	865.367	11.9775	0.000493006	6
M_0.5_F_lqpt_Set_1	1.79216	0	0.458333	867.585	14.1949	0.000162687	17
M_0.5_F_lqpt_Set_10	2.16216	0	0.375	961.214	107.824	7.5857e-25	28
M_0.5_F_lqpt_Set_11	1.91387	0	0.375	997.009	143.619	1.27985e-32	33
M_0.5_F_lqpt_Set_2	1.99627	0	0.0833333	884.006	30.6161	4.4211e-08	16
M_0.5_F_lqpt_Set_3	1.96578	0	0.208333	927.033	73.6435	2.00559e-17	22
M_0.5_F_lqpt_Set_4	2.92143	0	0.25	913.923	60.5326	1.41006e-14	16
M_0.5_F_lqpt_Set_5	1.58129	0	0.333333	921.824	68.4339	2.71329e-16	22
M_0.5_F_lqpt_Set_6	3.18639	0	0.166667	924.314	70.9241	7.81175e-17	16
M_0.5_F_lqpt_Set_7	2.01833	0	0.416667	871.257	17.8672	2.59372e-05	20
M_0.5_F_lqpt_Set_8	1.8672	0	0.375	912.793	59.4032	2.48017e-14	27
M_0.5_F_lqpt_Set_9	1.99923	0	0.208333	900.76	47.3704	1.01713e-11	23
M_0.5_F_lqpth_Set_1	2.02274	0	0.5	883.933	30.5433	4.58492e-08	21
M_0.5_F_lqpth_Set_10	1.65797	0	0.375	1304.28	450.894	2.41764e-99	40
M_0.5_F_lqpth_Set_11	2.41081	0	0.5	NA	NA	NA	49
M_0.5_F_lqpth_Set_2	2.08074	0	0.0833333	942.432	89.042	9.08869e-21	25
M_0.5_F_lqpth_Set_3	2.04932	0	0.208333	985.233	131.843	4.61627e-30	28
M_0.5_F_lqpth_Set_4	2.09773	0	0.25	987.449	134.059	1.52493e-30	27
M_0.5_F_lqpth_Set_5	1.62717	0	0.291667	963.593	110.203	2.30944e-25	27
M_0.5_F_lqpth_Set_6	2.45527	0	0.125	1294.91	441.524	2.61787e-97	39
M_0.5_F_lqpth_Set_7	2.38803	0	0.416667	956.609	103.219	7.58408e-24	30
M_0.5_F_lqpth_Set_8	2.26306	0	0.5	1018.86	165.468	2.30591e-37	34
M_0.5_F_lqpth_Set_9	2.06668	0	0.166667	1105.75	252.36	3.12226e-56	36
M_0.5_F_lqph_Set_1	2.05407	0	0.291667	5443.41	4590.02	0	47
M_0.5_F_lqph_Set_10	1.83605	0	0.208333	NA	NA	NA	48
M_0.5_F_lqph_Set_11	2.25762	0	0.333333	NA	NA	NA	49
M_0.5_F_lqph_Set_2	2.0787	0	0.0833333	910.945	57.5551	6.24884e-14	18
M_0.5_F_lqph_Set_3	2.06652	0	0.166667	NA	NA	NA	53
M_0.5_F_lqph_Set_4	2.23449	0	0.291667	5482.15	4628.76	0	47
M_0.5_F_lqph_Set_5	1.73689	0	0.25	NA	NA	NA	56
M_0.5_F_lqph_Set_6	2.72509	0	0.166667	NA	NA	NA	86
M_0.5_F_lqph_Set_7	2.26978	0	0.291667	1040.06	186.669	5.74198e-42	33
M_0.5_F_lqph_Set_8	2.20134	0	0.291667	NA	NA	NA	51
M_0.5_F_lqph_Set_9	2.07111	0	0.125	2313.21	1459.82	1.98646009829515e-318	45
M_0.75_F_lq_Set_1	1.69239	0	0.208333	880.057	26.6668	3.185e-07	4
M_0.75_F_lq_Set_10	2.1009	0	0.0833333	901.396	48.0062	7.40142e-12	6
M_0.75_F_lq_Set_11	2.03405	0	0.0833333	862.511	9.12104	0.00205646	7
M_0.75_F_lq_Set_2	2.04992	0	0.0833333	866.311	12.9212	0.000307564	4
M_0.75_F_lq_Set_3	2.01374	0	0.125	899.11	45.7199	2.32152e-11	3
M_0.75_F_lq_Set_4	2.0877	0	0.166667	899.06	45.6697	2.38055e-11	4
M_0.75_F_lq_Set_5	1.6535	0	0.25	909.267	55.8775	1.44575e-13	4
M_0.75_F_lq_Set_6	2.53975	0	0.166667	918.681	65.2913	1.30589e-15	4
M_0.75_F_lq_Set_7	2.03235	0	0.0833333	862.844	9.45437	0.00174076	6
M_0.75_F_lq_Set_8	2.03652	0	0.291667	883.878	30.4877	4.71415e-08	6
M_0.75_F_lq_Set_9	2.05569	0	0.0833333	866.115	12.7247	0.000339305	5
M_0.75_F_lp_Set_1	1.96143	0	0.25	924.546	71.1563	6.95545e-17	3
M_0.75_F_lp_Set_10	2.16893	0	0.333333	902.266	48.8764	4.79008e-12	4
M_0.75_F_lp_Set_11	2.45399	0	0.291667	899.534	46.1437	1.87825e-11	9
M_0.75_F_lp_Set_2	2.69524	0	0.0833333	911.934	58.5438	3.81158e-14	3
M_0.75_F_lp_Set_3	1.99973	0	0.208333	928.081	74.6913	1.18775e-17	3
M_0.75_F_lp_Set_4	2.20325	0	0.375	906.258	52.8683	6.50907e-13	2
M_0.75_F_lp_Set_5	1.75516	0	0.208333	924.035	70.6452	8.98087e-17	3
M_0.75_F_lp_Set_6	3.91291	0	0.0416667	914.517	61.1271	1.04749e-14	2
M_0.75_F_lp_Set_7	2.69526	0	0.333333	904.579	51.1888	1.50741e-12	5
M_0.75_F_lp_Set_8	1.98233	0	0.291667	902.566	49.1763	4.1231e-12	6
M_0.75_F_lp_Set_9	2.7853	0	0.125	910.285	56.8953	8.69099e-14	4
M_0.75_F_q_Set_1	2.02478	0	0.0833333	927.042	73.652	1.99707e-17	2
M_0.75_F_q_Set_10	2.00478	0	0	930.484	77.0939	3.57269e-18	3
M_0.75_F_q_Set_11	2.02761	0	0.0416667	917.83	64.4398	1.99899e-15	4
M_0.75_F_q_Set_2	14.5975	0	0.0416667	919.309	65.919	9.54133e-16	2
M_0.75_F_q_Set_3	2.15528	0	0.0833333	926.149	72.7586	3.1218e-17	2
M_0.75_F_q_Set_4	2.08099	0	0	930.214	76.8239	4.08911e-18	2
M_0.75_F_q_Set_5	2.00362	0	0.0416667	934.236	80.8456	5.47439e-19	2
M_0.75_F_q_Set_6	23.4921	0	0.125	936.149	82.7588	2.10323e-19	2
M_0.75_F_q_Set_7	2.04574	0	0.0416667	915.615	62.2251	6.04946e-15	3
M_0.75_F_q_Set_8	2.02114	0	0.0416667	923.258	69.8677	1.32481e-16	3
M_0.75_F_q_Set_9	2.21048	0	0.0416667	921.104	67.7139	3.88912e-16	3
M_0.75_F_qp_Set_1	1.9978	0	0	909.886	56.4961	1.06108e-13	3
M_0.75_F_qp_Set_10	2.00143	0	0.0833333	928.916	75.526	7.82482e-18	6
M_0.75_F_qp_Set_11	1.99633	0	0.0416667	884.187	30.7971	4.03859e-08	8
M_0.75_F_qp_Set_2	2.00116	0	0.0416667	904.629	51.2392	1.46984e-12	3
M_0.75_F_qp_Set_3	2.16182	0	0.0833333	926.983	73.5929	2.05704e-17	3
M_0.75_F_qp_Set_4	2.01795	0	0	932.462	79.0717	1.32904e-18	3
M_0.75_F_qp_Set_5	2.0031	0	0.0416667	935.954	82.5642	2.31816e-19	3
M_0.75_F_qp_Set_6	9.05422	0	0.0416667	935.903	82.5132	2.37804e-19	3
M_0.75_F_qp_Set_7	1.9956	0	0.0416667	886.239	32.849	1.44764e-08	5
M_0.75_F_qp_Set_8	2.13933	0	0.125	909.832	56.4419	1.09023e-13	6
M_0.75_F_qp_Set_9	2.00017	0	0.0416667	903.75	50.3598	2.28161e-12	6
M_0.75_F_lqp_Set_1	1.94283	0	0.0833333	867.959	14.5692	0.000134914	5
M_0.75_F_lqp_Set_10	1.83126	0	0.166667	890.885	37.4955	1.418e-09	8
M_0.75_F_lqp_Set_11	2.00417	0	0.0833333	857.757	4.36709	0.0221527	11
M_0.75_F_lqp_Set_2	2.0147	0	0.0833333	866.727	13.3372	0.000249805	5
M_0.75_F_lqp_Set_3	2.0025	0	0.125	900.912	47.5217	9.4301e-12	5
M_0.75_F_lqp_Set_4	2.05037	0	0.291667	897.287	43.8969	5.77607e-11	3
M_0.75_F_lqp_Set_5	1.76966	0	0.125	894.105	40.7147	2.83559e-10	4
M_0.75_F_lqp_Set_6	3.34313	0	0.125	914.517	61.1271	1.04749e-14	2
M_0.75_F_lqp_Set_7	2.00777	0	0.0833333	853.39	0	0.196666	7
M_0.75_F_lqp_Set_8	1.99742	0	0.25	863.327	9.93705	0.0013675	8
M_0.75_F_lqp_Set_9	2.00953	0	0.0833333	866.557	13.167	0.000271988	6
M_0.75_F_lqpt_Set_1	2.01828	0	0.25	860.807	7.41718	0.00482069	12
M_0.75_F_lqpt_Set_10	2.09548	0	0.333333	900	46.6103	1.48737e-11	17
M_0.75_F_lqpt_Set_11	1.78795	0	0.333333	875.188	21.7981	3.63348e-06	20
M_0.75_F_lqpt_Set_2	2.00169	0	0.0833333	877.586	24.1957	1.09572e-06	11
M_0.75_F_lqpt_Set_3	1.89399	0	0.125	901.42	48.03	7.31378e-12	13
M_0.75_F_lqpt_Set_4	2.73892	0	0.25	899.346	45.9562	2.06283e-11	10
M_0.75_F_lqpt_Set_5	1.42255	0	0.333333	893.178	39.7877	4.5075e-10	12
M_0.75_F_lqpt_Set_6	2.4686	0	0.125	916.779	63.3893	3.38e-15	11
M_0.75_F_lqpt_Set_7	2.14591	0	0.25	853.925	0.534641	0.150533	13
M_0.75_F_lqpt_Set_8	1.69636	0	0.291667	875.634	22.2442	2.90707e-06	19
M_0.75_F_lqpt_Set_9	2.00376	0	0.125	886.476	33.0858	1.286e-08	17
M_0.75_F_lqpth_Set_1	1.80319	0	0.25	877.667	24.2769	1.05213e-06	16
M_0.75_F_lqpth_Set_10	1.58952	0	0.375	907.837	54.4466	2.95658e-13	20
M_0.75_F_lqpth_Set_11	1.99786	0	0.333333	918.629	65.2393	1.3403e-15	26
M_0.75_F_lqpth_Set_2	2.06215	0	0.0833333	888.364	34.9741	5.00261e-09	14
M_0.75_F_lqpth_Set_3	2.01347	0	0.125	1042.1	188.708	2.07175e-42	31
M_0.75_F_lqpth_Set_4	2.12769	0	0.25	949.479	96.0893	2.68043e-22	21
M_0.75_F_lqpth_Set_5	1.5294	0	0.25	931.083	77.6927	2.64833e-18	21
M_0.75_F_lqpth_Set_6	2.41617	0	0.166667	1011.59	158.201	8.72586e-36	27
M_0.75_F_lqpth_Set_7	2.0138	0	0.25	881.367	27.9768	1.65445e-07	19
M_0.75_F_lqpth_Set_8	1.96396	0	0.458333	914.912	61.5221	8.59766e-15	25
M_0.75_F_lqpth_Set_9	2.05798	0	0.0833333	908.839	55.449	1.79115e-13	21
M_0.75_F_lqph_Set_1	1.97666	0	0.25	1009.34	155.949	2.69057e-35	30
M_0.75_F_lqph_Set_10	1.79957	0	0.208333	1279.33	425.939	6.34381e-94	39
M_0.75_F_lqph_Set_11	2.04074	0	0.208333	918.734	65.3438	1.27204e-15	24
M_0.75_F_lqph_Set_2	2.05095	0	0.0833333	885.978	32.5883	1.64922e-08	12
M_0.75_F_lqph_Set_3	2.01789	0	0.125	1306.43	453.037	8.27808e-100	39
M_0.75_F_lqph_Set_4	2.167	0	0.25	1043.19	189.8	1.19975e-42	30
M_0.75_F_lqph_Set_5	1.61251	0	0.25	1243.73	390.344	3.40089e-86	38
M_0.75_F_lqph_Set_6	2.51287	0	0.166667	NA	NA	NA	69
M_0.75_F_lqph_Set_7	2.07948	0	0.25	888.738	35.3485	4.14859e-09	18
M_0.75_F_lqph_Set_8	2.04027	0	0.25	931.696	78.3065	1.94847e-18	24
M_0.75_F_lqph_Set_9	2.07636	0	0.0833333	890.513	37.1233	1.70804e-09	14
M_1_F_lq_Set_1	1.94894	0	0.208333	880.226	26.8357	2.92702e-07	4
M_1_F_lq_Set_10	2.09298	0	0.166667	901.714	48.3242	6.31349e-12	6
M_1_F_lq_Set_11	2.01066	0	0.0833333	862.819	9.42859	0.00176334	7
M_1_F_lq_Set_2	2.03876	0	0.0833333	866.63	13.2404	0.000262189	4
M_1_F_lq_Set_3	2.00931	0	0.125	899.25	45.8598	2.16472e-11	3
M_1_F_lq_Set_4	2.08732	0	0.208333	899.271	45.8811	2.1418e-11	4
M_1_F_lq_Set_5	1.76586	0	0.25	909.4	56.01	1.35304e-13	4
M_1_F_lq_Set_6	2.99489	0	0.166667	918.839	65.4488	1.207e-15	4
M_1_F_lq_Set_7	2.00979	0	0.0833333	863.175	9.78537	0.00147524	6
M_1_F_lq_Set_8	2.02252	0	0.291667	884.064	30.6742	4.29452e-08	6
M_1_F_lq_Set_9	2.03837	0	0.0833333	866.4	13.0096	0.000294254	5
M_1_F_lp_Set_1	1.95731	0	0.25	924.611	71.2207	6.73505e-17	3
M_1_F_lp_Set_10	2.21271	0	0.333333	902.608	49.218	4.03814e-12	4
M_1_F_lp_Set_11	2.39025	0	0.291667	901.077	47.6875	8.67985e-12	9
M_1_F_lp_Set_2	2.64351	0	0.0416667	912.401	59.0114	3.01696e-14	3
M_1_F_lp_Set_3	1.99785	0	0.208333	928.563	75.1735	9.33259e-18	3
M_1_F_lp_Set_4	2.18341	0	0.375	906.364	52.9736	6.17531e-13	2
M_1_F_lp_Set_5	1.64272	0	0.25	924.475	71.0851	7.20761e-17	3
M_1_F_lp_Set_6	3.32826	0	0.0416667	914.637	61.2475	9.86297e-15	2
M_1_F_lp_Set_7	2.52805	0	0.333333	905.118	51.7277	1.15131e-12	5
M_1_F_lp_Set_8	1.98325	0	0.291667	903.465	50.0754	2.63027e-12	6
M_1_F_lp_Set_9	2.62796	0	0.0416667	910.449	57.0589	8.00852e-14	4
M_1_F_q_Set_1	2.02245	0	0.0833333	927.096	73.7058	1.94411e-17	2
M_1_F_q_Set_10	2.00538	0	0	930.548	77.1579	3.46023e-18	3
M_1_F_q_Set_11	2.02576	0	0.0416667	917.906	64.5162	1.92404e-15	4
M_1_F_q_Set_2	13.3718	0	0.0416667	919.36	65.9698	9.30202e-16	2
M_1_F_q_Set_3	2.16968	0	0.0833333	926.194	72.8042	3.05135e-17	2
M_1_F_q_Set_4	2.13199	0	0	930.28	76.8897	3.95685e-18	2
M_1_F_q_Set_5	2.00434	0	0.0416667	934.295	80.9047	5.31486e-19	2
M_1_F_q_Set_6	25.5998	0	0.125	936.177	82.7874	2.07331e-19	2
M_1_F_q_Set_7	2.04801	0	0.0416667	915.686	62.2958	5.83951e-15	3
M_1_F_q_Set_8	2.02367	0	0.0416667	923.321	69.9313	1.28335e-16	3
M_1_F_q_Set_9	2.17611	0	0.0416667	921.16	67.7705	3.78054e-16	3
M_1_F_qp_Set_1	1.99793	0	0	910.843	57.4526	6.57751e-14	3
M_1_F_qp_Set_10	2.0013	0	0.0833333	926.959	73.5687	2.08202e-17	5
M_1_F_qp_Set_11	1.9967	0	0.0416667	888.954	35.5643	3.7243e-09	9
M_1_F_qp_Set_2	2.00094	0	0.0416667	905.017	51.6266	1.21104e-12	3
M_1_F_qp_Set_3	2.13978	0	0.0833333	927.269	73.8793	1.78256e-17	3
M_1_F_qp_Set_4	2.00176	0	0	932.74	79.3505	1.15605e-18	3
M_1_F_qp_Set_5	1.99922	0	0	936.311	82.9206	1.9398e-19	3
M_1_F_qp_Set_6	10.0916	0	0.0416667	936.018	82.6278	2.24559e-19	3
M_1_F_qp_Set_7	1.99508	0	0.0416667	887.452	34.0621	7.8929e-09	5
M_1_F_qp_Set_8	2.05238	0	0.125	908.408	55.0182	2.22162e-13	5
M_1_F_qp_Set_9	2.00016	0	0.0416667	904.709	51.3191	1.41229e-12	6
M_1_F_lqp_Set_1	1.90418	0	0.0833333	869.399	16.0087	6.56886e-05	5
M_1_F_lqp_Set_10	2.0614	0	0.25	888.056	34.6663	5.83481e-09	6
M_1_F_lqp_Set_11	2.00094	0	0.0833333	857.525	4.13523	0.0248757	10
M_1_F_lqp_Set_2	2.00627	0	0.0833333	868.065	14.6749	0.000127972	5
M_1_F_lqp_Set_3	1.99941	0	0.125	902.34	48.9497	4.61776e-12	5
M_1_F_lqp_Set_4	2.06483	0	0.333333	897.71	44.3203	4.67401e-11	3
M_1_F_lqp_Set_5	1.8454	0	0.208333	895.452	42.0622	1.4456e-10	4
M_1_F_lqp_Set_6	3.18017	0	0.0833333	914.637	61.2475	9.86297e-15	2
M_1_F_lqp_Set_7	2.00028	0	0.0833333	855.058	1.66826	0.0854024	7
M_1_F_lqp_Set_8	1.99166	0	0.25	866.322	12.932	0.000305896	8
M_1_F_lqp_Set_9	2.00526	0	0.0833333	868.1	14.7097	0.000125765	6
M_1_F_lqpt_Set_1	1.97214	0	0.25	872.302	18.9122	1.53812e-05	11
M_1_F_lqpt_Set_10	2.03689	0	0.333333	899.175	45.7851	2.24706e-11	15
M_1_F_lqpt_Set_11	2.00942	0	0.333333	868.652	15.2618	9.54269e-05	16
M_1_F_lqpt_Set_2	2.00708	0	0.0833333	870.938	17.5484	3.04183e-05	7
M_1_F_lqpt_Set_3	1.84512	0	0.125	900.153	46.7633	1.37786e-11	8
M_1_F_lqpt_Set_4	2.78447	0	0.25	896.648	43.2579	7.95046e-11	8
M_1_F_lqpt_Set_5	1.40158	0	0.291667	892.694	39.3044	5.7397e-10	10
M_1_F_lqpt_Set_6	2.78968	0	0.125	914.093	60.7034	1.29465e-14	7
M_1_F_lqpt_Set_7	2.11713	0	0.25	856.339	2.94879	0.0450202	10
M_1_F_lqpt_Set_8	2.00921	0	0.333333	865.402	12.0125	0.00048446	13
M_1_F_lqpt_Set_9	2.0023	0	0.0833333	874.902	21.5118	4.1928e-06	11
M_1_F_lqpth_Set_1	1.86439	0	0.25	883.122	29.7323	6.87759e-08	14
M_1_F_lqpth_Set_10	2.24999	0	0.291667	948.31	94.9202	4.80921e-22	24
M_1_F_lqpth_Set_11	2.00709	0	0.25	916.369	62.9786	4.15051e-15	24
M_1_F_lqpth_Set_2	2.03406	0	0.0833333	881.496	28.106	1.55091e-07	11
M_1_F_lqpth_Set_3	2.00328	0	0.125	1027.52	174.13	3.03281e-39	29
M_1_F_lqpth_Set_4	2.08499	0	0.25	909.927	56.5367	1.0398e-13	12
M_1_F_lqpth_Set_5	1.55424	0	0.25	943.342	89.9518	5.76695e-21	21
M_1_F_lqpth_Set_6	2.38446	0	0.166667	1133.27	279.879	3.3022e-62	34
M_1_F_lqpth_Set_7	1.98127	0	0.25	875.541	22.1512	3.04547e-06	15
M_1_F_lqpth_Set_8	1.9814	0	0.25	881.993	28.6026	1.20991e-07	17
M_1_F_lqpth_Set_9	2.04432	0	0.0833333	888.462	35.0722	4.76311e-09	15
M_1_F_lqph_Set_1	1.92014	0	0.208333	898.383	44.9926	3.33968e-11	16
M_1_F_lqph_Set_10	2.2608	0	0.25	953.91	100.52	2.92469e-23	23
M_1_F_lqph_Set_11	2.00215	0	0.166667	895.647	42.2566	1.31168e-10	20
M_1_F_lqph_Set_2	2.03328	0	0.0833333	890.485	37.0947	1.73266e-09	13
M_1_F_lqph_Set_3	2.00431	0	0.125	991.272	137.882	2.25449e-31	25
M_1_F_lqph_Set_4	2.12982	0	0.25	912.033	58.6432	3.62678e-14	11
M_1_F_lqph_Set_5	1.56744	0	0.25	1093.7	240.312	1.29011e-53	33
M_1_F_lqph_Set_6	2.38577	0	0.166667	NA	NA	NA	53
M_1_F_lqph_Set_7	1.97681	0	0.25	876.963	23.5733	1.49576e-06	15
M_1_F_lqph_Set_8	1.98837	0	0.25	914.894	61.5041	8.67532e-15	21
M_1_F_lqph_Set_9	2.04219	0	0.0833333	884.324	30.9341	3.77111e-08	12
M_2_F_lq_Set_1	1.94207	0	0.208333	881.288	27.8976	1.72125e-07	4
M_2_F_lq_Set_10	2.03785	0	0.333333	897.98	44.5899	4.08456e-11	4
M_2_F_lq_Set_11	2.00279	0	0.0833333	864.817	11.4272	0.000649146	7
M_2_F_lq_Set_2	2.00699	0	0.0833333	868.576	15.186	9.91151e-05	4
M_2_F_lq_Set_3	1.99944	0	0.125	900.116	46.7265	1.40343e-11	3
M_2_F_lq_Set_4	2.05605	0	0.333333	897.609	44.2188	4.91746e-11	3
M_2_F_lq_Set_5	1.71815	0	0.25	910.243	56.8528	8.87785e-14	4
M_2_F_lq_Set_6	3.2598	0	0.0833333	914.608	61.2181	1.00091e-14	2
M_2_F_lq_Set_7	2.00251	0	0.0833333	862.333	8.9435	0.00224736	5
M_2_F_lq_Set_8	1.99473	0	0.291667	885.238	31.8479	2.3881e-08	6
M_2_F_lq_Set_9	2.00605	0	0.0833333	868.276	14.8862	0.000115142	5
M_2_F_lp_Set_1	1.95778	0	0.25	925.017	71.6275	5.49562e-17	3
M_2_F_lp_Set_10	2.13306	0	0.375	905.019	51.629	1.20955e-12	4
M_2_F_lp_Set_11	2.23326	0	0.208333	906.271	52.8812	6.46729e-13	8
M_2_F_lp_Set_2	2.4007	0	0.0416667	911.669	58.279	4.35121e-14	2
M_2_F_lp_Set_3	1.59251	0	0.0833333	931.825	78.4346	1.82754e-18	3
M_2_F_lp_Set_4	2.14848	0	0.375	907.067	53.6773	4.34371e-13	2
M_2_F_lp_Set_5	1.44673	0	0.25	927.473	74.0826	1.61022e-17	3
M_2_F_lp_Set_6	2.57297	0	0.0833333	915.466	62.0765	6.51611e-15	2
M_2_F_lp_Set_7	2.08843	0	0.25	908.7	55.3101	1.91995e-13	5
M_2_F_lp_Set_8	1.94934	0	0.333333	901.89	48.5005	5.78071e-12	4
M_2_F_lp_Set_9	2.35891	0	0.0416667	911.552	58.1617	4.61408e-14	4
M_2_F_q_Set_1	1.96492	0	0.0833333	927.453	74.0634	1.62577e-17	2
M_2_F_q_Set_10	2.01917	0	0	930.959	77.569	2.81729e-18	3
M_2_F_q_Set_11	2.02548	0	0.0833333	918.412	65.0218	1.49424e-15	4
M_2_F_q_Set_2	4.41215	0	0.0416667	919.709	66.3189	7.81189e-16	2
M_2_F_q_Set_3	2.13266	0	0.0833333	926.489	73.0988	2.63346e-17	2
M_2_F_q_Set_4	20.7572	0	0.0833333	930.7	77.3097	3.20732e-18	2
M_2_F_q_Set_5	1.99987	0	0	934.683	81.2933	4.37633e-19	2
M_2_F_q_Set_6	26.0377	0	0.0833333	936.351	82.9608	1.90113e-19	2
M_2_F_q_Set_7	2.04531	0	0.0416667	916.169	62.7788	4.58663e-15	3
M_2_F_q_Set_8	2.0228	0	0.0833333	923.74	70.3498	1.04101e-16	3
M_2_F_q_Set_9	2.1469	0	0.0833333	921.521	68.1306	3.15754e-16	3
M_2_F_qp_Set_1	1.99495	0	0.0416667	915.171	61.781	7.55345e-15	3
M_2_F_qp_Set_10	3.37627	0	0.125	930.782	77.3916	3.07857e-18	5
M_2_F_qp_Set_11	1.99596	0	0.0416667	897.146	43.7556	6.19892e-11	9
M_2_F_qp_Set_2	2.00048	0	0.0416667	907.48	54.0904	3.53301e-13	3
M_2_F_qp_Set_3	2.12974	0	0.125	929.152	75.7616	6.95505e-18	3
M_2_F_qp_Set_4	1.99844	0	0.0833333	934.508	81.1185	4.77617e-19	3
M_2_F_qp_Set_5	3.37641	0	0.125	938.52	85.1305	6.42509e-20	3
M_2_F_qp_Set_6	3.9369	0	0.125	936.809	83.4187	1.51214e-19	3
M_2_F_qp_Set_7	1.9889	0	0.0416667	895.878	42.4884	1.16811e-10	6
M_2_F_qp_Set_8	1.99565	0	0.125	914.087	60.6971	1.29873e-14	5
M_2_F_qp_Set_9	1.99977	0	0.0416667	907.121	53.7307	4.22914e-13	5
M_2_F_lqp_Set_1	1.99561	0	0.166667	876.017	22.6275	2.40013e-06	5
M_2_F_lqp_Set_10	2.1337	0	0.375	894.991	41.6009	1.82056e-10	5
M_2_F_lqp_Set_11	1.99759	0	0.125	862.613	9.22318	0.00195407	8
M_2_F_lqp_Set_2	2.00151	0	0.0833333	869.598	16.2079	5.94614e-05	4
M_2_F_lqp_Set_3	2.00028	0	0.125	905.484	52.0936	9.58853e-13	4
M_2_F_lqp_Set_4	2.14055	0	0.375	900.22	46.8304	1.33241e-11	3
M_2_F_lqp_Set_5	1.56074	0	0.25	906.04	52.6497	7.26097e-13	5
M_2_F_lqp_Set_6	2.63162	0	0.0833333	915.466	62.0765	6.51611e-15	2
M_2_F_lqp_Set_7	1.99771	0	0.125	862.565	9.1746	0.00200211	7
M_2_F_lqp_Set_8	1.87428	0	0.166667	873.498	20.108	8.45917e-06	7
M_2_F_lqp_Set_9	2.00199	0	0.0833333	869.539	16.1486	6.12507e-05	4
M_2_F_lqpt_Set_1	1.95211	0	0.25	872.661	19.2709	1.28561e-05	7
M_2_F_lqpt_Set_10	2.27908	0	0.25	896.105	42.7153	1.04286e-10	8
M_2_F_lqpt_Set_11	2.06983	0	0.25	865.18	11.7896	0.000541575	10
M_2_F_lqpt_Set_2	2.41702	0	0.0833333	871.501	18.1112	2.29584e-05	5
M_2_F_lqpt_Set_3	1.72701	0	0.125	903.663	50.2735	2.38218e-12	4
M_2_F_lqpt_Set_4	2.27447	0	0.25	896.22	42.8298	9.84841e-11	4
M_2_F_lqpt_Set_5	1.97372	0	0.291667	910.968	57.5781	6.1773e-14	8
M_2_F_lqpt_Set_6	2.63288	0	0.0833333	916.363	62.9731	4.16193e-15	4
M_2_F_lqpt_Set_7	2.05973	0	0.25	862.97	9.57998	0.00163479	9
M_2_F_lqpt_Set_8	1.95279	0	0.25	872.145	18.7551	1.66385e-05	9
M_2_F_lqpt_Set_9	2.35835	0	0.0833333	871.438	18.048	2.36952e-05	5
M_2_F_lqpth_Set_1	1.67689	0	0.208333	885.482	32.0925	2.11317e-08	11
M_2_F_lqpth_Set_10	2.08465	0	0.291667	938.372	84.982	6.92029e-20	19
M_2_F_lqpth_Set_11	1.68251	0	0.166667	881.909	28.5192	1.26143e-07	15
M_2_F_lqpth_Set_2	2.0065	0	0.0833333	876.722	23.3316	1.68786e-06	8
M_2_F_lqpth_Set_3	2.00008	0	0.125	932.698	79.3076	1.18115e-18	14
M_2_F_lqpth_Set_4	2.02497	0	0.25	900.082	46.6922	1.42771e-11	6
M_2_F_lqpth_Set_5	1.56237	0	0.333333	1003.16	149.772	5.90405e-34	26
M_2_F_lqpth_Set_6	2.28638	0	0.125	972.573	119.183	2.5909e-27	19
M_2_F_lqpth_Set_7	1.67327	0	0.125	868.584	15.1936	9.87378e-05	11
M_2_F_lqpth_Set_8	1.68987	0	0.25	907.955	54.565	2.78667e-13	18
M_2_F_lqpth_Set_9	2.01337	0	0.0833333	879.742	26.3525	3.72697e-07	9
M_2_F_lqph_Set_1	1.66349	0	0.208333	897.368	43.9776	5.54769e-11	14
M_2_F_lqph_Set_10	2.09398	0	0.291667	938.642	85.2517	6.04724e-20	19
M_2_F_lqph_Set_11	1.65798	0	0.166667	878.208	24.818	8.02735e-07	14
M_2_F_lqph_Set_2	2.00755	0	0.0833333	873.834	20.4442	7.15037e-06	7
M_2_F_lqph_Set_3	2.00048	0	0.125	951.471	98.0815	9.89904e-23	18
M_2_F_lqph_Set_4	2.02745	0	0.25	902.809	49.4192	3.65168e-12	7
M_2_F_lqph_Set_5	1.57631	0	0.333333	1003.39	150.003	5.25921e-34	26
M_2_F_lqph_Set_6	2.28746	0	0.125	998.515	145.125	6.02806e-33	23
M_2_F_lqph_Set_7	1.65008	0	0.125	868.618	15.2282	9.7044e-05	11
M_2_F_lqph_Set_8	1.69637	0	0.25	940.487	87.0975	2.403e-20	23
M_2_F_lqph_Set_9	2.01346	0	0.0833333	873.794	20.404	7.29548e-06	7
M_3_F_lq_Set_1	1.90539	0	0.166667	882.871	29.481	7.79833e-08	4
M_3_F_lq_Set_10	2.12212	0	0.375	899.104	45.7145	2.3278e-11	4
M_3_F_lq_Set_11	2.00063	0	0.0833333	865.051	11.6606	0.000577648	6
M_3_F_lq_Set_2	2.0023	0	0.0833333	867.52	14.1298	0.000168067	3
M_3_F_lq_Set_3	1.99994	0	0.125	901.397	48.0067	7.3997e-12	3
M_3_F_lq_Set_4	2.16081	0	0.375	898.613	45.223	2.97637e-11	3
M_3_F_lq_Set_5	1.59414	0	0.291667	911.528	58.1384	4.668e-14	4
M_3_F_lq_Set_6	2.75113	0	0.0833333	914.914	61.5238	8.59037e-15	2
M_3_F_lq_Set_7	2.0005	0	0.0833333	863.857	10.4669	0.00104924	5
M_3_F_lq_Set_8	1.97025	0	0.291667	887.002	33.6123	9.88353e-09	6
M_3_F_lq_Set_9	2.00205	0	0.0833333	868.603	15.2128	9.77927e-05	4
M_3_F_lp_Set_1	1.95966	0	0.25	925.681	72.2911	3.9438e-17	3
M_3_F_lp_Set_10	2.1596	0	0.375	909.431	56.0414	1.33196e-13	4
M_3_F_lp_Set_11	2.07649	0	0.25	904.7	51.3098	1.41887e-12	6
M_3_F_lp_Set_2	2.27648	0	0.0833333	912.576	59.1859	2.76484e-14	2
M_3_F_lp_Set_3	1.59132	0	0.0833333	933.871	80.4811	6.5688e-19	2
M_3_F_lp_Set_4	2.15269	0	0.375	908.242	54.8518	2.41439e-13	2
M_3_F_lp_Set_5	1.44887	0	0.25	932.587	79.1973	1.24809e-18	3
M_3_F_lp_Set_6	2.58574	0	0.0833333	916.912	63.5224	3.1624e-15	2
M_3_F_lp_Set_7	2.08158	0	0.25	909.057	55.6673	1.60593e-13	4
M_3_F_lp_Set_8	1.96066	0	0.25	905.255	51.8654	1.07472e-12	4
M_3_F_lp_Set_9	2.22825	0	0.0833333	913.448	60.0579	1.78777e-14	4
M_3_F_q_Set_1	1.95519	0	0.0833333	928.025	74.635	1.22164e-17	2
M_3_F_q_Set_10	2.9646	0	0.125	931.617	78.227	2.02748e-18	3
M_3_F_q_Set_11	2.01851	0	0.0833333	919.231	65.8408	9.92177e-16	4
M_3_F_q_Set_2	2.70151	0	0.0833333	920.295	66.905	5.82755e-16	2
M_3_F_q_Set_3	2.11805	0	0.0833333	926.965	73.5755	2.07498e-17	2
M_3_F_q_Set_4	64.2301	0	0.0833333	931.357	77.9672	2.30865e-18	2
M_3_F_q_Set_5	2.96345	0	0.125	935.308	81.9178	3.20259e-19	2
M_3_F_q_Set_6	3.55297	0	0.125	936.632	83.2418	1.65194e-19	2
M_3_F_q_Set_7	2.04189	0	0.0833333	916.972	63.5824	3.06888e-15	3
M_3_F_q_Set_8	2.01733	0	0.0833333	924.42	71.0297	7.41001e-17	3
M_3_F_q_Set_9	2.12529	0	0.0833333	922.098	68.7079	2.36592e-16	3
M_3_F_qp_Set_1	1.9848	0	0.0416667	919.916	66.5259	7.04377e-16	3
M_3_F_qp_Set_10	98.0919	0	0.125	936.544	83.1538	1.72627e-19	5
M_3_F_qp_Set_11	1.98314	0	0.0416667	907.191	53.8015	4.082e-13	9
M_3_F_qp_Set_2	2.0035	0	0.0416667	911.333	57.9431	5.14692e-14	3
M_3_F_qp_Set_3	2.08868	0	0.0416667	932.26	78.8701	1.46995e-18	3
M_3_F_qp_Set_4	NA	NA	0	937.306	83.9162	1.17911e-19	3
M_3_F_qp_Set_5	98.2824	0	0.125	939.037	85.6469	4.96299e-20	2
M_3_F_qp_Set_6	119.227	0	0.125	938.353	84.9627	6.98751e-20	3
M_3_F_qp_Set_7	1.98314	0	0.0416667	902.936	49.5458	3.42772e-12	6
M_3_F_qp_Set_8	1.9848	0	0.0416667	921.005	67.6145	4.08712e-16	5
M_3_F_qp_Set_9	2.00172	0	0.0416667	910.627	57.2369	7.3265e-14	4
M_3_F_lqp_Set_1	1.83902	0	0.25	883.547	30.1573	5.56091e-08	5
M_3_F_lqp_Set_10	2.15561	0	0.375	904.044	50.6545	1.96896e-12	5
M_3_F_lqp_Set_11	1.98926	0	0.166667	873.226	19.8361	9.69125e-06	8
M_3_F_lqp_Set_2	2.0009	0	0.0833333	874.664	21.2737	4.72283e-06	4
M_3_F_lqp_Set_3	1.90306	0	0.0833333	908.04	54.6499	2.6709e-13	3
M_3_F_lqp_Set_4	2.15721	0	0.375	903.739	50.3491	2.29381e-12	3
M_3_F_lqp_Set_5	1.4473	0	0.25	917.06	63.6704	2.93689e-15	5
M_3_F_lqp_Set_6	2.58504	0	0.0833333	916.912	63.5224	3.1624e-15	2
M_3_F_lqp_Set_7	1.98895	0	0.166667	870.891	17.5013	3.11441e-05	7
M_3_F_lqp_Set_8	1.83918	0	0.25	882.151	28.7613	1.1176e-07	6
M_3_F_lqp_Set_9	2.00109	0	0.0833333	874.606	21.2156	4.86214e-06	4
M_3_F_lqpt_Set_1	1.94603	0	0.291667	881.678	28.2877	1.41624e-07	7
M_3_F_lqpt_Set_10	2.19644	0	0.25	903.132	49.7421	3.10715e-12	6
M_3_F_lqpt_Set_11	2.20325	0	0.291667	872.805	19.4148	1.19635e-05	9
M_3_F_lqpt_Set_2	2.30001	0	0.0833333	876.804	23.4136	1.62007e-06	5
M_3_F_lqpt_Set_3	1.47701	0	0.166667	908.454	55.0638	2.17155e-13	4
M_3_F_lqpt_Set_4	2.19641	0	0.25	900.609	47.2187	1.09729e-11	4
M_3_F_lqpt_Set_5	1.33706	0	0.25	919.371	65.9807	9.25143e-16	7
M_3_F_lqpt_Set_6	2.58504	0	0.0833333	916.912	63.5224	3.1624e-15	2
M_3_F_lqpt_Set_7	2.1934	0	0.291667	872.865	19.4749	1.16096e-05	9
M_3_F_lqpt_Set_8	1.94641	0	0.291667	881.878	28.4885	1.28094e-07	8
M_3_F_lqpt_Set_9	2.25112	0	0.0833333	876.739	23.3487	1.67346e-06	5
M_3_F_lqpth_Set_1	1.66746	0	0.25	886.184	32.7936	1.48832e-08	9
M_3_F_lqpth_Set_10	2.02973	0	0.291667	924.516	71.1258	7.06258e-17	14
M_3_F_lqpth_Set_11	1.64145	0	0.166667	869.405	16.0149	6.54845e-05	9
M_3_F_lqpth_Set_2	2.00518	0	0.0833333	877.933	24.5435	9.20815e-07	7
M_3_F_lqpth_Set_3	2.00051	0	0.0833333	905.619	52.229	8.96069e-13	4
M_3_F_lqpth_Set_4	1.89669	0	0.25	902.757	49.3669	3.74838e-12	6
M_3_F_lqpth_Set_5	1.55373	0	0.25	983.919	130.529	8.90458e-30	23
M_3_F_lqpth_Set_6	2.23731	0	0.125	963.884	110.494	1.99599e-25	17
M_3_F_lqpth_Set_7	1.64553	0	0.125	869.441	16.0506	6.4326e-05	9
M_3_F_lqpth_Set_8	1.66658	0	0.25	900.28	46.8905	1.29295e-11	14
M_3_F_lqpth_Set_9	2.00644	0	0.0833333	877.879	24.4889	9.46304e-07	7
M_3_F_lqph_Set_1	1.67659	0	0.25	886.207	32.8168	1.4711e-08	9
M_3_F_lqph_Set_10	2.03142	0	0.291667	990.74	137.351	2.94062e-31	25
M_3_F_lqph_Set_11	1.63042	0	0.166667	875.786	22.3957	2.69505e-06	11
M_3_F_lqph_Set_2	2.00616	0	0.0833333	875.168	21.7784	3.66957e-06	6
M_3_F_lqph_Set_3	2.00067	0	0.0833333	910.715	57.3253	7.0098e-14	6
M_3_F_lqph_Set_4	1.87762	0	0.25	902.756	49.3663	3.7495e-12	6
M_3_F_lqph_Set_5	1.56026	0	0.25	1109.37	255.977	5.11816e-57	33
M_3_F_lqph_Set_6	2.23826	0	0.125	963.884	110.494	1.99599e-25	17
M_3_F_lqph_Set_7	1.64132	0	0.125	872.557	19.1675	1.35379e-05	10
M_3_F_lqph_Set_8	1.64921	0	0.25	913.722	60.3325	1.55844e-14	17
M_3_F_lqph_Set_9	2.00606	0	0.0833333	875.124	21.7338	3.75236e-06	6
M_4_F_lq_Set_1	1.88479	0	0.166667	884.885	31.4955	2.84821e-08	4
M_4_F_lq_Set_10	2.13651	0	0.375	900.549	47.159	1.13053e-11	4
M_4_F_lq_Set_11	2.00012	0	0.0833333	868.161	14.7706	0.00012199	6
M_4_F_lq_Set_2	2.00141	0	0.0833333	869.155	15.7647	7.42127e-05	3
M_4_F_lq_Set_3	1.99998	0	0.125	903.022	49.6321	3.28292e-12	3
M_4_F_lq_Set_4	2.14595	0	0.375	899.888	46.4982	1.57313e-11	3
M_4_F_lq_Set_5	1.57935	0	0.25	913.21	59.8203	2.01337e-14	4
M_4_F_lq_Set_6	2.67931	0	0.0833333	915.346	61.9563	6.91972e-15	2
M_4_F_lq_Set_7	2.00007	0	0.0833333	865.772	12.3821	0.000402701	5
M_4_F_lq_Set_8	1.92576	0	0.166667	889.279	35.8895	3.16539e-09	6
M_4_F_lq_Set_9	2.00155	0	0.0833333	869.066	15.6762	7.75673e-05	3
M_4_F_lp_Set_1	1.96781	0	0.25	926.633	73.2435	2.4497e-17	3
M_4_F_lp_Set_10	2.03535	0	0.291667	911.842	58.4521	3.99039e-14	3
M_4_F_lp_Set_11	1.91922	0	0.25	906.446	53.056	5.92594e-13	5
M_4_F_lp_Set_2	2.41881	0	0.0833333	913.873	60.4831	1.44538e-14	2
M_4_F_lp_Set_3	1.57047	0	0.0833333	936.347	82.9571	1.90464e-19	2
M_4_F_lp_Set_4	2.03829	0	0.291667	909.913	56.5233	1.04678e-13	2
M_4_F_lp_Set_5	1.48697	0	0.25	937.25	83.8599	1.21276e-19	2
M_4_F_lp_Set_6	3.23285	0	0.0833333	919.07	65.6803	1.07508e-15	2
M_4_F_lp_Set_7	1.91858	0	0.25	910.69	57.3001	7.09858e-14	4
M_4_F_lp_Set_8	1.9682	0	0.25	910.129	56.7387	9.39891e-14	4
M_4_F_lp_Set_9	2.39629	0	0.0833333	916.324	62.9342	4.24367e-15	4
M_4_F_q_Set_1	1.94441	0	0.0833333	928.794	75.4039	8.31742e-18	2
M_4_F_q_Set_10	3.42353	0	0.125	932.528	79.138	1.28567e-18	3
M_4_F_q_Set_11	2.0181	0	0.125	920.363	66.9732	5.63215e-16	4
M_4_F_q_Set_2	2.03307	0	0.0833333	921.126	67.7362	3.84592e-16	2
M_4_F_q_Set_3	2.12392	0	0.125	927.631	74.2409	1.48773e-17	2
M_4_F_q_Set_4	NA	NA	0	932.241	78.8515	1.48371e-18	2
M_4_F_q_Set_5	3.42353	0	0.125	936.16	82.77	2.09146e-19	2
M_4_F_q_Set_6	4.02429	0	0.125	937.043	83.6528	1.34508e-19	2
M_4_F_q_Set_7	1.9448	0	0.0833333	918.102	64.7121	1.74451e-15	3
M_4_F_q_Set_8	2.01737	0	0.125	925.364	71.9742	4.621e-17	3
M_4_F_q_Set_9	2.14299	0	0.125	922.904	69.5138	1.58123e-16	3
M_4_F_qp_Set_1	1.97223	0	0.0416667	924.939	71.5488	5.71616e-17	3
M_4_F_qp_Set_10	NA	NA	0	940.331	86.9409	2.59867e-20	4
M_4_F_qp_Set_11	1.97236	0	0.0416667	913.944	60.5536	1.39537e-14	7
M_4_F_qp_Set_2	NA	NA	0	916.711	63.3215	3.49654e-15	3
M_4_F_qp_Set_3	NA	NA	0	933.381	79.9914	8.39123e-19	2
M_4_F_qp_Set_4	NA	NA	0	941.327	87.9366	1.57954e-20	3
M_4_F_qp_Set_5	NA	NA	0	943.854	90.4643	4.46328e-21	1
M_4_F_qp_Set_6	NA	NA	0	938.837	85.447	5.48478e-20	2
M_4_F_qp_Set_7	1.97236	0	0.0416667	911.334	57.9442	5.14403e-14	6
M_4_F_qp_Set_8	1.97223	0	0.0416667	925.845	72.4549	3.63365e-17	4
M_4_F_qp_Set_9	NA	NA	0	917.212	63.8216	2.72302e-15	4
M_4_F_lqp_Set_1	1.97507	0	0.25	891.866	38.4764	8.68332e-10	5
M_4_F_lqp_Set_10	2.03443	0	0.291667	910.176	56.7856	9.18085e-14	4
M_4_F_lqp_Set_11	1.90187	0	0.25	872.692	19.3019	1.26584e-05	5
M_4_F_lqp_Set_2	2.04847	0	0.0833333	880.947	27.5571	2.04071e-07	4
M_4_F_lqp_Set_3	1.57046	0	0.0833333	914.06	60.67	1.31648e-14	3
M_4_F_lqp_Set_4	2.03609	0	0.291667	908.05	54.6596	2.658e-13	3
M_4_F_lqp_Set_5	1.48916	0	0.25	923.132	69.7422	1.41061e-16	3
M_4_F_lqp_Set_6	3.22932	0	0.0833333	919.07	65.6803	1.07508e-15	2
M_4_F_lqp_Set_7	1.90225	0	0.25	872.758	19.3683	1.22451e-05	5
M_4_F_lqp_Set_8	1.97499	0	0.25	892.062	38.6724	7.87284e-10	6
M_4_F_lqp_Set_9	2.04575	0	0.0833333	880.893	27.5026	2.0971e-07	4
M_4_F_lqpt_Set_1	1.72533	0	0.291667	888.543	35.1526	4.57539e-09	6
M_4_F_lqpt_Set_10	2.34484	0	0.25	908.378	54.988	2.25546e-13	5
M_4_F_lqpt_Set_11	1.7304	0	0.291667	876.541	23.1514	1.84702e-06	7
M_4_F_lqpt_Set_2	2.47634	0	0.0833333	883.268	29.8783	6.39355e-08	5
M_4_F_lqpt_Set_3	1.2785	0	0.0833333	914.491	61.1007	1.0614e-14	4
M_4_F_lqpt_Set_4	2.34584	0	0.25	905.955	52.5655	7.57297e-13	4
M_4_F_lqpt_Set_5	1.33706	0	0.25	924.611	71.2211	6.73386e-17	5
M_4_F_lqpt_Set_6	3.23285	0	0.0833333	919.07	65.6803	1.07508e-15	2
M_4_F_lqpt_Set_7	1.73201	0	0.291667	876.607	23.2169	1.78749e-06	7
M_4_F_lqpt_Set_8	1.73438	0	0.291667	890.188	36.7978	2.00993e-09	7
M_4_F_lqpt_Set_9	2.30361	0	0.0833333	883.211	29.8212	6.57859e-08	5
M_4_F_lqpth_Set_1	1.55405	0	0.25	886.271	32.8811	1.42456e-08	7
M_4_F_lqpth_Set_10	2.01022	0	0.25	927.027	73.6373	2.01186e-17	13
M_4_F_lqpth_Set_11	1.63983	0	0.125	873.041	19.6514	1.06286e-05	8
M_4_F_lqpth_Set_2	1.99249	0	0.0833333	879.92	26.5302	3.4101e-07	6
M_4_F_lqpth_Set_3	1.43626	0	0.0833333	913.025	59.6348	2.20897e-14	5
M_4_F_lqpth_Set_4	1.85885	0	0.25	908.407	55.0174	2.22251e-13	7
M_4_F_lqpth_Set_5	1.3984	0	0.25	967.392	114.002	3.45586e-26	19
M_4_F_lqpth_Set_6	2.24281	0	0.0833333	938.476	85.0856	6.57084e-20	10
M_4_F_lqpth_Set_7	1.61165	0	0.125	873.09	19.7	1.03737e-05	8
M_4_F_lqpth_Set_8	1.62413	0	0.25	900.35	46.9605	1.24852e-11	12
M_4_F_lqpth_Set_9	1.99774	0	0.0833333	879.877	26.4867	3.48514e-07	6
M_4_F_lqph_Set_1	1.54197	0	0.25	889.165	35.7755	3.35101e-09	8
M_4_F_lqph_Set_10	2.0099	0	0.25	927.027	73.6373	2.01186e-17	13
M_4_F_lqph_Set_11	1.63753	0	0.125	873.037	19.6466	1.06542e-05	8
M_4_F_lqph_Set_2	1.99237	0	0.0833333	879.89	26.5005	3.46114e-07	6
M_4_F_lqph_Set_3	1.43628	0	0.0833333	910.54	57.1505	7.64984e-14	4
M_4_F_lqph_Set_4	1.85882	0	0.25	908.407	55.0174	2.22251e-13	7
M_4_F_lqph_Set_5	1.41673	0	0.25	967.392	114.002	3.45586e-26	19
M_4_F_lqph_Set_6	2.24308	0	0.0833333	938.476	85.0856	6.57084e-20	10
M_4_F_lqph_Set_7	1.5845	0	0.125	873.085	19.6949	1.04001e-05	8
M_4_F_lqph_Set_8	1.62411	0	0.25	907.956	54.5662	2.78499e-13	14
M_4_F_lqph_Set_9	1.99773	0	0.0833333	879.847	26.4571	3.53713e-07	6
M_5_F_lq_Set_1	1.87125	0	0.166667	887.271	33.8809	8.64129e-09	4
M_5_F_lq_Set_10	2.13498	0	0.375	902.275	48.8853	4.76893e-12	4
M_5_F_lq_Set_11	2.00056	0	0.125	865.393	12.0035	0.000486627	4
M_5_F_lq_Set_2	2.00149	0	0.0833333	871.08	17.6901	2.83383e-05	3
M_5_F_lq_Set_3	2.0002	0	0.125	904.956	51.5665	1.24799e-12	3
M_5_F_lq_Set_4	2.13816	0	0.375	901.393	48.0029	7.41347e-12	3
M_5_F_lq_Set_5	1.52691	0	0.25	915.27	61.88	7.18884e-15	4
M_5_F_lq_Set_6	2.68977	0	0.0833333	915.914	62.5242	5.20931e-15	2
M_5_F_lq_Set_7	2.00052	0	0.125	865.499	12.1089	0.000461653	4
M_5_F_lq_Set_8	1.87129	0	0.166667	889.425	36.0348	2.94355e-09	5
M_5_F_lq_Set_9	2.00157	0	0.0833333	870.998	17.6079	2.95277e-05	3
M_5_F_lp_Set_1	1.49526	0	0.25	927.917	74.5267	1.28964e-17	3
M_5_F_lp_Set_10	1.44936	0	0.25	912.069	58.6789	3.56268e-14	2
M_5_F_lp_Set_11	1.49642	0	0.25	912.203	58.8128	3.33184e-14	5
M_5_F_lp_Set_2	1.56225	0	0.0833333	915.59	62.2004	6.1247e-15	2
M_5_F_lp_Set_3	1.56219	0	0.0833333	939.5	86.1104	3.93631e-20	2
M_5_F_lp_Set_4	1.44518	0	0.25	912.108	58.7179	3.49376e-14	2
M_5_F_lp_Set_5	1.44726	0	0.25	940.189	86.7988	2.79003e-20	2
M_5_F_lp_Set_6	NA	NA	0	918.775	65.3849	1.24619e-15	1
M_5_F_lp_Set_7	1.50052	0	0.25	912.861	59.4715	2.39693e-14	4
M_5_F_lp_Set_8	1.50516	0	0.25	916.695	63.3051	3.52527e-15	4
M_5_F_lp_Set_9	1.56219	0	0.0833333	917.626	64.2363	2.21303e-15	3
M_5_F_q_Set_1	1.92912	0	0.0833333	929.746	76.3559	5.16725e-18	2
M_5_F_q_Set_10	4.42654	0	0.125	933.709	80.3188	7.12393e-19	3
M_5_F_q_Set_11	2.01994	0	0.125	921.82	68.4301	2.71845e-16	4
M_5_F_q_Set_2	1.98815	0	0.0833333	922.216	68.8261	2.23011e-16	2
M_5_F_q_Set_3	2.14726	0	0.125	928.496	75.1059	9.65379e-18	2
M_5_F_q_Set_4	NA	NA	0	933.351	79.9614	8.51768e-19	2
M_5_F_q_Set_5	4.42654	0	0.125	937.234	83.8444	1.22223e-19	2
M_5_F_q_Set_6	4.99061	0	0.125	937.613	84.2234	1.01121e-19	2
M_5_F_q_Set_7	1.92953	0	0.0833333	919.57	66.1804	8.37205e-16	3
M_5_F_q_Set_8	2.0198	0	0.125	926.583	73.1929	2.51241e-17	3
M_5_F_q_Set_9	2.16948	0	0.125	923.96	70.5703	9.32362e-17	3
M_5_F_qp_Set_1	1.97009	0	0.0416667	927.628	74.2384	1.48962e-17	2
M_5_F_qp_Set_10	NA	NA	0	941.816	88.4257	1.23688e-20	2
M_5_F_qp_Set_11	1.97021	0	0.0416667	915.315	61.9249	7.02938e-15	4
M_5_F_qp_Set_2	NA	NA	0	924.204	70.8143	8.25295e-17	3
M_5_F_qp_Set_3	NA	NA	0	938.535	85.1447	6.37964e-20	2
M_5_F_qp_Set_4	NA	NA	0	947.165	93.7746	8.52757e-22	3
M_5_F_qp_Set_5	NA	NA	0	946.913	93.5235	9.66839e-22	1
M_5_F_qp_Set_6	NA	NA	0	944.002	90.6124	4.14465e-21	2
M_5_F_qp_Set_7	1.97021	0	0.0416667	915.324	61.9342	6.99652e-15	4
M_5_F_qp_Set_8	1.97009	0	0.0416667	927.621	74.2306	1.49543e-17	2
M_5_F_qp_Set_9	NA	NA	0	924.196	70.8065	8.28502e-17	3
M_5_F_lqp_Set_1	1.50296	0	0.25	900.996	47.6065	9.03881e-12	5
M_5_F_lqp_Set_10	1.44474	0	0.25	913.02	59.6302	2.2141e-14	3
M_5_F_lqp_Set_11	1.49783	0	0.25	880.45	27.0601	2.61633e-07	5
M_5_F_lqp_Set_2	1.56222	0	0.0833333	888.368	34.9784	4.99197e-09	4
M_5_F_lqp_Set_3	1.56213	0	0.0833333	917.414	64.0239	2.46106e-15	2
M_5_F_lqp_Set_4	1.44781	0	0.25	913.059	59.6687	2.17183e-14	3
M_5_F_lqp_Set_5	1.4465	0	0.25	930.962	77.5724	2.81249e-18	3
M_5_F_lqp_Set_6	NA	NA	0	918.775	65.3849	1.24619e-15	1
M_5_F_lqp_Set_7	1.49143	0	0.25	880.504	27.1145	2.54623e-07	5
M_5_F_lqp_Set_8	1.49958	0	0.25	903.584	50.1945	2.47821e-12	6
M_5_F_lqp_Set_9	1.56216	0	0.0833333	888.319	34.9291	5.11643e-09	4
M_5_F_lqpt_Set_1	1.83893	0	0.291667	898.746	45.3565	2.78416e-11	6
M_5_F_lqpt_Set_10	1.3373	0	0.25	912.181	58.7914	3.36781e-14	4
M_5_F_lqpt_Set_11	1.82819	0	0.291667	882.627	29.237	8.81032e-08	6
M_5_F_lqpt_Set_2	1.55701	0	0.0833333	888.268	34.8782	5.24847e-09	4
M_5_F_lqpt_Set_3	1.55686	0	0.0833333	914.826	61.4365	8.97334e-15	2
M_5_F_lqpt_Set_4	1.33718	0	0.25	912.218	58.8278	3.30693e-14	4
M_5_F_lqpt_Set_5	1.33706	0	0.25	933.013	79.6231	1.00878e-18	5
M_5_F_lqpt_Set_6	NA	NA	0	918.775	65.3849	1.24619e-15	1
M_5_F_lqpt_Set_7	1.84008	0	0.291667	882.683	29.2928	8.56788e-08	6
M_5_F_lqpt_Set_8	1.81113	0	0.291667	898.733	45.3435	2.80233e-11	6
M_5_F_lqpt_Set_9	1.55704	0	0.0833333	888.221	34.8309	5.37401e-09	4
M_5_F_lqpth_Set_1	1.52367	0	0.25	888.943	35.5527	3.74587e-09	6
M_5_F_lqpth_Set_10	1.81453	0	0.25	905.397	52.0073	1.0011e-12	5
M_5_F_lqpth_Set_11	1.58231	0	0.25	879.416	26.0258	4.3884e-07	8
M_5_F_lqpth_Set_2	1.83212	0	0.0833333	882.238	28.8481	1.07016e-07	5
M_5_F_lqpth_Set_3	1.4357	0	0.0833333	913.835	60.4453	1.473e-14	4
M_5_F_lqpth_Set_4	1.81329	0	0.25	905.431	52.0413	9.84263e-13	5
M_5_F_lqpth_Set_5	1.33682	0	0.25	967.137	113.747	3.92463e-26	18
M_5_F_lqpth_Set_6	1.90338	0	0.0833333	929.989	76.5989	4.57593e-18	6
M_5_F_lqpth_Set_7	1.58279	0	0.25	879.457	26.0671	4.29864e-07	8
M_5_F_lqpth_Set_8	1.49282	0	0.25	886.327	32.9366	1.38558e-08	5
M_5_F_lqpth_Set_9	1.83216	0	0.0833333	882.201	28.811	1.09016e-07	5
M_5_F_lqph_Set_1	1.52514	0	0.25	891.666	38.2765	9.59589e-10	7
M_5_F_lqph_Set_10	1.81429	0	0.25	905.397	52.0073	1.0011e-12	5
M_5_F_lqph_Set_11	1.57763	0	0.25	879.421	26.0307	4.37756e-07	8
M_5_F_lqph_Set_2	1.83201	0	0.0833333	884.794	31.4036	2.98217e-08	6
M_5_F_lqph_Set_3	1.4357	0	0.0833333	921.633	68.2432	2.98467e-16	7
M_5_F_lqph_Set_4	1.81313	0	0.25	905.431	52.0413	9.84263e-13	5
M_5_F_lqph_Set_5	1.33921	0	0.25	967.137	113.747	3.92463e-26	18
M_5_F_lqph_Set_6	1.90342	0	0.0833333	929.989	76.5989	4.57593e-18	6
M_5_F_lqph_Set_7	1.57514	0	0.25	879.462	26.0721	4.28782e-07	8
M_5_F_lqph_Set_8	1.48923	0	0.25	891.653	38.2629	9.66139e-10	7
M_5_F_lqph_Set_9	1.8321	0	0.0833333	884.756	31.3665	3.03802e-08	6
M_6_F_lq_Set_1	1.62825	0	0.208333	889.987	36.5967	2.22254e-09	4
M_6_F_lq_Set_10	2.13596	0	0.375	904.259	50.8691	1.76867e-12	4
M_6_F_lq_Set_11	2.00405	0	0.166667	867.631	14.2407	0.000159	4
M_6_F_lq_Set_2	2.00105	0	0.0833333	873.261	19.8708	9.52427e-06	3
M_6_F_lq_Set_3	1.89956	0	0.0833333	907.187	53.7973	4.09071e-13	3
M_6_F_lq_Set_4	2.12632	0	0.375	903.098	49.7082	3.16037e-12	3
M_6_F_lq_Set_5	1.48062	0	0.25	917.714	64.3237	2.11846e-15	4
M_6_F_lq_Set_6	2.61358	0	0.0833333	916.627	63.2367	3.64804e-15	2
M_6_F_lq_Set_7	2.00359	0	0.166667	867.727	14.3371	0.000151521	4
M_6_F_lq_Set_8	1.61896	0	0.208333	889.97	36.5803	2.24088e-09	4
M_6_F_lq_Set_9	2.00118	0	0.0833333	873.185	19.7948	9.89315e-06	3
M_6_F_lp_Set_1	1.4987	0	0.25	929.584	76.1941	5.60255e-18	3
M_6_F_lp_Set_10	1.46161	0	0.25	914.819	61.4291	9.00671e-15	2
M_6_F_lp_Set_11	1.50134	0	0.25	915.603	62.2134	6.08486e-15	4
M_6_F_lp_Set_2	1.55812	0	0.0833333	917.761	64.3706	2.06936e-15	2
M_6_F_lp_Set_3	1.55801	0	0.0833333	938.828	85.4377	5.51019e-20	1
M_6_F_lp_Set_4	1.46026	0	0.25	914.851	61.4614	8.86263e-15	2
M_6_F_lp_Set_5	1.46482	0	0.25	939.012	85.6219	5.02547e-20	1
M_6_F_lp_Set_6	NA	NA	0	920.768	67.3776	4.60119e-16	1
M_6_F_lp_Set_7	1.49401	0	0.25	915.628	62.2385	6.00904e-15	4
M_6_F_lp_Set_8	1.49196	0	0.25	925.199	71.8091	5.0186e-17	4
M_6_F_lp_Set_9	1.55817	0	0.0833333	917.738	64.3477	2.09312e-15	2
M_6_F_q_Set_1	1.89105	0	0.0833333	930.869	77.479	2.947e-18	2
M_6_F_q_Set_10	NA	NA	0	935.188	81.7984	3.39961e-19	3
M_6_F_q_Set_11	1.89214	0	0.0833333	923.627	70.2371	1.1014e-16	4
M_6_F_q_Set_2	1.93094	0	0.0833333	923.586	70.196	1.12426e-16	2
M_6_F_q_Set_3	1.90825	0	0.0833333	929.578	76.1877	5.62058e-18	2
M_6_F_q_Set_4	NA	NA	0	934.698	81.3078	4.34483e-19	2
M_6_F_q_Set_5	NA	NA	0	938.53	85.1399	6.39504e-20	2
M_6_F_q_Set_6	NA	NA	0	938.384	84.9937	6.87992e-20	2
M_6_F_q_Set_7	1.8915	0	0.0833333	921.399	68.0088	3.3559e-16	3
M_6_F_q_Set_8	1.89132	0	0.0833333	928.093	74.7026	1.18102e-17	3
M_6_F_q_Set_9	1.94034	0	0.0833333	925.302	71.9124	4.76591e-17	3
M_6_F_qp_Set_1	NA	NA	0	931.559	78.1691	2.08704e-18	2
M_6_F_qp_Set_10	NA	NA	0	945.525	92.1346	1.93621e-21	1
M_6_F_qp_Set_11	NA	NA	0	924.349	70.9595	7.67497e-17	4
M_6_F_qp_Set_2	NA	NA	0	928.895	75.5046	7.9087e-18	2
M_6_F_qp_Set_3	NA	NA	0	939.126	85.7358	4.74713e-20	1
M_6_F_qp_Set_4	NA	NA	0	945.532	92.142	1.92908e-21	1
M_6_F_qp_Set_5	NA	NA	0	944.979	91.589	2.54353e-21	0
M_6_F_qp_Set_6	NA	NA	0	944.979	91.589	2.54353e-21	0
M_6_F_qp_Set_7	NA	NA	0	924.357	70.9674	7.64449e-17	4
M_6_F_qp_Set_8	NA	NA	0	931.552	78.1617	2.09478e-18	2
M_6_F_qp_Set_9	NA	NA	0	928.887	75.4972	7.93821e-18	2
M_6_F_lqp_Set_1	1.49277	0	0.25	910.988	57.5977	6.11707e-14	5
M_6_F_lqp_Set_10	1.47174	0	0.25	914.819	61.4291	9.00671e-15	2
M_6_F_lqp_Set_11	1.5067	0	0.25	889.007	35.6171	3.62728e-09	5
M_6_F_lqp_Set_2	1.55813	0	0.0833333	893.36	39.9696	4.11568e-10	3
M_6_F_lqp_Set_3	1.55802	0	0.0833333	922.539	69.1486	1.89806e-16	2
M_6_F_lqp_Set_4	1.46483	0	0.25	914.851	61.4614	8.86263e-15	2
M_6_F_lqp_Set_5	1.46452	0	0.25	935.204	81.8145	3.37231e-19	2
M_6_F_lqp_Set_6	NA	NA	0	920.768	67.3776	4.60119e-16	1
M_6_F_lqp_Set_7	1.4946	0	0.25	889.051	35.6606	3.54916e-09	5
M_6_F_lqp_Set_8	1.49965	0	0.25	910.977	57.5874	6.14856e-14	5
M_6_F_lqp_Set_9	1.55817	0	0.0833333	893.32	39.9304	4.19708e-10	3
M_6_F_lqpt_Set_1	1.33718	0	0.25	905.676	52.286	8.70891e-13	5
M_6_F_lqpt_Set_10	1.3373	0	0.25	915.992	62.6019	5.01063e-15	3
M_6_F_lqpt_Set_11	1.33753	0	0.25	891.156	37.766	1.23866e-09	6
M_6_F_lqpt_Set_2	1.55812	0	0.0833333	895.609	42.2193	1.33636e-10	4
M_6_F_lqpt_Set_3	1.55802	0	0.0833333	919.322	65.9316	9.48111e-16	2
M_6_F_lqpt_Set_4	1.33718	0	0.25	916.024	62.6336	4.93196e-15	3
M_6_F_lqpt_Set_5	1.33706	0	0.25	935.319	81.9292	3.18444e-19	3
M_6_F_lqpt_Set_6	NA	NA	0	920.768	67.3776	4.60119e-16	1
M_6_F_lqpt_Set_7	1.33741	0	0.25	891.201	37.8105	1.21136e-09	6
M_6_F_lqpt_Set_8	1.3373	0	0.25	905.664	52.2742	8.76073e-13	5
M_6_F_lqpt_Set_9	1.55817	0	0.0833333	895.568	42.1782	1.36411e-10	4
M_6_F_lqpth_Set_1	1.49953	0	0.25	894.389	40.9987	2.46026e-10	6
M_6_F_lqpth_Set_10	1.36737	0	0.25	908.134	54.7438	2.54842e-13	5
M_6_F_lqpth_Set_11	1.51663	0	0.25	883.291	29.9012	6.32084e-08	7
M_6_F_lqpth_Set_2	1.84078	0	0.0833333	893.17	39.7803	4.52428e-10	7
M_6_F_lqpth_Set_3	1.43606	0	0.0833333	917.415	64.0253	2.45926e-15	4
M_6_F_lqpth_Set_4	1.36407	0	0.25	908.163	54.7731	2.51136e-13	5
M_6_F_lqpth_Set_5	1.34221	0	0.25	921.094	67.704	3.90842e-16	3
M_6_F_lqpth_Set_6	1.76798	0	0.0833333	920.768	67.3776	4.60119e-16	1
M_6_F_lqpth_Set_7	1.49827	0	0.25	883.323	29.9329	6.2214e-08	7
M_6_F_lqpth_Set_8	1.50325	0	0.25	894.376	40.9858	2.47608e-10	6
M_6_F_lqpth_Set_9	1.84075	0	0.0833333	893.14	39.7497	4.59395e-10	7
M_6_F_lqph_Set_1	1.49637	0	0.25	894.361	40.9706	2.49507e-10	6
M_6_F_lqph_Set_10	1.36518	0	0.25	908.134	54.7438	2.54842e-13	5
M_6_F_lqph_Set_11	1.50596	0	0.25	883.252	29.8618	6.44652e-08	7
M_6_F_lqph_Set_2	1.84067	0	0.0833333	890.572	37.182	1.65865e-09	6
M_6_F_lqph_Set_3	1.43606	0	0.0833333	917.396	64.0059	2.48327e-15	4
M_6_F_lqph_Set_4	1.35801	0	0.25	908.163	54.7731	2.51136e-13	5
M_6_F_lqph_Set_5	1.34065	0	0.25	921.094	67.704	3.90842e-16	3
M_6_F_lqph_Set_6	1.76803	0	0.0833333	920.768	67.3776	4.60119e-16	1
M_6_F_lqph_Set_7	1.50144	0	0.25	883.286	29.8963	6.33613e-08	7
M_6_F_lqph_Set_8	1.49923	0	0.25	894.348	40.9578	2.51108e-10	6
M_6_F_lqph_Set_9	1.84059	0	0.0833333	890.542	37.1516	1.68406e-09	6

## Sheet: 50km-PC_3
Model	Mean_AUC_ratio	pval_pROC	Omission_rate_at_5%	AICc	delta_AICc	W_AICc	N_parameters
M_0.1_F_lq_Set_1	1.52727	0	0.25	879.831	26.4415	3.56469e-07	4
M_0.1_F_lq_Set_10	2.69563	0	0.208333	900.988	47.5979	9.07784e-12	6
M_0.1_F_lq_Set_11	2.86078	0	0.25	864.963	11.5732	0.000603448	8
M_0.1_F_lq_Set_2	2.25638	0	0.0833333	865.878	12.4885	0.000381849	4
M_0.1_F_lq_Set_3	2.11626	0	0.25	901.294	47.9039	7.78999e-12	4
M_0.1_F_lq_Set_4	2.29572	0	0.208333	898.784	45.3939	2.73261e-11	4
M_0.1_F_lq_Set_5	1.42682	0	0.291667	909.09	55.6998	1.58001e-13	4
M_0.1_F_lq_Set_6	3.89649	0	0.125	918.477	65.0875	1.44594e-15	4
M_0.1_F_lq_Set_7	2.17543	0	0.125	862.391	9.00077	0.00218392	6
M_0.1_F_lq_Set_8	1.49656	0	0.291667	883.627	30.2375	5.34254e-08	6
M_0.1_F_lq_Set_9	2.33761	0	0.208333	868.326	14.9365	0.000112284	6
M_0.1_F_lp_Set_1	1.97722	0	0.0833333	924.445	71.0554	7.31564e-17	3
M_0.1_F_lp_Set_10	2.387	0	0.0416667	906.794	53.4043	4.97894e-13	6
M_0.1_F_lp_Set_11	2.83459	0	0.0416667	899.818	46.4276	1.62969e-11	10
M_0.1_F_lp_Set_2	3.69096	0	0.125	911.322	57.9317	5.17634e-14	3
M_0.1_F_lp_Set_3	2.00205	0	0.125	927.456	74.0659	1.62377e-17	3
M_0.1_F_lp_Set_4	2.22387	0	0.0833333	908.169	54.7786	2.50447e-13	3
M_0.1_F_lp_Set_5	1.8211	0	0.0833333	923.459	70.0694	1.19772e-16	3
M_0.1_F_lp_Set_6	4.12007	0	0.0833333	916.573	63.1834	3.74643e-15	3
M_0.1_F_lp_Set_7	2.71653	0	0.0833333	906.23	52.8401	6.60158e-13	6
M_0.1_F_lp_Set_8	2.1489	0	0.0416667	901.37	47.9798	7.49985e-12	6
M_0.1_F_lp_Set_9	3.55854	0	0.166667	914.988	61.5984	8.2756e-15	6
M_0.1_F_q_Set_1	2.72007	0	0.291667	926.973	73.5831	2.06715e-17	2
M_0.1_F_q_Set_10	2.17757	0	0.166667	930.392	77.002	3.74068e-18	3
M_0.1_F_q_Set_11	3.20022	0	0.291667	917.727	64.3374	2.104e-15	4
M_0.1_F_q_Set_2	170.948	0	0.25	919.245	65.8548	9.85214e-16	2
M_0.1_F_q_Set_3	3.47023	0	0.291667	926.082	72.6919	3.22767e-17	2
M_0.1_F_q_Set_4	2.16956	0	0.208333	930.121	76.7309	4.28372e-18	2
M_0.1_F_q_Set_5	2.10915	0	0.25	934.155	80.7649	5.69966e-19	2
M_0.1_F_q_Set_6	32.0725	0	0.0833333	936.099	82.7091	2.15619e-19	2
M_0.1_F_q_Set_7	2.99523	0	0.291667	915.526	62.1361	6.32481e-15	3
M_0.1_F_q_Set_8	2.6715	0	0.291667	923.171	69.7806	1.3838e-16	3
M_0.1_F_q_Set_9	4.06371	0	0.25	921.019	67.6294	4.05686e-16	3
M_0.1_F_qp_Set_1	3.0291	0	0.375	908.116	54.7263	2.57083e-13	3
M_0.1_F_qp_Set_10	2.37725	0	0.166667	925.842	72.4523	3.6384e-17	6
M_0.1_F_qp_Set_11	3.12897	0	0.166667	883.619	30.2289	5.36533e-08	9
M_0.1_F_qp_Set_2	121.217	0	0.25	904.107	50.717	1.90837e-12	3
M_0.1_F_qp_Set_3	3.41524	0	0.291667	926.604	73.2141	2.48596e-17	3
M_0.1_F_qp_Set_4	2.17688	0	0.208333	932.075	78.685	1.61248e-18	3
M_0.1_F_qp_Set_5	2.12837	0	0.25	935.475	82.0846	2.94629e-19	3
M_0.1_F_qp_Set_6	2.58131	0	0.291667	935.726	82.3365	2.59765e-19	3
M_0.1_F_qp_Set_7	2.85051	0	0.291667	886.474	33.0841	1.28707e-08	6
M_0.1_F_qp_Set_8	3.08349	0	0.375	907.721	54.331	3.13259e-13	6
M_0.1_F_qp_Set_9	2.30704	0	0.291667	899.613	46.2227	1.80551e-11	5
M_0.1_F_lqp_Set_1	2.78214	0	0.25	865.308	11.9177	0.000507975	5
M_0.1_F_lqp_Set_10	1.85464	0	0.25	887.836	34.4465	6.5127e-09	9
M_0.1_F_lqp_Set_11	2.93461	0	0.291667	859.675	6.28494	0.00849125	13
M_0.1_F_lqp_Set_2	2.14914	0	0.166667	864.78	11.3904	0.000661202	5
M_0.1_F_lqp_Set_3	2.07849	0	0.208333	895.898	42.5076	1.15699e-10	4
M_0.1_F_lqp_Set_4	2.46771	0	0.25	901.259	47.8693	7.92574e-12	5
M_0.1_F_lqp_Set_5	1.65762	0	0.25	892.792	39.402	5.46619e-10	5
M_0.1_F_lqp_Set_6	4.24955	0	0.291667	920.899	67.5091	4.30834e-16	5
M_0.1_F_lqp_Set_7	2.70755	0	0.166667	854.871	1.48119	0.093776	9
M_0.1_F_lqp_Set_8	2.57685	0	0.291667	861.161	7.77117	0.00403869	9
M_0.1_F_lqp_Set_9	2.35134	0	0.208333	869.879	16.4895	5.1652e-05	8
M_0.1_F_lqpt_Set_1	3.60751	0	0.833333	NA	NA	NA	69
M_0.1_F_lqpt_Set_10	3.1252	0	1	NA	NA	NA	82
M_0.1_F_lqpt_Set_11	2.51807	0	1	NA	NA	NA	105
M_0.1_F_lqpt_Set_2	2.3086	0	0.5	NA	NA	NA	71
M_0.1_F_lqpt_Set_3	2.89481	0	0.75	NA	NA	NA	72
M_0.1_F_lqpt_Set_4	2.72996	0	0.916667	NA	NA	NA	64
M_0.1_F_lqpt_Set_5	3.40149	0	0.875	NA	NA	NA	72
M_0.1_F_lqpt_Set_6	3.54508	0	0.791667	NA	NA	NA	62
M_0.1_F_lqpt_Set_7	2.69686	0	0.833333	NA	NA	NA	93
M_0.1_F_lqpt_Set_8	2.25151	0	1	NA	NA	NA	93
M_0.1_F_lqpt_Set_9	2.38999	0	0.875	NA	NA	NA	90
M_0.1_F_lqpth_Set_1	2.02758	0	0.833333	NA	NA	NA	77
M_0.1_F_lqpth_Set_10	2.42193	0	1	NA	NA	NA	91
M_0.1_F_lqpth_Set_11	1.98022	0	1	NA	NA	NA	114
M_0.1_F_lqpth_Set_2	1.78126	0	0.708333	NA	NA	NA	78
M_0.1_F_lqpth_Set_3	1.55518	0	0.916667	NA	NA	NA	78
M_0.1_F_lqpth_Set_4	2.34756	0	1	NA	NA	NA	73
M_0.1_F_lqpth_Set_5	2.096	0	0.958333	NA	NA	NA	72
M_0.1_F_lqpth_Set_6	2.17555	0	0.833333	NA	NA	NA	71
M_0.1_F_lqpth_Set_7	2.58584	0	0.916667	NA	NA	NA	110
M_0.1_F_lqpth_Set_8	2.29797	0	1	NA	NA	NA	104
M_0.1_F_lqpth_Set_9	1.75844	0	0.958333	NA	NA	NA	96
M_0.1_F_lqph_Set_1	1.94984	0	0.375	NA	NA	NA	90
M_0.1_F_lqph_Set_10	1.95408	0	0.375	NA	NA	NA	117
M_0.1_F_lqph_Set_11	2.50053	0	0.375	NA	NA	NA	151
M_0.1_F_lqph_Set_2	3.98492	0	0.458333	NA	NA	NA	95
M_0.1_F_lqph_Set_3	1.66734	0	0.333333	NA	NA	NA	116
M_0.1_F_lqph_Set_4	2.04604	0	0.416667	NA	NA	NA	119
M_0.1_F_lqph_Set_5	2.12722	0	0.291667	NA	NA	NA	142
M_0.1_F_lqph_Set_6	4.28561	0	0.291667	NA	NA	NA	136
M_0.1_F_lqph_Set_7	2.04836	0	0.416667	NA	NA	NA	116
M_0.1_F_lqph_Set_8	2.44565	0	0.375	NA	NA	NA	116
M_0.1_F_lqph_Set_9	2.25934	0	0.416667	NA	NA	NA	142
M_0.25_F_lq_Set_1	1.53308	0	0.25	879.854	26.464	3.52489e-07	4
M_0.25_F_lq_Set_10	2.57901	0	0.208333	901.025	47.6346	8.91264e-12	6
M_0.25_F_lq_Set_11	2.73945	0	0.25	865.009	11.6188	0.000589857	8
M_0.25_F_lq_Set_2	2.23908	0	0.0833333	865.922	12.5321	0.000373613	4
M_0.25_F_lq_Set_3	2.1002	0	0.25	898.939	45.5487	2.52909e-11	3
M_0.25_F_lq_Set_4	2.26778	0	0.208333	898.809	45.4189	2.69867e-11	4
M_0.25_F_lq_Set_5	1.39137	0	0.291667	909.108	55.7181	1.56565e-13	4
M_0.25_F_lq_Set_6	3.70167	0	0.125	918.495	65.1051	1.43332e-15	4
M_0.25_F_lq_Set_7	2.10634	0	0.125	862.436	9.04654	0.00213451	6
M_0.25_F_lq_Set_8	1.50291	0	0.291667	883.653	30.263	5.27481e-08	6
M_0.25_F_lq_Set_9	2.44478	0	0.208333	868.367	14.9772	0.000110022	6
M_0.25_F_lp_Set_1	1.97655	0	0.0833333	924.46	71.0703	7.26127e-17	3
M_0.25_F_lp_Set_10	2.34677	0	0.0416667	904.29	50.9002	1.74141e-12	5
M_0.25_F_lp_Set_11	2.63881	0	0.0416667	900.291	46.9006	1.28647e-11	10
M_0.25_F_lp_Set_2	3.58075	0	0.125	911.379	57.9888	5.03055e-14	3
M_0.25_F_lp_Set_3	2.01694	0	0.166667	927.52	74.1299	1.57259e-17	3
M_0.25_F_lp_Set_4	2.1841	0	0.0833333	908.224	54.8338	2.4363e-13	3
M_0.25_F_lp_Set_5	1.85671	0	0.125	923.52	70.1296	1.16218e-16	3
M_0.25_F_lp_Set_6	4.21944	0	0.0833333	914.373	60.9828	1.12585e-14	2
M_0.25_F_lp_Set_7	2.66754	0	0.0833333	906.321	52.9311	6.30795e-13	6
M_0.25_F_lp_Set_8	2.15691	0	0.0416667	901.495	48.1049	7.04516e-12	6
M_0.25_F_lp_Set_9	3.55523	0	0.166667	915.051	61.6611	8.0205e-15	6
M_0.25_F_q_Set_1	2.67995	0	0.291667	926.98	73.5897	2.06031e-17	2
M_0.25_F_q_Set_10	2.16687	0	0.166667	930.404	77.0136	3.71916e-18	3
M_0.25_F_q_Set_11	3.05849	0	0.291667	917.738	64.3485	2.09236e-15	4
M_0.25_F_q_Set_2	164.228	0	0.25	919.251	65.8609	9.82222e-16	2
M_0.25_F_q_Set_3	3.43386	0	0.291667	926.091	72.7006	3.2136e-17	2
M_0.25_F_q_Set_4	2.15503	0	0.208333	930.132	76.7421	4.25981e-18	2
M_0.25_F_q_Set_5	2.10198	0	0.25	934.164	80.774	5.67371e-19	2
M_0.25_F_q_Set_6	37.1413	0	0.0833333	936.107	82.7175	2.14712e-19	2
M_0.25_F_q_Set_7	2.90584	0	0.291667	915.534	62.1444	6.29849e-15	3
M_0.25_F_q_Set_8	2.68288	0	0.291667	923.181	69.7906	1.3769e-16	3
M_0.25_F_q_Set_9	4.00751	0	0.25	921.031	67.6408	4.03384e-16	3
M_0.25_F_qp_Set_1	2.90381	0	0.375	908.363	54.9732	2.27226e-13	3
M_0.25_F_qp_Set_10	2.25703	0	0.25	926.2	72.8105	3.04182e-17	6
M_0.25_F_qp_Set_11	2.62219	0	0.166667	881.462	28.0718	1.57767e-07	8
M_0.25_F_qp_Set_2	105.974	0	0.25	904.161	50.7711	1.85751e-12	3
M_0.25_F_qp_Set_3	3.39082	0	0.291667	926.643	73.2526	2.43848e-17	3
M_0.25_F_qp_Set_4	2.12899	0	0.208333	932.118	78.7282	1.57804e-18	3
M_0.25_F_qp_Set_5	2.11285	0	0.25	935.522	82.1325	2.87663e-19	3
M_0.25_F_qp_Set_6	2.36787	0	0.291667	935.753	82.363	2.56349e-19	3
M_0.25_F_qp_Set_7	2.83791	0	0.291667	884.32	30.9303	3.77825e-08	5
M_0.25_F_qp_Set_8	3.03236	0	0.375	908.005	54.6149	2.71808e-13	6
M_0.25_F_qp_Set_9	2.03488	0	0.291667	902.397	49.0068	4.48793e-12	6
M_0.25_F_lqp_Set_1	2.57478	0	0.25	865.675	12.2855	0.000422642	5
M_0.25_F_lqp_Set_10	2.55857	0	0.25	888.623	35.2335	4.39416e-09	9
M_0.25_F_lqp_Set_11	2.75781	0	0.25	856.64	3.25048	0.0387165	12
M_0.25_F_lqp_Set_2	2.09981	0	0.166667	864.991	11.6007	0.000595211	5
M_0.25_F_lqp_Set_3	2.04488	0	0.208333	898.684	45.2939	2.87261e-11	5
M_0.25_F_lqp_Set_4	2.33148	0	0.25	898.919	45.5288	2.55429e-11	4
M_0.25_F_lqp_Set_5	2.2727	0	0.25	893.324	39.9345	4.18855e-10	5
M_0.25_F_lqp_Set_6	3.89601	0	0.25	918.576	65.1864	1.37623e-15	4
M_0.25_F_lqp_Set_7	2.59752	0	0.166667	855.644	2.25389	0.0637239	9
M_0.25_F_lqp_Set_8	2.45234	0	0.333333	861.851	8.46083	0.00286077	9
M_0.25_F_lqp_Set_9	2.27452	0	0.166667	867.304	13.9138	0.000187232	7
M_0.25_F_lqpt_Set_1	2.29657	0	0.333333	1456.45	603.061	2.19123e-132	42
M_0.25_F_lqpt_Set_10	2.06435	0	0.458333	NA	NA	NA	65
M_0.25_F_lqpt_Set_11	2.50315	0	0.708333	NA	NA	NA	79
M_0.25_F_lqpt_Set_2	2.13338	0	0.458333	NA	NA	NA	52
M_0.25_F_lqpt_Set_3	2.11185	0	0.416667	2250.68	1397.29	7.5027e-305	45
M_0.25_F_lqpt_Set_4	2.78267	0	0.375	1296.11	442.718	1.44125e-97	40
M_0.25_F_lqpt_Set_5	1.89655	0	0.291667	NA	NA	NA	48
M_0.25_F_lqpt_Set_6	4.48617	0	0.375	3046.4	2193.01	0	46
M_0.25_F_lqpt_Set_7	2.25528	0	0.375	NA	NA	NA	68
M_0.25_F_lqpt_Set_8	1.99108	0	0.541667	NA	NA	NA	58
M_0.25_F_lqpt_Set_9	2.37118	0	0.583333	NA	NA	NA	63
M_0.25_F_lqpth_Set_1	1.98291	0	0.583333	NA	NA	NA	51
M_0.25_F_lqpth_Set_10	2.09451	0	0.458333	NA	NA	NA	74
M_0.25_F_lqpth_Set_11	1.78771	0	0.75	NA	NA	NA	86
M_0.25_F_lqpth_Set_2	2.27798	0	0.458333	NA	NA	NA	54
M_0.25_F_lqpth_Set_3	2.11414	0	0.458333	NA	NA	NA	50
M_0.25_F_lqpth_Set_4	2.47929	0	0.5	NA	NA	NA	48
M_0.25_F_lqpth_Set_5	2.00151	0	0.291667	NA	NA	NA	51
M_0.25_F_lqpth_Set_6	3.57973	0	0.375	NA	NA	NA	50
M_0.25_F_lqpth_Set_7	1.94408	0	0.541667	NA	NA	NA	72
M_0.25_F_lqpth_Set_8	1.83529	0	0.75	NA	NA	NA	66
M_0.25_F_lqpth_Set_9	2.61895	0	0.583333	NA	NA	NA	69
M_0.25_F_lqph_Set_1	2.74021	0	0.208333	NA	NA	NA	63
M_0.25_F_lqph_Set_10	2.1313	0	0.375	NA	NA	NA	90
M_0.25_F_lqph_Set_11	2.32623	0	0.375	NA	NA	NA	100
M_0.25_F_lqph_Set_2	2.45751	0	0.25	1041.73	188.335	2.49613e-42	32
M_0.25_F_lqph_Set_3	2.14248	0	0.25	NA	NA	NA	75
M_0.25_F_lqph_Set_4	2.50388	0	0.333333	NA	NA	NA	53
M_0.25_F_lqph_Set_5	1.81246	0	0.291667	NA	NA	NA	99
M_0.25_F_lqph_Set_6	5.67794	0	0.25	NA	NA	NA	103
M_0.25_F_lqph_Set_7	2.77285	0	0.166667	NA	NA	NA	82
M_0.25_F_lqph_Set_8	2.17505	0	0.291667	NA	NA	NA	87
M_0.25_F_lqph_Set_9	2.37053	0	0.375	NA	NA	NA	96
M_0.5_F_lq_Set_1	1.57644	0	0.25	879.932	26.5418	3.39048e-07	4
M_0.5_F_lq_Set_10	2.4716	0	0.208333	901.164	47.7742	8.31156e-12	6
M_0.5_F_lq_Set_11	2.51026	0	0.25	862.285	8.8953	0.00230218	7
M_0.5_F_lq_Set_2	2.16824	0	0.0833333	866.072	12.6822	0.000346597	4
M_0.5_F_lq_Set_3	2.09058	0	0.25	899.005	45.6153	2.44622e-11	3
M_0.5_F_lq_Set_4	2.20793	0	0.208333	898.904	45.5138	2.57358e-11	4
M_0.5_F_lq_Set_5	1.37159	0	0.25	909.169	55.7795	1.51834e-13	4
M_0.5_F_lq_Set_6	3.55843	0	0.125	918.565	65.1751	1.38399e-15	4
M_0.5_F_lq_Set_7	2.06602	0	0.166667	862.594	9.20415	0.00197276	6
M_0.5_F_lq_Set_8	1.51953	0	0.291667	883.74	30.3495	5.05136e-08	6
M_0.5_F_lq_Set_9	2.35607	0	0.166667	865.908	12.5185	0.000376165	5
M_0.5_F_lp_Set_1	1.97372	0	0.0833333	924.496	71.1063	7.13178e-17	3
M_0.5_F_lp_Set_10	2.37265	0	0.0833333	902.02	48.6303	5.4173e-12	4
M_0.5_F_lp_Set_11	2.28951	0	0.0416667	898.422	45.0324	3.27394e-11	9
M_0.5_F_lp_Set_2	3.37219	0	0.125	911.589	58.199	4.52882e-14	3
M_0.5_F_lp_Set_3	2.05738	0	0.125	927.733	74.3435	1.41331e-17	3
M_0.5_F_lp_Set_4	2.17777	0	0.0833333	908.414	55.0236	2.21564e-13	3
M_0.5_F_lp_Set_5	1.83058	0	0.166667	923.717	70.3269	1.05303e-16	3
M_0.5_F_lp_Set_6	4.32143	0	0.0833333	914.429	61.0392	1.09455e-14	2
M_0.5_F_lp_Set_7	2.49842	0	0.0833333	906.653	53.2629	5.34355e-13	6
M_0.5_F_lp_Set_8	2.13587	0	0.0416667	901.907	48.5171	5.7329e-12	6
M_0.5_F_lp_Set_9	3.76596	0	0.166667	910.165	56.7748	9.23092e-14	4
M_0.5_F_q_Set_1	2.62344	0	0.333333	927.003	73.6132	2.03621e-17	2
M_0.5_F_q_Set_10	2.13876	0	0.208333	930.436	77.0457	3.6598e-18	3
M_0.5_F_q_Set_11	2.86553	0	0.291667	917.774	64.3838	2.05577e-15	4
M_0.5_F_q_Set_2	137.509	0	0.25	919.273	65.8827	9.71596e-16	2
M_0.5_F_q_Set_3	3.30096	0	0.291667	926.114	72.724	3.17617e-17	2
M_0.5_F_q_Set_4	2.1368	0	0.208333	930.165	76.7746	4.19122e-18	2
M_0.5_F_q_Set_5	2.09121	0	0.25	934.192	80.802	5.59509e-19	2
M_0.5_F_q_Set_6	40.8028	0	0.0833333	936.126	82.7355	2.12782e-19	2
M_0.5_F_q_Set_7	2.86116	0	0.291667	915.565	62.1746	6.20408e-15	3
M_0.5_F_q_Set_8	2.62367	0	0.333333	923.211	69.8207	1.35628e-16	3
M_0.5_F_q_Set_9	3.70377	0	0.25	921.061	67.6706	3.97414e-16	3
M_0.5_F_qp_Set_1	2.65856	0	0.333333	909.033	55.6435	1.62514e-13	3
M_0.5_F_qp_Set_10	2.17985	0	0.291667	927.309	73.9194	1.74717e-17	6
M_0.5_F_qp_Set_11	2.37158	0	0.291667	882.665	29.2754	8.64269e-08	8
M_0.5_F_qp_Set_2	126.915	0	0.25	904.342	50.9519	1.69695e-12	3
M_0.5_F_qp_Set_3	3.04318	0	0.291667	926.773	73.383	2.2846e-17	3
M_0.5_F_qp_Set_4	2.09943	0	0.208333	932.253	78.8629	1.47528e-18	3
M_0.5_F_qp_Set_5	2.08141	0	0.25	935.689	82.2986	2.64734e-19	3
M_0.5_F_qp_Set_6	2.25717	0	0.333333	935.816	82.4257	2.48438e-19	3
M_0.5_F_qp_Set_7	2.66651	0	0.291667	885.164	31.7742	2.47774e-08	5
M_0.5_F_qp_Set_8	2.7558	0	0.333333	908.801	55.4113	1.82526e-13	6
M_0.5_F_qp_Set_9	2.05394	0	0.291667	902.958	49.5683	3.38933e-12	6
M_0.5_F_lqp_Set_1	2.25258	0	0.291667	866.68	13.2896	0.000255822	5
M_0.5_F_lqp_Set_10	2.34419	0	0.208333	890.953	37.5628	1.37111e-09	9
M_0.5_F_lqp_Set_11	2.38795	0	0.208333	855.084	1.69397	0.0843117	11
M_0.5_F_lqp_Set_2	2.06706	0	0.166667	865.682	12.2918	0.000421312	5
M_0.5_F_lqp_Set_3	2.06133	0	0.25	899.651	46.2609	1.77138e-11	5
M_0.5_F_lqp_Set_4	2.18244	0	0.208333	899.328	45.9376	2.08213e-11	4
M_0.5_F_lqp_Set_5	2.13742	0	0.25	894.897	41.5071	1.90798e-10	5
M_0.5_F_lqp_Set_6	3.7128	0	0.166667	918.881	65.4909	1.18185e-15	4
M_0.5_F_lqp_Set_7	2.39834	0	0.125	854.233	0.843027	0.129023	8
M_0.5_F_lqp_Set_8	2.22783	0	0.333333	860.774	7.38378	0.00490187	8
M_0.5_F_lqp_Set_9	2.27965	0	0.208333	865.367	11.9775	0.000493006	6
M_0.5_F_lqpt_Set_1	1.90248	0	0.25	867.585	14.1949	0.000162687	17
M_0.5_F_lqpt_Set_10	2.09566	0	0.333333	961.214	107.824	7.5857e-25	28
M_0.5_F_lqpt_Set_11	2.09501	0	0.333333	997.009	143.619	1.27985e-32	33
M_0.5_F_lqpt_Set_2	2.00984	0	0.375	884.006	30.6161	4.4211e-08	16
M_0.5_F_lqpt_Set_3	1.92047	0	0.333333	927.033	73.6435	2.00559e-17	22
M_0.5_F_lqpt_Set_4	2.39786	0	0.125	913.923	60.5326	1.41006e-14	16
M_0.5_F_lqpt_Set_5	1.73343	0	0.291667	921.824	68.4339	2.71329e-16	22
M_0.5_F_lqpt_Set_6	4.04398	0	0.208333	924.314	70.9241	7.81175e-17	16
M_0.5_F_lqpt_Set_7	2.2632	0	0.166667	871.257	17.8672	2.59372e-05	20
M_0.5_F_lqpt_Set_8	1.98092	0	0.458333	912.793	59.4032	2.48017e-14	27
M_0.5_F_lqpt_Set_9	2.07044	0	0.333333	900.76	47.3704	1.01713e-11	23
M_0.5_F_lqpth_Set_1	2.15761	0	0.25	883.933	30.5433	4.58492e-08	21
M_0.5_F_lqpth_Set_10	1.95641	0	0.333333	1304.28	450.894	2.41764e-99	40
M_0.5_F_lqpth_Set_11	2.28228	0	0.291667	NA	NA	NA	49
M_0.5_F_lqpth_Set_2	2.13783	0	0.166667	942.432	89.042	9.08869e-21	25
M_0.5_F_lqpth_Set_3	2.00267	0	0.333333	985.233	131.843	4.61627e-30	28
M_0.5_F_lqpth_Set_4	2.19405	0	0.25	987.449	134.059	1.52493e-30	27
M_0.5_F_lqpth_Set_5	1.74211	0	0.291667	963.593	110.203	2.30944e-25	27
M_0.5_F_lqpth_Set_6	3.6185	0	0.166667	1294.91	441.524	2.61787e-97	39
M_0.5_F_lqpth_Set_7	2.44626	0	0.125	956.609	103.219	7.58408e-24	30
M_0.5_F_lqpth_Set_8	2.08599	0	0.375	1018.86	165.468	2.30591e-37	34
M_0.5_F_lqpth_Set_9	2.17138	0	0.375	1105.75	252.36	3.12226e-56	36
M_0.5_F_lqph_Set_1	2.37736	0	0.208333	5443.41	4590.02	0	47
M_0.5_F_lqph_Set_10	2.43281	0	0.375	NA	NA	NA	48
M_0.5_F_lqph_Set_11	2.48898	0	0.25	NA	NA	NA	49
M_0.5_F_lqph_Set_2	2.17474	0	0.125	910.945	57.5551	6.24884e-14	18
M_0.5_F_lqph_Set_3	2.38899	0	0.25	NA	NA	NA	53
M_0.5_F_lqph_Set_4	2.40038	0	0.25	5482.15	4628.76	0	47
M_0.5_F_lqph_Set_5	1.6211	0	0.25	NA	NA	NA	56
M_0.5_F_lqph_Set_6	4.18299	0	0.208333	NA	NA	NA	86
M_0.5_F_lqph_Set_7	2.46236	0	0.125	1040.06	186.669	5.74198e-42	33
M_0.5_F_lqph_Set_8	2.2976	0	0.291667	NA	NA	NA	51
M_0.5_F_lqph_Set_9	2.31623	0	0.208333	2313.21	1459.82	1.98646009829515e-318	45
M_0.75_F_lq_Set_1	2.18985	0	0.25	880.057	26.6668	3.185e-07	4
M_0.75_F_lq_Set_10	2.38805	0	0.208333	901.396	48.0062	7.40142e-12	6
M_0.75_F_lq_Set_11	2.39233	0	0.25	862.511	9.12104	0.00205646	7
M_0.75_F_lq_Set_2	2.13327	0	0.125	866.311	12.9212	0.000307564	4
M_0.75_F_lq_Set_3	2.11948	0	0.25	899.11	45.7199	2.32152e-11	3
M_0.75_F_lq_Set_4	2.14913	0	0.208333	899.06	45.6697	2.38055e-11	4
M_0.75_F_lq_Set_5	1.36119	0	0.25	909.267	55.8775	1.44575e-13	4
M_0.75_F_lq_Set_6	3.3894	0	0.125	918.681	65.2913	1.30589e-15	4
M_0.75_F_lq_Set_7	2.0247	0	0.166667	862.844	9.45437	0.00174076	6
M_0.75_F_lq_Set_8	1.46921	0	0.291667	883.878	30.4877	4.71415e-08	6
M_0.75_F_lq_Set_9	2.31112	0	0.208333	866.115	12.7247	0.000339305	5
M_0.75_F_lp_Set_1	1.97197	0	0.0833333	924.546	71.1563	6.95545e-17	3
M_0.75_F_lp_Set_10	2.40347	0	0.0833333	902.266	48.8764	4.79008e-12	4
M_0.75_F_lp_Set_11	2.21302	0	0.0416667	899.534	46.1437	1.87825e-11	9
M_0.75_F_lp_Set_2	3.95959	0	0.125	911.934	58.5438	3.81158e-14	3
M_0.75_F_lp_Set_3	2.1532	0	0.125	928.081	74.6913	1.18775e-17	3
M_0.75_F_lp_Set_4	2.16367	0	0.0833333	906.258	52.8683	6.50907e-13	2
M_0.75_F_lp_Set_5	1.73364	0	0.208333	924.035	70.6452	8.98087e-17	3
M_0.75_F_lp_Set_6	4.21203	0	0.0833333	914.517	61.1271	1.04749e-14	2
M_0.75_F_lp_Set_7	2.39785	0	0.0833333	904.579	51.1888	1.50741e-12	5
M_0.75_F_lp_Set_8	2.08437	0	0.0416667	902.566	49.1763	4.1231e-12	6
M_0.75_F_lp_Set_9	3.80003	0	0.166667	910.285	56.8953	8.69099e-14	4
M_0.75_F_q_Set_1	2.54539	0	0.333333	927.042	73.652	1.99707e-17	2
M_0.75_F_q_Set_10	2.1155	0	0.208333	930.484	77.0939	3.57269e-18	3
M_0.75_F_q_Set_11	2.72676	0	0.291667	917.83	64.4398	1.99899e-15	4
M_0.75_F_q_Set_2	111.857	0	0.25	919.309	65.919	9.54133e-16	2
M_0.75_F_q_Set_3	3.20082	0	0.291667	926.149	72.7586	3.1218e-17	2
M_0.75_F_q_Set_4	2.11338	0	0.208333	930.214	76.8239	4.08911e-18	2
M_0.75_F_q_Set_5	2.07689	0	0.25	934.236	80.8456	5.47439e-19	2
M_0.75_F_q_Set_6	36.4706	0	0.125	936.149	82.7588	2.10323e-19	2
M_0.75_F_q_Set_7	2.79431	0	0.291667	915.615	62.2251	6.04946e-15	3
M_0.75_F_q_Set_8	2.54257	0	0.333333	923.258	69.8677	1.32481e-16	3
M_0.75_F_q_Set_9	3.62088	0	0.25	921.104	67.7139	3.88912e-16	3
M_0.75_F_qp_Set_1	2.71915	0	0.333333	909.886	56.4961	1.06108e-13	3
M_0.75_F_qp_Set_10	2.11632	0	0.291667	928.916	75.526	7.82482e-18	6
M_0.75_F_qp_Set_11	2.38029	0	0.291667	884.187	30.7971	4.03859e-08	8
M_0.75_F_qp_Set_2	85.294	0	0.291667	904.629	51.2392	1.46984e-12	3
M_0.75_F_qp_Set_3	2.83135	0	0.291667	926.983	73.5929	2.05704e-17	3
M_0.75_F_qp_Set_4	2.07636	0	0.208333	932.462	79.0717	1.32904e-18	3
M_0.75_F_qp_Set_5	2.04161	0	0.25	935.954	82.5642	2.31816e-19	3
M_0.75_F_qp_Set_6	2.19333	0	0.333333	935.903	82.5132	2.37804e-19	3
M_0.75_F_qp_Set_7	2.50808	0	0.291667	886.239	32.849	1.44764e-08	5
M_0.75_F_qp_Set_8	2.72372	0	0.333333	909.832	56.4419	1.09023e-13	6
M_0.75_F_qp_Set_9	2.63957	0	0.291667	903.75	50.3598	2.28161e-12	6
M_0.75_F_lqp_Set_1	2.08245	0	0.291667	867.959	14.5692	0.000134914	5
M_0.75_F_lqp_Set_10	2.14319	0	0.208333	890.885	37.4955	1.418e-09	8
M_0.75_F_lqp_Set_11	2.12071	0	0.208333	857.757	4.36709	0.0221527	11
M_0.75_F_lqp_Set_2	2.04411	0	0.0833333	866.727	13.3372	0.000249805	5
M_0.75_F_lqp_Set_3	2.06991	0	0.25	900.912	47.5217	9.4301e-12	5
M_0.75_F_lqp_Set_4	2.07312	0	0.208333	897.287	43.8969	5.77607e-11	3
M_0.75_F_lqp_Set_5	2.0683	0	0.25	894.105	40.7147	2.83559e-10	4
M_0.75_F_lqp_Set_6	3.70039	0	0.166667	914.517	61.1271	1.04749e-14	2
M_0.75_F_lqp_Set_7	2.12754	0	0.125	853.39	0	0.196666	7
M_0.75_F_lqp_Set_8	2.07162	0	0.333333	863.327	9.93705	0.0013675	8
M_0.75_F_lqp_Set_9	2.21188	0	0.25	866.557	13.167	0.000271988	6
M_0.75_F_lqpt_Set_1	2.15117	0	0.291667	860.807	7.41718	0.00482069	12
M_0.75_F_lqpt_Set_10	2.03331	0	0.208333	900	46.6103	1.48737e-11	17
M_0.75_F_lqpt_Set_11	2.19037	0	0.333333	875.188	21.7981	3.63348e-06	20
M_0.75_F_lqpt_Set_2	2.03042	0	0.25	877.586	24.1957	1.09572e-06	11
M_0.75_F_lqpt_Set_3	1.9607	0	0.291667	901.42	48.03	7.31378e-12	13
M_0.75_F_lqpt_Set_4	2.28991	0	0.166667	899.346	45.9562	2.06283e-11	10
M_0.75_F_lqpt_Set_5	2.00174	0	0.25	893.178	39.7877	4.5075e-10	12
M_0.75_F_lqpt_Set_6	3.83542	0	0.125	916.779	63.3893	3.38e-15	11
M_0.75_F_lqpt_Set_7	2.20497	0	0.25	853.925	0.534641	0.150533	13
M_0.75_F_lqpt_Set_8	2.05844	0	0.333333	875.634	22.2442	2.90707e-06	19
M_0.75_F_lqpt_Set_9	2.19232	0	0.25	886.476	33.0858	1.286e-08	17
M_0.75_F_lqpth_Set_1	2.18967	0	0.208333	877.667	24.2769	1.05213e-06	16
M_0.75_F_lqpth_Set_10	1.92009	0	0.25	907.837	54.4466	2.95658e-13	20
M_0.75_F_lqpth_Set_11	2.26309	0	0.25	918.629	65.2393	1.3403e-15	26
M_0.75_F_lqpth_Set_2	2.08866	0	0.166667	888.364	34.9741	5.00261e-09	14
M_0.75_F_lqpth_Set_3	1.98819	0	0.291667	1042.1	188.708	2.07175e-42	31
M_0.75_F_lqpth_Set_4	2.11992	0	0.125	949.479	96.0893	2.68043e-22	21
M_0.75_F_lqpth_Set_5	1.73111	0	0.291667	931.083	77.6927	2.64833e-18	21
M_0.75_F_lqpth_Set_6	3.42072	0	0.125	1011.59	158.201	8.72586e-36	27
M_0.75_F_lqpth_Set_7	2.28142	0	0.125	881.367	27.9768	1.65445e-07	19
M_0.75_F_lqpth_Set_8	2.19395	0	0.291667	914.912	61.5221	8.59766e-15	25
M_0.75_F_lqpth_Set_9	2.26107	0	0.25	908.839	55.449	1.79115e-13	21
M_0.75_F_lqph_Set_1	2.12287	0	0.208333	1009.34	155.949	2.69057e-35	30
M_0.75_F_lqph_Set_10	2.4128	0	0.25	1279.33	425.939	6.34381e-94	39
M_0.75_F_lqph_Set_11	2.27122	0	0.166667	918.734	65.3438	1.27204e-15	24
M_0.75_F_lqph_Set_2	2.08332	0	0.125	885.978	32.5883	1.64922e-08	12
M_0.75_F_lqph_Set_3	2.6228	0	0.25	1306.43	453.037	8.27808e-100	39
M_0.75_F_lqph_Set_4	2.23289	0	0.208333	1043.19	189.8	1.19975e-42	30
M_0.75_F_lqph_Set_5	2.14182	0	0.25	1243.73	390.344	3.40089e-86	38
M_0.75_F_lqph_Set_6	3.468	0	0.166667	NA	NA	NA	69
M_0.75_F_lqph_Set_7	2.21375	0	0.125	888.738	35.3485	4.14859e-09	18
M_0.75_F_lqph_Set_8	2.13087	0	0.291667	931.696	78.3065	1.94847e-18	24
M_0.75_F_lqph_Set_9	2.25433	0	0.208333	890.513	37.1233	1.70804e-09	14
M_1_F_lq_Set_1	2.15217	0	0.25	880.226	26.8357	2.92702e-07	4
M_1_F_lq_Set_10	2.28056	0	0.208333	901.714	48.3242	6.31349e-12	6
M_1_F_lq_Set_11	2.10501	0	0.25	862.819	9.42859	0.00176334	7
M_1_F_lq_Set_2	2.09614	0	0.125	866.63	13.2404	0.000262189	4
M_1_F_lq_Set_3	2.08717	0	0.25	899.25	45.8598	2.16472e-11	3
M_1_F_lq_Set_4	2.12591	0	0.208333	899.271	45.8811	2.1418e-11	4
M_1_F_lq_Set_5	2.11892	0	0.25	909.4	56.01	1.35304e-13	4
M_1_F_lq_Set_6	3.32618	0	0.125	918.839	65.4488	1.207e-15	4
M_1_F_lq_Set_7	2.01409	0	0.166667	863.175	9.78537	0.00147524	6
M_1_F_lq_Set_8	1.48178	0	0.291667	884.064	30.6742	4.29452e-08	6
M_1_F_lq_Set_9	2.31465	0	0.208333	866.4	13.0096	0.000294254	5
M_1_F_lp_Set_1	1.97526	0	0.0833333	924.611	71.2207	6.73505e-17	3
M_1_F_lp_Set_10	2.37116	0	0.125	902.608	49.218	4.03814e-12	4
M_1_F_lp_Set_11	2.21942	0	0.0416667	901.077	47.6875	8.67985e-12	9
M_1_F_lp_Set_2	4.42842	0	0.125	912.401	59.0114	3.01696e-14	3
M_1_F_lp_Set_3	2.71851	0	0.166667	928.563	75.1735	9.33259e-18	3
M_1_F_lp_Set_4	2.15726	0	0.0833333	906.364	52.9736	6.17531e-13	2
M_1_F_lp_Set_5	2.07371	0	0.208333	924.475	71.0851	7.20761e-17	3
M_1_F_lp_Set_6	4.0777	0	0.0833333	914.637	61.2475	9.86297e-15	2
M_1_F_lp_Set_7	2.27306	0	0.0833333	905.118	51.7277	1.15131e-12	5
M_1_F_lp_Set_8	2.03331	0	0.0416667	903.465	50.0754	2.63027e-12	6
M_1_F_lp_Set_9	3.77856	0	0.166667	910.449	57.0589	8.00852e-14	4
M_1_F_q_Set_1	2.49037	0	0.333333	927.096	73.7058	1.94411e-17	2
M_1_F_q_Set_10	2.10415	0	0.208333	930.548	77.1579	3.46023e-18	3
M_1_F_q_Set_11	2.71615	0	0.291667	917.906	64.5162	1.92404e-15	4
M_1_F_q_Set_2	96.7725	0	0.25	919.36	65.9698	9.30202e-16	2
M_1_F_q_Set_3	2.98437	0	0.291667	926.194	72.8042	3.05135e-17	2
M_1_F_q_Set_4	2.10231	0	0.208333	930.28	76.8897	3.95685e-18	2
M_1_F_q_Set_5	2.06701	0	0.25	934.295	80.9047	5.31486e-19	2
M_1_F_q_Set_6	45.6434	0	0.125	936.177	82.7874	2.07331e-19	2
M_1_F_q_Set_7	2.74553	0	0.291667	915.686	62.2958	5.83951e-15	3
M_1_F_q_Set_8	2.48937	0	0.333333	923.321	69.9313	1.28335e-16	3
M_1_F_q_Set_9	3.50778	0	0.25	921.16	67.7705	3.78054e-16	3
M_1_F_qp_Set_1	2.58563	0	0.333333	910.843	57.4526	6.57751e-14	3
M_1_F_qp_Set_10	2.08869	0	0.291667	926.959	73.5687	2.08202e-17	5
M_1_F_qp_Set_11	2.45386	0	0.291667	888.954	35.5643	3.7243e-09	9
M_1_F_qp_Set_2	69.3282	0	0.291667	905.017	51.6266	1.21104e-12	3
M_1_F_qp_Set_3	2.66553	0	0.291667	927.269	73.8793	1.78256e-17	3
M_1_F_qp_Set_4	2.0598	0	0.208333	932.74	79.3505	1.15605e-18	3
M_1_F_qp_Set_5	2.02428	0	0.25	936.311	82.9206	1.9398e-19	3
M_1_F_qp_Set_6	2.17623	0	0.291667	936.018	82.6278	2.24559e-19	3
M_1_F_qp_Set_7	2.42556	0	0.291667	887.452	34.0621	7.8929e-09	5
M_1_F_qp_Set_8	2.58109	0	0.333333	908.408	55.0182	2.22162e-13	5
M_1_F_qp_Set_9	2.67821	0	0.291667	904.709	51.3191	1.41229e-12	6
M_1_F_lqp_Set_1	2.0428	0	0.25	869.399	16.0087	6.56886e-05	5
M_1_F_lqp_Set_10	2.07231	0	0.208333	888.056	34.6663	5.83481e-09	6
M_1_F_lqp_Set_11	2.01672	0	0.208333	857.525	4.13523	0.0248757	10
M_1_F_lqp_Set_2	2.02557	0	0.125	868.065	14.6749	0.000127972	5
M_1_F_lqp_Set_3	2.01299	0	0.291667	902.34	48.9497	4.61776e-12	5
M_1_F_lqp_Set_4	2.02135	0	0.208333	897.71	44.3203	4.67401e-11	3
M_1_F_lqp_Set_5	2.04587	0	0.25	895.452	42.0622	1.4456e-10	4
M_1_F_lqp_Set_6	3.97659	0	0.125	914.637	61.2475	9.86297e-15	2
M_1_F_lqp_Set_7	2.01607	0	0.166667	855.058	1.66826	0.0854024	7
M_1_F_lqp_Set_8	2.01301	0	0.291667	866.322	12.932	0.000305896	8
M_1_F_lqp_Set_9	2.1548	0	0.25	868.1	14.7097	0.000125765	6
M_1_F_lqpt_Set_1	2.09565	0	0.25	872.302	18.9122	1.53812e-05	11
M_1_F_lqpt_Set_10	2.00411	0	0.208333	899.175	45.7851	2.24706e-11	15
M_1_F_lqpt_Set_11	2.00464	0	0.375	868.652	15.2618	9.54269e-05	16
M_1_F_lqpt_Set_2	2.02338	0	0.166667	870.938	17.5484	3.04183e-05	7
M_1_F_lqpt_Set_3	2.00652	0	0.291667	900.153	46.7633	1.37786e-11	8
M_1_F_lqpt_Set_4	2.19466	0	0.125	896.648	43.2579	7.95046e-11	8
M_1_F_lqpt_Set_5	1.99976	0	0.291667	892.694	39.3044	5.7397e-10	10
M_1_F_lqpt_Set_6	3.74883	0	0.125	914.093	60.7034	1.29465e-14	7
M_1_F_lqpt_Set_7	2.05649	0	0.25	856.339	2.94879	0.0450202	10
M_1_F_lqpt_Set_8	1.87377	0	0.333333	865.402	12.0125	0.00048446	13
M_1_F_lqpt_Set_9	2.12538	0	0.208333	874.902	21.5118	4.1928e-06	11
M_1_F_lqpth_Set_1	2.07266	0	0.208333	883.122	29.7323	6.87759e-08	14
M_1_F_lqpth_Set_10	2.03899	0	0.208333	948.31	94.9202	4.80921e-22	24
M_1_F_lqpth_Set_11	2.16562	0	0.208333	916.369	62.9786	4.15051e-15	24
M_1_F_lqpth_Set_2	2.05828	0	0.166667	881.496	28.106	1.55091e-07	11
M_1_F_lqpth_Set_3	2.03224	0	0.291667	1027.52	174.13	3.03281e-39	29
M_1_F_lqpth_Set_4	2.08983	0	0.166667	909.927	56.5367	1.0398e-13	12
M_1_F_lqpth_Set_5	1.64747	0	0.25	943.342	89.9518	5.76695e-21	21
M_1_F_lqpth_Set_6	3.20379	0	0.125	1133.27	279.879	3.3022e-62	34
M_1_F_lqpth_Set_7	2.14893	0	0.125	875.541	22.1512	3.04547e-06	15
M_1_F_lqpth_Set_8	2.05223	0	0.25	881.993	28.6026	1.20991e-07	17
M_1_F_lqpth_Set_9	2.20291	0	0.208333	888.462	35.0722	4.76311e-09	15
M_1_F_lqph_Set_1	2.04799	0	0.208333	898.383	44.9926	3.33968e-11	16
M_1_F_lqph_Set_10	2.2535	0	0.208333	953.91	100.52	2.92469e-23	23
M_1_F_lqph_Set_11	2.13309	0	0.166667	895.647	42.2566	1.31168e-10	20
M_1_F_lqph_Set_2	2.05554	0	0.125	890.485	37.0947	1.73266e-09	13
M_1_F_lqph_Set_3	2.09969	0	0.25	991.272	137.882	2.25449e-31	25
M_1_F_lqph_Set_4	2.16715	0	0.208333	912.033	58.6432	3.62678e-14	11
M_1_F_lqph_Set_5	2.06994	0	0.25	1093.7	240.312	1.29011e-53	33
M_1_F_lqph_Set_6	2.95599	0	0.166667	NA	NA	NA	53
M_1_F_lqph_Set_7	2.07304	0	0.166667	876.963	23.5733	1.49576e-06	15
M_1_F_lqph_Set_8	2.00679	0	0.25	914.894	61.5041	8.67532e-15	21
M_1_F_lqph_Set_9	2.19393	0	0.125	884.324	30.9341	3.77111e-08	12
M_2_F_lq_Set_1	2.0927	0	0.25	881.288	27.8976	1.72125e-07	4
M_2_F_lq_Set_10	2.05624	0	0.208333	897.98	44.5899	4.08456e-11	4
M_2_F_lq_Set_11	2.00779	0	0.25	864.817	11.4272	0.000649146	7
M_2_F_lq_Set_2	2.04424	0	0.166667	868.576	15.186	9.91151e-05	4
M_2_F_lq_Set_3	1.9938	0	0.291667	900.116	46.7265	1.40343e-11	3
M_2_F_lq_Set_4	2.02844	0	0.208333	897.609	44.2188	4.91746e-11	3
M_2_F_lq_Set_5	2.04995	0	0.25	910.243	56.8528	8.87785e-14	4
M_2_F_lq_Set_6	3.91325	0	0.125	914.608	61.2181	1.00091e-14	2
M_2_F_lq_Set_7	2.00573	0	0.125	862.333	8.9435	0.00224736	5
M_2_F_lq_Set_8	2.10308	0	0.25	885.238	31.8479	2.3881e-08	6
M_2_F_lq_Set_9	2.13978	0	0.25	868.276	14.8862	0.000115142	5
M_2_F_lp_Set_1	2.00835	0	0.0833333	925.017	71.6275	5.49562e-17	3
M_2_F_lp_Set_10	2.18313	0	0.0833333	905.019	51.629	1.20955e-12	4
M_2_F_lp_Set_11	2.25761	0	0.0833333	906.271	52.8812	6.46729e-13	8
M_2_F_lp_Set_2	5.64056	0	0.125	911.669	58.279	4.35121e-14	2
M_2_F_lp_Set_3	2.82506	0	0.166667	931.825	78.4346	1.82754e-18	3
M_2_F_lp_Set_4	2.12731	0	0.0833333	907.067	53.6773	4.34371e-13	2
M_2_F_lp_Set_5	2.08384	0	0.208333	927.473	74.0826	1.61022e-17	3
M_2_F_lp_Set_6	4.04166	0	0.166667	915.466	62.0765	6.51611e-15	2
M_2_F_lp_Set_7	2.10597	0	0.0833333	908.7	55.3101	1.91995e-13	5
M_2_F_lp_Set_8	2.06436	0	0.0416667	901.89	48.5005	5.78071e-12	4
M_2_F_lp_Set_9	3.72051	0	0.125	911.552	58.1617	4.61408e-14	4
M_2_F_q_Set_1	2.31337	0	0.333333	927.453	74.0634	1.62577e-17	2
M_2_F_q_Set_10	2.06214	0	0.208333	930.959	77.569	2.81729e-18	3
M_2_F_q_Set_11	2.46697	0	0.291667	918.412	65.0218	1.49424e-15	4
M_2_F_q_Set_2	12.6481	0	0.25	919.709	66.3189	7.81189e-16	2
M_2_F_q_Set_3	2.65011	0	0.291667	926.489	73.0988	2.63346e-17	2
M_2_F_q_Set_4	2.0614	0	0.208333	930.7	77.3097	3.20732e-18	2
M_2_F_q_Set_5	2.02579	0	0.25	934.683	81.2933	4.37633e-19	2
M_2_F_q_Set_6	55.6447	0	0.0416667	936.351	82.9608	1.90113e-19	2
M_2_F_q_Set_7	2.46519	0	0.291667	916.169	62.7788	4.58663e-15	3
M_2_F_q_Set_8	2.3176	0	0.333333	923.74	70.3498	1.04101e-16	3
M_2_F_q_Set_9	3.10711	0	0.25	921.521	68.1306	3.15754e-16	3
M_2_F_qp_Set_1	2.14406	0	0.333333	915.171	61.781	7.55345e-15	3
M_2_F_qp_Set_10	2.04907	0	0.291667	930.782	77.3916	3.07857e-18	5
M_2_F_qp_Set_11	2.08563	0	0.333333	897.146	43.7556	6.19892e-11	9
M_2_F_qp_Set_2	4.10831	0	0.291667	907.48	54.0904	3.53301e-13	3
M_2_F_qp_Set_3	2.38469	0	0.291667	929.152	75.7616	6.95505e-18	3
M_2_F_qp_Set_4	1.99723	0	0.25	934.508	81.1185	4.77617e-19	3
M_2_F_qp_Set_5	1.9965	0	0.25	938.52	85.1305	6.42509e-20	3
M_2_F_qp_Set_6	2.25839	0	0.291667	936.809	83.4187	1.51214e-19	3
M_2_F_qp_Set_7	2.07545	0	0.333333	895.878	42.4884	1.16811e-10	6
M_2_F_qp_Set_8	2.14363	0	0.333333	914.087	60.6971	1.29873e-14	5
M_2_F_qp_Set_9	2.69133	0	0.291667	907.121	53.7307	4.22914e-13	5
M_2_F_lqp_Set_1	2.01561	0	0.208333	876.017	22.6275	2.40013e-06	5
M_2_F_lqp_Set_10	2.02113	0	0.166667	894.991	41.6009	1.82056e-10	5
M_2_F_lqp_Set_11	2.00346	0	0.125	862.613	9.22318	0.00195407	8
M_2_F_lqp_Set_2	2.00699	0	0.25	869.598	16.2079	5.94614e-05	4
M_2_F_lqp_Set_3	2.32766	0	0.291667	905.484	52.0936	9.58853e-13	4
M_2_F_lqp_Set_4	2.05983	0	0.208333	900.22	46.8304	1.33241e-11	3
M_2_F_lqp_Set_5	2.01734	0	0.25	906.04	52.6497	7.26097e-13	5
M_2_F_lqp_Set_6	4.04329	0	0.166667	915.466	62.0765	6.51611e-15	2
M_2_F_lqp_Set_7	2.00282	0	0.125	862.565	9.1746	0.00200211	7
M_2_F_lqp_Set_8	2.01588	0	0.208333	873.498	20.108	8.45917e-06	7
M_2_F_lqp_Set_9	2.00692	0	0.25	869.539	16.1486	6.12507e-05	4
M_2_F_lqpt_Set_1	1.90221	0	0.291667	872.661	19.2709	1.28561e-05	7
M_2_F_lqpt_Set_10	2.04872	0	0.166667	896.105	42.7153	1.04286e-10	8
M_2_F_lqpt_Set_11	1.99316	0	0.291667	865.18	11.7896	0.000541575	10
M_2_F_lqpt_Set_2	2.00643	0	0.25	871.501	18.1112	2.29584e-05	5
M_2_F_lqpt_Set_3	2.30397	0	0.291667	903.663	50.2735	2.38218e-12	4
M_2_F_lqpt_Set_4	2.18369	0	0.166667	896.22	42.8298	9.84841e-11	4
M_2_F_lqpt_Set_5	2.00198	0	0.166667	910.968	57.5781	6.1773e-14	8
M_2_F_lqpt_Set_6	4.11345	0	0.166667	916.363	62.9731	4.16193e-15	4
M_2_F_lqpt_Set_7	1.99519	0	0.291667	862.97	9.57998	0.00163479	9
M_2_F_lqpt_Set_8	1.90033	0	0.291667	872.145	18.7551	1.66385e-05	9
M_2_F_lqpt_Set_9	2.00681	0	0.25	871.438	18.048	2.36952e-05	5
M_2_F_lqpth_Set_1	1.99041	0	0.208333	885.482	32.0925	2.11317e-08	11
M_2_F_lqpth_Set_10	2.04759	0	0.166667	938.372	84.982	6.92029e-20	19
M_2_F_lqpth_Set_11	1.98457	0	0.166667	881.909	28.5192	1.26143e-07	15
M_2_F_lqpth_Set_2	2.01884	0	0.166667	876.722	23.3316	1.68786e-06	8
M_2_F_lqpth_Set_3	2.00361	0	0.25	932.698	79.3076	1.18115e-18	14
M_2_F_lqpth_Set_4	2.06532	0	0.125	900.082	46.6922	1.42771e-11	6
M_2_F_lqpth_Set_5	1.55473	0	0.208333	1003.16	149.772	5.90405e-34	26
M_2_F_lqpth_Set_6	3.62639	0	0.0833333	972.573	119.183	2.5909e-27	19
M_2_F_lqpth_Set_7	1.98575	0	0.166667	868.584	15.1936	9.87378e-05	11
M_2_F_lqpth_Set_8	1.99325	0	0.208333	907.955	54.565	2.78667e-13	18
M_2_F_lqpth_Set_9	2.01956	0	0.166667	879.742	26.3525	3.72697e-07	9
M_2_F_lqph_Set_1	1.99337	0	0.208333	897.368	43.9776	5.54769e-11	14
M_2_F_lqph_Set_10	2.06613	0	0.166667	938.642	85.2517	6.04724e-20	19
M_2_F_lqph_Set_11	1.98135	0	0.166667	878.208	24.818	8.02735e-07	14
M_2_F_lqph_Set_2	2.02022	0	0.166667	873.834	20.4442	7.15037e-06	7
M_2_F_lqph_Set_3	1.98925	0	0.25	951.471	98.0815	9.89904e-23	18
M_2_F_lqph_Set_4	2.06336	0	0.125	902.809	49.4192	3.65168e-12	7
M_2_F_lqph_Set_5	1.54808	0	0.208333	1003.39	150.003	5.25921e-34	26
M_2_F_lqph_Set_6	3.59832	0	0.0833333	998.515	145.125	6.02806e-33	23
M_2_F_lqph_Set_7	1.98511	0	0.166667	868.618	15.2282	9.7044e-05	11
M_2_F_lqph_Set_8	2.00218	0	0.208333	940.487	87.0975	2.403e-20	23
M_2_F_lqph_Set_9	2.01928	0	0.166667	873.794	20.404	7.29548e-06	7
M_3_F_lq_Set_1	2.03889	0	0.25	882.871	29.481	7.79833e-08	4
M_3_F_lq_Set_10	2.02694	0	0.208333	899.104	45.7145	2.3278e-11	4
M_3_F_lq_Set_11	2.00452	0	0.25	865.051	11.6606	0.000577648	6
M_3_F_lq_Set_2	2.01121	0	0.208333	867.52	14.1298	0.000168067	3
M_3_F_lq_Set_3	2.39227	0	0.291667	901.397	48.0067	7.3997e-12	3
M_3_F_lq_Set_4	2.0301	0	0.208333	898.613	45.223	2.97637e-11	3
M_3_F_lq_Set_5	2.02032	0	0.25	911.528	58.1384	4.668e-14	4
M_3_F_lq_Set_6	3.83267	0	0.0833333	914.914	61.5238	8.59037e-15	2
M_3_F_lq_Set_7	2.00427	0	0.166667	863.857	10.4669	0.00104924	5
M_3_F_lq_Set_8	2.03444	0	0.25	887.002	33.6123	9.88353e-09	6
M_3_F_lq_Set_9	2.04504	0	0.291667	868.603	15.2128	9.77927e-05	4
M_3_F_lp_Set_1	2.02884	0	0.125	925.681	72.2911	3.9438e-17	3
M_3_F_lp_Set_10	2.14849	0	0.0833333	909.431	56.0414	1.33196e-13	4
M_3_F_lp_Set_11	2.14102	0	0.0833333	904.7	51.3098	1.41887e-12	6
M_3_F_lp_Set_2	16.1592	0	0.125	912.576	59.1859	2.76484e-14	2
M_3_F_lp_Set_3	3.29543	0	0.166667	933.871	80.4811	6.5688e-19	2
M_3_F_lp_Set_4	2.11182	0	0.0833333	908.242	54.8518	2.41439e-13	2
M_3_F_lp_Set_5	1.76357	0	0.208333	932.587	79.1973	1.24809e-18	3
M_3_F_lp_Set_6	3.63767	0	0.166667	916.912	63.5224	3.1624e-15	2
M_3_F_lp_Set_7	2.10089	0	0.0833333	909.057	55.6673	1.60593e-13	4
M_3_F_lp_Set_8	2.09768	0	0.0416667	905.255	51.8654	1.07472e-12	4
M_3_F_lp_Set_9	3.76679	0	0.125	913.448	60.0579	1.78777e-14	4
M_3_F_q_Set_1	2.16674	0	0.333333	928.025	74.635	1.22164e-17	2
M_3_F_q_Set_10	2.03603	0	0.25	931.617	78.227	2.02748e-18	3
M_3_F_q_Set_11	2.2453	0	0.291667	919.231	65.8408	9.92177e-16	4
M_3_F_q_Set_2	7.74636	0	0.291667	920.295	66.905	5.82755e-16	2
M_3_F_q_Set_3	2.46753	0	0.291667	926.965	73.5755	2.07498e-17	2
M_3_F_q_Set_4	2.03593	0	0.25	931.357	77.9672	2.30865e-18	2
M_3_F_q_Set_5	2.00515	0	0.25	935.308	81.9178	3.20259e-19	2
M_3_F_q_Set_6	99.7987	0	0.0416667	936.632	83.2418	1.65194e-19	2
M_3_F_q_Set_7	2.24968	0	0.291667	916.972	63.5824	3.06888e-15	3
M_3_F_q_Set_8	2.16689	0	0.333333	924.42	71.0297	7.41001e-17	3
M_3_F_q_Set_9	2.747	0	0.291667	922.098	68.7079	2.36592e-16	3
M_3_F_qp_Set_1	2.05716	0	0.291667	919.916	66.5259	7.04377e-16	3
M_3_F_qp_Set_10	2.05259	0	0.333333	936.544	83.1538	1.72627e-19	5
M_3_F_qp_Set_11	2.07462	0	0.25	907.191	53.8015	4.082e-13	9
M_3_F_qp_Set_2	4.18046	0	0.291667	911.333	57.9431	5.14692e-14	3
M_3_F_qp_Set_3	2.25112	0	0.291667	932.26	78.8701	1.46995e-18	3
M_3_F_qp_Set_4	1.98045	0	0.25	937.306	83.9162	1.17911e-19	3
M_3_F_qp_Set_5	1.98002	0	0.25	939.037	85.6469	4.96299e-20	2
M_3_F_qp_Set_6	2.3263	0	0.291667	938.353	84.9627	6.98751e-20	3
M_3_F_qp_Set_7	2.08951	0	0.25	902.936	49.5458	3.42772e-12	6
M_3_F_qp_Set_8	2.05773	0	0.291667	921.005	67.6145	4.08712e-16	5
M_3_F_qp_Set_9	2.4758	0	0.333333	910.627	57.2369	7.3265e-14	4
M_3_F_lqp_Set_1	2.00659	0	0.25	883.547	30.1573	5.56091e-08	5
M_3_F_lqp_Set_10	2.11989	0	0.208333	904.044	50.6545	1.96896e-12	5
M_3_F_lqp_Set_11	2.00403	0	0.25	873.226	19.8361	9.69125e-06	8
M_3_F_lqp_Set_2	2.56458	0	0.291667	874.664	21.2737	4.72283e-06	4
M_3_F_lqp_Set_3	2.15079	0	0.291667	908.04	54.6499	2.6709e-13	3
M_3_F_lqp_Set_4	2.09768	0	0.125	903.739	50.3491	2.29381e-12	3
M_3_F_lqp_Set_5	2.01072	0	0.25	917.06	63.6704	2.93689e-15	5
M_3_F_lqp_Set_6	3.63519	0	0.166667	916.912	63.5224	3.1624e-15	2
M_3_F_lqp_Set_7	2.00318	0	0.25	870.891	17.5013	3.11441e-05	7
M_3_F_lqp_Set_8	2.00619	0	0.25	882.151	28.7613	1.1176e-07	6
M_3_F_lqp_Set_9	2.496	0	0.291667	874.606	21.2156	4.86214e-06	4
M_3_F_lqpt_Set_1	2.00221	0	0.333333	881.678	28.2877	1.41624e-07	7
M_3_F_lqpt_Set_10	2.13784	0	0.208333	903.132	49.7421	3.10715e-12	6
M_3_F_lqpt_Set_11	2.00233	0	0.333333	872.805	19.4148	1.19635e-05	9
M_3_F_lqpt_Set_2	2.62711	0	0.291667	876.804	23.4136	1.62007e-06	5
M_3_F_lqpt_Set_3	2.15574	0	0.291667	908.454	55.0638	2.17155e-13	4
M_3_F_lqpt_Set_4	2.09258	0	0.166667	900.609	47.2187	1.09729e-11	4
M_3_F_lqpt_Set_5	2.00156	0	0.166667	919.371	65.9807	9.25143e-16	7
M_3_F_lqpt_Set_6	3.63519	0	0.166667	916.912	63.5224	3.1624e-15	2
M_3_F_lqpt_Set_7	2.0022	0	0.333333	872.865	19.4749	1.16096e-05	9
M_3_F_lqpt_Set_8	2.00251	0	0.333333	881.878	28.4885	1.28094e-07	8
M_3_F_lqpt_Set_9	2.40942	0	0.291667	876.739	23.3487	1.67346e-06	5
M_3_F_lqpth_Set_1	2.00009	0	0.208333	886.184	32.7936	1.48832e-08	9
M_3_F_lqpth_Set_10	2.03608	0	0.125	924.516	71.1258	7.06258e-17	14
M_3_F_lqpth_Set_11	2.00192	0	0.125	869.405	16.0149	6.54845e-05	9
M_3_F_lqpth_Set_2	2.01859	0	0.166667	877.933	24.5435	9.20815e-07	7
M_3_F_lqpth_Set_3	1.99285	0	0.25	905.619	52.229	8.96069e-13	4
M_3_F_lqpth_Set_4	2.0101	0	0.125	902.757	49.3669	3.74838e-12	6
M_3_F_lqpth_Set_5	1.69154	0	0.125	983.919	130.529	8.90458e-30	23
M_3_F_lqpth_Set_6	2.94029	0	0.0833333	963.884	110.494	1.99599e-25	17
M_3_F_lqpth_Set_7	2.0018	0	0.125	869.441	16.0506	6.4326e-05	9
M_3_F_lqpth_Set_8	2.00021	0	0.208333	900.28	46.8905	1.29295e-11	14
M_3_F_lqpth_Set_9	2.01912	0	0.166667	877.879	24.4889	9.46304e-07	7
M_3_F_lqph_Set_1	2.0001	0	0.208333	886.207	32.8168	1.4711e-08	9
M_3_F_lqph_Set_10	2.03488	0	0.125	990.74	137.351	2.94062e-31	25
M_3_F_lqph_Set_11	2.00194	0	0.125	875.786	22.3957	2.69505e-06	11
M_3_F_lqph_Set_2	2.00317	0	0.166667	875.168	21.7784	3.66957e-06	6
M_3_F_lqph_Set_3	1.99325	0	0.25	910.715	57.3253	7.0098e-14	6
M_3_F_lqph_Set_4	2.01043	0	0.125	902.756	49.3663	3.7495e-12	6
M_3_F_lqph_Set_5	1.69497	0	0.125	1109.37	255.977	5.11816e-57	33
M_3_F_lqph_Set_6	2.9387	0	0.0833333	963.884	110.494	1.99599e-25	17
M_3_F_lqph_Set_7	2.0018	0	0.125	872.557	19.1675	1.35379e-05	10
M_3_F_lqph_Set_8	2.00022	0	0.208333	913.722	60.3325	1.55844e-14	17
M_3_F_lqph_Set_9	2.00315	0	0.166667	875.124	21.7338	3.75236e-06	6
M_4_F_lq_Set_1	2.01696	0	0.25	884.885	31.4955	2.84821e-08	4
M_4_F_lq_Set_10	2.02102	0	0.166667	900.549	47.159	1.13053e-11	4
M_4_F_lq_Set_11	2.00376	0	0.166667	868.161	14.7706	0.00012199	6
M_4_F_lq_Set_2	2.00725	0	0.208333	869.155	15.7647	7.42127e-05	3
M_4_F_lq_Set_3	2.32151	0	0.291667	903.022	49.6321	3.28292e-12	3
M_4_F_lq_Set_4	2.05839	0	0.208333	899.888	46.4982	1.57313e-11	3
M_4_F_lq_Set_5	2.01466	0	0.25	913.21	59.8203	2.01337e-14	4
M_4_F_lq_Set_6	3.67969	0	0.125	915.346	61.9563	6.91972e-15	2
M_4_F_lq_Set_7	2.00336	0	0.166667	865.772	12.3821	0.000402701	5
M_4_F_lq_Set_8	2.01689	0	0.25	889.279	35.8895	3.16539e-09	6
M_4_F_lq_Set_9	2.00751	0	0.208333	869.066	15.6762	7.75673e-05	3
M_4_F_lp_Set_1	2.00678	0	0.166667	926.633	73.2435	2.4497e-17	3
M_4_F_lp_Set_10	2.16791	0	0.125	911.842	58.4521	3.99039e-14	3
M_4_F_lp_Set_11	2.16789	0	0.125	906.446	53.056	5.92594e-13	5
M_4_F_lp_Set_2	33.3527	0	0.125	913.873	60.4831	1.44538e-14	2
M_4_F_lp_Set_3	NA	NA	0.0416667	936.347	82.9571	1.90464e-19	2
M_4_F_lp_Set_4	2.14779	0	0.125	909.913	56.5233	1.04678e-13	2
M_4_F_lp_Set_5	1.5314	0	0.0833333	937.25	83.8599	1.21276e-19	2
M_4_F_lp_Set_6	3.02919	0	0.125	919.07	65.6803	1.07508e-15	2
M_4_F_lp_Set_7	2.14783	0	0.125	910.69	57.3001	7.09858e-14	4
M_4_F_lp_Set_8	2.07742	0	0.0833333	910.129	56.7387	9.39891e-14	4
M_4_F_lp_Set_9	3.02978	0	0.125	916.324	62.9342	4.24367e-15	4
M_4_F_q_Set_1	2.1184	0	0.333333	928.794	75.4039	8.31742e-18	2
M_4_F_q_Set_10	1.99757	0	0.25	932.528	79.138	1.28567e-18	3
M_4_F_q_Set_11	2.11895	0	0.333333	920.363	66.9732	5.63215e-16	4
M_4_F_q_Set_2	4.25193	0	0.291667	921.126	67.7362	3.84592e-16	2
M_4_F_q_Set_3	2.39002	0	0.291667	927.631	74.2409	1.48773e-17	2
M_4_F_q_Set_4	1.99759	0	0.25	932.241	78.8515	1.48371e-18	2
M_4_F_q_Set_5	1.99761	0	0.25	936.16	82.77	2.09146e-19	2
M_4_F_q_Set_6	NA	NA	0	937.043	83.6528	1.34508e-19	2
M_4_F_q_Set_7	2.11953	0	0.333333	918.102	64.7121	1.74451e-15	3
M_4_F_q_Set_8	2.12071	0	0.333333	925.364	71.9742	4.621e-17	3
M_4_F_q_Set_9	2.45326	0	0.291667	922.904	69.5138	1.58123e-16	3
M_4_F_qp_Set_1	2.04358	0	0.291667	924.939	71.5488	5.71616e-17	3
M_4_F_qp_Set_10	2.19385	0	0.291667	940.331	86.9409	2.59867e-20	4
M_4_F_qp_Set_11	2.04494	0	0.291667	913.944	60.5536	1.39537e-14	7
M_4_F_qp_Set_2	2.49913	0	0.291667	916.711	63.3215	3.49654e-15	3
M_4_F_qp_Set_3	2.15671	0	0.291667	933.381	79.9914	8.39123e-19	2
M_4_F_qp_Set_4	1.93796	0	0.25	941.327	87.9366	1.57954e-20	3
M_4_F_qp_Set_5	1.93782	0	0.25	943.854	90.4643	4.46328e-21	1
M_4_F_qp_Set_6	4.42445	0	0.291667	938.837	85.447	5.48478e-20	2
M_4_F_qp_Set_7	2.0446	0	0.291667	911.334	57.9442	5.14403e-14	6
M_4_F_qp_Set_8	2.04412	0	0.291667	925.845	72.4549	3.63365e-17	4
M_4_F_qp_Set_9	2.15369	0	0.291667	917.212	63.8216	2.72302e-15	4
M_4_F_lqp_Set_1	2.01969	0	0.333333	891.866	38.4764	8.68332e-10	5
M_4_F_lqp_Set_10	2.16084	0	0.125	910.176	56.7856	9.18085e-14	4
M_4_F_lqp_Set_11	2.0356	0	0.291667	872.692	19.3019	1.26584e-05	5
M_4_F_lqp_Set_2	2.84324	0	0.291667	880.947	27.5571	2.04071e-07	4
M_4_F_lqp_Set_3	2.14902	0	0.291667	914.06	60.67	1.31648e-14	3
M_4_F_lqp_Set_4	2.14197	0	0.125	908.05	54.6596	2.658e-13	3
M_4_F_lqp_Set_5	1.86843	0	0.208333	923.132	69.7422	1.41061e-16	3
M_4_F_lqp_Set_6	3.02919	0	0.125	919.07	65.6803	1.07508e-15	2
M_4_F_lqp_Set_7	2.03921	0	0.291667	872.758	19.3683	1.22451e-05	5
M_4_F_lqp_Set_8	2.02087	0	0.333333	892.062	38.6724	7.87284e-10	6
M_4_F_lqp_Set_9	2.6396	0	0.291667	880.893	27.5026	2.0971e-07	4
M_4_F_lqpt_Set_1	2.03089	0	0.333333	888.543	35.1526	4.57539e-09	6
M_4_F_lqpt_Set_10	2.10149	0	0.125	908.378	54.988	2.25546e-13	5
M_4_F_lqpt_Set_11	2.01566	0	0.333333	876.541	23.1514	1.84702e-06	7
M_4_F_lqpt_Set_2	2.82311	0	0.291667	883.268	29.8783	6.39355e-08	5
M_4_F_lqpt_Set_3	2.14872	0	0.291667	914.491	61.1007	1.0614e-14	4
M_4_F_lqpt_Set_4	2.09594	0	0.125	905.955	52.5655	7.57297e-13	4
M_4_F_lqpt_Set_5	1.65043	0	0.208333	924.611	71.2211	6.73386e-17	5
M_4_F_lqpt_Set_6	3.02818	0	0.125	919.07	65.6803	1.07508e-15	2
M_4_F_lqpt_Set_7	2.01381	0	0.333333	876.607	23.2169	1.78749e-06	7
M_4_F_lqpt_Set_8	2.02921	0	0.333333	890.188	36.7978	2.00993e-09	7
M_4_F_lqpt_Set_9	2.56731	0	0.291667	883.211	29.8212	6.57859e-08	5
M_4_F_lqpth_Set_1	2.00176	0	0.208333	886.271	32.8811	1.42456e-08	7
M_4_F_lqpth_Set_10	2.02535	0	0.0833333	927.027	73.6373	2.01186e-17	13
M_4_F_lqpth_Set_11	2.00103	0	0.125	873.041	19.6514	1.06286e-05	8
M_4_F_lqpth_Set_2	2.01421	0	0.208333	879.92	26.5302	3.4101e-07	6
M_4_F_lqpth_Set_3	1.99102	0	0.25	913.025	59.6348	2.20897e-14	5
M_4_F_lqpth_Set_4	1.89946	0	0.0833333	908.407	55.0174	2.22251e-13	7
M_4_F_lqpth_Set_5	1.58316	0	0.0833333	967.392	114.002	3.45586e-26	19
M_4_F_lqpth_Set_6	2.37181	0	0.125	938.476	85.0856	6.57084e-20	10
M_4_F_lqpth_Set_7	2.0009	0	0.125	873.09	19.7	1.03737e-05	8
M_4_F_lqpth_Set_8	2.00189	0	0.208333	900.35	46.9605	1.24852e-11	12
M_4_F_lqpth_Set_9	2.01294	0	0.208333	879.877	26.4867	3.48514e-07	6
M_4_F_lqph_Set_1	2.00178	0	0.208333	889.165	35.7755	3.35101e-09	8
M_4_F_lqph_Set_10	2.02791	0	0.0833333	927.027	73.6373	2.01186e-17	13
M_4_F_lqph_Set_11	2.00103	0	0.125	873.037	19.6466	1.06542e-05	8
M_4_F_lqph_Set_2	2.01105	0	0.208333	879.89	26.5005	3.46114e-07	6
M_4_F_lqph_Set_3	1.9907	0	0.25	910.54	57.1505	7.64984e-14	4
M_4_F_lqph_Set_4	1.90009	0	0.0833333	908.407	55.0174	2.22251e-13	7
M_4_F_lqph_Set_5	1.5591	0	0.0833333	967.392	114.002	3.45586e-26	19
M_4_F_lqph_Set_6	2.37181	0	0.125	938.476	85.0856	6.57084e-20	10
M_4_F_lqph_Set_7	2.0009	0	0.125	873.085	19.6949	1.04001e-05	8
M_4_F_lqph_Set_8	2.00191	0	0.208333	907.956	54.5662	2.78499e-13	14
M_4_F_lqph_Set_9	2.01488	0	0.208333	879.847	26.4571	3.53713e-07	6
M_5_F_lq_Set_1	2.00753	0	0.25	887.271	33.8809	8.64129e-09	4
M_5_F_lq_Set_10	2.06882	0	0.208333	902.275	48.8853	4.76893e-12	4
M_5_F_lq_Set_11	2.00325	0	0.208333	865.393	12.0035	0.000486627	4
M_5_F_lq_Set_2	2.01729	0	0.25	871.08	17.6901	2.83383e-05	3
M_5_F_lq_Set_3	2.19482	0	0.291667	904.956	51.5665	1.24799e-12	3
M_5_F_lq_Set_4	2.09735	0	0.208333	901.393	48.0029	7.41347e-12	3
M_5_F_lq_Set_5	2.01277	0	0.25	915.27	61.88	7.18884e-15	4
M_5_F_lq_Set_6	3.64111	0	0.125	915.914	62.5242	5.20931e-15	2
M_5_F_lq_Set_7	2.00272	0	0.208333	865.499	12.1089	0.000461653	4
M_5_F_lq_Set_8	2.00758	0	0.25	889.425	36.0348	2.94355e-09	5
M_5_F_lq_Set_9	2.01595	0	0.25	870.998	17.6079	2.95277e-05	3
M_5_F_lp_Set_1	1.96394	0	0.125	927.917	74.5267	1.28964e-17	3
M_5_F_lp_Set_10	2.32408	0	0.125	912.069	58.6789	3.56268e-14	2
M_5_F_lp_Set_11	2.32443	0	0.125	912.203	58.8128	3.33184e-14	5
M_5_F_lp_Set_2	49.1608	0	0.125	915.59	62.2004	6.1247e-15	2
M_5_F_lp_Set_3	NA	NA	0	939.5	86.1104	3.93631e-20	2
M_5_F_lp_Set_4	2.32391	0	0.125	912.108	58.7179	3.49376e-14	2
M_5_F_lp_Set_5	NA	NA	0	940.189	86.7988	2.79003e-20	2
M_5_F_lp_Set_6	3.06687	0	0.125	918.775	65.3849	1.24619e-15	1
M_5_F_lp_Set_7	2.32426	0	0.125	912.861	59.4715	2.39693e-14	4
M_5_F_lp_Set_8	1.96394	0	0.125	916.695	63.3051	3.52527e-15	4
M_5_F_lp_Set_9	3.15315	0	0.125	917.626	64.2363	2.21303e-15	3
M_5_F_q_Set_1	2.07892	0	0.333333	929.746	76.3559	5.16725e-18	2
M_5_F_q_Set_10	1.98894	0	0.25	933.709	80.3188	7.12393e-19	3
M_5_F_q_Set_11	2.08014	0	0.333333	921.82	68.4301	2.71845e-16	4
M_5_F_q_Set_2	3.47078	0	0.291667	922.216	68.8261	2.23011e-16	2
M_5_F_q_Set_3	2.31481	0	0.291667	928.496	75.1059	9.65379e-18	2
M_5_F_q_Set_4	1.98907	0	0.25	933.351	79.9614	8.51768e-19	2
M_5_F_q_Set_5	1.98874	0	0.25	937.234	83.8444	1.22223e-19	2
M_5_F_q_Set_6	NA	NA	0	937.613	84.2234	1.01121e-19	2
M_5_F_q_Set_7	2.07984	0	0.333333	919.57	66.1804	8.37205e-16	3
M_5_F_q_Set_8	2.07938	0	0.333333	926.583	73.1929	2.51241e-17	3
M_5_F_q_Set_9	2.32252	0	0.291667	923.96	70.5703	9.32362e-17	3
M_5_F_qp_Set_1	1.98179	0	0.291667	927.628	74.2384	1.48962e-17	2
M_5_F_qp_Set_10	NA	NA	0	941.816	88.4257	1.23688e-20	2
M_5_F_qp_Set_11	1.98384	0	0.291667	915.315	61.9249	7.02938e-15	4
M_5_F_qp_Set_2	2.31588	0	0.291667	924.204	70.8143	8.25295e-17	3
M_5_F_qp_Set_3	2.07706	0	0.291667	938.535	85.1447	6.37964e-20	2
M_5_F_qp_Set_4	NA	NA	0	947.165	93.7746	8.52757e-22	3
M_5_F_qp_Set_5	NA	NA	0	946.913	93.5235	9.66839e-22	1
M_5_F_qp_Set_6	NA	NA	0	944.002	90.6124	4.14465e-21	2
M_5_F_qp_Set_7	1.98364	0	0.291667	915.324	61.9342	6.99652e-15	4
M_5_F_qp_Set_8	1.98207	0	0.291667	927.621	74.2306	1.49543e-17	2
M_5_F_qp_Set_9	2.07729	0	0.291667	924.196	70.8065	8.28502e-17	3
M_5_F_lqp_Set_1	2.04042	0	0.291667	900.996	47.6065	9.03881e-12	5
M_5_F_lqp_Set_10	2.29262	0	0.125	913.02	59.6302	2.2141e-14	3
M_5_F_lqp_Set_11	2.06137	0	0.291667	880.45	27.0601	2.61633e-07	5
M_5_F_lqp_Set_2	4.63028	0	0.291667	888.368	34.9784	4.99197e-09	4
M_5_F_lqp_Set_3	2.08888	0	0.291667	917.414	64.0239	2.46106e-15	2
M_5_F_lqp_Set_4	2.29245	0	0.125	913.059	59.6687	2.17183e-14	3
M_5_F_lqp_Set_5	NA	NA	0	930.962	77.5724	2.81249e-18	3
M_5_F_lqp_Set_6	3.06687	0	0.125	918.775	65.3849	1.24619e-15	1
M_5_F_lqp_Set_7	2.06226	0	0.291667	880.504	27.1145	2.54623e-07	5
M_5_F_lqp_Set_8	2.0398	0	0.291667	903.584	50.1945	2.47821e-12	6
M_5_F_lqp_Set_9	2.32964	0	0.291667	888.319	34.9291	5.11643e-09	4
M_5_F_lqpt_Set_1	2.00699	0	0.291667	898.746	45.3565	2.78416e-11	6
M_5_F_lqpt_Set_10	2.14972	0	0.125	912.181	58.7914	3.36781e-14	4
M_5_F_lqpt_Set_11	2.05604	0	0.291667	882.627	29.237	8.81032e-08	6
M_5_F_lqpt_Set_2	4.55954	0	0.291667	888.268	34.8782	5.24847e-09	4
M_5_F_lqpt_Set_3	2.08254	0	0.291667	914.826	61.4365	8.97334e-15	2
M_5_F_lqpt_Set_4	2.14871	0	0.125	912.218	58.8278	3.30693e-14	4
M_5_F_lqpt_Set_5	1.26923	0	0.0416667	933.013	79.6231	1.00878e-18	5
M_5_F_lqpt_Set_6	3.06687	0	0.125	918.775	65.3849	1.24619e-15	1
M_5_F_lqpt_Set_7	2.05385	0	0.291667	882.683	29.2928	8.56788e-08	6
M_5_F_lqpt_Set_8	2.00683	0	0.291667	898.733	45.3435	2.80233e-11	6
M_5_F_lqpt_Set_9	2.32548	0	0.291667	888.221	34.8309	5.37401e-09	4
M_5_F_lqpth_Set_1	1.9877	0	0.208333	888.943	35.5527	3.74587e-09	6
M_5_F_lqpth_Set_10	1.8962	0	0.0833333	905.397	52.0073	1.0011e-12	5
M_5_F_lqpth_Set_11	2.00088	0	0.125	879.416	26.0258	4.3884e-07	8
M_5_F_lqpth_Set_2	2.00985	0	0.208333	882.238	28.8481	1.07016e-07	5
M_5_F_lqpth_Set_3	1.99489	0	0.25	913.835	60.4453	1.473e-14	4
M_5_F_lqpth_Set_4	1.89591	0	0.0833333	905.431	52.0413	9.84263e-13	5
M_5_F_lqpth_Set_5	1.32704	0	0.0833333	967.137	113.747	3.92463e-26	18
M_5_F_lqpth_Set_6	1.96855	0	0.125	929.989	76.5989	4.57593e-18	6
M_5_F_lqpth_Set_7	2.00075	0	0.125	879.457	26.0671	4.29864e-07	8
M_5_F_lqpth_Set_8	1.98785	0	0.208333	886.327	32.9366	1.38558e-08	5
M_5_F_lqpth_Set_9	2.00906	0	0.208333	882.201	28.811	1.09016e-07	5
M_5_F_lqph_Set_1	1.98772	0	0.208333	891.666	38.2765	9.59589e-10	7
M_5_F_lqph_Set_10	1.89632	0	0.0833333	905.397	52.0073	1.0011e-12	5
M_5_F_lqph_Set_11	2.00091	0	0.125	879.421	26.0307	4.37756e-07	8
M_5_F_lqph_Set_2	2.00925	0	0.208333	884.794	31.4036	2.98217e-08	6
M_5_F_lqph_Set_3	1.99414	0	0.25	921.633	68.2432	2.98467e-16	7
M_5_F_lqph_Set_4	1.89547	0	0.0833333	905.431	52.0413	9.84263e-13	5
M_5_F_lqph_Set_5	1.32722	0	0.0833333	967.137	113.747	3.92463e-26	18
M_5_F_lqph_Set_6	1.96858	0	0.125	929.989	76.5989	4.57593e-18	6
M_5_F_lqph_Set_7	2.00076	0	0.125	879.462	26.0721	4.28782e-07	8
M_5_F_lqph_Set_8	1.98784	0	0.208333	891.653	38.2629	9.66139e-10	7
M_5_F_lqph_Set_9	2.00999	0	0.208333	884.756	31.3665	3.03802e-08	6
M_6_F_lq_Set_1	2.03471	0	0.25	889.987	36.5967	2.22254e-09	4
M_6_F_lq_Set_10	2.11419	0	0.208333	904.259	50.8691	1.76867e-12	4
M_6_F_lq_Set_11	2.00382	0	0.25	867.631	14.2407	0.000159	4
M_6_F_lq_Set_2	2.49508	0	0.291667	873.261	19.8708	9.52427e-06	3
M_6_F_lq_Set_3	2.12893	0	0.291667	907.187	53.7973	4.09071e-13	3
M_6_F_lq_Set_4	2.10692	0	0.125	903.098	49.7082	3.16037e-12	3
M_6_F_lq_Set_5	2.01028	0	0.25	917.714	64.3237	2.11846e-15	4
M_6_F_lq_Set_6	3.14911	0	0.125	916.627	63.2367	3.64804e-15	2
M_6_F_lq_Set_7	2.00377	0	0.25	867.727	14.3371	0.000151521	4
M_6_F_lq_Set_8	2.03363	0	0.25	889.97	36.5803	2.24088e-09	4
M_6_F_lq_Set_9	2.01925	0	0.291667	873.185	19.7948	9.89315e-06	3
M_6_F_lp_Set_1	NA	NA	0	929.584	76.1941	5.60255e-18	3
M_6_F_lp_Set_10	NA	NA	0	914.819	61.4291	9.00671e-15	2
M_6_F_lp_Set_11	NA	NA	0	915.603	62.2134	6.08486e-15	4
M_6_F_lp_Set_2	NA	NA	0	917.761	64.3706	2.06936e-15	2
M_6_F_lp_Set_3	NA	NA	0	938.828	85.4377	5.51019e-20	1
M_6_F_lp_Set_4	NA	NA	0	914.851	61.4614	8.86263e-15	2
M_6_F_lp_Set_5	NA	NA	0	939.012	85.6219	5.02547e-20	1
M_6_F_lp_Set_6	NA	NA	0	920.768	67.3776	4.60119e-16	1
M_6_F_lp_Set_7	NA	NA	0	915.628	62.2385	6.00904e-15	4
M_6_F_lp_Set_8	NA	NA	0	925.199	71.8091	5.0186e-17	4
M_6_F_lp_Set_9	NA	NA	0	917.738	64.3477	2.09312e-15	2
M_6_F_q_Set_1	2.05478	0	0.333333	930.869	77.479	2.947e-18	2
M_6_F_q_Set_10	1.98025	0	0.25	935.188	81.7984	3.39961e-19	3
M_6_F_q_Set_11	2.05579	0	0.333333	923.627	70.2371	1.1014e-16	4
M_6_F_q_Set_2	2.95736	0	0.291667	923.586	70.196	1.12426e-16	2
M_6_F_q_Set_3	2.24404	0	0.291667	929.578	76.1877	5.62058e-18	2
M_6_F_q_Set_4	1.98008	0	0.25	934.698	81.3078	4.34483e-19	2
M_6_F_q_Set_5	1.98012	0	0.25	938.53	85.1399	6.39504e-20	2
M_6_F_q_Set_6	NA	NA	0	938.384	84.9937	6.87992e-20	2
M_6_F_q_Set_7	2.05596	0	0.333333	921.399	68.0088	3.3559e-16	3
M_6_F_q_Set_8	2.05482	0	0.333333	928.093	74.7026	1.18102e-17	3
M_6_F_q_Set_9	2.24072	0	0.291667	925.302	71.9124	4.76591e-17	3
M_6_F_qp_Set_1	1.96967	0	0.291667	931.559	78.1691	2.08704e-18	2
M_6_F_qp_Set_10	NA	NA	0	945.525	92.1346	1.93621e-21	1
M_6_F_qp_Set_11	1.97055	0	0.291667	924.349	70.9595	7.67497e-17	4
M_6_F_qp_Set_2	2.2008	0	0.291667	928.895	75.5046	7.9087e-18	2
M_6_F_qp_Set_3	2.0422	0	0.291667	939.126	85.7358	4.74713e-20	1
M_6_F_qp_Set_4	NA	NA	0	945.532	92.142	1.92908e-21	1
M_6_F_qp_Set_5	NA	NA	0	944.979	91.589	2.54353e-21	0
M_6_F_qp_Set_6	NA	NA	0	944.979	91.589	2.54353e-21	0
M_6_F_qp_Set_7	1.97034	0	0.291667	924.357	70.9674	7.64449e-17	4
M_6_F_qp_Set_8	1.97044	0	0.291667	931.552	78.1617	2.09478e-18	2
M_6_F_qp_Set_9	2.04064	0	0.291667	928.887	75.4972	7.93821e-18	2
M_6_F_lqp_Set_1	1.97011	0	0.291667	910.988	57.5977	6.11707e-14	5
M_6_F_lqp_Set_10	NA	NA	0	914.819	61.4291	9.00671e-15	2
M_6_F_lqp_Set_11	1.97061	0	0.291667	889.007	35.6171	3.62728e-09	5
M_6_F_lqp_Set_2	2.19631	0	0.291667	893.36	39.9696	4.11568e-10	3
M_6_F_lqp_Set_3	2.04198	0	0.291667	922.539	69.1486	1.89806e-16	2
M_6_F_lqp_Set_4	NA	NA	0	914.851	61.4614	8.86263e-15	2
M_6_F_lqp_Set_5	NA	NA	0	935.204	81.8145	3.37231e-19	2
M_6_F_lqp_Set_6	NA	NA	0	920.768	67.3776	4.60119e-16	1
M_6_F_lqp_Set_7	1.97016	0	0.291667	889.051	35.6606	3.54916e-09	5
M_6_F_lqp_Set_8	1.97011	0	0.291667	910.977	57.5874	6.14856e-14	5
M_6_F_lqp_Set_9	2.04261	0	0.291667	893.32	39.9304	4.19708e-10	3
M_6_F_lqpt_Set_1	1.96986	0	0.291667	905.676	52.286	8.70891e-13	5
M_6_F_lqpt_Set_10	NA	NA	0	915.992	62.6019	5.01063e-15	3
M_6_F_lqpt_Set_11	1.97075	0	0.291667	891.156	37.766	1.23866e-09	6
M_6_F_lqpt_Set_2	2.20357	0	0.291667	895.609	42.2193	1.33636e-10	4
M_6_F_lqpt_Set_3	2.0409	0	0.291667	919.322	65.9316	9.48111e-16	2
M_6_F_lqpt_Set_4	NA	NA	0	916.024	62.6336	4.93196e-15	3
M_6_F_lqpt_Set_5	NA	NA	0	935.319	81.9292	3.18444e-19	3
M_6_F_lqpt_Set_6	NA	NA	0	920.768	67.3776	4.60119e-16	1
M_6_F_lqpt_Set_7	1.97008	0	0.291667	891.201	37.8105	1.21136e-09	6
M_6_F_lqpt_Set_8	1.96946	0	0.291667	905.664	52.2742	8.76073e-13	5
M_6_F_lqpt_Set_9	2.04062	0	0.291667	895.568	42.1782	1.36411e-10	4
M_6_F_lqpth_Set_1	1.98703	0	0.208333	894.389	40.9987	2.46026e-10	6
M_6_F_lqpth_Set_10	2.00842	0	0.0833333	908.134	54.7438	2.54842e-13	5
M_6_F_lqpth_Set_11	2.00039	0	0.125	883.291	29.9012	6.32084e-08	7
M_6_F_lqpth_Set_2	2.00722	0	0.25	893.17	39.7803	4.52428e-10	7
M_6_F_lqpth_Set_3	2.0644	0	0.291667	917.415	64.0253	2.45926e-15	4
M_6_F_lqpth_Set_4	2.00808	0	0.0833333	908.163	54.7731	2.51136e-13	5
M_6_F_lqpth_Set_5	1.32659	0	0.0833333	921.094	67.704	3.90842e-16	3
M_6_F_lqpth_Set_6	1.96318	0	0.125	920.768	67.3776	4.60119e-16	1
M_6_F_lqpth_Set_7	2.00025	0	0.125	883.323	29.9329	6.2214e-08	7
M_6_F_lqpth_Set_8	1.98716	0	0.208333	894.376	40.9858	2.47608e-10	6
M_6_F_lqpth_Set_9	2.00739	0	0.25	893.14	39.7497	4.59395e-10	7
M_6_F_lqph_Set_1	1.98706	0	0.208333	894.361	40.9706	2.49507e-10	6
M_6_F_lqph_Set_10	2.00833	0	0.0833333	908.134	54.7438	2.54842e-13	5
M_6_F_lqph_Set_11	2.00039	0	0.125	883.252	29.8618	6.44652e-08	7
M_6_F_lqph_Set_2	2.00705	0	0.25	890.572	37.182	1.65865e-09	6
M_6_F_lqph_Set_3	2.0681	0	0.291667	917.396	64.0059	2.48327e-15	4
M_6_F_lqph_Set_4	2.00766	0	0.0833333	908.163	54.7731	2.51136e-13	5
M_6_F_lqph_Set_5	1.32725	0	0.0833333	921.094	67.704	3.90842e-16	3
M_6_F_lqph_Set_6	1.96318	0	0.125	920.768	67.3776	4.60119e-16	1
M_6_F_lqph_Set_7	2.00026	0	0.125	883.286	29.8963	6.33613e-08	7
M_6_F_lqph_Set_8	1.98717	0	0.208333	894.348	40.9578	2.51108e-10	6
M_6_F_lqph_Set_9	2.0069	0	0.25	890.542	37.1516	1.68406e-09	6

## Sheet: 50km-PC_4
Model	Mean_AUC_ratio	pval_pROC	Omission_rate_at_5%	AICc	delta_AICc	W_AICc	N_parameters
M_0.1_F_lq_Set_1	1.69747	0	0.208333	879.831	26.4415	3.56469e-07	4
M_0.1_F_lq_Set_10	2.23991	0	0.166667	900.988	47.5979	9.07784e-12	6
M_0.1_F_lq_Set_11	2.28793	0	0.166667	864.963	11.5732	0.000603448	8
M_0.1_F_lq_Set_2	2.22515	0	0.125	865.878	12.4885	0.000381849	4
M_0.1_F_lq_Set_3	2.02605	0	0.166667	901.294	47.9039	7.78999e-12	4
M_0.1_F_lq_Set_4	2.2408	0	0.166667	898.784	45.3939	2.73261e-11	4
M_0.1_F_lq_Set_5	1.65074	0	0.0833333	909.09	55.6998	1.58001e-13	4
M_0.1_F_lq_Set_6	2.95853	0	0.0833333	918.477	65.0875	1.44594e-15	4
M_0.1_F_lq_Set_7	2.25935	0	0.166667	862.391	9.00077	0.00218392	6
M_0.1_F_lq_Set_8	2.00092	0	0.208333	883.627	30.2375	5.34254e-08	6
M_0.1_F_lq_Set_9	2.22719	0	0.125	868.326	14.9365	0.000112284	6
M_0.1_F_lp_Set_1	1.95199	0	0.0833333	924.445	71.0554	7.31564e-17	3
M_0.1_F_lp_Set_10	2.83097	0	0.166667	906.794	53.4043	4.97894e-13	6
M_0.1_F_lp_Set_11	3.23975	0	0.25	899.818	46.4276	1.62969e-11	10
M_0.1_F_lp_Set_2	3.89118	0	0.166667	911.322	57.9317	5.17634e-14	3
M_0.1_F_lp_Set_3	1.9987	0	0.166667	927.456	74.0659	1.62377e-17	3
M_0.1_F_lp_Set_4	2.74247	0	0.208333	908.169	54.7786	2.50447e-13	3
M_0.1_F_lp_Set_5	1.79617	0	0.125	923.459	70.0694	1.19772e-16	3
M_0.1_F_lp_Set_6	3.69995	0	0.125	916.573	63.1834	3.74643e-15	3
M_0.1_F_lp_Set_7	3.08889	0	0.208333	906.23	52.8401	6.60158e-13	6
M_0.1_F_lp_Set_8	2.08517	0	0.0833333	901.37	47.9798	7.49985e-12	6
M_0.1_F_lp_Set_9	3.62595	0	0.166667	914.988	61.5984	8.2756e-15	6
M_0.1_F_q_Set_1	2.04925	0	0.125	926.973	73.5831	2.06715e-17	2
M_0.1_F_q_Set_10	2.01212	0	0	930.392	77.002	3.74068e-18	3
M_0.1_F_q_Set_11	2.14668	0	0.0833333	917.727	64.3374	2.104e-15	4
M_0.1_F_q_Set_2	42.5281	0	0.0833333	919.245	65.8548	9.85214e-16	2
M_0.1_F_q_Set_3	2.29009	0	0.0833333	926.082	72.6919	3.22767e-17	2
M_0.1_F_q_Set_4	2.03161	0	0.0416667	930.121	76.7309	4.28372e-18	2
M_0.1_F_q_Set_5	2.00857	0	0.25	934.155	80.7649	5.69966e-19	2
M_0.1_F_q_Set_6	24.7078	0	0.208333	936.099	82.7091	2.15619e-19	2
M_0.1_F_q_Set_7	2.13831	0	0.0833333	915.526	62.1361	6.32481e-15	3
M_0.1_F_q_Set_8	2.05635	0	0.125	923.171	69.7806	1.3838e-16	3
M_0.1_F_q_Set_9	2.51379	0	0.0833333	921.019	67.6294	4.05686e-16	3
M_0.1_F_qp_Set_1	2.21946	0	0.125	908.116	54.7263	2.57083e-13	3
M_0.1_F_qp_Set_10	2.07646	0	0.0833333	925.842	72.4523	3.6384e-17	6
M_0.1_F_qp_Set_11	2.88704	0	0.0833333	883.619	30.2289	5.36533e-08	9
M_0.1_F_qp_Set_2	2.0024	0	0.0416667	904.107	50.717	1.90837e-12	3
M_0.1_F_qp_Set_3	2.50406	0	0.208333	926.604	73.2141	2.48596e-17	3
M_0.1_F_qp_Set_4	2.03913	0	0.0416667	932.075	78.685	1.61248e-18	3
M_0.1_F_qp_Set_5	1.99844	0	0.291667	935.475	82.0846	2.94629e-19	3
M_0.1_F_qp_Set_6	2.45044	0	0.166667	935.726	82.3365	2.59765e-19	3
M_0.1_F_qp_Set_7	1.99754	0	0.0416667	886.474	33.0841	1.28707e-08	6
M_0.1_F_qp_Set_8	2.35219	0	0.166667	907.721	54.331	3.13259e-13	6
M_0.1_F_qp_Set_9	2.39694	0	0.0833333	899.613	46.2227	1.80551e-11	5
M_0.1_F_lqp_Set_1	1.96607	0	0.166667	865.308	11.9177	0.000507975	5
M_0.1_F_lqp_Set_10	2.97942	0	0.208333	887.836	34.4465	6.5127e-09	9
M_0.1_F_lqp_Set_11	2.20023	0	0.166667	859.675	6.28494	0.00849125	13
M_0.1_F_lqp_Set_2	2.04631	0	0.125	864.78	11.3904	0.000661202	5
M_0.1_F_lqp_Set_3	2.15008	0	0.166667	895.898	42.5076	1.15699e-10	4
M_0.1_F_lqp_Set_4	2.96894	0	0.208333	901.259	47.8693	7.92574e-12	5
M_0.1_F_lqp_Set_5	1.68882	0	0.0833333	892.792	39.402	5.46619e-10	5
M_0.1_F_lqp_Set_6	2.83035	0	0.166667	920.899	67.5091	4.30834e-16	5
M_0.1_F_lqp_Set_7	3.56829	0	0.166667	854.871	1.48119	0.093776	9
M_0.1_F_lqp_Set_8	1.9874	0	0.0833333	861.161	7.77117	0.00403869	9
M_0.1_F_lqp_Set_9	1.82995	0	0.166667	869.879	16.4895	5.1652e-05	8
M_0.1_F_lqpt_Set_1	2.22786	0	0.958333	NA	NA	NA	69
M_0.1_F_lqpt_Set_10	2.97859	0	1	NA	NA	NA	82
M_0.1_F_lqpt_Set_11	2.76528	0	1	NA	NA	NA	105
M_0.1_F_lqpt_Set_2	3.38679	0	0.541667	NA	NA	NA	71
M_0.1_F_lqpt_Set_3	2.31275	0	0.958333	NA	NA	NA	72
M_0.1_F_lqpt_Set_4	2.86241	0	0.458333	NA	NA	NA	64
M_0.1_F_lqpt_Set_5	3.04144	0	0.875	NA	NA	NA	72
M_0.1_F_lqpt_Set_6	4.71835	0	0.875	NA	NA	NA	62
M_0.1_F_lqpt_Set_7	3.52477	0	0.916667	NA	NA	NA	93
M_0.1_F_lqpt_Set_8	2.72113	0	1	NA	NA	NA	93
M_0.1_F_lqpt_Set_9	2.92731	0	1	NA	NA	NA	90
M_0.1_F_lqpth_Set_1	1.55967	0	0.916667	NA	NA	NA	77
M_0.1_F_lqpth_Set_10	2.80354	0	1	NA	NA	NA	91
M_0.1_F_lqpth_Set_11	3.00833	0	1	NA	NA	NA	114
M_0.1_F_lqpth_Set_2	1.60449	0	0.833333	NA	NA	NA	78
M_0.1_F_lqpth_Set_3	1.51695	0	0.875	NA	NA	NA	78
M_0.1_F_lqpth_Set_4	2.05165	0	0.833333	NA	NA	NA	73
M_0.1_F_lqpth_Set_5	1.75831	0	1	NA	NA	NA	72
M_0.1_F_lqpth_Set_6	2.04357	0	0.958333	NA	NA	NA	71
M_0.1_F_lqpth_Set_7	2.35766	0	0.958333	NA	NA	NA	110
M_0.1_F_lqpth_Set_8	1.5223	0	1	NA	NA	NA	104
M_0.1_F_lqpth_Set_9	1.93656	0	1	NA	NA	NA	96
M_0.1_F_lqph_Set_1	1.92346	0	0.416667	NA	NA	NA	90
M_0.1_F_lqph_Set_10	2.01305	0	0.416667	NA	NA	NA	117
M_0.1_F_lqph_Set_11	2.95744	0	0.5	NA	NA	NA	151
M_0.1_F_lqph_Set_2	2.42726	0	0.166667	NA	NA	NA	95
M_0.1_F_lqph_Set_3	1.95077	0	0.291667	NA	NA	NA	116
M_0.1_F_lqph_Set_4	2.13143	0	0.25	NA	NA	NA	119
M_0.1_F_lqph_Set_5	1.96868	0	0.375	NA	NA	NA	142
M_0.1_F_lqph_Set_6	8.66789	0	0.375	NA	NA	NA	136
M_0.1_F_lqph_Set_7	2.67963	0	0.416667	NA	NA	NA	116
M_0.1_F_lqph_Set_8	2.43663	0	0.583333	NA	NA	NA	116
M_0.1_F_lqph_Set_9	2.2246	0	0.375	NA	NA	NA	142
M_0.25_F_lq_Set_1	1.97617	0	0.208333	879.854	26.464	3.52489e-07	4
M_0.25_F_lq_Set_10	2.19424	0	0.166667	901.025	47.6346	8.91264e-12	6
M_0.25_F_lq_Set_11	2.14761	0	0.166667	865.009	11.6188	0.000589857	8
M_0.25_F_lq_Set_2	2.18357	0	0.125	865.922	12.5321	0.000373613	4
M_0.25_F_lq_Set_3	2.02015	0	0.166667	898.939	45.5487	2.52909e-11	3
M_0.25_F_lq_Set_4	2.20073	0	0.166667	898.809	45.4189	2.69867e-11	4
M_0.25_F_lq_Set_5	1.62312	0	0.0833333	909.108	55.7181	1.56565e-13	4
M_0.25_F_lq_Set_6	3.00244	0	0.0833333	918.495	65.1051	1.43332e-15	4
M_0.25_F_lq_Set_7	2.17104	0	0.166667	862.436	9.04654	0.00213451	6
M_0.25_F_lq_Set_8	1.98075	0	0.208333	883.653	30.263	5.27481e-08	6
M_0.25_F_lq_Set_9	2.20616	0	0.125	868.367	14.9772	0.000110022	6
M_0.25_F_lp_Set_1	1.94996	0	0.0833333	924.46	71.0703	7.26127e-17	3
M_0.25_F_lp_Set_10	2.71822	0	0.166667	904.29	50.9002	1.74141e-12	5
M_0.25_F_lp_Set_11	3.0554	0	0.208333	900.291	46.9006	1.28647e-11	10
M_0.25_F_lp_Set_2	3.80595	0	0.166667	911.379	57.9888	5.03055e-14	3
M_0.25_F_lp_Set_3	1.99909	0	0.166667	927.52	74.1299	1.57259e-17	3
M_0.25_F_lp_Set_4	2.59118	0	0.208333	908.224	54.8338	2.4363e-13	3
M_0.25_F_lp_Set_5	1.73802	0	0.125	923.52	70.1296	1.16218e-16	3
M_0.25_F_lp_Set_6	3.53553	0	0.125	914.373	60.9828	1.12585e-14	2
M_0.25_F_lp_Set_7	3.01682	0	0.208333	906.321	52.9311	6.30795e-13	6
M_0.25_F_lp_Set_8	2.00365	0	0.0833333	901.495	48.1049	7.04516e-12	6
M_0.25_F_lp_Set_9	3.44871	0	0.166667	915.051	61.6611	8.0205e-15	6
M_0.25_F_q_Set_1	2.04971	0	0.125	926.98	73.5897	2.06031e-17	2
M_0.25_F_q_Set_10	2.0158	0	0	930.404	77.0136	3.71916e-18	3
M_0.25_F_q_Set_11	2.11675	0	0.0833333	917.738	64.3485	2.09236e-15	4
M_0.25_F_q_Set_2	39.8929	0	0.0833333	919.251	65.8609	9.82222e-16	2
M_0.25_F_q_Set_3	2.29676	0	0.0833333	926.091	72.7006	3.2136e-17	2
M_0.25_F_q_Set_4	2.03738	0	0.0416667	930.132	76.7421	4.25981e-18	2
M_0.25_F_q_Set_5	2.00846	0	0.25	934.164	80.774	5.67371e-19	2
M_0.25_F_q_Set_6	25.0326	0	0.208333	936.107	82.7175	2.14712e-19	2
M_0.25_F_q_Set_7	2.12092	0	0.0833333	915.534	62.1444	6.29849e-15	3
M_0.25_F_q_Set_8	2.05522	0	0.125	923.181	69.7906	1.3769e-16	3
M_0.25_F_q_Set_9	2.47209	0	0.0833333	921.031	67.6408	4.03384e-16	3
M_0.25_F_qp_Set_1	2.27203	0	0.125	908.363	54.9732	2.27226e-13	3
M_0.25_F_qp_Set_10	2.05162	0	0.0833333	926.2	72.8105	3.04182e-17	6
M_0.25_F_qp_Set_11	2.60757	0	0.0833333	881.462	28.0718	1.57767e-07	8
M_0.25_F_qp_Set_2	2.00172	0	0.0416667	904.161	50.7711	1.85751e-12	3
M_0.25_F_qp_Set_3	2.40926	0	0.166667	926.643	73.2526	2.43848e-17	3
M_0.25_F_qp_Set_4	2.03271	0	0.0416667	932.118	78.7282	1.57804e-18	3
M_0.25_F_qp_Set_5	1.99698	0	0.25	935.522	82.1325	2.87663e-19	3
M_0.25_F_qp_Set_6	6.13587	0	0.208333	935.753	82.363	2.56349e-19	3
M_0.25_F_qp_Set_7	1.99757	0	0.0416667	884.32	30.9303	3.77825e-08	5
M_0.25_F_qp_Set_8	2.19082	0	0.166667	908.005	54.6149	2.71808e-13	6
M_0.25_F_qp_Set_9	2.0249	0	0.0833333	902.397	49.0068	4.48793e-12	6
M_0.25_F_lqp_Set_1	1.96371	0	0.166667	865.675	12.2855	0.000422642	5
M_0.25_F_lqp_Set_10	2.60698	0	0.208333	888.623	35.2335	4.39416e-09	9
M_0.25_F_lqp_Set_11	2.32761	0	0.166667	856.64	3.25048	0.0387165	12
M_0.25_F_lqp_Set_2	2.03517	0	0.125	864.991	11.6007	0.000595211	5
M_0.25_F_lqp_Set_3	2.05194	0	0.166667	898.684	45.2939	2.87261e-11	5
M_0.25_F_lqp_Set_4	2.76095	0	0.208333	898.919	45.5288	2.55429e-11	4
M_0.25_F_lqp_Set_5	1.64543	0	0.0833333	893.324	39.9345	4.18855e-10	5
M_0.25_F_lqp_Set_6	2.80736	0	0.166667	918.576	65.1864	1.37623e-15	4
M_0.25_F_lqp_Set_7	2.61955	0	0.166667	855.644	2.25389	0.0637239	9
M_0.25_F_lqp_Set_8	1.97786	0	0.0833333	861.851	8.46083	0.00286077	9
M_0.25_F_lqp_Set_9	2.26894	0	0.166667	867.304	13.9138	0.000187232	7
M_0.25_F_lqpt_Set_1	2.11921	0	0.541667	1456.45	603.061	2.19123e-132	42
M_0.25_F_lqpt_Set_10	3.02278	0	0.583333	NA	NA	NA	65
M_0.25_F_lqpt_Set_11	2.82542	0	0.666667	NA	NA	NA	79
M_0.25_F_lqpt_Set_2	2.24022	0	0.25	NA	NA	NA	52
M_0.25_F_lqpt_Set_3	2.17957	0	0.625	2250.68	1397.29	7.5027e-305	45
M_0.25_F_lqpt_Set_4	2.83662	0	0.333333	1296.11	442.718	1.44125e-97	40
M_0.25_F_lqpt_Set_5	1.76517	0	0.583333	NA	NA	NA	48
M_0.25_F_lqpt_Set_6	6.4903	0	0.583333	3046.4	2193.01	0	46
M_0.25_F_lqpt_Set_7	2.85561	0	0.666667	NA	NA	NA	68
M_0.25_F_lqpt_Set_8	2.46936	0	0.625	NA	NA	NA	58
M_0.25_F_lqpt_Set_9	2.38315	0	0.458333	NA	NA	NA	63
M_0.25_F_lqpth_Set_1	1.88041	0	0.708333	NA	NA	NA	51
M_0.25_F_lqpth_Set_10	2.26706	0	0.75	NA	NA	NA	74
M_0.25_F_lqpth_Set_11	2.88013	0	0.833333	NA	NA	NA	86
M_0.25_F_lqpth_Set_2	3.24367	0	0.333333	NA	NA	NA	54
M_0.25_F_lqpth_Set_3	2.56893	0	0.708333	NA	NA	NA	50
M_0.25_F_lqpth_Set_4	2.27965	0	0.375	NA	NA	NA	48
M_0.25_F_lqpth_Set_5	2.04331	0	0.625	NA	NA	NA	51
M_0.25_F_lqpth_Set_6	6.46205	0	0.583333	NA	NA	NA	50
M_0.25_F_lqpth_Set_7	2.78934	0	0.583333	NA	NA	NA	72
M_0.25_F_lqpth_Set_8	2.04508	0	0.791667	NA	NA	NA	66
M_0.25_F_lqpth_Set_9	2.53179	0	0.583333	NA	NA	NA	69
M_0.25_F_lqph_Set_1	2.20053	0	0.291667	NA	NA	NA	63
M_0.25_F_lqph_Set_10	2.16581	0	0.333333	NA	NA	NA	90
M_0.25_F_lqph_Set_11	2.71216	0	0.291667	NA	NA	NA	100
M_0.25_F_lqph_Set_2	2.09224	0	0.125	1041.73	188.335	2.49613e-42	32
M_0.25_F_lqph_Set_3	2.2918	0	0.291667	NA	NA	NA	75
M_0.25_F_lqph_Set_4	2.02287	0	0.208333	NA	NA	NA	53
M_0.25_F_lqph_Set_5	1.87088	0	0.333333	NA	NA	NA	99
M_0.25_F_lqph_Set_6	7.42946	0	0.333333	NA	NA	NA	103
M_0.25_F_lqph_Set_7	2.56959	0	0.25	NA	NA	NA	82
M_0.25_F_lqph_Set_8	2.15358	0	0.375	NA	NA	NA	87
M_0.25_F_lqph_Set_9	1.95933	0	0.333333	NA	NA	NA	96
M_0.5_F_lq_Set_1	1.97025	0	0.208333	879.932	26.5418	3.39048e-07	4
M_0.5_F_lq_Set_10	2.15951	0	0.166667	901.164	47.7742	8.31156e-12	6
M_0.5_F_lq_Set_11	2.05187	0	0.166667	862.285	8.8953	0.00230218	7
M_0.5_F_lq_Set_2	2.12033	0	0.125	866.072	12.6822	0.000346597	4
M_0.5_F_lq_Set_3	2.01359	0	0.166667	899.005	45.6153	2.44622e-11	3
M_0.5_F_lq_Set_4	2.17714	0	0.166667	898.904	45.5138	2.57358e-11	4
M_0.5_F_lq_Set_5	1.67562	0	0.0833333	909.169	55.7795	1.51834e-13	4
M_0.5_F_lq_Set_6	3.02651	0	0.0833333	918.565	65.1751	1.38399e-15	4
M_0.5_F_lq_Set_7	2.08526	0	0.166667	862.594	9.20415	0.00197276	6
M_0.5_F_lq_Set_8	1.96947	0	0.208333	883.74	30.3495	5.05136e-08	6
M_0.5_F_lq_Set_9	2.17126	0	0.125	865.908	12.5185	0.000376165	5
M_0.5_F_lp_Set_1	1.95304	0	0.0833333	924.496	71.1063	7.13178e-17	3
M_0.5_F_lp_Set_10	2.49902	0	0.166667	902.02	48.6303	5.4173e-12	4
M_0.5_F_lp_Set_11	2.78588	0	0.208333	898.422	45.0324	3.27394e-11	9
M_0.5_F_lp_Set_2	3.51027	0	0.166667	911.589	58.199	4.52882e-14	3
M_0.5_F_lp_Set_3	1.99875	0	0.125	927.733	74.3435	1.41331e-17	3
M_0.5_F_lp_Set_4	2.36882	0	0.208333	908.414	55.0236	2.21564e-13	3
M_0.5_F_lp_Set_5	1.69473	0	0.125	923.717	70.3269	1.05303e-16	3
M_0.5_F_lp_Set_6	3.33811	0	0.125	914.429	61.0392	1.09455e-14	2
M_0.5_F_lp_Set_7	2.79846	0	0.208333	906.653	53.2629	5.34355e-13	6
M_0.5_F_lp_Set_8	1.98322	0	0.0833333	901.907	48.5171	5.7329e-12	6
M_0.5_F_lp_Set_9	3.4189	0	0.166667	910.165	56.7748	9.23092e-14	4
M_0.5_F_q_Set_1	2.0447	0	0.125	927.003	73.6132	2.03621e-17	2
M_0.5_F_q_Set_10	2.01762	0	0	930.436	77.0457	3.6598e-18	3
M_0.5_F_q_Set_11	2.09549	0	0.0833333	917.774	64.3838	2.05577e-15	4
M_0.5_F_q_Set_2	38.118	0	0.0833333	919.273	65.8827	9.71596e-16	2
M_0.5_F_q_Set_3	2.27228	0	0.0833333	926.114	72.724	3.17617e-17	2
M_0.5_F_q_Set_4	2.03586	0	0.0416667	930.165	76.7746	4.19122e-18	2
M_0.5_F_q_Set_5	2.00755	0	0.25	934.192	80.802	5.59509e-19	2
M_0.5_F_q_Set_6	25.3819	0	0.208333	936.126	82.7355	2.12782e-19	2
M_0.5_F_q_Set_7	2.12262	0	0.0833333	915.565	62.1746	6.20408e-15	3
M_0.5_F_q_Set_8	2.04969	0	0.125	923.211	69.8207	1.35628e-16	3
M_0.5_F_q_Set_9	2.43958	0	0.0833333	921.061	67.6706	3.97414e-16	3
M_0.5_F_qp_Set_1	2.15755	0	0.125	909.033	55.6435	1.62514e-13	3
M_0.5_F_qp_Set_10	2.03738	0	0.0833333	927.309	73.9194	1.74717e-17	6
M_0.5_F_qp_Set_11	2.0185	0	0.0833333	882.665	29.2754	8.64269e-08	8
M_0.5_F_qp_Set_2	2.00129	0	0.0416667	904.342	50.9519	1.69695e-12	3
M_0.5_F_qp_Set_3	2.35326	0	0.166667	926.773	73.383	2.2846e-17	3
M_0.5_F_qp_Set_4	2.04323	0	0	932.253	78.8629	1.47528e-18	3
M_0.5_F_qp_Set_5	1.99859	0	0.166667	935.689	82.2986	2.64734e-19	3
M_0.5_F_qp_Set_6	5.76675	0	0.208333	935.816	82.4257	2.48438e-19	3
M_0.5_F_qp_Set_7	1.99728	0	0.0416667	885.164	31.7742	2.47774e-08	5
M_0.5_F_qp_Set_8	2.0876	0	0.166667	908.801	55.4113	1.82526e-13	6
M_0.5_F_qp_Set_9	2.00249	0	0.0833333	902.958	49.5683	3.38933e-12	6
M_0.5_F_lqp_Set_1	1.95633	0	0.166667	866.68	13.2896	0.000255822	5
M_0.5_F_lqp_Set_10	2.43209	0	0.208333	890.953	37.5628	1.37111e-09	9
M_0.5_F_lqp_Set_11	2.08099	0	0.208333	855.084	1.69397	0.0843117	11
M_0.5_F_lqp_Set_2	2.03102	0	0.0833333	865.682	12.2918	0.000421312	5
M_0.5_F_lqp_Set_3	1.9713	0	0.166667	899.651	46.2609	1.77138e-11	5
M_0.5_F_lqp_Set_4	2.51197	0	0.208333	899.328	45.9376	2.08213e-11	4
M_0.5_F_lqp_Set_5	1.64749	0	0.0833333	894.897	41.5071	1.90798e-10	5
M_0.5_F_lqp_Set_6	3.11636	0	0.125	918.881	65.4909	1.18185e-15	4
M_0.5_F_lqp_Set_7	2.07505	0	0.125	854.233	0.843027	0.129023	8
M_0.5_F_lqp_Set_8	1.96947	0	0.0833333	860.774	7.38378	0.00490187	8
M_0.5_F_lqp_Set_9	2.07944	0	0.125	865.367	11.9775	0.000493006	6
M_0.5_F_lqpt_Set_1	1.89546	0	0.291667	867.585	14.1949	0.000162687	17
M_0.5_F_lqpt_Set_10	2.01444	0	0.333333	961.214	107.824	7.5857e-25	28
M_0.5_F_lqpt_Set_11	2.38055	0	0.333333	997.009	143.619	1.27985e-32	33
M_0.5_F_lqpt_Set_2	2.2964	0	0.166667	884.006	30.6161	4.4211e-08	16
M_0.5_F_lqpt_Set_3	1.90291	0	0.333333	927.033	73.6435	2.00559e-17	22
M_0.5_F_lqpt_Set_4	2.66189	0	0.25	913.923	60.5326	1.41006e-14	16
M_0.5_F_lqpt_Set_5	1.79187	0	0.291667	921.824	68.4339	2.71329e-16	22
M_0.5_F_lqpt_Set_6	4.41368	0	0.333333	924.314	70.9241	7.81175e-17	16
M_0.5_F_lqpt_Set_7	3.31249	0	0.166667	871.257	17.8672	2.59372e-05	20
M_0.5_F_lqpt_Set_8	2.00378	0	0.375	912.793	59.4032	2.48017e-14	27
M_0.5_F_lqpt_Set_9	2.1648	0	0.291667	900.76	47.3704	1.01713e-11	23
M_0.5_F_lqpth_Set_1	1.93829	0	0.375	883.933	30.5433	4.58492e-08	21
M_0.5_F_lqpth_Set_10	2.06985	0	0.333333	1304.28	450.894	2.41764e-99	40
M_0.5_F_lqpth_Set_11	2.02597	0	0.291667	NA	NA	NA	49
M_0.5_F_lqpth_Set_2	2.40787	0	0.125	942.432	89.042	9.08869e-21	25
M_0.5_F_lqpth_Set_3	2.00638	0	0.291667	985.233	131.843	4.61627e-30	28
M_0.5_F_lqpth_Set_4	2.46727	0	0.25	987.449	134.059	1.52493e-30	27
M_0.5_F_lqpth_Set_5	1.93655	0	0.333333	963.593	110.203	2.30944e-25	27
M_0.5_F_lqpth_Set_6	4.5124	0	0.333333	1294.91	441.524	2.61787e-97	39
M_0.5_F_lqpth_Set_7	2.5358	0	0.208333	956.609	103.219	7.58408e-24	30
M_0.5_F_lqpth_Set_8	1.96666	0	0.458333	1018.86	165.468	2.30591e-37	34
M_0.5_F_lqpth_Set_9	2.32729	0	0.333333	1105.75	252.36	3.12226e-56	36
M_0.5_F_lqph_Set_1	1.86282	0	0.208333	5443.41	4590.02	0	47
M_0.5_F_lqph_Set_10	2.25145	0	0.208333	NA	NA	NA	48
M_0.5_F_lqph_Set_11	2.36131	0	0.208333	NA	NA	NA	49
M_0.5_F_lqph_Set_2	2.07353	0	0.125	910.945	57.5551	6.24884e-14	18
M_0.5_F_lqph_Set_3	2.00008	0	0.166667	NA	NA	NA	53
M_0.5_F_lqph_Set_4	1.98008	0	0.208333	5482.15	4628.76	0	47
M_0.5_F_lqph_Set_5	1.76339	0	0.166667	NA	NA	NA	56
M_0.5_F_lqph_Set_6	5.01587	0	0.25	NA	NA	NA	86
M_0.5_F_lqph_Set_7	2.38761	0	0.166667	1040.06	186.669	5.74198e-42	33
M_0.5_F_lqph_Set_8	1.90706	0	0.25	NA	NA	NA	51
M_0.5_F_lqph_Set_9	2.10263	0	0.166667	2313.21	1459.82	1.98646009829515e-318	45
M_0.75_F_lq_Set_1	1.97644	0	0.208333	880.057	26.6668	3.185e-07	4
M_0.75_F_lq_Set_10	2.13563	0	0.166667	901.396	48.0062	7.40142e-12	6
M_0.75_F_lq_Set_11	2.02668	0	0.125	862.511	9.12104	0.00205646	7
M_0.75_F_lq_Set_2	2.08706	0	0.0833333	866.311	12.9212	0.000307564	4
M_0.75_F_lq_Set_3	2.00931	0	0.166667	899.11	45.7199	2.32152e-11	3
M_0.75_F_lq_Set_4	2.146	0	0.166667	899.06	45.6697	2.38055e-11	4
M_0.75_F_lq_Set_5	1.65295	0	0.0833333	909.267	55.8775	1.44575e-13	4
M_0.75_F_lq_Set_6	3.12375	0	0.125	918.681	65.2913	1.30589e-15	4
M_0.75_F_lq_Set_7	2.0451	0	0.166667	862.844	9.45437	0.00174076	6
M_0.75_F_lq_Set_8	1.97688	0	0.208333	883.878	30.4877	4.71415e-08	6
M_0.75_F_lq_Set_9	2.11619	0	0.125	866.115	12.7247	0.000339305	5
M_0.75_F_lp_Set_1	1.95087	0	0.0833333	924.546	71.1563	6.95545e-17	3
M_0.75_F_lp_Set_10	2.39563	0	0.208333	902.266	48.8764	4.79008e-12	4
M_0.75_F_lp_Set_11	2.44047	0	0.208333	899.534	46.1437	1.87825e-11	9
M_0.75_F_lp_Set_2	3.24462	0	0.166667	911.934	58.5438	3.81158e-14	3
M_0.75_F_lp_Set_3	1.97784	0	0.0833333	928.081	74.6913	1.18775e-17	3
M_0.75_F_lp_Set_4	2.26714	0	0.208333	906.258	52.8683	6.50907e-13	2
M_0.75_F_lp_Set_5	1.61175	0	0.0833333	924.035	70.6452	8.98087e-17	3
M_0.75_F_lp_Set_6	3.28491	0	0.125	914.517	61.1271	1.04749e-14	2
M_0.75_F_lp_Set_7	2.58176	0	0.208333	904.579	51.1888	1.50741e-12	5
M_0.75_F_lp_Set_8	1.98397	0	0.0833333	902.566	49.1763	4.1231e-12	6
M_0.75_F_lp_Set_9	3.42546	0	0.166667	910.285	56.8953	8.69099e-14	4
M_0.75_F_q_Set_1	2.04251	0	0.125	927.042	73.652	1.99707e-17	2
M_0.75_F_q_Set_10	2.02366	0	0	930.484	77.0939	3.57269e-18	3
M_0.75_F_q_Set_11	2.09243	0	0.0833333	917.83	64.4398	1.99899e-15	4
M_0.75_F_q_Set_2	32.1698	0	0.0833333	919.309	65.919	9.54133e-16	2
M_0.75_F_q_Set_3	2.24994	0	0.0833333	926.149	72.7586	3.1218e-17	2
M_0.75_F_q_Set_4	2.03154	0	0	930.214	76.8239	4.08911e-18	2
M_0.75_F_q_Set_5	2.00672	0	0.25	934.236	80.8456	5.47439e-19	2
M_0.75_F_q_Set_6	26.476	0	0.208333	936.149	82.7588	2.10323e-19	2
M_0.75_F_q_Set_7	2.08526	0	0.0833333	915.615	62.2251	6.04946e-15	3
M_0.75_F_q_Set_8	2.05108	0	0.0833333	923.258	69.8677	1.32481e-16	3
M_0.75_F_q_Set_9	2.43476	0	0.0833333	921.104	67.7139	3.88912e-16	3
M_0.75_F_qp_Set_1	2.05932	0	0.166667	909.886	56.4961	1.06108e-13	3
M_0.75_F_qp_Set_10	2.04887	0	0.125	928.916	75.526	7.82482e-18	6
M_0.75_F_qp_Set_11	1.9993	0	0.0833333	884.187	30.7971	4.03859e-08	8
M_0.75_F_qp_Set_2	2.00119	0	0.0416667	904.629	51.2392	1.46984e-12	3
M_0.75_F_qp_Set_3	2.26526	0	0.166667	926.983	73.5929	2.05704e-17	3
M_0.75_F_qp_Set_4	2.05756	0	0	932.462	79.0717	1.32904e-18	3
M_0.75_F_qp_Set_5	2.0025	0	0.166667	935.954	82.5642	2.31816e-19	3
M_0.75_F_qp_Set_6	3.08903	0	0.208333	935.903	82.5132	2.37804e-19	3
M_0.75_F_qp_Set_7	1.99755	0	0.0416667	886.239	32.849	1.44764e-08	5
M_0.75_F_qp_Set_8	2.00548	0	0.166667	909.832	56.4419	1.09023e-13	6
M_0.75_F_qp_Set_9	2.00154	0	0.0833333	903.75	50.3598	2.28161e-12	6
M_0.75_F_lqp_Set_1	1.93929	0	0.125	867.959	14.5692	0.000134914	5
M_0.75_F_lqp_Set_10	2.41494	0	0.208333	890.885	37.4955	1.418e-09	8
M_0.75_F_lqp_Set_11	2.00753	0	0.208333	857.757	4.36709	0.0221527	11
M_0.75_F_lqp_Set_2	2.02264	0	0.0833333	866.727	13.3372	0.000249805	5
M_0.75_F_lqp_Set_3	1.97086	0	0.166667	900.912	47.5217	9.4301e-12	5
M_0.75_F_lqp_Set_4	2.41509	0	0.208333	897.287	43.8969	5.77607e-11	3
M_0.75_F_lqp_Set_5	1.612	0	0.0833333	894.105	40.7147	2.83559e-10	4
M_0.75_F_lqp_Set_6	3.28628	0	0.125	914.517	61.1271	1.04749e-14	2
M_0.75_F_lqp_Set_7	2.03668	0	0.125	853.39	0	0.196666	7
M_0.75_F_lqp_Set_8	1.96467	0	0.125	863.327	9.93705	0.0013675	8
M_0.75_F_lqp_Set_9	2.0417	0	0.125	866.557	13.167	0.000271988	6
M_0.75_F_lqpt_Set_1	1.72611	0	0.208333	860.807	7.41718	0.00482069	12
M_0.75_F_lqpt_Set_10	2.04322	0	0.25	900	46.6103	1.48737e-11	17
M_0.75_F_lqpt_Set_11	2.09116	0	0.208333	875.188	21.7981	3.63348e-06	20
M_0.75_F_lqpt_Set_2	2.06779	0	0.125	877.586	24.1957	1.09572e-06	11
M_0.75_F_lqpt_Set_3	1.70837	0	0.333333	901.42	48.03	7.31378e-12	13
M_0.75_F_lqpt_Set_4	2.40635	0	0.25	899.346	45.9562	2.06283e-11	10
M_0.75_F_lqpt_Set_5	1.62865	0	0.208333	893.178	39.7877	4.5075e-10	12
M_0.75_F_lqpt_Set_6	3.50689	0	0.208333	916.779	63.3893	3.38e-15	11
M_0.75_F_lqpt_Set_7	2.91687	0	0.166667	853.925	0.534641	0.150533	13
M_0.75_F_lqpt_Set_8	1.95782	0	0.166667	875.634	22.2442	2.90707e-06	19
M_0.75_F_lqpt_Set_9	2.04321	0	0.208333	886.476	33.0858	1.286e-08	17
M_0.75_F_lqpth_Set_1	2.06507	0	0.125	877.667	24.2769	1.05213e-06	16
M_0.75_F_lqpth_Set_10	1.97781	0	0.25	907.837	54.4466	2.95658e-13	20
M_0.75_F_lqpth_Set_11	2.15099	0	0.25	918.629	65.2393	1.3403e-15	26
M_0.75_F_lqpth_Set_2	2.0723	0	0.0833333	888.364	34.9741	5.00261e-09	14
M_0.75_F_lqpth_Set_3	1.9351	0	0.166667	1042.1	188.708	2.07175e-42	31
M_0.75_F_lqpth_Set_4	2.45574	0	0.25	949.479	96.0893	2.68043e-22	21
M_0.75_F_lqpth_Set_5	1.86599	0	0.208333	931.083	77.6927	2.64833e-18	21
M_0.75_F_lqpth_Set_6	3.42281	0	0.208333	1011.59	158.201	8.72586e-36	27
M_0.75_F_lqpth_Set_7	2.67757	0	0.166667	881.367	27.9768	1.65445e-07	19
M_0.75_F_lqpth_Set_8	1.92504	0	0.291667	914.912	61.5221	8.59766e-15	25
M_0.75_F_lqpth_Set_9	2.07677	0	0.166667	908.839	55.449	1.79115e-13	21
M_0.75_F_lqph_Set_1	2.0749	0	0.0833333	1009.34	155.949	2.69057e-35	30
M_0.75_F_lqph_Set_10	2.62404	0	0.208333	1279.33	425.939	6.34381e-94	39
M_0.75_F_lqph_Set_11	2.25538	0	0.208333	918.734	65.3438	1.27204e-15	24
M_0.75_F_lqph_Set_2	2.07945	0	0.0833333	885.978	32.5883	1.64922e-08	12
M_0.75_F_lqph_Set_3	2.00085	0	0.166667	1306.43	453.037	8.27808e-100	39
M_0.75_F_lqph_Set_4	2.50177	0	0.166667	1043.19	189.8	1.19975e-42	30
M_0.75_F_lqph_Set_5	1.65684	0	0.0833333	1243.73	390.344	3.40089e-86	38
M_0.75_F_lqph_Set_6	3.6564	0	0.25	NA	NA	NA	69
M_0.75_F_lqph_Set_7	2.57375	0	0.166667	888.738	35.3485	4.14859e-09	18
M_0.75_F_lqph_Set_8	1.77875	0	0.166667	931.696	78.3065	1.94847e-18	24
M_0.75_F_lqph_Set_9	2.09515	0	0.125	890.513	37.1233	1.70804e-09	14
M_1_F_lq_Set_1	1.96716	0	0.208333	880.226	26.8357	2.92702e-07	4
M_1_F_lq_Set_10	2.15669	0	0.166667	901.714	48.3242	6.31349e-12	6
M_1_F_lq_Set_11	2.014	0	0.125	862.819	9.42859	0.00176334	7
M_1_F_lq_Set_2	2.04999	0	0.0833333	866.63	13.2404	0.000262189	4
M_1_F_lq_Set_3	2.00467	0	0.125	899.25	45.8598	2.16472e-11	3
M_1_F_lq_Set_4	2.15965	0	0.166667	899.271	45.8811	2.1418e-11	4
M_1_F_lq_Set_5	1.84527	0	0.0833333	909.4	56.01	1.35304e-13	4
M_1_F_lq_Set_6	3.26504	0	0.125	918.839	65.4488	1.207e-15	4
M_1_F_lq_Set_7	2.02258	0	0.125	863.175	9.78537	0.00147524	6
M_1_F_lq_Set_8	1.96586	0	0.208333	884.064	30.6742	4.29452e-08	6
M_1_F_lq_Set_9	2.07279	0	0.125	866.4	13.0096	0.000294254	5
M_1_F_lp_Set_1	1.95047	0	0.0833333	924.611	71.2207	6.73505e-17	3
M_1_F_lp_Set_10	2.31066	0	0.208333	902.608	49.218	4.03814e-12	4
M_1_F_lp_Set_11	2.19495	0	0.208333	901.077	47.6875	8.67985e-12	9
M_1_F_lp_Set_2	3.23143	0	0.166667	912.401	59.0114	3.01696e-14	3
M_1_F_lp_Set_3	1.77791	0	0.125	928.563	75.1735	9.33259e-18	3
M_1_F_lp_Set_4	2.26207	0	0.208333	906.364	52.9736	6.17531e-13	2
M_1_F_lp_Set_5	1.54898	0	0.0833333	924.475	71.0851	7.20761e-17	3
M_1_F_lp_Set_6	3.10862	0	0.125	914.637	61.2475	9.86297e-15	2
M_1_F_lp_Set_7	2.3223	0	0.208333	905.118	51.7277	1.15131e-12	5
M_1_F_lp_Set_8	1.98274	0	0.0833333	903.465	50.0754	2.63027e-12	6
M_1_F_lp_Set_9	3.34921	0	0.166667	910.449	57.0589	8.00852e-14	4
M_1_F_q_Set_1	2.03834	0	0.125	927.096	73.7058	1.94411e-17	2
M_1_F_q_Set_10	2.01799	0	0.0416667	930.548	77.1579	3.46023e-18	3
M_1_F_q_Set_11	2.09518	0	0.0833333	917.906	64.5162	1.92404e-15	4
M_1_F_q_Set_2	30.649	0	0.0833333	919.36	65.9698	9.30202e-16	2
M_1_F_q_Set_3	2.24444	0	0.0833333	926.194	72.8042	3.05135e-17	2
M_1_F_q_Set_4	2.04191	0	0	930.28	76.8897	3.95685e-18	2
M_1_F_q_Set_5	2.00632	0	0.25	934.295	80.9047	5.31486e-19	2
M_1_F_q_Set_6	27.6913	0	0.208333	936.177	82.7874	2.07331e-19	2
M_1_F_q_Set_7	2.08931	0	0.0833333	915.686	62.2958	5.83951e-15	3
M_1_F_q_Set_8	2.0428	0	0.0833333	923.321	69.9313	1.28335e-16	3
M_1_F_q_Set_9	2.40136	0	0.0833333	921.16	67.7705	3.78054e-16	3
M_1_F_qp_Set_1	2.00006	0	0.166667	910.843	57.4526	6.57751e-14	3
M_1_F_qp_Set_10	2.10903	0	0.125	926.959	73.5687	2.08202e-17	5
M_1_F_qp_Set_11	1.99807	0	0.0833333	888.954	35.5643	3.7243e-09	9
M_1_F_qp_Set_2	2.00087	0	0.0416667	905.017	51.6266	1.21104e-12	3
M_1_F_qp_Set_3	2.2093	0	0.125	927.269	73.8793	1.78256e-17	3
M_1_F_qp_Set_4	2.33617	0	0	932.74	79.3505	1.15605e-18	3
M_1_F_qp_Set_5	1.99961	0	0.166667	936.311	82.9206	1.9398e-19	3
M_1_F_qp_Set_6	2.47906	0	0.208333	936.018	82.6278	2.24559e-19	3
M_1_F_qp_Set_7	1.99663	0	0.0416667	887.452	34.0621	7.8929e-09	5
M_1_F_qp_Set_8	1.99818	0	0.166667	908.408	55.0182	2.22162e-13	5
M_1_F_qp_Set_9	2.00176	0	0.0416667	904.709	51.3191	1.41229e-12	6
M_1_F_lqp_Set_1	1.9415	0	0.125	869.399	16.0087	6.56886e-05	5
M_1_F_lqp_Set_10	2.33979	0	0.208333	888.056	34.6663	5.83481e-09	6
M_1_F_lqp_Set_11	1.99925	0	0.208333	857.525	4.13523	0.0248757	10
M_1_F_lqp_Set_2	2.00974	0	0.0833333	868.065	14.6749	0.000127972	5
M_1_F_lqp_Set_3	1.98556	0	0.166667	902.34	48.9497	4.61776e-12	5
M_1_F_lqp_Set_4	2.32825	0	0.208333	897.71	44.3203	4.67401e-11	3
M_1_F_lqp_Set_5	1.59331	0	0.0833333	895.452	42.0622	1.4456e-10	4
M_1_F_lqp_Set_6	3.10862	0	0.125	914.637	61.2475	9.86297e-15	2
M_1_F_lqp_Set_7	2.01224	0	0.125	855.058	1.66826	0.0854024	7
M_1_F_lqp_Set_8	1.93447	0	0.125	866.322	12.932	0.000305896	8
M_1_F_lqp_Set_9	2.0132	0	0.125	868.1	14.7097	0.000125765	6
M_1_F_lqpt_Set_1	1.72742	0	0.25	872.302	18.9122	1.53812e-05	11
M_1_F_lqpt_Set_10	2.03495	0	0.25	899.175	45.7851	2.24706e-11	15
M_1_F_lqpt_Set_11	1.99896	0	0.208333	868.652	15.2618	9.54269e-05	16
M_1_F_lqpt_Set_2	2.01107	0	0.125	870.938	17.5484	3.04183e-05	7
M_1_F_lqpt_Set_3	1.55279	0	0.166667	900.153	46.7633	1.37786e-11	8
M_1_F_lqpt_Set_4	2.43196	0	0.166667	896.648	43.2579	7.95046e-11	8
M_1_F_lqpt_Set_5	1.58255	0	0.208333	892.694	39.3044	5.7397e-10	10
M_1_F_lqpt_Set_6	3.63297	0	0.125	914.093	60.7034	1.29465e-14	7
M_1_F_lqpt_Set_7	2.28287	0	0.166667	856.339	2.94879	0.0450202	10
M_1_F_lqpt_Set_8	1.81395	0	0.208333	865.402	12.0125	0.00048446	13
M_1_F_lqpt_Set_9	2.05711	0	0.0833333	874.902	21.5118	4.1928e-06	11
M_1_F_lqpth_Set_1	1.93064	0	0.0833333	883.122	29.7323	6.87759e-08	14
M_1_F_lqpth_Set_10	1.94782	0	0.25	948.31	94.9202	4.80921e-22	24
M_1_F_lqpth_Set_11	2.16428	0	0.166667	916.369	62.9786	4.15051e-15	24
M_1_F_lqpth_Set_2	2.0649	0	0.0833333	881.496	28.106	1.55091e-07	11
M_1_F_lqpth_Set_3	1.98618	0	0.166667	1027.52	174.13	3.03281e-39	29
M_1_F_lqpth_Set_4	2.30891	0	0.208333	909.927	56.5367	1.0398e-13	12
M_1_F_lqpth_Set_5	1.81318	0	0.208333	943.342	89.9518	5.76695e-21	21
M_1_F_lqpth_Set_6	2.94025	0	0.125	1133.27	279.879	3.3022e-62	34
M_1_F_lqpth_Set_7	2.10358	0	0.166667	875.541	22.1512	3.04547e-06	15
M_1_F_lqpth_Set_8	1.88008	0	0.125	881.993	28.6026	1.20991e-07	17
M_1_F_lqpth_Set_9	2.0608	0	0.125	888.462	35.0722	4.76311e-09	15
M_1_F_lqph_Set_1	1.96324	0	0.0833333	898.383	44.9926	3.33968e-11	16
M_1_F_lqph_Set_10	2.40927	0	0.208333	953.91	100.52	2.92469e-23	23
M_1_F_lqph_Set_11	2.11301	0	0.208333	895.647	42.2566	1.31168e-10	20
M_1_F_lqph_Set_2	2.06537	0	0.0833333	890.485	37.0947	1.73266e-09	13
M_1_F_lqph_Set_3	1.99601	0	0.166667	991.272	137.882	2.25449e-31	25
M_1_F_lqph_Set_4	2.33012	0	0.208333	912.033	58.6432	3.62678e-14	11
M_1_F_lqph_Set_5	1.58453	0	0.0833333	1093.7	240.312	1.29011e-53	33
M_1_F_lqph_Set_6	2.80067	0	0.166667	NA	NA	NA	53
M_1_F_lqph_Set_7	2.10713	0	0.166667	876.963	23.5733	1.49576e-06	15
M_1_F_lqph_Set_8	2.00198	0	0.0833333	914.894	61.5041	8.67532e-15	21
M_1_F_lqph_Set_9	2.06735	0	0.125	884.324	30.9341	3.77111e-08	12
M_2_F_lq_Set_1	1.94495	0	0.166667	881.288	27.8976	1.72125e-07	4
M_2_F_lq_Set_10	2.32274	0	0.208333	897.98	44.5899	4.08456e-11	4
M_2_F_lq_Set_11	2.00431	0	0.125	864.817	11.4272	0.000649146	7
M_2_F_lq_Set_2	2.0138	0	0.0833333	868.576	15.186	9.91151e-05	4
M_2_F_lq_Set_3	2.0014	0	0.125	900.116	46.7265	1.40343e-11	3
M_2_F_lq_Set_4	2.3306	0	0.208333	897.609	44.2188	4.91746e-11	3
M_2_F_lq_Set_5	1.84646	0	0.0833333	910.243	56.8528	8.87785e-14	4
M_2_F_lq_Set_6	3.04057	0	0.125	914.608	61.2181	1.00091e-14	2
M_2_F_lq_Set_7	2.00466	0	0.125	862.333	8.9435	0.00224736	5
M_2_F_lq_Set_8	1.94386	0	0.166667	885.238	31.8479	2.3881e-08	6
M_2_F_lq_Set_9	2.01785	0	0.125	868.276	14.8862	0.000115142	5
M_2_F_lp_Set_1	1.95071	0	0.0833333	925.017	71.6275	5.49562e-17	3
M_2_F_lp_Set_10	2.16101	0	0.208333	905.019	51.629	1.20955e-12	4
M_2_F_lp_Set_11	2.15039	0	0.208333	906.271	52.8812	6.46729e-13	8
M_2_F_lp_Set_2	3.23915	0	0.166667	911.669	58.279	4.35121e-14	2
M_2_F_lp_Set_3	1.58811	0	0.0833333	931.825	78.4346	1.82754e-18	3
M_2_F_lp_Set_4	2.16687	0	0.208333	907.067	53.6773	4.34371e-13	2
M_2_F_lp_Set_5	1.4655	0	0.0833333	927.473	74.0826	1.61022e-17	3
M_2_F_lp_Set_6	2.67599	0	0.125	915.466	62.0765	6.51611e-15	2
M_2_F_lp_Set_7	2.12232	0	0.208333	908.7	55.3101	1.91995e-13	5
M_2_F_lp_Set_8	1.89074	0	0.0833333	901.89	48.5005	5.78071e-12	4
M_2_F_lp_Set_9	2.97286	0	0.166667	911.552	58.1617	4.61408e-14	4
M_2_F_q_Set_1	2.03054	0	0.125	927.453	74.0634	1.62577e-17	2
M_2_F_q_Set_10	2.27332	0	0.25	930.959	77.569	2.81729e-18	3
M_2_F_q_Set_11	2.06133	0	0.0833333	918.412	65.0218	1.49424e-15	4
M_2_F_q_Set_2	14.7884	0	0.0833333	919.709	66.3189	7.81189e-16	2
M_2_F_q_Set_3	2.18677	0	0.0833333	926.489	73.0988	2.63346e-17	2
M_2_F_q_Set_4	2.2965	0	0	930.7	77.3097	3.20732e-18	2
M_2_F_q_Set_5	2.00821	0	0.166667	934.683	81.2933	4.37633e-19	2
M_2_F_q_Set_6	34.0129	0	0.208333	936.351	82.9608	1.90113e-19	2
M_2_F_q_Set_7	2.07662	0	0.0833333	916.169	62.7788	4.58663e-15	3
M_2_F_q_Set_8	2.03401	0	0.0833333	923.74	70.3498	1.04101e-16	3
M_2_F_q_Set_9	2.34557	0	0.0833333	921.521	68.1306	3.15754e-16	3
M_2_F_qp_Set_1	1.99728	0	0.166667	915.171	61.781	7.55345e-15	3
M_2_F_qp_Set_10	2.02979	0	0.208333	930.782	77.3916	3.07857e-18	5
M_2_F_qp_Set_11	1.99878	0	0.0416667	897.146	43.7556	6.19892e-11	9
M_2_F_qp_Set_2	2.00065	0	0.0833333	907.48	54.0904	3.53301e-13	3
M_2_F_qp_Set_3	2.02737	0	0.125	929.152	75.7616	6.95505e-18	3
M_2_F_qp_Set_4	1.98583	0	0.0833333	934.508	81.1185	4.77617e-19	3
M_2_F_qp_Set_5	NA	NA	0	938.52	85.1305	6.42509e-20	3
M_2_F_qp_Set_6	2.39488	0	0.208333	936.809	83.4187	1.51214e-19	3
M_2_F_qp_Set_7	1.99741	0	0.0416667	895.878	42.4884	1.16811e-10	6
M_2_F_qp_Set_8	1.99728	0	0.166667	914.087	60.6971	1.29873e-14	5
M_2_F_qp_Set_9	2.00143	0	0.0833333	907.121	53.7307	4.22914e-13	5
M_2_F_lqp_Set_1	1.90024	0	0.125	876.017	22.6275	2.40013e-06	5
M_2_F_lqp_Set_10	2.15963	0	0.208333	894.991	41.6009	1.82056e-10	5
M_2_F_lqp_Set_11	2.00144	0	0.166667	862.613	9.22318	0.00195407	8
M_2_F_lqp_Set_2	2.00221	0	0.125	869.598	16.2079	5.94614e-05	4
M_2_F_lqp_Set_3	1.98255	0	0.125	905.484	52.0936	9.58853e-13	4
M_2_F_lqp_Set_4	2.17033	0	0.208333	900.22	46.8304	1.33241e-11	3
M_2_F_lqp_Set_5	1.42901	0	0.0833333	906.04	52.6497	7.26097e-13	5
M_2_F_lqp_Set_6	2.67599	0	0.125	915.466	62.0765	6.51611e-15	2
M_2_F_lqp_Set_7	2.00128	0	0.166667	862.565	9.1746	0.00200211	7
M_2_F_lqp_Set_8	1.90033	0	0.125	873.498	20.108	8.45917e-06	7
M_2_F_lqp_Set_9	2.00236	0	0.125	869.539	16.1486	6.12507e-05	4
M_2_F_lqpt_Set_1	1.98004	0	0.25	872.661	19.2709	1.28561e-05	7
M_2_F_lqpt_Set_10	2.11094	0	0.166667	896.105	42.7153	1.04286e-10	8
M_2_F_lqpt_Set_11	2.66531	0	0.166667	865.18	11.7896	0.000541575	10
M_2_F_lqpt_Set_2	2.86341	0	0.125	871.501	18.1112	2.29584e-05	5
M_2_F_lqpt_Set_3	1.51871	0	0.208333	903.663	50.2735	2.38218e-12	4
M_2_F_lqpt_Set_4	2.11769	0	0.166667	896.22	42.8298	9.84841e-11	4
M_2_F_lqpt_Set_5	1.27358	0	0.0833333	910.968	57.5781	6.1773e-14	8
M_2_F_lqpt_Set_6	2.67599	0	0.125	916.363	62.9731	4.16193e-15	4
M_2_F_lqpt_Set_7	2.66505	0	0.166667	862.97	9.57998	0.00163479	9
M_2_F_lqpt_Set_8	1.97893	0	0.25	872.145	18.7551	1.66385e-05	9
M_2_F_lqpt_Set_9	2.73064	0	0.125	871.438	18.048	2.36952e-05	5
M_2_F_lqpth_Set_1	1.91547	0	0.0833333	885.482	32.0925	2.11317e-08	11
M_2_F_lqpth_Set_10	2.11345	0	0.166667	938.372	84.982	6.92029e-20	19
M_2_F_lqpth_Set_11	2.00919	0	0.125	881.909	28.5192	1.26143e-07	15
M_2_F_lqpth_Set_2	2.0203	0	0.125	876.722	23.3316	1.68786e-06	8
M_2_F_lqpth_Set_3	1.99485	0	0.208333	932.698	79.3076	1.18115e-18	14
M_2_F_lqpth_Set_4	2.06081	0	0.166667	900.082	46.6922	1.42771e-11	6
M_2_F_lqpth_Set_5	1.57262	0	0.0833333	1003.16	149.772	5.90405e-34	26
M_2_F_lqpth_Set_6	2.52288	0	0.166667	972.573	119.183	2.5909e-27	19
M_2_F_lqpth_Set_7	2.00848	0	0.125	868.584	15.1936	9.87378e-05	11
M_2_F_lqpth_Set_8	1.94289	0	0.0833333	907.955	54.565	2.78667e-13	18
M_2_F_lqpth_Set_9	2.01953	0	0.125	879.742	26.3525	3.72697e-07	9
M_2_F_lqph_Set_1	1.91772	0	0.0833333	897.368	43.9776	5.54769e-11	14
M_2_F_lqph_Set_10	2.1059	0	0.166667	938.642	85.2517	6.04724e-20	19
M_2_F_lqph_Set_11	2.00895	0	0.125	878.208	24.818	8.02735e-07	14
M_2_F_lqph_Set_2	2.01797	0	0.125	873.834	20.4442	7.15037e-06	7
M_2_F_lqph_Set_3	1.99844	0	0.208333	951.471	98.0815	9.89904e-23	18
M_2_F_lqph_Set_4	2.05445	0	0.166667	902.809	49.4192	3.65168e-12	7
M_2_F_lqph_Set_5	1.57949	0	0.0833333	1003.39	150.003	5.25921e-34	26
M_2_F_lqph_Set_6	2.52288	0	0.166667	998.515	145.125	6.02806e-33	23
M_2_F_lqph_Set_7	2.00829	0	0.125	868.618	15.2282	9.7044e-05	11
M_2_F_lqph_Set_8	1.93559	0	0.0833333	940.487	87.0975	2.403e-20	23
M_2_F_lqph_Set_9	2.0184	0	0.125	873.794	20.404	7.29548e-06	7
M_3_F_lq_Set_1	1.92758	0	0.166667	882.871	29.481	7.79833e-08	4
M_3_F_lq_Set_10	2.21174	0	0.208333	899.104	45.7145	2.3278e-11	4
M_3_F_lq_Set_11	2.00149	0	0.125	865.051	11.6606	0.000577648	6
M_3_F_lq_Set_2	2.00392	0	0.0833333	867.52	14.1298	0.000168067	3
M_3_F_lq_Set_3	1.98471	0	0.125	901.397	48.0067	7.3997e-12	3
M_3_F_lq_Set_4	2.20959	0	0.208333	898.613	45.223	2.97637e-11	3
M_3_F_lq_Set_5	1.48978	0	0.0833333	911.528	58.1384	4.668e-14	4
M_3_F_lq_Set_6	2.80634	0	0.125	914.914	61.5238	8.59037e-15	2
M_3_F_lq_Set_7	2.00137	0	0.125	863.857	10.4669	0.00104924	5
M_3_F_lq_Set_8	1.92756	0	0.166667	887.002	33.6123	9.88353e-09	6
M_3_F_lq_Set_9	2.00412	0	0.0833333	868.603	15.2128	9.77927e-05	4
M_3_F_lp_Set_1	1.97431	0	0.0833333	925.681	72.2911	3.9438e-17	3
M_3_F_lp_Set_10	2.14414	0	0.208333	909.431	56.0414	1.33196e-13	4
M_3_F_lp_Set_11	2.11285	0	0.166667	904.7	51.3098	1.41887e-12	6
M_3_F_lp_Set_2	2.98226	0	0.166667	912.576	59.1859	2.76484e-14	2
M_3_F_lp_Set_3	1.56164	0	0.0833333	933.871	80.4811	6.5688e-19	2
M_3_F_lp_Set_4	2.14329	0	0.208333	908.242	54.8518	2.41439e-13	2
M_3_F_lp_Set_5	1.47891	0	0.0833333	932.587	79.1973	1.24809e-18	3
M_3_F_lp_Set_6	2.57257	0	0.125	916.912	63.5224	3.1624e-15	2
M_3_F_lp_Set_7	2.10985	0	0.166667	909.057	55.6673	1.60593e-13	4
M_3_F_lp_Set_8	1.97772	0	0.0833333	905.255	51.8654	1.07472e-12	4
M_3_F_lp_Set_9	2.46579	0	0.166667	913.448	60.0579	1.78777e-14	4
M_3_F_q_Set_1	1.9696	0	0.125	928.025	74.635	1.22164e-17	2
M_3_F_q_Set_10	23.7596	0	0.166667	931.617	78.227	2.02748e-18	3
M_3_F_q_Set_11	2.07378	0	0.0833333	919.231	65.8408	9.92177e-16	4
M_3_F_q_Set_2	4.88298	0	0.0833333	920.295	66.905	5.82755e-16	2
M_3_F_q_Set_3	2.16392	0	0.0833333	926.965	73.5755	2.07498e-17	2
M_3_F_q_Set_4	23.4184	0	0.0833333	931.357	77.9672	2.30865e-18	2
M_3_F_q_Set_5	5.47308	0	0.125	935.308	81.9178	3.20259e-19	2
M_3_F_q_Set_6	66.9205	0	0.166667	936.632	83.2418	1.65194e-19	2
M_3_F_q_Set_7	2.07197	0	0.0833333	916.972	63.5824	3.06888e-15	3
M_3_F_q_Set_8	2.03892	0	0.0833333	924.42	71.0297	7.41001e-17	3
M_3_F_q_Set_9	2.31815	0	0.0833333	922.098	68.7079	2.36592e-16	3
M_3_F_qp_Set_1	1.99547	0	0.125	919.916	66.5259	7.04377e-16	3
M_3_F_qp_Set_10	2.20892	0	0.208333	936.544	83.1538	1.72627e-19	5
M_3_F_qp_Set_11	1.99598	0	0.0416667	907.191	53.8015	4.082e-13	9
M_3_F_qp_Set_2	2.00056	0	0.0833333	911.333	57.9431	5.14692e-14	3
M_3_F_qp_Set_3	1.99565	0	0.125	932.26	78.8701	1.46995e-18	3
M_3_F_qp_Set_4	NA	NA	0	937.306	83.9162	1.17911e-19	3
M_3_F_qp_Set_5	NA	NA	0	939.037	85.6469	4.96299e-20	2
M_3_F_qp_Set_6	36.2332	0	0.208333	938.353	84.9627	6.98751e-20	3
M_3_F_qp_Set_7	1.99598	0	0.0416667	902.936	49.5458	3.42772e-12	6
M_3_F_qp_Set_8	1.99547	0	0.125	921.005	67.6145	4.08712e-16	5
M_3_F_qp_Set_9	2.00062	0	0.0833333	910.627	57.2369	7.3265e-14	4
M_3_F_lqp_Set_1	1.99853	0	0.0833333	883.547	30.1573	5.56091e-08	5
M_3_F_lqp_Set_10	2.14313	0	0.208333	904.044	50.6545	1.96896e-12	5
M_3_F_lqp_Set_11	2.0015	0	0.166667	873.226	19.8361	9.69125e-06	8
M_3_F_lqp_Set_2	2.00244	0	0.125	874.664	21.2737	4.72283e-06	4
M_3_F_lqp_Set_3	1.97156	0	0.166667	908.04	54.6499	2.6709e-13	3
M_3_F_lqp_Set_4	2.14401	0	0.208333	903.739	50.3491	2.29381e-12	3
M_3_F_lqp_Set_5	1.48904	0	0.0833333	917.06	63.6704	2.93689e-15	5
M_3_F_lqp_Set_6	2.57257	0	0.125	916.912	63.5224	3.1624e-15	2
M_3_F_lqp_Set_7	2.00145	0	0.166667	870.891	17.5013	3.11441e-05	7
M_3_F_lqp_Set_8	1.99861	0	0.0833333	882.151	28.7613	1.1176e-07	6
M_3_F_lqp_Set_9	2.00258	0	0.125	874.606	21.2156	4.86214e-06	4
M_3_F_lqpt_Set_1	1.98793	0	0.208333	881.678	28.2877	1.41624e-07	7
M_3_F_lqpt_Set_10	2.12132	0	0.166667	903.132	49.7421	3.10715e-12	6
M_3_F_lqpt_Set_11	2.59946	0	0.166667	872.805	19.4148	1.19635e-05	9
M_3_F_lqpt_Set_2	2.48732	0	0.125	876.804	23.4136	1.62007e-06	5
M_3_F_lqpt_Set_3	1.52864	0	0.208333	908.454	55.0638	2.17155e-13	4
M_3_F_lqpt_Set_4	2.12026	0	0.166667	900.609	47.2187	1.09729e-11	4
M_3_F_lqpt_Set_5	1.27358	0	0.0833333	919.371	65.9807	9.25143e-16	7
M_3_F_lqpt_Set_6	2.57257	0	0.125	916.912	63.5224	3.1624e-15	2
M_3_F_lqpt_Set_7	2.56952	0	0.166667	872.865	19.4749	1.16096e-05	9
M_3_F_lqpt_Set_8	1.98739	0	0.208333	881.878	28.4885	1.28094e-07	8
M_3_F_lqpt_Set_9	2.49747	0	0.125	876.739	23.3487	1.67346e-06	5
M_3_F_lqpth_Set_1	1.69817	0	0.0833333	886.184	32.7936	1.48832e-08	9
M_3_F_lqpth_Set_10	1.98218	0	0.125	924.516	71.1258	7.06258e-17	14
M_3_F_lqpth_Set_11	1.63752	0	0.125	869.405	16.0149	6.54845e-05	9
M_3_F_lqpth_Set_2	2.01846	0	0.125	877.933	24.5435	9.20815e-07	7
M_3_F_lqpth_Set_3	1.99431	0	0.125	905.619	52.229	8.96069e-13	4
M_3_F_lqpth_Set_4	1.97694	0	0.125	902.757	49.3669	3.74838e-12	6
M_3_F_lqpth_Set_5	1.50097	0	0.0833333	983.919	130.529	8.90458e-30	23
M_3_F_lqpth_Set_6	2.23802	0	0.125	963.884	110.494	1.99599e-25	17
M_3_F_lqpth_Set_7	1.62977	0	0.125	869.441	16.0506	6.4326e-05	9
M_3_F_lqpth_Set_8	1.6943	0	0.0833333	900.28	46.8905	1.29295e-11	14
M_3_F_lqpth_Set_9	2.01848	0	0.125	877.879	24.4889	9.46304e-07	7
M_3_F_lqph_Set_1	1.67339	0	0.0833333	886.207	32.8168	1.4711e-08	9
M_3_F_lqph_Set_10	1.98412	0	0.125	990.74	137.351	2.94062e-31	25
M_3_F_lqph_Set_11	1.67148	0	0.125	875.786	22.3957	2.69505e-06	11
M_3_F_lqph_Set_2	2.01979	0	0.125	875.168	21.7784	3.66957e-06	6
M_3_F_lqph_Set_3	1.99405	0	0.125	910.715	57.3253	7.0098e-14	6
M_3_F_lqph_Set_4	1.97993	0	0.125	902.756	49.3663	3.7495e-12	6
M_3_F_lqph_Set_5	1.50352	0	0.0833333	1109.37	255.977	5.11816e-57	33
M_3_F_lqph_Set_6	2.23802	0	0.125	963.884	110.494	1.99599e-25	17
M_3_F_lqph_Set_7	1.6481	0	0.125	872.557	19.1675	1.35379e-05	10
M_3_F_lqph_Set_8	1.66521	0	0.0833333	913.722	60.3325	1.55844e-14	17
M_3_F_lqph_Set_9	2.01858	0	0.125	875.124	21.7338	3.75236e-06	6
M_4_F_lq_Set_1	1.91232	0	0.125	884.885	31.4955	2.84821e-08	4
M_4_F_lq_Set_10	2.16359	0	0.208333	900.549	47.159	1.13053e-11	4
M_4_F_lq_Set_11	2.00209	0	0.166667	868.161	14.7706	0.00012199	6
M_4_F_lq_Set_2	2.00162	0	0.125	869.155	15.7647	7.42127e-05	3
M_4_F_lq_Set_3	1.98258	0	0.125	903.022	49.6321	3.28292e-12	3
M_4_F_lq_Set_4	2.16595	0	0.208333	899.888	46.4982	1.57313e-11	3
M_4_F_lq_Set_5	1.43226	0	0.0833333	913.21	59.8203	2.01337e-14	4
M_4_F_lq_Set_6	2.69376	0	0.125	915.346	61.9563	6.91972e-15	2
M_4_F_lq_Set_7	2.00193	0	0.166667	865.772	12.3821	0.000402701	5
M_4_F_lq_Set_8	1.91244	0	0.125	889.279	35.8895	3.16539e-09	6
M_4_F_lq_Set_9	2.00175	0	0.125	869.066	15.6762	7.75673e-05	3
M_4_F_lp_Set_1	1.95743	0	0.0833333	926.633	73.2435	2.4497e-17	3
M_4_F_lp_Set_10	2.12439	0	0.166667	911.842	58.4521	3.99039e-14	3
M_4_F_lp_Set_11	2.12545	0	0.166667	906.446	53.056	5.92594e-13	5
M_4_F_lp_Set_2	3.1767	0	0.166667	913.873	60.4831	1.44538e-14	2
M_4_F_lp_Set_3	1.56457	0	0.0833333	936.347	82.9571	1.90464e-19	2
M_4_F_lp_Set_4	2.12408	0	0.166667	909.913	56.5233	1.04678e-13	2
M_4_F_lp_Set_5	1.48481	0	0.0833333	937.25	83.8599	1.21276e-19	2
M_4_F_lp_Set_6	2.5085	0	0.125	919.07	65.6803	1.07508e-15	2
M_4_F_lp_Set_7	2.12769	0	0.166667	910.69	57.3001	7.09858e-14	4
M_4_F_lp_Set_8	1.95708	0	0.0833333	910.129	56.7387	9.39891e-14	4
M_4_F_lp_Set_9	2.42965	0	0.166667	916.324	62.9342	4.24367e-15	4
M_4_F_q_Set_1	1.96226	0	0.125	928.794	75.4039	8.31742e-18	2
M_4_F_q_Set_10	NA	NA	0	932.528	79.138	1.28567e-18	3
M_4_F_q_Set_11	2.03896	0	0.125	920.363	66.9732	5.63215e-16	4
M_4_F_q_Set_2	2.38034	0	0.125	921.126	67.7362	3.84592e-16	2
M_4_F_q_Set_3	2.02163	0	0.125	927.631	74.2409	1.48773e-17	2
M_4_F_q_Set_4	NA	NA	0	932.241	78.8515	1.48371e-18	2
M_4_F_q_Set_5	NA	NA	0	936.16	82.77	2.09146e-19	2
M_4_F_q_Set_6	NA	NA	0	937.043	83.6528	1.34508e-19	2
M_4_F_q_Set_7	2.03616	0	0.125	918.102	64.7121	1.74451e-15	3
M_4_F_q_Set_8	1.96212	0	0.125	925.364	71.9742	4.621e-17	3
M_4_F_q_Set_9	2.1375	0	0.125	922.904	69.5138	1.58123e-16	3
M_4_F_qp_Set_1	1.98749	0	0.208333	924.939	71.5488	5.71616e-17	3
M_4_F_qp_Set_10	NA	NA	0	940.331	86.9409	2.59867e-20	4
M_4_F_qp_Set_11	1.98749	0	0.208333	913.944	60.5536	1.39537e-14	7
M_4_F_qp_Set_2	1.91006	0	0.125	916.711	63.3215	3.49654e-15	3
M_4_F_qp_Set_3	1.8903	0	0.125	933.381	79.9914	8.39123e-19	2
M_4_F_qp_Set_4	NA	NA	0	941.327	87.9366	1.57954e-20	3
M_4_F_qp_Set_5	NA	NA	0	943.854	90.4643	4.46328e-21	1
M_4_F_qp_Set_6	NA	NA	0	938.837	85.447	5.48478e-20	2
M_4_F_qp_Set_7	1.98749	0	0.208333	911.334	57.9442	5.14403e-14	6
M_4_F_qp_Set_8	1.98749	0	0.208333	925.845	72.4549	3.63365e-17	4
M_4_F_qp_Set_9	1.89026	0	0.125	917.212	63.8216	2.72302e-15	4
M_4_F_lqp_Set_1	1.84084	0	0.0833333	891.866	38.4764	8.68332e-10	5
M_4_F_lqp_Set_10	2.12468	0	0.166667	910.176	56.7856	9.18085e-14	4
M_4_F_lqp_Set_11	2.42016	0	0.166667	872.692	19.3019	1.26584e-05	5
M_4_F_lqp_Set_2	2.85884	0	0.166667	880.947	27.5571	2.04071e-07	4
M_4_F_lqp_Set_3	1.89417	0	0.125	914.06	60.67	1.31648e-14	3
M_4_F_lqp_Set_4	2.12419	0	0.166667	908.05	54.6596	2.658e-13	3
M_4_F_lqp_Set_5	1.48621	0	0.0833333	923.132	69.7422	1.41061e-16	3
M_4_F_lqp_Set_6	2.5085	0	0.125	919.07	65.6803	1.07508e-15	2
M_4_F_lqp_Set_7	2.42979	0	0.166667	872.758	19.3683	1.22451e-05	5
M_4_F_lqp_Set_8	1.84087	0	0.0833333	892.062	38.6724	7.87284e-10	6
M_4_F_lqp_Set_9	2.83483	0	0.166667	880.893	27.5026	2.0971e-07	4
M_4_F_lqpt_Set_1	1.64743	0	0.125	888.543	35.1526	4.57539e-09	6
M_4_F_lqpt_Set_10	2.1254	0	0.166667	908.378	54.988	2.25546e-13	5
M_4_F_lqpt_Set_11	2.39325	0	0.166667	876.541	23.1514	1.84702e-06	7
M_4_F_lqpt_Set_2	2.35674	0	0.125	883.268	29.8783	6.39355e-08	5
M_4_F_lqpt_Set_3	1.48801	0	0.208333	914.491	61.1007	1.0614e-14	4
M_4_F_lqpt_Set_4	2.12526	0	0.166667	905.955	52.5655	7.57297e-13	4
M_4_F_lqpt_Set_5	1.27358	0	0.0833333	924.611	71.2211	6.73386e-17	5
M_4_F_lqpt_Set_6	2.5085	0	0.125	919.07	65.6803	1.07508e-15	2
M_4_F_lqpt_Set_7	2.38515	0	0.166667	876.607	23.2169	1.78749e-06	7
M_4_F_lqpt_Set_8	1.67057	0	0.125	890.188	36.7978	2.00993e-09	7
M_4_F_lqpt_Set_9	2.35375	0	0.125	883.211	29.8212	6.57859e-08	5
M_4_F_lqpth_Set_1	1.66637	0	0.0833333	886.271	32.8811	1.42456e-08	7
M_4_F_lqpth_Set_10	1.93292	0	0.166667	927.027	73.6373	2.01186e-17	13
M_4_F_lqpth_Set_11	1.71862	0	0.125	873.041	19.6514	1.06286e-05	8
M_4_F_lqpth_Set_2	2.0408	0	0.125	879.92	26.5302	3.4101e-07	6
M_4_F_lqpth_Set_3	1.95757	0	0.0833333	913.025	59.6348	2.20897e-14	5
M_4_F_lqpth_Set_4	1.93487	0	0.166667	908.407	55.0174	2.22251e-13	7
M_4_F_lqpth_Set_5	1.3426	0	0.0833333	967.392	114.002	3.45586e-26	19
M_4_F_lqpth_Set_6	2.18956	0	0.125	938.476	85.0856	6.57084e-20	10
M_4_F_lqpth_Set_7	1.72349	0	0.125	873.09	19.7	1.03737e-05	8
M_4_F_lqpth_Set_8	1.67731	0	0.0833333	900.35	46.9605	1.24852e-11	12
M_4_F_lqpth_Set_9	2.04054	0	0.125	879.877	26.4867	3.48514e-07	6
M_4_F_lqph_Set_1	1.67187	0	0.0833333	889.165	35.7755	3.35101e-09	8
M_4_F_lqph_Set_10	1.93457	0	0.166667	927.027	73.6373	2.01186e-17	13
M_4_F_lqph_Set_11	1.71134	0	0.125	873.037	19.6466	1.06542e-05	8
M_4_F_lqph_Set_2	2.03959	0	0.125	879.89	26.5005	3.46114e-07	6
M_4_F_lqph_Set_3	1.95757	0	0.0833333	910.54	57.1505	7.64984e-14	4
M_4_F_lqph_Set_4	1.93316	0	0.166667	908.407	55.0174	2.22251e-13	7
M_4_F_lqph_Set_5	1.34462	0	0.0833333	967.392	114.002	3.45586e-26	19
M_4_F_lqph_Set_6	2.18968	0	0.125	938.476	85.0856	6.57084e-20	10
M_4_F_lqph_Set_7	1.70846	0	0.125	873.085	19.6949	1.04001e-05	8
M_4_F_lqph_Set_8	1.67275	0	0.0833333	907.956	54.5662	2.78499e-13	14
M_4_F_lqph_Set_9	2.04145	0	0.125	879.847	26.4571	3.53713e-07	6
M_5_F_lq_Set_1	1.90266	0	0.125	887.271	33.8809	8.64129e-09	4
M_5_F_lq_Set_10	2.13813	0	0.208333	902.275	48.8853	4.76893e-12	4
M_5_F_lq_Set_11	2.00214	0	0.166667	865.393	12.0035	0.000486627	4
M_5_F_lq_Set_2	2.00281	0	0.125	871.08	17.6901	2.83383e-05	3
M_5_F_lq_Set_3	1.97921	0	0.125	904.956	51.5665	1.24799e-12	3
M_5_F_lq_Set_4	2.13886	0	0.208333	901.393	48.0029	7.41347e-12	3
M_5_F_lq_Set_5	1.47197	0	0.0833333	915.27	61.88	7.18884e-15	4
M_5_F_lq_Set_6	2.60519	0	0.125	915.914	62.5242	5.20931e-15	2
M_5_F_lq_Set_7	2.00196	0	0.166667	865.499	12.1089	0.000461653	4
M_5_F_lq_Set_8	1.90713	0	0.125	889.425	36.0348	2.94355e-09	5
M_5_F_lq_Set_9	2.00292	0	0.125	870.998	17.6079	2.95277e-05	3
M_5_F_lp_Set_1	1.73628	0	0.0833333	927.917	74.5267	1.28964e-17	3
M_5_F_lp_Set_10	2.15976	0	0.166667	912.069	58.6789	3.56268e-14	2
M_5_F_lp_Set_11	2.18683	0	0.166667	912.203	58.8128	3.33184e-14	5
M_5_F_lp_Set_2	6.34216	0	0.166667	915.59	62.2004	6.1247e-15	2
M_5_F_lp_Set_3	1.56005	0	0.0833333	939.5	86.1104	3.93631e-20	2
M_5_F_lp_Set_4	2.17558	0	0.166667	912.108	58.7179	3.49376e-14	2
M_5_F_lp_Set_5	1.57383	0	0.0833333	940.189	86.7988	2.79003e-20	2
M_5_F_lp_Set_6	2.75787	0	0.125	918.775	65.3849	1.24619e-15	1
M_5_F_lp_Set_7	2.18798	0	0.166667	912.861	59.4715	2.39693e-14	4
M_5_F_lp_Set_8	1.73658	0	0.0833333	916.695	63.3051	3.52527e-15	4
M_5_F_lp_Set_9	2.76898	0	0.166667	917.626	64.2363	2.21303e-15	3
M_5_F_q_Set_1	1.95334	0	0.125	929.746	76.3559	5.16725e-18	2
M_5_F_q_Set_10	NA	NA	0	933.709	80.3188	7.12393e-19	3
M_5_F_q_Set_11	1.95464	0	0.125	921.82	68.4301	2.71845e-16	4
M_5_F_q_Set_2	2.09494	0	0.125	922.216	68.8261	2.23011e-16	2
M_5_F_q_Set_3	2.00837	0	0.125	928.496	75.1059	9.65379e-18	2
M_5_F_q_Set_4	NA	NA	0	933.351	79.9614	8.51768e-19	2
M_5_F_q_Set_5	NA	NA	0	937.234	83.8444	1.22223e-19	2
M_5_F_q_Set_6	NA	NA	0	937.613	84.2234	1.01121e-19	2
M_5_F_q_Set_7	1.95365	0	0.125	919.57	66.1804	8.37205e-16	3
M_5_F_q_Set_8	1.95368	0	0.125	926.583	73.1929	2.51241e-17	3
M_5_F_q_Set_9	2.01052	0	0.125	923.96	70.5703	9.32362e-17	3
M_5_F_qp_Set_1	1.96745	0	0.25	927.628	74.2384	1.48962e-17	2
M_5_F_qp_Set_10	NA	NA	0	941.816	88.4257	1.23688e-20	2
M_5_F_qp_Set_11	1.96757	0	0.25	915.315	61.9249	7.02938e-15	4
M_5_F_qp_Set_2	NA	NA	0	924.204	70.8143	8.25295e-17	3
M_5_F_qp_Set_3	NA	NA	0	938.535	85.1447	6.37964e-20	2
M_5_F_qp_Set_4	NA	NA	0	947.165	93.7746	8.52757e-22	3
M_5_F_qp_Set_5	NA	NA	0	946.913	93.5235	9.66839e-22	1
M_5_F_qp_Set_6	NA	NA	0	944.002	90.6124	4.14465e-21	2
M_5_F_qp_Set_7	1.96757	0	0.25	915.324	61.9342	6.99652e-15	4
M_5_F_qp_Set_8	1.96745	0	0.25	927.621	74.2306	1.49543e-17	2
M_5_F_qp_Set_9	NA	NA	0	924.196	70.8065	8.28502e-17	3
M_5_F_lqp_Set_1	1.7365	0	0.0833333	900.996	47.6065	9.03881e-12	5
M_5_F_lqp_Set_10	2.15969	0	0.166667	913.02	59.6302	2.2141e-14	3
M_5_F_lqp_Set_11	2.18703	0	0.166667	880.45	27.0601	2.61633e-07	5
M_5_F_lqp_Set_2	6.30433	0	0.166667	888.368	34.9784	4.99197e-09	4
M_5_F_lqp_Set_3	1.56005	0	0.0833333	917.414	64.0239	2.46106e-15	2
M_5_F_lqp_Set_4	2.17577	0	0.166667	913.059	59.6687	2.17183e-14	3
M_5_F_lqp_Set_5	1.5506	0	0.0833333	930.962	77.5724	2.81249e-18	3
M_5_F_lqp_Set_6	2.75787	0	0.125	918.775	65.3849	1.24619e-15	1
M_5_F_lqp_Set_7	2.18646	0	0.166667	880.504	27.1145	2.54623e-07	5
M_5_F_lqp_Set_8	1.73656	0	0.0833333	903.584	50.1945	2.47821e-12	6
M_5_F_lqp_Set_9	2.77119	0	0.166667	888.319	34.9291	5.11643e-09	4
M_5_F_lqpt_Set_1	1.72325	0	0.166667	898.746	45.3565	2.78416e-11	6
M_5_F_lqpt_Set_10	2.15199	0	0.166667	912.181	58.7914	3.36781e-14	4
M_5_F_lqpt_Set_11	2.16755	0	0.166667	882.627	29.237	8.81032e-08	6
M_5_F_lqpt_Set_2	3.54854	0	0.166667	888.268	34.8782	5.24847e-09	4
M_5_F_lqpt_Set_3	1.2785	0	0.0833333	914.826	61.4365	8.97334e-15	2
M_5_F_lqpt_Set_4	2.15041	0	0.166667	912.218	58.8278	3.30693e-14	4
M_5_F_lqpt_Set_5	1.27358	0	0.0833333	933.013	79.6231	1.00878e-18	5
M_5_F_lqpt_Set_6	2.75787	0	0.125	918.775	65.3849	1.24619e-15	1
M_5_F_lqpt_Set_7	2.16278	0	0.166667	882.683	29.2928	8.56788e-08	6
M_5_F_lqpt_Set_8	1.73374	0	0.166667	898.733	45.3435	2.80233e-11	6
M_5_F_lqpt_Set_9	2.36153	0	0.166667	888.221	34.8309	5.37401e-09	4
M_5_F_lqpth_Set_1	1.49781	0	0.0833333	888.943	35.5527	3.74587e-09	6
M_5_F_lqpth_Set_10	1.92598	0	0.166667	905.397	52.0073	1.0011e-12	5
M_5_F_lqpth_Set_11	1.73433	0	0.125	879.416	26.0258	4.3884e-07	8
M_5_F_lqpth_Set_2	2.35599	0	0.166667	882.238	28.8481	1.07016e-07	5
M_5_F_lqpth_Set_3	1.4423	0	0.0833333	913.835	60.4453	1.473e-14	4
M_5_F_lqpth_Set_4	1.92371	0	0.166667	905.431	52.0413	9.84263e-13	5
M_5_F_lqpth_Set_5	1.39031	0	0.0833333	967.137	113.747	3.92463e-26	18
M_5_F_lqpth_Set_6	2.12492	0	0.125	929.989	76.5989	4.57593e-18	6
M_5_F_lqpth_Set_7	1.71952	0	0.125	879.457	26.0671	4.29864e-07	8
M_5_F_lqpth_Set_8	1.51418	0	0.0833333	886.327	32.9366	1.38558e-08	5
M_5_F_lqpth_Set_9	2.33357	0	0.166667	882.201	28.811	1.09016e-07	5
M_5_F_lqph_Set_1	1.51306	0	0.0833333	891.666	38.2765	9.59589e-10	7
M_5_F_lqph_Set_10	1.92422	0	0.166667	905.397	52.0073	1.0011e-12	5
M_5_F_lqph_Set_11	1.73538	0	0.125	879.421	26.0307	4.37756e-07	8
M_5_F_lqph_Set_2	2.34281	0	0.166667	884.794	31.4036	2.98217e-08	6
M_5_F_lqph_Set_3	1.4423	0	0.0833333	921.633	68.2432	2.98467e-16	7
M_5_F_lqph_Set_4	1.92548	0	0.166667	905.431	52.0413	9.84263e-13	5
M_5_F_lqph_Set_5	1.39097	0	0.0833333	967.137	113.747	3.92463e-26	18
M_5_F_lqph_Set_6	2.12492	0	0.125	929.989	76.5989	4.57593e-18	6
M_5_F_lqph_Set_7	1.73347	0	0.125	879.462	26.0721	4.28782e-07	8
M_5_F_lqph_Set_8	1.51009	0	0.0833333	891.653	38.2629	9.66139e-10	7
M_5_F_lqph_Set_9	2.32147	0	0.166667	884.756	31.3665	3.03802e-08	6
M_6_F_lq_Set_1	1.90245	0	0.125	889.987	36.5967	2.22254e-09	4
M_6_F_lq_Set_10	2.13675	0	0.208333	904.259	50.8691	1.76867e-12	4
M_6_F_lq_Set_11	2.00201	0	0.166667	867.631	14.2407	0.000159	4
M_6_F_lq_Set_2	2.00167	0	0.125	873.261	19.8708	9.52427e-06	3
M_6_F_lq_Set_3	1.97045	0	0.166667	907.187	53.7973	4.09071e-13	3
M_6_F_lq_Set_4	2.13708	0	0.208333	903.098	49.7082	3.16037e-12	3
M_6_F_lq_Set_5	1.47599	0	0.0833333	917.714	64.3237	2.11846e-15	4
M_6_F_lq_Set_6	2.56444	0	0.125	916.627	63.2367	3.64804e-15	2
M_6_F_lq_Set_7	2.00174	0	0.166667	867.727	14.3371	0.000151521	4
M_6_F_lq_Set_8	1.90248	0	0.125	889.97	36.5803	2.24088e-09	4
M_6_F_lq_Set_9	2.0018	0	0.125	873.185	19.7948	9.89315e-06	3
M_6_F_lp_Set_1	NA	NA	0	929.584	76.1941	5.60255e-18	3
M_6_F_lp_Set_10	2.86423	0	0.125	914.819	61.4291	9.00671e-15	2
M_6_F_lp_Set_11	2.86476	0	0.125	915.603	62.2134	6.08486e-15	4
M_6_F_lp_Set_2	40.2321	0	0.125	917.761	64.3706	2.06936e-15	2
M_6_F_lp_Set_3	NA	NA	0	938.828	85.4377	5.51019e-20	1
M_6_F_lp_Set_4	2.86397	0	0.125	914.851	61.4614	8.86263e-15	2
M_6_F_lp_Set_5	NA	NA	0	939.012	85.6219	5.02547e-20	1
M_6_F_lp_Set_6	4.37365	0	0.125	920.768	67.3776	4.60119e-16	1
M_6_F_lp_Set_7	2.8645	0	0.125	915.628	62.2385	6.00904e-15	4
M_6_F_lp_Set_8	NA	NA	0	925.199	71.8091	5.0186e-17	4
M_6_F_lp_Set_9	4.37688	0	0.125	917.738	64.3477	2.09312e-15	2
M_6_F_q_Set_1	1.94022	0	0.125	930.869	77.479	2.947e-18	2
M_6_F_q_Set_10	NA	NA	0	935.188	81.7984	3.39961e-19	3
M_6_F_q_Set_11	1.94073	0	0.125	923.627	70.2371	1.1014e-16	4
M_6_F_q_Set_2	2.02603	0	0.125	923.586	70.196	1.12426e-16	2
M_6_F_q_Set_3	1.98952	0	0.125	929.578	76.1877	5.62058e-18	2
M_6_F_q_Set_4	NA	NA	0	934.698	81.3078	4.34483e-19	2
M_6_F_q_Set_5	NA	NA	0	938.53	85.1399	6.39504e-20	2
M_6_F_q_Set_6	NA	NA	0	938.384	84.9937	6.87992e-20	2
M_6_F_q_Set_7	1.94033	0	0.125	921.399	68.0088	3.3559e-16	3
M_6_F_q_Set_8	1.93949	0	0.125	928.093	74.7026	1.18102e-17	3
M_6_F_q_Set_9	1.98978	0	0.125	925.302	71.9124	4.76591e-17	3
M_6_F_qp_Set_1	NA	NA	0	931.559	78.1691	2.08704e-18	2
M_6_F_qp_Set_10	NA	NA	0	945.525	92.1346	1.93621e-21	1
M_6_F_qp_Set_11	NA	NA	0	924.349	70.9595	7.67497e-17	4
M_6_F_qp_Set_2	NA	NA	0	928.895	75.5046	7.9087e-18	2
M_6_F_qp_Set_3	NA	NA	0	939.126	85.7358	4.74713e-20	1
M_6_F_qp_Set_4	NA	NA	0	945.532	92.142	1.92908e-21	1
M_6_F_qp_Set_5	NA	NA	0	944.979	91.589	2.54353e-21	0
M_6_F_qp_Set_6	NA	NA	0	944.979	91.589	2.54353e-21	0
M_6_F_qp_Set_7	NA	NA	0	924.357	70.9674	7.64449e-17	4
M_6_F_qp_Set_8	NA	NA	0	931.552	78.1617	2.09478e-18	2
M_6_F_qp_Set_9	NA	NA	0	928.887	75.4972	7.93821e-18	2
M_6_F_lqp_Set_1	NA	NA	0	910.988	57.5977	6.11707e-14	5
M_6_F_lqp_Set_10	2.86423	0	0.125	914.819	61.4291	9.00671e-15	2
M_6_F_lqp_Set_11	2.86476	0	0.125	889.007	35.6171	3.62728e-09	5
M_6_F_lqp_Set_2	40.0425	0	0.125	893.36	39.9696	4.11568e-10	3
M_6_F_lqp_Set_3	NA	NA	0	922.539	69.1486	1.89806e-16	2
M_6_F_lqp_Set_4	2.86397	0	0.125	914.851	61.4614	8.86263e-15	2
M_6_F_lqp_Set_5	NA	NA	0	935.204	81.8145	3.37231e-19	2
M_6_F_lqp_Set_6	4.37365	0	0.125	920.768	67.3776	4.60119e-16	1
M_6_F_lqp_Set_7	2.8645	0	0.125	889.051	35.6606	3.54916e-09	5
M_6_F_lqp_Set_8	NA	NA	0	910.977	57.5874	6.14856e-14	5
M_6_F_lqp_Set_9	4.37688	0	0.125	893.32	39.9304	4.19708e-10	3
M_6_F_lqpt_Set_1	NA	NA	0	905.676	52.286	8.70891e-13	5
M_6_F_lqpt_Set_10	2.86423	0	0.125	915.992	62.6019	5.01063e-15	3
M_6_F_lqpt_Set_11	2.86476	0	0.125	891.156	37.766	1.23866e-09	6
M_6_F_lqpt_Set_2	42.0226	0	0.125	895.609	42.2193	1.33636e-10	4
M_6_F_lqpt_Set_3	NA	NA	0	919.322	65.9316	9.48111e-16	2
M_6_F_lqpt_Set_4	2.86397	0	0.125	916.024	62.6336	4.93196e-15	3
M_6_F_lqpt_Set_5	NA	NA	0	935.319	81.9292	3.18444e-19	3
M_6_F_lqpt_Set_6	4.37564	0	0.125	920.768	67.3776	4.60119e-16	1
M_6_F_lqpt_Set_7	2.8645	0	0.125	891.201	37.8105	1.21136e-09	6
M_6_F_lqpt_Set_8	NA	NA	0	905.664	52.2742	8.76073e-13	5
M_6_F_lqpt_Set_9	4.37688	0	0.125	895.568	42.1782	1.36411e-10	4
M_6_F_lqpth_Set_1	1.5237	0	0.0833333	894.389	40.9987	2.46026e-10	6
M_6_F_lqpth_Set_10	1.91395	0	0.166667	908.134	54.7438	2.54842e-13	5
M_6_F_lqpth_Set_11	1.66526	0	0.125	883.291	29.9012	6.32084e-08	7
M_6_F_lqpth_Set_2	2.14351	0	0.125	893.17	39.7803	4.52428e-10	7
M_6_F_lqpth_Set_3	1.44963	0	0.0833333	917.415	64.0253	2.45926e-15	4
M_6_F_lqpth_Set_4	1.91356	0	0.166667	908.163	54.7731	2.51136e-13	5
M_6_F_lqpth_Set_5	1.33429	0	0.0833333	921.094	67.704	3.90842e-16	3
M_6_F_lqpth_Set_6	2.05357	0	0.125	920.768	67.3776	4.60119e-16	1
M_6_F_lqpth_Set_7	1.6628	0	0.125	883.323	29.9329	6.2214e-08	7
M_6_F_lqpth_Set_8	1.52829	0	0.0833333	894.376	40.9858	2.47608e-10	6
M_6_F_lqpth_Set_9	2.1201	0	0.125	893.14	39.7497	4.59395e-10	7
M_6_F_lqph_Set_1	1.52699	0	0.0833333	894.361	40.9706	2.49507e-10	6
M_6_F_lqph_Set_10	1.91383	0	0.166667	908.134	54.7438	2.54842e-13	5
M_6_F_lqph_Set_11	1.66978	0	0.125	883.252	29.8618	6.44652e-08	7
M_6_F_lqph_Set_2	2.14633	0	0.125	890.572	37.182	1.65865e-09	6
M_6_F_lqph_Set_3	1.44963	0	0.0833333	917.396	64.0059	2.48327e-15	4
M_6_F_lqph_Set_4	1.9134	0	0.166667	908.163	54.7731	2.51136e-13	5
M_6_F_lqph_Set_5	1.33193	0	0.0833333	921.094	67.704	3.90842e-16	3
M_6_F_lqph_Set_6	2.05357	0	0.125	920.768	67.3776	4.60119e-16	1
M_6_F_lqph_Set_7	1.66817	0	0.125	883.286	29.8963	6.33613e-08	7
M_6_F_lqph_Set_8	1.5434	0	0.0833333	894.348	40.9578	2.51108e-10	6
M_6_F_lqph_Set_9	2.11513	0	0.125	890.542	37.1516	1.68406e-09	6

## Sheet: 50km-PC_5
Model	Mean_AUC_ratio	pval_pROC	Omission_rate_at_5%	AICc	delta_AICc	W_AICc	N_parameters
M_0.1_F_lq_Set_1	1.71831	0	0.125	879.831	26.4415	3.56469e-07	4
M_0.1_F_lq_Set_10	2.08567	0	0.0416667	900.988	47.5979	9.07784e-12	6
M_0.1_F_lq_Set_11	2.04168	0	0.0833333	864.963	11.5732	0.000603448	8
M_0.1_F_lq_Set_2	2.10236	0	0.0833333	865.878	12.4885	0.000381849	4
M_0.1_F_lq_Set_3	2.02195	0	0.166667	901.294	47.9039	7.78999e-12	4
M_0.1_F_lq_Set_4	2.1662	0	0.0416667	898.784	45.3939	2.73261e-11	4
M_0.1_F_lq_Set_5	1.60927	0	0.166667	909.09	55.6998	1.58001e-13	4
M_0.1_F_lq_Set_6	3.7808	0	0.0416667	918.477	65.0875	1.44594e-15	4
M_0.1_F_lq_Set_7	2.04916	0	0.0833333	862.391	9.00077	0.00218392	6
M_0.1_F_lq_Set_8	1.7463	0	0.125	883.627	30.2375	5.34254e-08	6
M_0.1_F_lq_Set_9	2.07526	0	0.0833333	868.326	14.9365	0.000112284	6
M_0.1_F_lp_Set_1	1.94723	0	0.125	924.445	71.0554	7.31564e-17	3
M_0.1_F_lp_Set_10	2.14197	0	0.125	906.794	53.4043	4.97894e-13	6
M_0.1_F_lp_Set_11	2.71228	0	0.208333	899.818	46.4276	1.62969e-11	10
M_0.1_F_lp_Set_2	3.37693	0	0.0416667	911.322	57.9317	5.17634e-14	3
M_0.1_F_lp_Set_3	1.99948	0	0.25	927.456	74.0659	1.62377e-17	3
M_0.1_F_lp_Set_4	2.34278	0	0.0833333	908.169	54.7786	2.50447e-13	3
M_0.1_F_lp_Set_5	1.7286	0	0.125	923.459	70.0694	1.19772e-16	3
M_0.1_F_lp_Set_6	4.07611	0	0.0833333	916.573	63.1834	3.74643e-15	3
M_0.1_F_lp_Set_7	2.83516	0	0.0416667	906.23	52.8401	6.60158e-13	6
M_0.1_F_lp_Set_8	2.17447	0	0.125	901.37	47.9798	7.49985e-12	6
M_0.1_F_lp_Set_9	3.19011	0	0.25	914.988	61.5984	8.2756e-15	6
M_0.1_F_q_Set_1	2.04663	0	0.0833333	926.973	73.5831	2.06715e-17	2
M_0.1_F_q_Set_10	2.0386	0	0.125	930.392	77.002	3.74068e-18	3
M_0.1_F_q_Set_11	2.19656	0	0.0833333	917.727	64.3374	2.104e-15	4
M_0.1_F_q_Set_2	54.7876	0	0.125	919.245	65.8548	9.85214e-16	2
M_0.1_F_q_Set_3	2.28912	0	0.0833333	926.082	72.6919	3.22767e-17	2
M_0.1_F_q_Set_4	2.04897	0	0.0833333	930.121	76.7309	4.28372e-18	2
M_0.1_F_q_Set_5	2.03169	0	0.166667	934.155	80.7649	5.69966e-19	2
M_0.1_F_q_Set_6	19.3764	0	0.0416667	936.099	82.7091	2.15619e-19	2
M_0.1_F_q_Set_7	2.21482	0	0.0833333	915.526	62.1361	6.32481e-15	3
M_0.1_F_q_Set_8	2.04082	0	0.125	923.171	69.7806	1.3838e-16	3
M_0.1_F_q_Set_9	2.70873	0	0.125	921.019	67.6294	4.05686e-16	3
M_0.1_F_qp_Set_1	2.26338	0	0.125	908.116	54.7263	2.57083e-13	3
M_0.1_F_qp_Set_10	2.06477	0	0.166667	925.842	72.4523	3.6384e-17	6
M_0.1_F_qp_Set_11	2.1872	0	0.0833333	883.619	30.2289	5.36533e-08	9
M_0.1_F_qp_Set_2	2.00246	0	0.0416667	904.107	50.717	1.90837e-12	3
M_0.1_F_qp_Set_3	2.01187	0	0.0833333	926.604	73.2141	2.48596e-17	3
M_0.1_F_qp_Set_4	2.03787	0	0.0416667	932.075	78.685	1.61248e-18	3
M_0.1_F_qp_Set_5	2.02673	0	0.125	935.475	82.0846	2.94629e-19	3
M_0.1_F_qp_Set_6	34.5009	0	0.0416667	935.726	82.3365	2.59765e-19	3
M_0.1_F_qp_Set_7	1.99831	0	0	886.474	33.0841	1.28707e-08	6
M_0.1_F_qp_Set_8	2.49692	0	0.125	907.721	54.331	3.13259e-13	6
M_0.1_F_qp_Set_9	2.00788	0	0.0416667	899.613	46.2227	1.80551e-11	5
M_0.1_F_lqp_Set_1	2.10604	0	0.0833333	865.308	11.9177	0.000507975	5
M_0.1_F_lqp_Set_10	1.83911	0	0.208333	887.836	34.4465	6.5127e-09	9
M_0.1_F_lqp_Set_11	1.96828	0	0.0833333	859.675	6.28494	0.00849125	13
M_0.1_F_lqp_Set_2	2.03272	0	0.0416667	864.78	11.3904	0.000661202	5
M_0.1_F_lqp_Set_3	1.81667	0	0.125	895.898	42.5076	1.15699e-10	4
M_0.1_F_lqp_Set_4	2.18819	0	0.0416667	901.259	47.8693	7.92574e-12	5
M_0.1_F_lqp_Set_5	1.73152	0	0.125	892.792	39.402	5.46619e-10	5
M_0.1_F_lqp_Set_6	3.62965	0	0.166667	920.899	67.5091	4.30834e-16	5
M_0.1_F_lqp_Set_7	2.24488	0	0.0833333	854.871	1.48119	0.093776	9
M_0.1_F_lqp_Set_8	2.13098	0	0.166667	861.161	7.77117	0.00403869	9
M_0.1_F_lqp_Set_9	2.12812	0	0.0416667	869.879	16.4895	5.1652e-05	8
M_0.1_F_lqpt_Set_1	3.78138	0	0.916667	NA	NA	NA	69
M_0.1_F_lqpt_Set_10	2.3529	0	1	NA	NA	NA	82
M_0.1_F_lqpt_Set_11	2.11225	0	1	NA	NA	NA	105
M_0.1_F_lqpt_Set_2	3.44999	0	0.833333	NA	NA	NA	71
M_0.1_F_lqpt_Set_3	1.9905	0	0.916667	NA	NA	NA	72
M_0.1_F_lqpt_Set_4	3.11726	0	0.958333	NA	NA	NA	64
M_0.1_F_lqpt_Set_5	2.95405	0	1	NA	NA	NA	72
M_0.1_F_lqpt_Set_6	4.71249	0	0.916667	NA	NA	NA	62
M_0.1_F_lqpt_Set_7	4.30049	0	1	NA	NA	NA	93
M_0.1_F_lqpt_Set_8	3.11733	0	1	NA	NA	NA	93
M_0.1_F_lqpt_Set_9	2.55525	0	0.958333	NA	NA	NA	90
M_0.1_F_lqpth_Set_1	2.70456	0	0.916667	NA	NA	NA	77
M_0.1_F_lqpth_Set_10	2.97697	0	1	NA	NA	NA	91
M_0.1_F_lqpth_Set_11	3.31838	0	1	NA	NA	NA	114
M_0.1_F_lqpth_Set_2	1.98696	0	0.875	NA	NA	NA	78
M_0.1_F_lqpth_Set_3	1.70561	0	0.833333	NA	NA	NA	78
M_0.1_F_lqpth_Set_4	2.17715	0	0.916667	NA	NA	NA	73
M_0.1_F_lqpth_Set_5	2.25629	0	1	NA	NA	NA	72
M_0.1_F_lqpth_Set_6	2.63945	0	1	NA	NA	NA	71
M_0.1_F_lqpth_Set_7	3.20128	0	1	NA	NA	NA	110
M_0.1_F_lqpth_Set_8	2.4206	0	1	NA	NA	NA	104
M_0.1_F_lqpth_Set_9	2.16683	0	1	NA	NA	NA	96
M_0.1_F_lqph_Set_1	2.09885	0	0.166667	NA	NA	NA	90
M_0.1_F_lqph_Set_10	1.975	0	0.458333	NA	NA	NA	117
M_0.1_F_lqph_Set_11	2.58264	0	0.416667	NA	NA	NA	151
M_0.1_F_lqph_Set_2	1.8336	0	0.0833333	NA	NA	NA	95
M_0.1_F_lqph_Set_3	1.65301	0	0.25	NA	NA	NA	116
M_0.1_F_lqph_Set_4	1.95055	0	0.208333	NA	NA	NA	119
M_0.1_F_lqph_Set_5	1.94236	0	0.333333	NA	NA	NA	142
M_0.1_F_lqph_Set_6	3.75283	0	0.375	NA	NA	NA	136
M_0.1_F_lqph_Set_7	2.45823	0	0.25	NA	NA	NA	116
M_0.1_F_lqph_Set_8	1.945	0	0.291667	NA	NA	NA	116
M_0.1_F_lqph_Set_9	2.25371	0	0.416667	NA	NA	NA	142
M_0.25_F_lq_Set_1	2.03059	0	0.125	879.854	26.464	3.52489e-07	4
M_0.25_F_lq_Set_10	2.09091	0	0.0416667	901.025	47.6346	8.91264e-12	6
M_0.25_F_lq_Set_11	2.03476	0	0.0833333	865.009	11.6188	0.000589857	8
M_0.25_F_lq_Set_2	2.07315	0	0.0833333	865.922	12.5321	0.000373613	4
M_0.25_F_lq_Set_3	2.01338	0	0.166667	898.939	45.5487	2.52909e-11	3
M_0.25_F_lq_Set_4	2.16141	0	0.0416667	898.809	45.4189	2.69867e-11	4
M_0.25_F_lq_Set_5	1.65133	0	0.166667	909.108	55.7181	1.56565e-13	4
M_0.25_F_lq_Set_6	4.00314	0	0.0416667	918.495	65.1051	1.43332e-15	4
M_0.25_F_lq_Set_7	2.0417	0	0.0833333	862.436	9.04654	0.00213451	6
M_0.25_F_lq_Set_8	1.718	0	0.125	883.653	30.263	5.27481e-08	6
M_0.25_F_lq_Set_9	2.07382	0	0.0833333	868.367	14.9772	0.000110022	6
M_0.25_F_lp_Set_1	1.9512	0	0.125	924.46	71.0703	7.26127e-17	3
M_0.25_F_lp_Set_10	2.14156	0	0.125	904.29	50.9002	1.74141e-12	5
M_0.25_F_lp_Set_11	2.56583	0	0.25	900.291	46.9006	1.28647e-11	10
M_0.25_F_lp_Set_2	3.27171	0	0.0416667	911.379	57.9888	5.03055e-14	3
M_0.25_F_lp_Set_3	1.99974	0	0.208333	927.52	74.1299	1.57259e-17	3
M_0.25_F_lp_Set_4	2.32388	0	0.0833333	908.224	54.8338	2.4363e-13	3
M_0.25_F_lp_Set_5	1.7932	0	0.125	923.52	70.1296	1.16218e-16	3
M_0.25_F_lp_Set_6	4.06569	0	0.0416667	914.373	60.9828	1.12585e-14	2
M_0.25_F_lp_Set_7	2.72717	0	0.0416667	906.321	52.9311	6.30795e-13	6
M_0.25_F_lp_Set_8	2.00793	0	0.125	901.495	48.1049	7.04516e-12	6
M_0.25_F_lp_Set_9	3.10309	0	0.208333	915.051	61.6611	8.0205e-15	6
M_0.25_F_q_Set_1	2.03845	0	0.0833333	926.98	73.5897	2.06031e-17	2
M_0.25_F_q_Set_10	2.04047	0	0.166667	930.404	77.0136	3.71916e-18	3
M_0.25_F_q_Set_11	2.1598	0	0.0833333	917.738	64.3485	2.09236e-15	4
M_0.25_F_q_Set_2	52.3085	0	0.125	919.251	65.8609	9.82222e-16	2
M_0.25_F_q_Set_3	2.28192	0	0.0833333	926.091	72.7006	3.2136e-17	2
M_0.25_F_q_Set_4	2.04432	0	0.0833333	930.132	76.7421	4.25981e-18	2
M_0.25_F_q_Set_5	2.02571	0	0.166667	934.164	80.774	5.67371e-19	2
M_0.25_F_q_Set_6	19.701	0	0.0416667	936.107	82.7175	2.14712e-19	2
M_0.25_F_q_Set_7	2.16942	0	0.0833333	915.534	62.1444	6.29849e-15	3
M_0.25_F_q_Set_8	2.04205	0	0.125	923.181	69.7906	1.3769e-16	3
M_0.25_F_q_Set_9	2.68345	0	0.125	921.031	67.6408	4.03384e-16	3
M_0.25_F_qp_Set_1	1.99967	0	0.125	908.363	54.9732	2.27226e-13	3
M_0.25_F_qp_Set_10	2.0326	0	0.166667	926.2	72.8105	3.04182e-17	6
M_0.25_F_qp_Set_11	2.0261	0	0.0833333	881.462	28.0718	1.57767e-07	8
M_0.25_F_qp_Set_2	2.00215	0	0.0416667	904.161	50.7711	1.85751e-12	3
M_0.25_F_qp_Set_3	2.00925	0	0.0833333	926.643	73.2526	2.43848e-17	3
M_0.25_F_qp_Set_4	2.03379	0	0.0416667	932.118	78.7282	1.57804e-18	3
M_0.25_F_qp_Set_5	2.02649	0	0.125	935.522	82.1325	2.87663e-19	3
M_0.25_F_qp_Set_6	35.2028	0	0.0416667	935.753	82.363	2.56349e-19	3
M_0.25_F_qp_Set_7	1.99741	0	0	884.32	30.9303	3.77825e-08	5
M_0.25_F_qp_Set_8	2.3508	0	0.125	908.005	54.6149	2.71808e-13	6
M_0.25_F_qp_Set_9	2.00031	0	0	902.397	49.0068	4.48793e-12	6
M_0.25_F_lqp_Set_1	2.01652	0	0.0833333	865.675	12.2855	0.000422642	5
M_0.25_F_lqp_Set_10	1.93037	0	0.208333	888.623	35.2335	4.39416e-09	9
M_0.25_F_lqp_Set_11	2.16898	0	0.0833333	856.64	3.25048	0.0387165	12
M_0.25_F_lqp_Set_2	2.02426	0	0.0416667	864.991	11.6007	0.000595211	5
M_0.25_F_lqp_Set_3	2.05227	0	0.125	898.684	45.2939	2.87261e-11	5
M_0.25_F_lqp_Set_4	2.15659	0	0.0416667	898.919	45.5288	2.55429e-11	4
M_0.25_F_lqp_Set_5	1.70386	0	0.125	893.324	39.9345	4.18855e-10	5
M_0.25_F_lqp_Set_6	3.97084	0	0.0416667	918.576	65.1864	1.37623e-15	4
M_0.25_F_lqp_Set_7	2.12584	0	0.0833333	855.644	2.25389	0.0637239	9
M_0.25_F_lqp_Set_8	2.09694	0	0.166667	861.851	8.46083	0.00286077	9
M_0.25_F_lqp_Set_9	2.04112	0	0.0416667	867.304	13.9138	0.000187232	7
M_0.25_F_lqpt_Set_1	2.32437	0	0.75	1456.45	603.061	2.19123e-132	42
M_0.25_F_lqpt_Set_10	2.27678	0	0.833333	NA	NA	NA	65
M_0.25_F_lqpt_Set_11	2.38909	0	0.916667	NA	NA	NA	79
M_0.25_F_lqpt_Set_2	2.05213	0	0.375	NA	NA	NA	52
M_0.25_F_lqpt_Set_3	2.05148	0	0.25	2250.68	1397.29	7.5027e-305	45
M_0.25_F_lqpt_Set_4	2.66183	0	0.666667	1296.11	442.718	1.44125e-97	40
M_0.25_F_lqpt_Set_5	1.91461	0	0.75	NA	NA	NA	48
M_0.25_F_lqpt_Set_6	4.41488	0	0.583333	3046.4	2193.01	0	46
M_0.25_F_lqpt_Set_7	2.32774	0	0.875	NA	NA	NA	68
M_0.25_F_lqpt_Set_8	2.69044	0	0.791667	NA	NA	NA	58
M_0.25_F_lqpt_Set_9	2.1524	0	0.458333	NA	NA	NA	63
M_0.25_F_lqpth_Set_1	1.99019	0	0.625	NA	NA	NA	51
M_0.25_F_lqpth_Set_10	2.47405	0	0.875	NA	NA	NA	74
M_0.25_F_lqpth_Set_11	2.28097	0	0.875	NA	NA	NA	86
M_0.25_F_lqpth_Set_2	2.01686	0	0.583333	NA	NA	NA	54
M_0.25_F_lqpth_Set_3	1.75312	0	0.333333	NA	NA	NA	50
M_0.25_F_lqpth_Set_4	1.75145	0	0.833333	NA	NA	NA	48
M_0.25_F_lqpth_Set_5	2.13494	0	0.75	NA	NA	NA	51
M_0.25_F_lqpth_Set_6	3.27383	0	0.625	NA	NA	NA	50
M_0.25_F_lqpth_Set_7	2.25981	0	0.791667	NA	NA	NA	72
M_0.25_F_lqpth_Set_8	2.29448	0	0.791667	NA	NA	NA	66
M_0.25_F_lqpth_Set_9	2.03119	0	0.583333	NA	NA	NA	69
M_0.25_F_lqph_Set_1	1.97973	0	0.125	NA	NA	NA	63
M_0.25_F_lqph_Set_10	1.90241	0	0.291667	NA	NA	NA	90
M_0.25_F_lqph_Set_11	2.35601	0	0.25	NA	NA	NA	100
M_0.25_F_lqph_Set_2	2.04414	0	0.0833333	1041.73	188.335	2.49613e-42	32
M_0.25_F_lqph_Set_3	1.80275	0	0.166667	NA	NA	NA	75
M_0.25_F_lqph_Set_4	1.93541	0	0.125	NA	NA	NA	53
M_0.25_F_lqph_Set_5	1.9188	0	0.333333	NA	NA	NA	99
M_0.25_F_lqph_Set_6	4.83322	0	0.208333	NA	NA	NA	103
M_0.25_F_lqph_Set_7	1.99794	0	0.0833333	NA	NA	NA	82
M_0.25_F_lqph_Set_8	2.07174	0	0.25	NA	NA	NA	87
M_0.25_F_lqph_Set_9	2.09794	0	0.125	NA	NA	NA	96
M_0.5_F_lq_Set_1	1.96094	0	0.125	879.932	26.5418	3.39048e-07	4
M_0.5_F_lq_Set_10	2.07645	0	0.0416667	901.164	47.7742	8.31156e-12	6
M_0.5_F_lq_Set_11	2.01068	0	0.0833333	862.285	8.8953	0.00230218	7
M_0.5_F_lq_Set_2	2.05151	0	0.0833333	866.072	12.6822	0.000346597	4
M_0.5_F_lq_Set_3	2.00874	0	0.166667	899.005	45.6153	2.44622e-11	3
M_0.5_F_lq_Set_4	2.12806	0	0.0416667	898.904	45.5138	2.57358e-11	4
M_0.5_F_lq_Set_5	1.6924	0	0.166667	909.169	55.7795	1.51834e-13	4
M_0.5_F_lq_Set_6	3.93602	0	0.0416667	918.565	65.1751	1.38399e-15	4
M_0.5_F_lq_Set_7	2.0151	0	0.0833333	862.594	9.20415	0.00197276	6
M_0.5_F_lq_Set_8	1.73959	0	0.125	883.74	30.3495	5.05136e-08	6
M_0.5_F_lq_Set_9	2.0505	0	0.0833333	865.908	12.5185	0.000376165	5
M_0.5_F_lp_Set_1	1.9515	0	0.125	924.496	71.1063	7.13178e-17	3
M_0.5_F_lp_Set_10	2.29262	0	0.125	902.02	48.6303	5.4173e-12	4
M_0.5_F_lp_Set_11	2.39046	0	0.25	898.422	45.0324	3.27394e-11	9
M_0.5_F_lp_Set_2	3.07098	0	0.0416667	911.589	58.199	4.52882e-14	3
M_0.5_F_lp_Set_3	2.00013	0	0.125	927.733	74.3435	1.41331e-17	3
M_0.5_F_lp_Set_4	2.28651	0	0.0833333	908.414	55.0236	2.21564e-13	3
M_0.5_F_lp_Set_5	1.86822	0	0.125	923.717	70.3269	1.05303e-16	3
M_0.5_F_lp_Set_6	3.90612	0	0.0416667	914.429	61.0392	1.09455e-14	2
M_0.5_F_lp_Set_7	2.38505	0	0.0416667	906.653	53.2629	5.34355e-13	6
M_0.5_F_lp_Set_8	1.98834	0	0.125	901.907	48.5171	5.7329e-12	6
M_0.5_F_lp_Set_9	3.16135	0	0.208333	910.165	56.7748	9.23092e-14	4
M_0.5_F_q_Set_1	2.04155	0	0.0833333	927.003	73.6132	2.03621e-17	2
M_0.5_F_q_Set_10	2.04407	0	0.166667	930.436	77.0457	3.6598e-18	3
M_0.5_F_q_Set_11	2.13965	0	0.125	917.774	64.3838	2.05577e-15	4
M_0.5_F_q_Set_2	51.3646	0	0.125	919.273	65.8827	9.71596e-16	2
M_0.5_F_q_Set_3	2.26813	0	0.0833333	926.114	72.724	3.17617e-17	2
M_0.5_F_q_Set_4	2.04493	0	0.0833333	930.165	76.7746	4.19122e-18	2
M_0.5_F_q_Set_5	2.02864	0	0.166667	934.192	80.802	5.59509e-19	2
M_0.5_F_q_Set_6	20.5831	0	0.0416667	936.126	82.7355	2.12782e-19	2
M_0.5_F_q_Set_7	2.14453	0	0.0833333	915.565	62.1746	6.20408e-15	3
M_0.5_F_q_Set_8	2.03505	0	0.125	923.211	69.8207	1.35628e-16	3
M_0.5_F_q_Set_9	2.59684	0	0.125	921.061	67.6706	3.97414e-16	3
M_0.5_F_qp_Set_1	1.99741	0	0.125	909.033	55.6435	1.62514e-13	3
M_0.5_F_qp_Set_10	2.02876	0	0.166667	927.309	73.9194	1.74717e-17	6
M_0.5_F_qp_Set_11	1.99634	0	0	882.665	29.2754	8.64269e-08	8
M_0.5_F_qp_Set_2	2.00142	0	0.0416667	904.342	50.9519	1.69695e-12	3
M_0.5_F_qp_Set_3	2.00902	0	0.0833333	926.773	73.383	2.2846e-17	3
M_0.5_F_qp_Set_4	2.03382	0	0.0416667	932.253	78.8629	1.47528e-18	3
M_0.5_F_qp_Set_5	2.0231	0	0.125	935.689	82.2986	2.64734e-19	3
M_0.5_F_qp_Set_6	38.7294	0	0.0416667	935.816	82.4257	2.48438e-19	3
M_0.5_F_qp_Set_7	1.99663	0	0	885.164	31.7742	2.47774e-08	5
M_0.5_F_qp_Set_8	2.22547	0	0.125	908.801	55.4113	1.82526e-13	6
M_0.5_F_qp_Set_9	2.00143	0	0	902.958	49.5683	3.38933e-12	6
M_0.5_F_lqp_Set_1	1.96273	0	0.0833333	866.68	13.2896	0.000255822	5
M_0.5_F_lqp_Set_10	1.93354	0	0.166667	890.953	37.5628	1.37111e-09	9
M_0.5_F_lqp_Set_11	2.00344	0	0.0833333	855.084	1.69397	0.0843117	11
M_0.5_F_lqp_Set_2	2.01039	0	0.0416667	865.682	12.2918	0.000421312	5
M_0.5_F_lqp_Set_3	2.00818	0	0.166667	899.651	46.2609	1.77138e-11	5
M_0.5_F_lqp_Set_4	2.06258	0	0.0416667	899.328	45.9376	2.08213e-11	4
M_0.5_F_lqp_Set_5	1.65638	0	0.125	894.897	41.5071	1.90798e-10	5
M_0.5_F_lqp_Set_6	3.90465	0	0.0416667	918.881	65.4909	1.18185e-15	4
M_0.5_F_lqp_Set_7	2.02754	0	0.0833333	854.233	0.843027	0.129023	8
M_0.5_F_lqp_Set_8	2.00329	0	0.166667	860.774	7.38378	0.00490187	8
M_0.5_F_lqp_Set_9	2.02128	0	0.0416667	865.367	11.9775	0.000493006	6
M_0.5_F_lqpt_Set_1	1.89944	0	0.125	867.585	14.1949	0.000162687	17
M_0.5_F_lqpt_Set_10	2.025	0	0.375	961.214	107.824	7.5857e-25	28
M_0.5_F_lqpt_Set_11	2.12461	0	0.333333	997.009	143.619	1.27985e-32	33
M_0.5_F_lqpt_Set_2	1.88022	0	0.0833333	884.006	30.6161	4.4211e-08	16
M_0.5_F_lqpt_Set_3	1.72	0	0.208333	927.033	73.6435	2.00559e-17	22
M_0.5_F_lqpt_Set_4	2.1505	0	0.125	913.923	60.5326	1.41006e-14	16
M_0.5_F_lqpt_Set_5	1.75956	0	0.291667	921.824	68.4339	2.71329e-16	22
M_0.5_F_lqpt_Set_6	3.49815	0	0.291667	924.314	70.9241	7.81175e-17	16
M_0.5_F_lqpt_Set_7	2.07022	0	0.0833333	871.257	17.8672	2.59372e-05	20
M_0.5_F_lqpt_Set_8	2.05775	0	0.375	912.793	59.4032	2.48017e-14	27
M_0.5_F_lqpt_Set_9	1.89508	0	0.333333	900.76	47.3704	1.01713e-11	23
M_0.5_F_lqpth_Set_1	2.14108	0	0.125	883.933	30.5433	4.58492e-08	21
M_0.5_F_lqpth_Set_10	1.93407	0	0.375	1304.28	450.894	2.41764e-99	40
M_0.5_F_lqpth_Set_11	2.08095	0	0.333333	NA	NA	NA	49
M_0.5_F_lqpth_Set_2	2.01242	0	0.0833333	942.432	89.042	9.08869e-21	25
M_0.5_F_lqpth_Set_3	2.00991	0	0.208333	985.233	131.843	4.61627e-30	28
M_0.5_F_lqpth_Set_4	2.30303	0	0.125	987.449	134.059	1.52493e-30	27
M_0.5_F_lqpth_Set_5	2.00835	0	0.375	963.593	110.203	2.30944e-25	27
M_0.5_F_lqpth_Set_6	2.28986	0	0.291667	1294.91	441.524	2.61787e-97	39
M_0.5_F_lqpth_Set_7	2.28509	0	0.0833333	956.609	103.219	7.58408e-24	30
M_0.5_F_lqpth_Set_8	2.20929	0	0.291667	1018.86	165.468	2.30591e-37	34
M_0.5_F_lqpth_Set_9	2.1457	0	0.291667	1105.75	252.36	3.12226e-56	36
M_0.5_F_lqph_Set_1	2.0029	0	0.125	5443.41	4590.02	0	47
M_0.5_F_lqph_Set_10	2.06488	0	0.291667	NA	NA	NA	48
M_0.5_F_lqph_Set_11	1.93549	0	0.125	NA	NA	NA	49
M_0.5_F_lqph_Set_2	2.06479	0	0.0833333	910.945	57.5551	6.24884e-14	18
M_0.5_F_lqph_Set_3	2.03176	0	0.166667	NA	NA	NA	53
M_0.5_F_lqph_Set_4	2.25865	0	0.0416667	5482.15	4628.76	0	47
M_0.5_F_lqph_Set_5	1.85287	0	0.208333	NA	NA	NA	56
M_0.5_F_lqph_Set_6	3.38716	0	0.166667	NA	NA	NA	86
M_0.5_F_lqph_Set_7	2.33435	0	0.0833333	1040.06	186.669	5.74198e-42	33
M_0.5_F_lqph_Set_8	2.16927	0	0.25	NA	NA	NA	51
M_0.5_F_lqph_Set_9	2.08118	0	0.0833333	2313.21	1459.82	1.98646009829515e-318	45
M_0.75_F_lq_Set_1	1.98034	0	0.166667	880.057	26.6668	3.185e-07	4
M_0.75_F_lq_Set_10	2.07067	0	0.0416667	901.396	48.0062	7.40142e-12	6
M_0.75_F_lq_Set_11	2.00678	0	0.0833333	862.511	9.12104	0.00205646	7
M_0.75_F_lq_Set_2	2.03887	0	0.0833333	866.311	12.9212	0.000307564	4
M_0.75_F_lq_Set_3	2.00472	0	0.166667	899.11	45.7199	2.32152e-11	3
M_0.75_F_lq_Set_4	2.10414	0	0.0416667	899.06	45.6697	2.38055e-11	4
M_0.75_F_lq_Set_5	1.6894	0	0.166667	909.267	55.8775	1.44575e-13	4
M_0.75_F_lq_Set_6	3.9674	0	0.0416667	918.681	65.2913	1.30589e-15	4
M_0.75_F_lq_Set_7	2.0078	0	0.0833333	862.844	9.45437	0.00174076	6
M_0.75_F_lq_Set_8	1.72019	0	0.166667	883.878	30.4877	4.71415e-08	6
M_0.75_F_lq_Set_9	2.03737	0	0.0833333	866.115	12.7247	0.000339305	5
M_0.75_F_lp_Set_1	1.9478	0	0.125	924.546	71.1563	6.95545e-17	3
M_0.75_F_lp_Set_10	2.42136	0	0.125	902.266	48.8764	4.79008e-12	4
M_0.75_F_lp_Set_11	2.28927	0	0.25	899.534	46.1437	1.87825e-11	9
M_0.75_F_lp_Set_2	3.05518	0	0.0416667	911.934	58.5438	3.81158e-14	3
M_0.75_F_lp_Set_3	2.00103	0	0.125	928.081	74.6913	1.18775e-17	3
M_0.75_F_lp_Set_4	2.25704	0	0.0833333	906.258	52.8683	6.50907e-13	2
M_0.75_F_lp_Set_5	1.79884	0	0.125	924.035	70.6452	8.98087e-17	3
M_0.75_F_lp_Set_6	3.7031	0	0.0416667	914.517	61.1271	1.04749e-14	2
M_0.75_F_lp_Set_7	2.19777	0	0.0416667	904.579	51.1888	1.50741e-12	5
M_0.75_F_lp_Set_8	1.98728	0	0.125	902.566	49.1763	4.1231e-12	6
M_0.75_F_lp_Set_9	3.06564	0	0.208333	910.285	56.8953	8.69099e-14	4
M_0.75_F_q_Set_1	2.03846	0	0.0833333	927.042	73.652	1.99707e-17	2
M_0.75_F_q_Set_10	2.04038	0	0.166667	930.484	77.0939	3.57269e-18	3
M_0.75_F_q_Set_11	2.14195	0	0.125	917.83	64.4398	1.99899e-15	4
M_0.75_F_q_Set_2	47.5099	0	0.125	919.309	65.919	9.54133e-16	2
M_0.75_F_q_Set_3	2.24511	0	0.0833333	926.149	72.7586	3.1218e-17	2
M_0.75_F_q_Set_4	2.0477	0	0.0833333	930.214	76.8239	4.08911e-18	2
M_0.75_F_q_Set_5	2.02546	0	0.166667	934.236	80.8456	5.47439e-19	2
M_0.75_F_q_Set_6	21.8244	0	0.0416667	936.149	82.7588	2.10323e-19	2
M_0.75_F_q_Set_7	2.14053	0	0.0833333	915.615	62.2251	6.04946e-15	3
M_0.75_F_q_Set_8	2.03721	0	0.125	923.258	69.8677	1.32481e-16	3
M_0.75_F_q_Set_9	2.59839	0	0.125	921.104	67.7139	3.88912e-16	3
M_0.75_F_qp_Set_1	1.99983	0	0.0833333	909.886	56.4961	1.06108e-13	3
M_0.75_F_qp_Set_10	2.01211	0	0.166667	928.916	75.526	7.82482e-18	6
M_0.75_F_qp_Set_11	1.99431	0	0	884.187	30.7971	4.03859e-08	8
M_0.75_F_qp_Set_2	2.0013	0	0.0416667	904.629	51.2392	1.46984e-12	3
M_0.75_F_qp_Set_3	2.01021	0	0.0833333	926.983	73.5929	2.05704e-17	3
M_0.75_F_qp_Set_4	2.03055	0	0.0416667	932.462	79.0717	1.32904e-18	3
M_0.75_F_qp_Set_5	2.02168	0	0.0833333	935.954	82.5642	2.31816e-19	3
M_0.75_F_qp_Set_6	38.5465	0	0.0416667	935.903	82.5132	2.37804e-19	3
M_0.75_F_qp_Set_7	1.99702	0	0	886.239	32.849	1.44764e-08	5
M_0.75_F_qp_Set_8	2.01841	0	0.125	909.832	56.4419	1.09023e-13	6
M_0.75_F_qp_Set_9	2.00066	0	0.0416667	903.75	50.3598	2.28161e-12	6
M_0.75_F_lqp_Set_1	1.95867	0	0.0833333	867.959	14.5692	0.000134914	5
M_0.75_F_lqp_Set_10	1.9334	0	0.166667	890.885	37.4955	1.418e-09	8
M_0.75_F_lqp_Set_11	2.00062	0	0.0833333	857.757	4.36709	0.0221527	11
M_0.75_F_lqp_Set_2	2.00526	0	0.0416667	866.727	13.3372	0.000249805	5
M_0.75_F_lqp_Set_3	2.00222	0	0.166667	900.912	47.5217	9.4301e-12	5
M_0.75_F_lqp_Set_4	2.03973	0	0.0416667	897.287	43.8969	5.77607e-11	3
M_0.75_F_lqp_Set_5	1.7032	0	0.125	894.105	40.7147	2.83559e-10	4
M_0.75_F_lqp_Set_6	3.61294	0	0.0416667	914.517	61.1271	1.04749e-14	2
M_0.75_F_lqp_Set_7	2.00925	0	0.0833333	853.39	0	0.196666	7
M_0.75_F_lqp_Set_8	2.0002	0	0.0833333	863.327	9.93705	0.0013675	8
M_0.75_F_lqp_Set_9	2.00543	0	0.0416667	866.557	13.167	0.000271988	6
M_0.75_F_lqpt_Set_1	1.73331	0	0.166667	860.807	7.41718	0.00482069	12
M_0.75_F_lqpt_Set_10	2.08538	0	0.25	900	46.6103	1.48737e-11	17
M_0.75_F_lqpt_Set_11	1.88333	0	0.166667	875.188	21.7981	3.63348e-06	20
M_0.75_F_lqpt_Set_2	1.9526	0	0.0833333	877.586	24.1957	1.09572e-06	11
M_0.75_F_lqpt_Set_3	1.66772	0	0.208333	901.42	48.03	7.31378e-12	13
M_0.75_F_lqpt_Set_4	2.39458	0	0.125	899.346	45.9562	2.06283e-11	10
M_0.75_F_lqpt_Set_5	1.69934	0	0.25	893.178	39.7877	4.5075e-10	12
M_0.75_F_lqpt_Set_6	3.01046	0	0.208333	916.779	63.3893	3.38e-15	11
M_0.75_F_lqpt_Set_7	1.87236	0	0.0833333	853.925	0.534641	0.150533	13
M_0.75_F_lqpt_Set_8	1.85178	0	0.291667	875.634	22.2442	2.90707e-06	19
M_0.75_F_lqpt_Set_9	1.96384	0	0.166667	886.476	33.0858	1.286e-08	17
M_0.75_F_lqpth_Set_1	2.02561	0	0.125	877.667	24.2769	1.05213e-06	16
M_0.75_F_lqpth_Set_10	1.85982	0	0.208333	907.837	54.4466	2.95658e-13	20
M_0.75_F_lqpth_Set_11	2.13707	0	0.166667	918.629	65.2393	1.3403e-15	26
M_0.75_F_lqpth_Set_2	2.051	0	0.0833333	888.364	34.9741	5.00261e-09	14
M_0.75_F_lqpth_Set_3	2.00941	0	0.166667	1042.1	188.708	2.07175e-42	31
M_0.75_F_lqpth_Set_4	2.2024	0	0.0416667	949.479	96.0893	2.68043e-22	21
M_0.75_F_lqpth_Set_5	1.8785	0	0.208333	931.083	77.6927	2.64833e-18	21
M_0.75_F_lqpth_Set_6	2.08654	0	0.208333	1011.59	158.201	8.72586e-36	27
M_0.75_F_lqpth_Set_7	2.06759	0	0.0833333	881.367	27.9768	1.65445e-07	19
M_0.75_F_lqpth_Set_8	2.09199	0	0.291667	914.912	61.5221	8.59766e-15	25
M_0.75_F_lqpth_Set_9	2.05021	0	0.0833333	908.839	55.449	1.79115e-13	21
M_0.75_F_lqph_Set_1	1.9801	0	0.125	1009.34	155.949	2.69057e-35	30
M_0.75_F_lqph_Set_10	1.92642	0	0.25	1279.33	425.939	6.34381e-94	39
M_0.75_F_lqph_Set_11	2.08643	0	0.0833333	918.734	65.3438	1.27204e-15	24
M_0.75_F_lqph_Set_2	2.04946	0	0.0833333	885.978	32.5883	1.64922e-08	12
M_0.75_F_lqph_Set_3	2.00863	0	0.166667	1306.43	453.037	8.27808e-100	39
M_0.75_F_lqph_Set_4	2.20459	0	0.0416667	1043.19	189.8	1.19975e-42	30
M_0.75_F_lqph_Set_5	1.70058	0	0.125	1243.73	390.344	3.40089e-86	38
M_0.75_F_lqph_Set_6	2.61562	0	0.166667	NA	NA	NA	69
M_0.75_F_lqph_Set_7	2.08053	0	0.0833333	888.738	35.3485	4.14859e-09	18
M_0.75_F_lqph_Set_8	2.06439	0	0.166667	931.696	78.3065	1.94847e-18	24
M_0.75_F_lqph_Set_9	2.05224	0	0.0833333	890.513	37.1233	1.70804e-09	14
M_1_F_lq_Set_1	1.97798	0	0.166667	880.226	26.8357	2.92702e-07	4
M_1_F_lq_Set_10	2.05567	0	0.0416667	901.714	48.3242	6.31349e-12	6
M_1_F_lq_Set_11	2.00519	0	0.0833333	862.819	9.42859	0.00176334	7
M_1_F_lq_Set_2	2.02825	0	0.0833333	866.63	13.2404	0.000262189	4
M_1_F_lq_Set_3	2.00342	0	0.166667	899.25	45.8598	2.16472e-11	3
M_1_F_lq_Set_4	2.0781	0	0.0416667	899.271	45.8811	2.1418e-11	4
M_1_F_lq_Set_5	1.77926	0	0.166667	909.4	56.01	1.35304e-13	4
M_1_F_lq_Set_6	3.86192	0	0.0416667	918.839	65.4488	1.207e-15	4
M_1_F_lq_Set_7	2.00541	0	0.0833333	863.175	9.78537	0.00147524	6
M_1_F_lq_Set_8	2.01196	0	0.166667	884.064	30.6742	4.29452e-08	6
M_1_F_lq_Set_9	2.02846	0	0.0833333	866.4	13.0096	0.000294254	5
M_1_F_lp_Set_1	1.9475	0	0.125	924.611	71.2207	6.73505e-17	3
M_1_F_lp_Set_10	2.39339	0	0.125	902.608	49.218	4.03814e-12	4
M_1_F_lp_Set_11	2.32701	0	0.208333	901.077	47.6875	8.67985e-12	9
M_1_F_lp_Set_2	3.00617	0	0.0416667	912.401	59.0114	3.01696e-14	3
M_1_F_lp_Set_3	2.0017	0	0.0833333	928.563	75.1735	9.33259e-18	3
M_1_F_lp_Set_4	2.20546	0	0.0833333	906.364	52.9736	6.17531e-13	2
M_1_F_lp_Set_5	1.78839	0	0.125	924.475	71.0851	7.20761e-17	3
M_1_F_lp_Set_6	3.24462	0	0.0416667	914.637	61.2475	9.86297e-15	2
M_1_F_lp_Set_7	2.10162	0	0.0416667	905.118	51.7277	1.15131e-12	5
M_1_F_lp_Set_8	1.98925	0	0.0833333	903.465	50.0754	2.63027e-12	6
M_1_F_lp_Set_9	3.05287	0	0.166667	910.449	57.0589	8.00852e-14	4
M_1_F_q_Set_1	2.04018	0	0.0833333	927.096	73.7058	1.94411e-17	2
M_1_F_q_Set_10	2.03855	0	0.125	930.548	77.1579	3.46023e-18	3
M_1_F_q_Set_11	2.10971	0	0.125	917.906	64.5162	1.92404e-15	4
M_1_F_q_Set_2	39.2996	0	0.125	919.36	65.9698	9.30202e-16	2
M_1_F_q_Set_3	2.22234	0	0.0833333	926.194	72.8042	3.05135e-17	2
M_1_F_q_Set_4	2.04918	0	0.0833333	930.28	76.8897	3.95685e-18	2
M_1_F_q_Set_5	2.02334	0	0.166667	934.295	80.9047	5.31486e-19	2
M_1_F_q_Set_6	22.5621	0	0.0416667	936.177	82.7874	2.07331e-19	2
M_1_F_q_Set_7	2.09015	0	0.0833333	915.686	62.2958	5.83951e-15	3
M_1_F_q_Set_8	2.03216	0	0.0833333	923.321	69.9313	1.28335e-16	3
M_1_F_q_Set_9	2.57236	0	0.125	921.16	67.7705	3.78054e-16	3
M_1_F_qp_Set_1	1.99961	0	0.0833333	910.843	57.4526	6.57751e-14	3
M_1_F_qp_Set_10	2.01109	0	0.166667	926.959	73.5687	2.08202e-17	5
M_1_F_qp_Set_11	1.99495	0	0.0833333	888.954	35.5643	3.7243e-09	9
M_1_F_qp_Set_2	2.00137	0	0.0416667	905.017	51.6266	1.21104e-12	3
M_1_F_qp_Set_3	2.13927	0	0.0833333	927.269	73.8793	1.78256e-17	3
M_1_F_qp_Set_4	2.02856	0	0.0416667	932.74	79.3505	1.15605e-18	3
M_1_F_qp_Set_5	2.024	0	0.0833333	936.311	82.9206	1.9398e-19	3
M_1_F_qp_Set_6	40.4711	0	0.0416667	936.018	82.6278	2.24559e-19	3
M_1_F_qp_Set_7	1.99676	0	0	887.452	34.0621	7.8929e-09	5
M_1_F_qp_Set_8	2.00618	0	0.0833333	908.408	55.0182	2.22162e-13	5
M_1_F_qp_Set_9	2.00041	0	0.0416667	904.709	51.3191	1.41229e-12	6
M_1_F_lqp_Set_1	1.95146	0	0.0833333	869.399	16.0087	6.56886e-05	5
M_1_F_lqp_Set_10	1.96076	0	0.125	888.056	34.6663	5.83481e-09	6
M_1_F_lqp_Set_11	2.00127	0	0.0833333	857.525	4.13523	0.0248757	10
M_1_F_lqp_Set_2	2.00301	0	0.0416667	868.065	14.6749	0.000127972	5
M_1_F_lqp_Set_3	2.00065	0	0.166667	902.34	48.9497	4.61776e-12	5
M_1_F_lqp_Set_4	2.06049	0	0.0416667	897.71	44.3203	4.67401e-11	3
M_1_F_lqp_Set_5	1.70227	0	0.125	895.452	42.0622	1.4456e-10	4
M_1_F_lqp_Set_6	3.32764	0	0.0416667	914.637	61.2475	9.86297e-15	2
M_1_F_lqp_Set_7	2.00347	0	0.0833333	855.058	1.66826	0.0854024	7
M_1_F_lqp_Set_8	1.99806	0	0.0833333	866.322	12.932	0.000305896	8
M_1_F_lqp_Set_9	2.00327	0	0.0416667	868.1	14.7097	0.000125765	6
M_1_F_lqpt_Set_1	1.70026	0	0.166667	872.302	18.9122	1.53812e-05	11
M_1_F_lqpt_Set_10	1.91838	0	0.25	899.175	45.7851	2.24706e-11	15
M_1_F_lqpt_Set_11	1.89378	0	0.166667	868.652	15.2618	9.54269e-05	16
M_1_F_lqpt_Set_2	1.97715	0	0.0833333	870.938	17.5484	3.04183e-05	7
M_1_F_lqpt_Set_3	1.65532	0	0.166667	900.153	46.7633	1.37786e-11	8
M_1_F_lqpt_Set_4	2.46225	0	0.0833333	896.648	43.2579	7.95046e-11	8
M_1_F_lqpt_Set_5	2.01338	0	0.291667	892.694	39.3044	5.7397e-10	10
M_1_F_lqpt_Set_6	3.02816	0	0.208333	914.093	60.7034	1.29465e-14	7
M_1_F_lqpt_Set_7	2.01611	0	0.0833333	856.339	2.94879	0.0450202	10
M_1_F_lqpt_Set_8	1.824	0	0.291667	865.402	12.0125	0.00048446	13
M_1_F_lqpt_Set_9	1.97883	0	0.0833333	874.902	21.5118	4.1928e-06	11
M_1_F_lqpth_Set_1	1.93451	0	0.125	883.122	29.7323	6.87759e-08	14
M_1_F_lqpth_Set_10	1.8272	0	0.166667	948.31	94.9202	4.80921e-22	24
M_1_F_lqpth_Set_11	2.02594	0	0.166667	916.369	62.9786	4.15051e-15	24
M_1_F_lqpth_Set_2	2.03294	0	0.0833333	881.496	28.106	1.55091e-07	11
M_1_F_lqpth_Set_3	2.00459	0	0.166667	1027.52	174.13	3.03281e-39	29
M_1_F_lqpth_Set_4	2.15373	0	0.0416667	909.927	56.5367	1.0398e-13	12
M_1_F_lqpth_Set_5	1.85803	0	0.0833333	943.342	89.9518	5.76695e-21	21
M_1_F_lqpth_Set_6	2.12929	0	0.125	1133.27	279.879	3.3022e-62	34
M_1_F_lqpth_Set_7	2.00781	0	0.0833333	875.541	22.1512	3.04547e-06	15
M_1_F_lqpth_Set_8	1.9833	0	0.291667	881.993	28.6026	1.20991e-07	17
M_1_F_lqpth_Set_9	2.02667	0	0.0833333	888.462	35.0722	4.76311e-09	15
M_1_F_lqph_Set_1	1.89485	0	0.125	898.383	44.9926	3.33968e-11	16
M_1_F_lqph_Set_10	2.17454	0	0.208333	953.91	100.52	2.92469e-23	23
M_1_F_lqph_Set_11	2.00034	0	0.0833333	895.647	42.2566	1.31168e-10	20
M_1_F_lqph_Set_2	2.03478	0	0.0833333	890.485	37.0947	1.73266e-09	13
M_1_F_lqph_Set_3	2.00418	0	0.166667	991.272	137.882	2.25449e-31	25
M_1_F_lqph_Set_4	2.15402	0	0.0416667	912.033	58.6432	3.62678e-14	11
M_1_F_lqph_Set_5	1.73957	0	0.125	1093.7	240.312	1.29011e-53	33
M_1_F_lqph_Set_6	2.38867	0	0.125	NA	NA	NA	53
M_1_F_lqph_Set_7	2.00565	0	0.0833333	876.963	23.5733	1.49576e-06	15
M_1_F_lqph_Set_8	2.00565	0	0.166667	914.894	61.5041	8.67532e-15	21
M_1_F_lqph_Set_9	2.03379	0	0.0833333	884.324	30.9341	3.77111e-08	12
M_2_F_lq_Set_1	1.98359	0	0.0833333	881.288	27.8976	1.72125e-07	4
M_2_F_lq_Set_10	2.04676	0	0.0416667	897.98	44.5899	4.08456e-11	4
M_2_F_lq_Set_11	2.00258	0	0.0833333	864.817	11.4272	0.000649146	7
M_2_F_lq_Set_2	2.00533	0	0.0833333	868.576	15.186	9.91151e-05	4
M_2_F_lq_Set_3	2.00096	0	0.166667	900.116	46.7265	1.40343e-11	3
M_2_F_lq_Set_4	2.05679	0	0.0416667	897.609	44.2188	4.91746e-11	3
M_2_F_lq_Set_5	1.96691	0	0.125	910.243	56.8528	8.87785e-14	4
M_2_F_lq_Set_6	3.2066	0	0.0416667	914.608	61.2181	1.00091e-14	2
M_2_F_lq_Set_7	2.00257	0	0.0833333	862.333	8.9435	0.00224736	5
M_2_F_lq_Set_8	1.99584	0	0.0833333	885.238	31.8479	2.3881e-08	6
M_2_F_lq_Set_9	2.00548	0	0.0833333	868.276	14.8862	0.000115142	5
M_2_F_lp_Set_1	1.95212	0	0.125	925.017	71.6275	5.49562e-17	3
M_2_F_lp_Set_10	2.14676	0	0.0833333	905.019	51.629	1.20955e-12	4
M_2_F_lp_Set_11	2.11876	0	0.0416667	906.271	52.8812	6.46729e-13	8
M_2_F_lp_Set_2	2.74931	0	0.0416667	911.669	58.279	4.35121e-14	2
M_2_F_lp_Set_3	1.66047	0	0.0833333	931.825	78.4346	1.82754e-18	3
M_2_F_lp_Set_4	2.14639	0	0.0833333	907.067	53.6773	4.34371e-13	2
M_2_F_lp_Set_5	1.51841	0	0.125	927.473	74.0826	1.61022e-17	3
M_2_F_lp_Set_6	2.57862	0	0.166667	915.466	62.0765	6.51611e-15	2
M_2_F_lp_Set_7	2.07549	0	0.0416667	908.7	55.3101	1.91995e-13	5
M_2_F_lp_Set_8	1.97627	0	0.0833333	901.89	48.5005	5.78071e-12	4
M_2_F_lp_Set_9	2.70663	0	0.0416667	911.552	58.1617	4.61408e-14	4
M_2_F_q_Set_1	2.02536	0	0.0833333	927.453	74.0634	1.62577e-17	2
M_2_F_q_Set_10	2.0571	0	0.125	930.959	77.569	2.81729e-18	3
M_2_F_q_Set_11	2.07769	0	0.125	918.412	65.0218	1.49424e-15	4
M_2_F_q_Set_2	32.1503	0	0.125	919.709	66.3189	7.81189e-16	2
M_2_F_q_Set_3	2.18404	0	0.0833333	926.489	73.0988	2.63346e-17	2
M_2_F_q_Set_4	2.06	0	0.0833333	930.7	77.3097	3.20732e-18	2
M_2_F_q_Set_5	2.02166	0	0.125	934.683	81.2933	4.37633e-19	2
M_2_F_q_Set_6	28.3926	0	0.0416667	936.351	82.9608	1.90113e-19	2
M_2_F_q_Set_7	2.05426	0	0.125	916.169	62.7788	4.58663e-15	3
M_2_F_q_Set_8	2.02624	0	0.0833333	923.74	70.3498	1.04101e-16	3
M_2_F_q_Set_9	2.46482	0	0.125	921.521	68.1306	3.15754e-16	3
M_2_F_qp_Set_1	1.99611	0	0.125	915.171	61.781	7.55345e-15	3
M_2_F_qp_Set_10	2.00195	0	0.25	930.782	77.3916	3.07857e-18	5
M_2_F_qp_Set_11	1.99353	0	0.0416667	897.146	43.7556	6.19892e-11	9
M_2_F_qp_Set_2	2.00065	0	0.0416667	907.48	54.0904	3.53301e-13	3
M_2_F_qp_Set_3	2.15264	0	0.0833333	929.152	75.7616	6.95505e-18	3
M_2_F_qp_Set_4	1.99779	0	0.0833333	934.508	81.1185	4.77617e-19	3
M_2_F_qp_Set_5	4.94815	0	0.166667	938.52	85.1305	6.42509e-20	3
M_2_F_qp_Set_6	4.20518	0	0.0416667	936.809	83.4187	1.51214e-19	3
M_2_F_qp_Set_7	1.99353	0	0.0416667	895.878	42.4884	1.16811e-10	6
M_2_F_qp_Set_8	1.99096	0	0.125	914.087	60.6971	1.29873e-14	5
M_2_F_qp_Set_9	2.00072	0	0.0833333	907.121	53.7307	4.22914e-13	5
M_2_F_lqp_Set_1	1.89459	0	0.0833333	876.017	22.6275	2.40013e-06	5
M_2_F_lqp_Set_10	2.14966	0	0.0833333	894.991	41.6009	1.82056e-10	5
M_2_F_lqp_Set_11	2.00149	0	0.0833333	862.613	9.22318	0.00195407	8
M_2_F_lqp_Set_2	2.00182	0	0.0833333	869.598	16.2079	5.94614e-05	4
M_2_F_lqp_Set_3	2.00077	0	0.166667	905.484	52.0936	9.58853e-13	4
M_2_F_lqp_Set_4	2.15269	0	0.0833333	900.22	46.8304	1.33241e-11	3
M_2_F_lqp_Set_5	1.56713	0	0.125	906.04	52.6497	7.26097e-13	5
M_2_F_lqp_Set_6	2.57817	0	0.166667	915.466	62.0765	6.51611e-15	2
M_2_F_lqp_Set_7	2.00151	0	0.0833333	862.565	9.1746	0.00200211	7
M_2_F_lqp_Set_8	1.91132	0	0.125	873.498	20.108	8.45917e-06	7
M_2_F_lqp_Set_9	2.00194	0	0.0833333	869.539	16.1486	6.12507e-05	4
M_2_F_lqpt_Set_1	1.96071	0	0.166667	872.661	19.2709	1.28561e-05	7
M_2_F_lqpt_Set_10	2.09641	0	0.0833333	896.105	42.7153	1.04286e-10	8
M_2_F_lqpt_Set_11	2.454	0	0.0833333	865.18	11.7896	0.000541575	10
M_2_F_lqpt_Set_2	2.31808	0	0.0833333	871.501	18.1112	2.29584e-05	5
M_2_F_lqpt_Set_3	1.50157	0	0.208333	903.663	50.2735	2.38218e-12	4
M_2_F_lqpt_Set_4	2.11504	0	0.0833333	896.22	42.8298	9.84841e-11	4
M_2_F_lqpt_Set_5	1.36676	0	0.0833333	910.968	57.5781	6.1773e-14	8
M_2_F_lqpt_Set_6	2.71776	0	0.166667	916.363	62.9731	4.16193e-15	4
M_2_F_lqpt_Set_7	2.3751	0	0.0833333	862.97	9.57998	0.00163479	9
M_2_F_lqpt_Set_8	1.97241	0	0.208333	872.145	18.7551	1.66385e-05	9
M_2_F_lqpt_Set_9	2.29304	0	0.0833333	871.438	18.048	2.36952e-05	5
M_2_F_lqpth_Set_1	1.68957	0	0.0833333	885.482	32.0925	2.11317e-08	11
M_2_F_lqpth_Set_10	2.04772	0	0.0833333	938.372	84.982	6.92029e-20	19
M_2_F_lqpth_Set_11	1.99679	0	0.0833333	881.909	28.5192	1.26143e-07	15
M_2_F_lqpth_Set_2	2.01109	0	0.0833333	876.722	23.3316	1.68786e-06	8
M_2_F_lqpth_Set_3	2.00027	0	0.0833333	932.698	79.3076	1.18115e-18	14
M_2_F_lqpth_Set_4	2.04682	0	0.0416667	900.082	46.6922	1.42771e-11	6
M_2_F_lqpth_Set_5	1.69607	0	0.125	1003.16	149.772	5.90405e-34	26
M_2_F_lqpth_Set_6	2.45711	0	0.125	972.573	119.183	2.5909e-27	19
M_2_F_lqpth_Set_7	1.99386	0	0.0833333	868.584	15.1936	9.87378e-05	11
M_2_F_lqpth_Set_8	1.99551	0	0.0833333	907.955	54.565	2.78667e-13	18
M_2_F_lqpth_Set_9	2.01183	0	0.0833333	879.742	26.3525	3.72697e-07	9
M_2_F_lqph_Set_1	1.6997	0	0.0833333	897.368	43.9776	5.54769e-11	14
M_2_F_lqph_Set_10	2.05088	0	0.0833333	938.642	85.2517	6.04724e-20	19
M_2_F_lqph_Set_11	1.99693	0	0.0833333	878.208	24.818	8.02735e-07	14
M_2_F_lqph_Set_2	2.0113	0	0.0833333	873.834	20.4442	7.15037e-06	7
M_2_F_lqph_Set_3	2.00032	0	0.0833333	951.471	98.0815	9.89904e-23	18
M_2_F_lqph_Set_4	2.04326	0	0.0416667	902.809	49.4192	3.65168e-12	7
M_2_F_lqph_Set_5	1.71561	0	0.125	1003.39	150.003	5.25921e-34	26
M_2_F_lqph_Set_6	2.46187	0	0.125	998.515	145.125	6.02806e-33	23
M_2_F_lqph_Set_7	1.99484	0	0.0833333	868.618	15.2282	9.7044e-05	11
M_2_F_lqph_Set_8	1.67187	0	0.0833333	940.487	87.0975	2.403e-20	23
M_2_F_lqph_Set_9	2.01211	0	0.0833333	873.794	20.404	7.29548e-06	7
M_3_F_lq_Set_1	1.94532	0	0.0833333	882.871	29.481	7.79833e-08	4
M_3_F_lq_Set_10	2.1303	0	0.0833333	899.104	45.7145	2.3278e-11	4
M_3_F_lq_Set_11	2.00087	0	0.0833333	865.051	11.6606	0.000577648	6
M_3_F_lq_Set_2	2.00186	0	0.0833333	867.52	14.1298	0.000168067	3
M_3_F_lq_Set_3	2.0009	0	0.166667	901.397	48.0067	7.3997e-12	3
M_3_F_lq_Set_4	2.12316	0	0.0833333	898.613	45.223	2.97637e-11	3
M_3_F_lq_Set_5	1.7303	0	0.125	911.528	58.1384	4.668e-14	4
M_3_F_lq_Set_6	2.77919	0	0.0833333	914.914	61.5238	8.59037e-15	2
M_3_F_lq_Set_7	2.00084	0	0.0833333	863.857	10.4669	0.00104924	5
M_3_F_lq_Set_8	1.94555	0	0.0833333	887.002	33.6123	9.88353e-09	6
M_3_F_lq_Set_9	2.00202	0	0.0833333	868.603	15.2128	9.77927e-05	4
M_3_F_lp_Set_1	1.94778	0	0.0833333	925.681	72.2911	3.9438e-17	3
M_3_F_lp_Set_10	2.13093	0	0.0833333	909.431	56.0414	1.33196e-13	4
M_3_F_lp_Set_11	2.06502	0	0.0416667	904.7	51.3098	1.41887e-12	6
M_3_F_lp_Set_2	2.62328	0	0.0416667	912.576	59.1859	2.76484e-14	2
M_3_F_lp_Set_3	1.58564	0	0.0833333	933.871	80.4811	6.5688e-19	2
M_3_F_lp_Set_4	2.12822	0	0.0833333	908.242	54.8518	2.41439e-13	2
M_3_F_lp_Set_5	1.49415	0	0.125	932.587	79.1973	1.24809e-18	3
M_3_F_lp_Set_6	2.57846	0	0.166667	916.912	63.5224	3.1624e-15	2
M_3_F_lp_Set_7	2.06388	0	0.0416667	909.057	55.6673	1.60593e-13	4
M_3_F_lp_Set_8	1.94816	0	0.0833333	905.255	51.8654	1.07472e-12	4
M_3_F_lp_Set_9	2.47248	0	0.0416667	913.448	60.0579	1.78777e-14	4
M_3_F_q_Set_1	2.01863	0	0.0833333	928.025	74.635	1.22164e-17	2
M_3_F_q_Set_10	2.6697	0	0.0833333	931.617	78.227	2.02748e-18	3
M_3_F_q_Set_11	2.09497	0	0.0833333	919.231	65.8408	9.92177e-16	4
M_3_F_q_Set_2	16.9204	0	0.125	920.295	66.905	5.82755e-16	2
M_3_F_q_Set_3	2.15027	0	0.0833333	926.965	73.5755	2.07498e-17	2
M_3_F_q_Set_4	2.29125	0	0.0833333	931.357	77.9672	2.30865e-18	2
M_3_F_q_Set_5	2.06263	0	0.0833333	935.308	81.9178	3.20259e-19	2
M_3_F_q_Set_6	47.4542	0	0.0416667	936.632	83.2418	1.65194e-19	2
M_3_F_q_Set_7	2.06899	0	0.125	916.972	63.5824	3.06888e-15	3
M_3_F_q_Set_8	2.02647	0	0.0833333	924.42	71.0297	7.41001e-17	3
M_3_F_q_Set_9	2.31804	0	0.0833333	922.098	68.7079	2.36592e-16	3
M_3_F_qp_Set_1	1.98941	0	0	919.916	66.5259	7.04377e-16	3
M_3_F_qp_Set_10	NA	NA	0	936.544	83.1538	1.72627e-19	5
M_3_F_qp_Set_11	1.98941	0	0	907.191	53.8015	4.082e-13	9
M_3_F_qp_Set_2	1.94271	0	0.125	911.333	57.9431	5.14692e-14	3
M_3_F_qp_Set_3	1.92654	0	0.125	932.26	78.8701	1.46995e-18	3
M_3_F_qp_Set_4	NA	NA	0	937.306	83.9162	1.17911e-19	3
M_3_F_qp_Set_5	NA	NA	0	939.037	85.6469	4.96299e-20	2
M_3_F_qp_Set_6	NA	NA	0	938.353	84.9627	6.98751e-20	3
M_3_F_qp_Set_7	1.98941	0	0	902.936	49.5458	3.42772e-12	6
M_3_F_qp_Set_8	1.98941	0	0	921.005	67.6145	4.08712e-16	5
M_3_F_qp_Set_9	1.92983	0	0.125	910.627	57.2369	7.3265e-14	4
M_3_F_lqp_Set_1	1.84561	0	0.0833333	883.547	30.1573	5.56091e-08	5
M_3_F_lqp_Set_10	2.12742	0	0.0833333	904.044	50.6545	1.96896e-12	5
M_3_F_lqp_Set_11	2.00062	0	0.0833333	873.226	19.8361	9.69125e-06	8
M_3_F_lqp_Set_2	2.00618	0	0.0416667	874.664	21.2737	4.72283e-06	4
M_3_F_lqp_Set_3	1.92811	0	0.0833333	908.04	54.6499	2.6709e-13	3
M_3_F_lqp_Set_4	2.12873	0	0.0833333	903.739	50.3491	2.29381e-12	3
M_3_F_lqp_Set_5	1.49338	0	0.125	917.06	63.6704	2.93689e-15	5
M_3_F_lqp_Set_6	2.57762	0	0.166667	916.912	63.5224	3.1624e-15	2
M_3_F_lqp_Set_7	2.00038	0	0.0833333	870.891	17.5013	3.11441e-05	7
M_3_F_lqp_Set_8	1.84564	0	0.0833333	882.151	28.7613	1.1176e-07	6
M_3_F_lqp_Set_9	2.00632	0	0.0416667	874.606	21.2156	4.86214e-06	4
M_3_F_lqpt_Set_1	1.57578	0	0.166667	881.678	28.2877	1.41624e-07	7
M_3_F_lqpt_Set_10	2.09856	0	0.0833333	903.132	49.7421	3.10715e-12	6
M_3_F_lqpt_Set_11	1.82161	0	0.0833333	872.805	19.4148	1.19635e-05	9
M_3_F_lqpt_Set_2	2.28459	0	0.0833333	876.804	23.4136	1.62007e-06	5
M_3_F_lqpt_Set_3	1.52037	0	0.208333	908.454	55.0638	2.17155e-13	4
M_3_F_lqpt_Set_4	2.09498	0	0.0833333	900.609	47.2187	1.09729e-11	4
M_3_F_lqpt_Set_5	1.27358	0	0.0833333	919.371	65.9807	9.25143e-16	7
M_3_F_lqpt_Set_6	2.57846	0	0.166667	916.912	63.5224	3.1624e-15	2
M_3_F_lqpt_Set_7	1.8519	0	0.0833333	872.865	19.4749	1.16096e-05	9
M_3_F_lqpt_Set_8	1.57718	0	0.166667	881.878	28.4885	1.28094e-07	8
M_3_F_lqpt_Set_9	2.25909	0	0.0833333	876.739	23.3487	1.67346e-06	5
M_3_F_lqpth_Set_1	1.66137	0	0.0833333	886.184	32.7936	1.48832e-08	9
M_3_F_lqpth_Set_10	2.02077	0	0.0416667	924.516	71.1258	7.06258e-17	14
M_3_F_lqpth_Set_11	1.65824	0	0.0833333	869.405	16.0149	6.54845e-05	9
M_3_F_lqpth_Set_2	2.00636	0	0.0833333	877.933	24.5435	9.20815e-07	7
M_3_F_lqpth_Set_3	2.00049	0	0.0833333	905.619	52.229	8.96069e-13	4
M_3_F_lqpth_Set_4	2.01637	0	0.0416667	902.757	49.3669	3.74838e-12	6
M_3_F_lqpth_Set_5	1.60708	0	0.125	983.919	130.529	8.90458e-30	23
M_3_F_lqpth_Set_6	2.37222	0	0.125	963.884	110.494	1.99599e-25	17
M_3_F_lqpth_Set_7	1.68079	0	0.0833333	869.441	16.0506	6.4326e-05	9
M_3_F_lqpth_Set_8	1.67372	0	0.0833333	900.28	46.8905	1.29295e-11	14
M_3_F_lqpth_Set_9	2.00698	0	0.0833333	877.879	24.4889	9.46304e-07	7
M_3_F_lqph_Set_1	1.64779	0	0.0833333	886.207	32.8168	1.4711e-08	9
M_3_F_lqph_Set_10	2.01993	0	0.0416667	990.74	137.351	2.94062e-31	25
M_3_F_lqph_Set_11	1.6762	0	0.0833333	875.786	22.3957	2.69505e-06	11
M_3_F_lqph_Set_2	2.00632	0	0.0833333	875.168	21.7784	3.66957e-06	6
M_3_F_lqph_Set_3	2.00071	0	0.0833333	910.715	57.3253	7.0098e-14	6
M_3_F_lqph_Set_4	2.01653	0	0.0416667	902.756	49.3663	3.7495e-12	6
M_3_F_lqph_Set_5	1.64056	0	0.125	1109.37	255.977	5.11816e-57	33
M_3_F_lqph_Set_6	2.37106	0	0.125	963.884	110.494	1.99599e-25	17
M_3_F_lqph_Set_7	1.68956	0	0.0833333	872.557	19.1675	1.35379e-05	10
M_3_F_lqph_Set_8	1.65701	0	0.0833333	913.722	60.3325	1.55844e-14	17
M_3_F_lqph_Set_9	2.00656	0	0.0833333	875.124	21.7338	3.75236e-06	6
M_4_F_lq_Set_1	1.91844	0	0.0833333	884.885	31.4955	2.84821e-08	4
M_4_F_lq_Set_10	2.15755	0	0.0833333	900.549	47.159	1.13053e-11	4
M_4_F_lq_Set_11	2.00102	0	0.0833333	868.161	14.7706	0.00012199	6
M_4_F_lq_Set_2	2.00174	0	0.0833333	869.155	15.7647	7.42127e-05	3
M_4_F_lq_Set_3	2.00067	0	0.166667	903.022	49.6321	3.28292e-12	3
M_4_F_lq_Set_4	2.1552	0	0.0833333	899.888	46.4982	1.57313e-11	3
M_4_F_lq_Set_5	1.59503	0	0.125	913.21	59.8203	2.01337e-14	4
M_4_F_lq_Set_6	2.60548	0	0.166667	915.346	61.9563	6.91972e-15	2
M_4_F_lq_Set_7	2.00083	0	0.0833333	865.772	12.3821	0.000402701	5
M_4_F_lq_Set_8	1.91859	0	0.0833333	889.279	35.8895	3.16539e-09	6
M_4_F_lq_Set_9	2.0018	0	0.0833333	869.066	15.6762	7.75673e-05	3
M_4_F_lp_Set_1	1.76496	0	0.0833333	926.633	73.2435	2.4497e-17	3
M_4_F_lp_Set_10	2.17168	0	0.0833333	911.842	58.4521	3.99039e-14	3
M_4_F_lp_Set_11	2.31484	0	0.0416667	906.446	53.056	5.92594e-13	5
M_4_F_lp_Set_2	2.85078	0	0.0416667	913.873	60.4831	1.44538e-14	2
M_4_F_lp_Set_3	1.55801	0	0.0833333	936.347	82.9571	1.90464e-19	2
M_4_F_lp_Set_4	2.17141	0	0.0833333	909.913	56.5233	1.04678e-13	2
M_4_F_lp_Set_5	1.49671	0	0.125	937.25	83.8599	1.21276e-19	2
M_4_F_lp_Set_6	2.81763	0	0.166667	919.07	65.6803	1.07508e-15	2
M_4_F_lp_Set_7	2.33733	0	0.0416667	910.69	57.3001	7.09858e-14	4
M_4_F_lp_Set_8	1.76369	0	0.0833333	910.129	56.7387	9.39891e-14	4
M_4_F_lp_Set_9	2.68176	0	0.0416667	916.324	62.9342	4.24367e-15	4
M_4_F_q_Set_1	1.94952	0	0.125	928.794	75.4039	8.31742e-18	2
M_4_F_q_Set_10	5.05156	0	0.166667	932.528	79.138	1.28567e-18	3
M_4_F_q_Set_11	2.02714	0	0.0833333	920.363	66.9732	5.63215e-16	4
M_4_F_q_Set_2	2.34247	0	0.0833333	921.126	67.7362	3.84592e-16	2
M_4_F_q_Set_3	2.13023	0	0.0833333	927.631	74.2409	1.48773e-17	2
M_4_F_q_Set_4	NA	NA	0	932.241	78.8515	1.48371e-18	2
M_4_F_q_Set_5	5.05132	0	0.166667	936.16	82.77	2.09146e-19	2
M_4_F_q_Set_6	5.60196	0	0.166667	937.043	83.6528	1.34508e-19	2
M_4_F_q_Set_7	2.04126	0	0.0833333	918.102	64.7121	1.74451e-15	3
M_4_F_q_Set_8	2.02606	0	0.0833333	925.364	71.9742	4.621e-17	3
M_4_F_q_Set_9	2.14686	0	0.0833333	922.904	69.5138	1.58123e-16	3
M_4_F_qp_Set_1	1.97009	0	0.0416667	924.939	71.5488	5.71616e-17	3
M_4_F_qp_Set_10	NA	NA	0	940.331	86.9409	2.59867e-20	4
M_4_F_qp_Set_11	1.97021	0	0.0416667	913.944	60.5536	1.39537e-14	7
M_4_F_qp_Set_2	NA	NA	0	916.711	63.3215	3.49654e-15	3
M_4_F_qp_Set_3	NA	NA	0	933.381	79.9914	8.39123e-19	2
M_4_F_qp_Set_4	NA	NA	0	941.327	87.9366	1.57954e-20	3
M_4_F_qp_Set_5	NA	NA	0	943.854	90.4643	4.46328e-21	1
M_4_F_qp_Set_6	NA	NA	0	938.837	85.447	5.48478e-20	2
M_4_F_qp_Set_7	1.97021	0	0.0416667	911.334	57.9442	5.14403e-14	6
M_4_F_qp_Set_8	1.97009	0	0.0416667	925.845	72.4549	3.63365e-17	4
M_4_F_qp_Set_9	NA	NA	0	917.212	63.8216	2.72302e-15	4
M_4_F_lqp_Set_1	1.76582	0	0.0833333	891.866	38.4764	8.68332e-10	5
M_4_F_lqp_Set_10	2.17315	0	0.0833333	910.176	56.7856	9.18085e-14	4
M_4_F_lqp_Set_11	2.36342	0	0.0416667	872.692	19.3019	1.26584e-05	5
M_4_F_lqp_Set_2	2.85077	0	0.0416667	880.947	27.5571	2.04071e-07	4
M_4_F_lqp_Set_3	1.55791	0	0.0833333	914.06	60.67	1.31648e-14	3
M_4_F_lqp_Set_4	2.17347	0	0.0833333	908.05	54.6596	2.658e-13	3
M_4_F_lqp_Set_5	1.50639	0	0.125	923.132	69.7422	1.41061e-16	3
M_4_F_lqp_Set_6	2.81763	0	0.166667	919.07	65.6803	1.07508e-15	2
M_4_F_lqp_Set_7	2.35146	0	0.0416667	872.758	19.3683	1.22451e-05	5
M_4_F_lqp_Set_8	1.76307	0	0.0833333	892.062	38.6724	7.87284e-10	6
M_4_F_lqp_Set_9	2.71466	0	0.0416667	880.893	27.5026	2.0971e-07	4
M_4_F_lqpt_Set_1	1.71233	0	0.0833333	888.543	35.1526	4.57539e-09	6
M_4_F_lqpt_Set_10	2.11858	0	0.0833333	908.378	54.988	2.25546e-13	5
M_4_F_lqpt_Set_11	2.04159	0	0.0833333	876.541	23.1514	1.84702e-06	7
M_4_F_lqpt_Set_2	2.5461	0	0.0833333	883.268	29.8783	6.39355e-08	5
M_4_F_lqpt_Set_3	1.2785	0	0.0833333	914.491	61.1007	1.0614e-14	4
M_4_F_lqpt_Set_4	2.11813	0	0.0833333	905.955	52.5655	7.57297e-13	4
M_4_F_lqpt_Set_5	1.27358	0	0.0833333	924.611	71.2211	6.73386e-17	5
M_4_F_lqpt_Set_6	2.81763	0	0.166667	919.07	65.6803	1.07508e-15	2
M_4_F_lqpt_Set_7	2.04236	0	0.0833333	876.607	23.2169	1.78749e-06	7
M_4_F_lqpt_Set_8	1.7195	0	0.0833333	890.188	36.7978	2.00993e-09	7
M_4_F_lqpt_Set_9	2.19269	0	0.0833333	883.211	29.8212	6.57859e-08	5
M_4_F_lqpth_Set_1	1.52611	0	0.0833333	886.271	32.8811	1.42456e-08	7
M_4_F_lqpth_Set_10	2.015	0	0.0416667	927.027	73.6373	2.01186e-17	13
M_4_F_lqpth_Set_11	1.63897	0	0.0833333	873.041	19.6514	1.06286e-05	8
M_4_F_lqpth_Set_2	1.99757	0	0.0833333	879.92	26.5302	3.4101e-07	6
M_4_F_lqpth_Set_3	1.37541	0	0.0833333	913.025	59.6348	2.20897e-14	5
M_4_F_lqpth_Set_4	2.0119	0	0.0416667	908.407	55.0174	2.22251e-13	7
M_4_F_lqpth_Set_5	1.46443	0	0.125	967.392	114.002	3.45586e-26	19
M_4_F_lqpth_Set_6	2.2377	0	0.166667	938.476	85.0856	6.57084e-20	10
M_4_F_lqpth_Set_7	1.66171	0	0.0833333	873.09	19.7	1.03737e-05	8
M_4_F_lqpth_Set_8	1.52452	0	0.0833333	900.35	46.9605	1.24852e-11	12
M_4_F_lqpth_Set_9	1.99754	0	0.0833333	879.877	26.4867	3.48514e-07	6
M_4_F_lqph_Set_1	1.53257	0	0.0833333	889.165	35.7755	3.35101e-09	8
M_4_F_lqph_Set_10	2.01512	0	0.0416667	927.027	73.6373	2.01186e-17	13
M_4_F_lqph_Set_11	1.65663	0	0.0833333	873.037	19.6466	1.06542e-05	8
M_4_F_lqph_Set_2	1.99764	0	0.0833333	879.89	26.5005	3.46114e-07	6
M_4_F_lqph_Set_3	1.37539	0	0.0833333	910.54	57.1505	7.64984e-14	4
M_4_F_lqph_Set_4	2.01092	0	0.0416667	908.407	55.0174	2.22251e-13	7
M_4_F_lqph_Set_5	1.47197	0	0.125	967.392	114.002	3.45586e-26	19
M_4_F_lqph_Set_6	2.23633	0	0.166667	938.476	85.0856	6.57084e-20	10
M_4_F_lqph_Set_7	1.63592	0	0.0833333	873.085	19.6949	1.04001e-05	8
M_4_F_lqph_Set_8	1.52202	0	0.0833333	907.956	54.5662	2.78499e-13	14
M_4_F_lqph_Set_9	1.99764	0	0.0833333	879.847	26.4571	3.53713e-07	6
M_5_F_lq_Set_1	1.89643	0	0.125	887.271	33.8809	8.64129e-09	4
M_5_F_lq_Set_10	2.1355	0	0.0833333	902.275	48.8853	4.76893e-12	4
M_5_F_lq_Set_11	2.0016	0	0.0833333	865.393	12.0035	0.000486627	4
M_5_F_lq_Set_2	2.00203	0	0.0416667	871.08	17.6901	2.83383e-05	3
M_5_F_lq_Set_3	1.95597	0	0.125	904.956	51.5665	1.24799e-12	3
M_5_F_lq_Set_4	2.13561	0	0.0833333	901.393	48.0029	7.41347e-12	3
M_5_F_lq_Set_5	1.47525	0	0.125	915.27	61.88	7.18884e-15	4
M_5_F_lq_Set_6	2.55673	0	0.166667	915.914	62.5242	5.20931e-15	2
M_5_F_lq_Set_7	2.00157	0	0.0833333	865.499	12.1089	0.000461653	4
M_5_F_lq_Set_8	1.8964	0	0.125	889.425	36.0348	2.94355e-09	5
M_5_F_lq_Set_9	2.00219	0	0.0416667	870.998	17.6079	2.95277e-05	3
M_5_F_lp_Set_1	1.60509	0	0.0833333	927.917	74.5267	1.28964e-17	3
M_5_F_lp_Set_10	1.37826	0	0.125	912.069	58.6789	3.56268e-14	2
M_5_F_lp_Set_11	1.60516	0	0.0833333	912.203	58.8128	3.33184e-14	5
M_5_F_lp_Set_2	1.55366	0	0.0833333	915.59	62.2004	6.1247e-15	2
M_5_F_lp_Set_3	1.55354	0	0.0833333	939.5	86.1104	3.93631e-20	2
M_5_F_lp_Set_4	1.37835	0	0.125	912.108	58.7179	3.49376e-14	2
M_5_F_lp_Set_5	1.37804	0	0.125	940.189	86.7988	2.79003e-20	2
M_5_F_lp_Set_6	NA	NA	0	918.775	65.3849	1.24619e-15	1
M_5_F_lp_Set_7	1.60585	0	0.0833333	912.861	59.4715	2.39693e-14	4
M_5_F_lp_Set_8	1.60544	0	0.0833333	916.695	63.3051	3.52527e-15	4
M_5_F_lp_Set_9	1.55368	0	0.0833333	917.626	64.2363	2.21303e-15	3
M_5_F_q_Set_1	1.93541	0	0.125	929.746	76.3559	5.16725e-18	2
M_5_F_q_Set_10	NA	NA	0	933.709	80.3188	7.12393e-19	3
M_5_F_q_Set_11	1.93703	0	0.125	921.82	68.4301	2.71845e-16	4
M_5_F_q_Set_2	2.00801	0	0.125	922.216	68.8261	2.23011e-16	2
M_5_F_q_Set_3	1.98176	0	0.125	928.496	75.1059	9.65379e-18	2
M_5_F_q_Set_4	NA	NA	0	933.351	79.9614	8.51768e-19	2
M_5_F_q_Set_5	NA	NA	0	937.234	83.8444	1.22223e-19	2
M_5_F_q_Set_6	NA	NA	0	937.613	84.2234	1.01121e-19	2
M_5_F_q_Set_7	1.93664	0	0.125	919.57	66.1804	8.37205e-16	3
M_5_F_q_Set_8	1.93482	0	0.125	926.583	73.1929	2.51241e-17	3
M_5_F_q_Set_9	1.97936	0	0.125	923.96	70.5703	9.32362e-17	3
M_5_F_qp_Set_1	NA	NA	0	927.628	74.2384	1.48962e-17	2
M_5_F_qp_Set_10	NA	NA	0	941.816	88.4257	1.23688e-20	2
M_5_F_qp_Set_11	NA	NA	0	915.315	61.9249	7.02938e-15	4
M_5_F_qp_Set_2	NA	NA	0	924.204	70.8143	8.25295e-17	3
M_5_F_qp_Set_3	NA	NA	0	938.535	85.1447	6.37964e-20	2
M_5_F_qp_Set_4	NA	NA	0	947.165	93.7746	8.52757e-22	3
M_5_F_qp_Set_5	NA	NA	0	946.913	93.5235	9.66839e-22	1
M_5_F_qp_Set_6	NA	NA	0	944.002	90.6124	4.14465e-21	2
M_5_F_qp_Set_7	NA	NA	0	915.324	61.9342	6.99652e-15	4
M_5_F_qp_Set_8	NA	NA	0	927.621	74.2306	1.49543e-17	2
M_5_F_qp_Set_9	NA	NA	0	924.196	70.8065	8.28502e-17	3
M_5_F_lqp_Set_1	1.60551	0	0.0833333	900.996	47.6065	9.03881e-12	5
M_5_F_lqp_Set_10	1.3785	0	0.125	913.02	59.6302	2.2141e-14	3
M_5_F_lqp_Set_11	1.60544	0	0.0833333	880.45	27.0601	2.61633e-07	5
M_5_F_lqp_Set_2	1.5537	0	0.0833333	888.368	34.9784	4.99197e-09	4
M_5_F_lqp_Set_3	1.55355	0	0.0833333	917.414	64.0239	2.46106e-15	2
M_5_F_lqp_Set_4	1.37872	0	0.125	913.059	59.6687	2.17183e-14	3
M_5_F_lqp_Set_5	1.37816	0	0.125	930.962	77.5724	2.81249e-18	3
M_5_F_lqp_Set_6	NA	NA	0	918.775	65.3849	1.24619e-15	1
M_5_F_lqp_Set_7	1.60603	0	0.0833333	880.504	27.1145	2.54623e-07	5
M_5_F_lqp_Set_8	1.60535	0	0.0833333	903.584	50.1945	2.47821e-12	6
M_5_F_lqp_Set_9	1.55367	0	0.0833333	888.319	34.9291	5.11643e-09	4
M_5_F_lqpt_Set_1	1.27871	0	0.0833333	898.746	45.3565	2.78416e-11	6
M_5_F_lqpt_Set_10	1.27379	0	0.0833333	912.181	58.7914	3.36781e-14	4
M_5_F_lqpt_Set_11	1.27897	0	0.0833333	882.627	29.237	8.81032e-08	6
M_5_F_lqpt_Set_2	1.2785	0	0.0833333	888.268	34.8782	5.24847e-09	4
M_5_F_lqpt_Set_3	1.2785	0	0.0833333	914.826	61.4365	8.97334e-15	2
M_5_F_lqpt_Set_4	1.27369	0	0.0833333	912.218	58.8278	3.30693e-14	4
M_5_F_lqpt_Set_5	1.27358	0	0.0833333	933.013	79.6231	1.00878e-18	5
M_5_F_lqpt_Set_6	NA	NA	0	918.775	65.3849	1.24619e-15	1
M_5_F_lqpt_Set_7	1.27887	0	0.0833333	882.683	29.2928	8.56788e-08	6
M_5_F_lqpt_Set_8	1.27882	0	0.0833333	898.733	45.3435	2.80233e-11	6
M_5_F_lqpt_Set_9	1.27855	0	0.0833333	888.221	34.8309	5.37401e-09	4
M_5_F_lqpth_Set_1	1.52416	0	0.0833333	888.943	35.5527	3.74587e-09	6
M_5_F_lqpth_Set_10	1.84552	0	0.0416667	905.397	52.0073	1.0011e-12	5
M_5_F_lqpth_Set_11	1.61444	0	0.0833333	879.416	26.0258	4.3884e-07	8
M_5_F_lqpth_Set_2	1.79718	0	0.0833333	882.238	28.8481	1.07016e-07	5
M_5_F_lqpth_Set_3	1.3754	0	0.0833333	913.835	60.4453	1.473e-14	4
M_5_F_lqpth_Set_4	1.84524	0	0.0416667	905.431	52.0413	9.84263e-13	5
M_5_F_lqpth_Set_5	1.34468	0	0.125	967.137	113.747	3.92463e-26	18
M_5_F_lqpth_Set_6	1.97767	0	0.166667	929.989	76.5989	4.57593e-18	6
M_5_F_lqpth_Set_7	1.62078	0	0.0833333	879.457	26.0671	4.29864e-07	8
M_5_F_lqpth_Set_8	1.52069	0	0.0833333	886.327	32.9366	1.38558e-08	5
M_5_F_lqpth_Set_9	1.7972	0	0.0833333	882.201	28.811	1.09016e-07	5
M_5_F_lqph_Set_1	1.52818	0	0.0833333	891.666	38.2765	9.59589e-10	7
M_5_F_lqph_Set_10	1.84565	0	0.0416667	905.397	52.0073	1.0011e-12	5
M_5_F_lqph_Set_11	1.6141	0	0.0833333	879.421	26.0307	4.37756e-07	8
M_5_F_lqph_Set_2	1.79703	0	0.0833333	884.794	31.4036	2.98217e-08	6
M_5_F_lqph_Set_3	1.37538	0	0.0833333	921.633	68.2432	2.98467e-16	7
M_5_F_lqph_Set_4	1.84543	0	0.0416667	905.431	52.0413	9.84263e-13	5
M_5_F_lqph_Set_5	1.34215	0	0.125	967.137	113.747	3.92463e-26	18
M_5_F_lqph_Set_6	1.97765	0	0.166667	929.989	76.5989	4.57593e-18	6
M_5_F_lqph_Set_7	1.60978	0	0.0833333	879.462	26.0721	4.28782e-07	8
M_5_F_lqph_Set_8	1.53118	0	0.0833333	891.653	38.2629	9.66139e-10	7
M_5_F_lqph_Set_9	1.79708	0	0.0833333	884.756	31.3665	3.03802e-08	6
M_6_F_lq_Set_1	1.8764	0	0.125	889.987	36.5967	2.22254e-09	4
M_6_F_lq_Set_10	2.12915	0	0.0833333	904.259	50.8691	1.76867e-12	4
M_6_F_lq_Set_11	2.00218	0	0.125	867.631	14.2407	0.000159	4
M_6_F_lq_Set_2	2.00622	0	0.0416667	873.261	19.8708	9.52427e-06	3
M_6_F_lq_Set_3	1.92139	0	0.0833333	907.187	53.7973	4.09071e-13	3
M_6_F_lq_Set_4	2.12839	0	0.0833333	903.098	49.7082	3.16037e-12	3
M_6_F_lq_Set_5	1.49428	0	0.125	917.714	64.3237	2.11846e-15	4
M_6_F_lq_Set_6	2.55297	0	0.166667	916.627	63.2367	3.64804e-15	2
M_6_F_lq_Set_7	2.00207	0	0.125	867.727	14.3371	0.000151521	4
M_6_F_lq_Set_8	1.8765	0	0.125	889.97	36.5803	2.24088e-09	4
M_6_F_lq_Set_9	2.00588	0	0.0416667	873.185	19.7948	9.89315e-06	3
M_6_F_lp_Set_1	NA	NA	0	929.584	76.1941	5.60255e-18	3
M_6_F_lp_Set_10	NA	NA	0	914.819	61.4291	9.00671e-15	2
M_6_F_lp_Set_11	NA	NA	0	915.603	62.2134	6.08486e-15	4
M_6_F_lp_Set_2	NA	NA	0	917.761	64.3706	2.06936e-15	2
M_6_F_lp_Set_3	NA	NA	0	938.828	85.4377	5.51019e-20	1
M_6_F_lp_Set_4	NA	NA	0	914.851	61.4614	8.86263e-15	2
M_6_F_lp_Set_5	NA	NA	0	939.012	85.6219	5.02547e-20	1
M_6_F_lp_Set_6	NA	NA	0	920.768	67.3776	4.60119e-16	1
M_6_F_lp_Set_7	NA	NA	0	915.628	62.2385	6.00904e-15	4
M_6_F_lp_Set_8	NA	NA	0	925.199	71.8091	5.0186e-17	4
M_6_F_lp_Set_9	NA	NA	0	917.738	64.3477	2.09312e-15	2
M_6_F_q_Set_1	1.8988	0	0.125	930.869	77.479	2.947e-18	2
M_6_F_q_Set_10	NA	NA	0	935.188	81.7984	3.39961e-19	3
M_6_F_q_Set_11	1.89944	0	0.125	923.627	70.2371	1.1014e-16	4
M_6_F_q_Set_2	1.93389	0	0.125	923.586	70.196	1.12426e-16	2
M_6_F_q_Set_3	1.91987	0	0.125	929.578	76.1877	5.62058e-18	2
M_6_F_q_Set_4	NA	NA	0	934.698	81.3078	4.34483e-19	2
M_6_F_q_Set_5	NA	NA	0	938.53	85.1399	6.39504e-20	2
M_6_F_q_Set_6	NA	NA	0	938.384	84.9937	6.87992e-20	2
M_6_F_q_Set_7	1.89988	0	0.125	921.399	68.0088	3.3559e-16	3
M_6_F_q_Set_8	1.8989	0	0.125	928.093	74.7026	1.18102e-17	3
M_6_F_q_Set_9	1.92158	0	0.125	925.302	71.9124	4.76591e-17	3
M_6_F_qp_Set_1	NA	NA	0	931.559	78.1691	2.08704e-18	2
M_6_F_qp_Set_10	NA	NA	0	945.525	92.1346	1.93621e-21	1
M_6_F_qp_Set_11	NA	NA	0	924.349	70.9595	7.67497e-17	4
M_6_F_qp_Set_2	NA	NA	0	928.895	75.5046	7.9087e-18	2
M_6_F_qp_Set_3	NA	NA	0	939.126	85.7358	4.74713e-20	1
M_6_F_qp_Set_4	NA	NA	0	945.532	92.142	1.92908e-21	1
M_6_F_qp_Set_5	NA	NA	0	944.979	91.589	2.54353e-21	0
M_6_F_qp_Set_6	NA	NA	0	944.979	91.589	2.54353e-21	0
M_6_F_qp_Set_7	NA	NA	0	924.357	70.9674	7.64449e-17	4
M_6_F_qp_Set_8	NA	NA	0	931.552	78.1617	2.09478e-18	2
M_6_F_qp_Set_9	NA	NA	0	928.887	75.4972	7.93821e-18	2
M_6_F_lqp_Set_1	NA	NA	0	910.988	57.5977	6.11707e-14	5
M_6_F_lqp_Set_10	NA	NA	0	914.819	61.4291	9.00671e-15	2
M_6_F_lqp_Set_11	NA	NA	0	889.007	35.6171	3.62728e-09	5
M_6_F_lqp_Set_2	NA	NA	0	893.36	39.9696	4.11568e-10	3
M_6_F_lqp_Set_3	NA	NA	0	922.539	69.1486	1.89806e-16	2
M_6_F_lqp_Set_4	NA	NA	0	914.851	61.4614	8.86263e-15	2
M_6_F_lqp_Set_5	NA	NA	0	935.204	81.8145	3.37231e-19	2
M_6_F_lqp_Set_6	NA	NA	0	920.768	67.3776	4.60119e-16	1
M_6_F_lqp_Set_7	NA	NA	0	889.051	35.6606	3.54916e-09	5
M_6_F_lqp_Set_8	NA	NA	0	910.977	57.5874	6.14856e-14	5
M_6_F_lqp_Set_9	NA	NA	0	893.32	39.9304	4.19708e-10	3
M_6_F_lqpt_Set_1	NA	NA	0	905.676	52.286	8.70891e-13	5
M_6_F_lqpt_Set_10	NA	NA	0	915.992	62.6019	5.01063e-15	3
M_6_F_lqpt_Set_11	NA	NA	0	891.156	37.766	1.23866e-09	6
M_6_F_lqpt_Set_2	NA	NA	0	895.609	42.2193	1.33636e-10	4
M_6_F_lqpt_Set_3	NA	NA	0	919.322	65.9316	9.48111e-16	2
M_6_F_lqpt_Set_4	NA	NA	0	916.024	62.6336	4.93196e-15	3
M_6_F_lqpt_Set_5	NA	NA	0	935.319	81.9292	3.18444e-19	3
M_6_F_lqpt_Set_6	NA	NA	0	920.768	67.3776	4.60119e-16	1
M_6_F_lqpt_Set_7	NA	NA	0	891.201	37.8105	1.21136e-09	6
M_6_F_lqpt_Set_8	NA	NA	0	905.664	52.2742	8.76073e-13	5
M_6_F_lqpt_Set_9	NA	NA	0	895.568	42.1782	1.36411e-10	4
M_6_F_lqpth_Set_1	1.53298	0	0.0833333	894.389	40.9987	2.46026e-10	6
M_6_F_lqpth_Set_10	1.84837	0	0.125	908.134	54.7438	2.54842e-13	5
M_6_F_lqpth_Set_11	1.57534	0	0.0833333	883.291	29.9012	6.32084e-08	7
M_6_F_lqpth_Set_2	1.80613	0	0.0833333	893.17	39.7803	4.52428e-10	7
M_6_F_lqpth_Set_3	1.39455	0	0.0833333	917.415	64.0253	2.45926e-15	4
M_6_F_lqpth_Set_4	1.84778	0	0.125	908.163	54.7731	2.51136e-13	5
M_6_F_lqpth_Set_5	1.34803	0	0.125	921.094	67.704	3.90842e-16	3
M_6_F_lqpth_Set_6	1.58013	0	0.166667	920.768	67.3776	4.60119e-16	1
M_6_F_lqpth_Set_7	1.58181	0	0.0833333	883.323	29.9329	6.2214e-08	7
M_6_F_lqpth_Set_8	1.53263	0	0.0833333	894.376	40.9858	2.47608e-10	6
M_6_F_lqpth_Set_9	1.80621	0	0.0833333	893.14	39.7497	4.59395e-10	7
M_6_F_lqph_Set_1	1.54029	0	0.0833333	894.361	40.9706	2.49507e-10	6
M_6_F_lqph_Set_10	1.84839	0	0.125	908.134	54.7438	2.54842e-13	5
M_6_F_lqph_Set_11	1.59128	0	0.0833333	883.252	29.8618	6.44652e-08	7
M_6_F_lqph_Set_2	1.80612	0	0.0833333	890.572	37.182	1.65865e-09	6
M_6_F_lqph_Set_3	1.39457	0	0.0833333	917.396	64.0059	2.48327e-15	4
M_6_F_lqph_Set_4	1.84764	0	0.125	908.163	54.7731	2.51136e-13	5
M_6_F_lqph_Set_5	1.34166	0	0.125	921.094	67.704	3.90842e-16	3
M_6_F_lqph_Set_6	1.58013	0	0.166667	920.768	67.3776	4.60119e-16	1
M_6_F_lqph_Set_7	1.60065	0	0.0833333	883.286	29.8963	6.33613e-08	7
M_6_F_lqph_Set_8	1.53226	0	0.0833333	894.348	40.9578	2.51108e-10	6
M_6_F_lqph_Set_9	1.80612	0	0.0833333	890.542	37.1516	1.68406e-09	6

## Sheet: 50km-RawVariables_1
Model	Mean_AUC_ratio	pval_pROC	Omission_rate_at_5%	AICc	delta_AICc	W_AICc	N_parameters
M_0.1_F_lq_Set_1	1.95695	0	0.0833333	871.65	25.5121	2.06562e-07	4
M_0.1_F_lq_Set_10	2.0244	0	0.0833333	902.659	56.5207	3.81627e-14	4
M_0.1_F_lq_Set_11	1.85084	0	0.166667	895.433	49.2949	1.41477e-12	4
M_0.1_F_lq_Set_12	1.93193	0	0.0833333	899.06	52.9218	2.30734e-13	3
M_0.1_F_lq_Set_13	2.03944	0	0.0416667	855.441	9.30305	0.000683612	4
M_0.1_F_lq_Set_14	2.03252	0	0.0416667	856.424	10.2859	0.000418212	4
M_0.1_F_lq_Set_15	1.71565	0	0.0833333	886.067	39.9294	1.52893e-10	4
M_0.1_F_lq_Set_16	1.98301	0	0.0833333	863.55	17.4123	1.18553e-05	6
M_0.1_F_lq_Set_17	1.98437	0	0.0416667	853.146	7.00793	0.00215372	5
M_0.1_F_lq_Set_18	1.97672	0	0.0416667	871.638	25.4999	2.07827e-07	6
M_0.1_F_lq_Set_19	1.9639	0	0.0833333	866.804	20.6658	2.33029e-06	6
M_0.1_F_lq_Set_2	1.99723	0	0.0833333	888.55	42.4118	4.41906e-11	4
M_0.1_F_lq_Set_20	1.99876	0	0.0416667	856.245	10.1072	0.000457284	6
M_0.1_F_lq_Set_21	2.2051	0	0.25	875.953	29.8149	2.40282e-08	5
M_0.1_F_lq_Set_22	1.7388	0	0.125	855.096	8.9576	0.0008125	6
M_0.1_F_lq_Set_23	1.9856	0	0.0416667	850.188	4.04961	0.00945323	6
M_0.1_F_lq_Set_24	1.97214	0	0.0833333	849.883	3.74539	0.0110063	6
M_0.1_F_lq_Set_25	1.74393	0	0.0833333	854.583	8.44497	0.00104988	6
M_0.1_F_lq_Set_26	2.11381	0	0	862.23	16.0924	2.29362e-05	5
M_0.1_F_lq_Set_27	1.74366	0	0.125	881.235	35.0973	1.71262e-09	5
M_0.1_F_lq_Set_28	2.01672	0	0.208333	896.853	50.7153	6.9543e-13	4
M_0.1_F_lq_Set_29	2.09774	0	0.0416667	859.357	13.2189	9.64926e-05	6
M_0.1_F_lq_Set_3	1.89936	0	0.0833333	853.99	7.85246	0.00141189	4
M_0.1_F_lq_Set_30	2.09941	0	0.0833333	860.878	14.7398	4.5105e-05	6
M_0.1_F_lq_Set_31	1.6989	0	0.0416667	887.626	41.4877	7.01476e-11	6
M_0.1_F_lq_Set_32	2.17445	0	0.0833333	852.008	5.86977	0.00380485	6
M_0.1_F_lq_Set_33	2.23188	0	0.0416667	853.573	7.43476	0.00173982	6
M_0.1_F_lq_Set_34	1.77814	0	0.0833333	875.034	28.8963	3.80348e-08	6
M_0.1_F_lq_Set_35	2.06373	0	0.0416667	855.444	9.30644	0.000682457	4
M_0.1_F_lq_Set_36	1.89081	0	0	853.596	7.458	0.00171972	8
M_0.1_F_lq_Set_37	2.17781	0	0.0833333	860.697	14.5587	4.93804e-05	7
M_0.1_F_lq_Set_38	1.7824	0	0.0833333	857.237	11.0992	0.000278477	8
M_0.1_F_lq_Set_39	1.99218	0	0.0416667	852.306	6.16841	0.0032771	8
M_0.1_F_lq_Set_4	2.10456	0	0.0833333	882.869	36.731	7.56669e-10	4
M_0.1_F_lq_Set_40	1.98931	0	0.0416667	852.033	5.89479	0.00375754	8
M_0.1_F_lq_Set_41	1.76806	0	0.0416667	856.003	9.86524	0.000516098	8
M_0.1_F_lq_Set_42	2.20786	0	0.0833333	847.338	1.20005	0.0392966	8
M_0.1_F_lq_Set_43	1.99415	0	0.0833333	847.629	1.49094	0.0339773	8
M_0.1_F_lq_Set_44	1.84033	0	0.125	850.077	3.93865	0.00999251	8
M_0.1_F_lq_Set_45	1.98947	0	0.0416667	850.288	4.14997	0.00899059	6
M_0.1_F_lq_Set_46	2.17749	0	0.0833333	854.459	8.32133	0.00111684	7
M_0.1_F_lq_Set_47	2.20808	0	0.0833333	855.966	9.82769	0.00052588	7
M_0.1_F_lq_Set_48	2.0993	0	0.0416667	875.691	29.5534	2.73841e-08	8
M_0.1_F_lq_Set_49	2.08686	0	0.0416667	862.115	15.9768	2.43014e-05	7
M_0.1_F_lq_Set_5	1.97022	0	0.0416667	864.435	18.2969	7.61753e-06	4
M_0.1_F_lq_Set_50	2.189	0	0.0833333	854.829	8.69082	0.00092844	7
M_0.1_F_lq_Set_51	2.24446	0	0.0416667	851.211	5.07277	0.00566766	10
M_0.1_F_lq_Set_52	1.77344	0	0.0833333	850.531	4.39316	0.00796122	10
M_0.1_F_lq_Set_53	1.88047	0	0.0416667	852.453	6.3148	0.00304579	10
M_0.1_F_lq_Set_54	1.99483	0	0.0416667	858.234	12.096	0.000169171	10
M_0.1_F_lq_Set_55	2.20477	0	0.0833333	850.333	4.1954	0.00878866	9
M_0.1_F_lq_Set_56	2.19704	0	0.0833333	857.414	11.2761	0.000254905	8
M_0.1_F_lq_Set_57	2.23055	0	0.0416667	854.2	8.06168	0.00127166	11
M_0.1_F_lq_Set_6	3.01284	0	0.291667	910.075	63.9373	9.35712e-16	4
M_0.1_F_lq_Set_7	2.00637	0	0.0416667	869.063	22.9251	7.5303e-07	4
M_0.1_F_lq_Set_8	1.62589	0	0.0833333	894.724	48.5862	2.01641e-12	4
M_0.1_F_lq_Set_9	2.00155	0	0.0833333	914.55	68.412	9.9875e-17	4
M_0.1_F_lp_Set_1	1.93103	0	0.0416667	890.168	44.0299	1.96773e-11	3
M_0.1_F_lp_Set_10	54.2024	0	0.208333	946.442	100.304	1.18626e-23	3
M_0.1_F_lp_Set_11	2.02762	0	0.208333	929.022	82.8843	7.19205e-20	3
M_0.1_F_lp_Set_12	1.91879	0	0.0416667	900.161	54.0231	1.33038e-13	3
M_0.1_F_lp_Set_13	1.96825	0	0.0416667	875.225	29.0867	3.45824e-08	3
M_0.1_F_lp_Set_14	1.73833	0	0.0416667	911.992	65.8538	3.58905e-16	3
M_0.1_F_lp_Set_15	1.69858	0	0.0416667	911.967	65.8294	3.63302e-16	3
M_0.1_F_lp_Set_16	1.99959	0	0.166667	871.304	25.1663	2.45554e-07	5
M_0.1_F_lp_Set_17	1.99019	0	0.0416667	860.994	14.8559	4.25618e-05	5
M_0.1_F_lp_Set_18	1.95517	0	0.0416667	881.644	35.5064	1.39579e-09	5
M_0.1_F_lp_Set_19	1.92647	0	0.0416667	893.268	47.1303	4.17559e-12	6
M_0.1_F_lp_Set_2	6.55794	0	0.166667	937.231	91.093	1.18674e-21	2
M_0.1_F_lp_Set_20	1.9965	0	0.0416667	872.45	26.3121	1.38468e-07	5
M_0.1_F_lp_Set_21	2.07542	0	0.208333	883.77	37.6324	4.82143e-10	5
M_0.1_F_lp_Set_22	2.01751	0	0.0416667	900.199	54.0613	1.30524e-13	6
M_0.1_F_lp_Set_23	2.01034	0	0.0416667	859.479	13.341	9.07776e-05	6
M_0.1_F_lp_Set_24	1.99435	0	0.0416667	856.857	10.7191	0.000336763	6
M_0.1_F_lp_Set_25	2.00143	0	0.0416667	861.46	15.3215	3.37221e-05	6
M_0.1_F_lp_Set_26	1.99384	0	0	890.051	43.9129	2.08627e-11	5
M_0.1_F_lp_Set_27	2.00367	0	0.208333	891.429	45.2912	1.04732e-11	4
M_0.1_F_lp_Set_28	2.0161	0	0.125	901.227	55.0888	7.80832e-14	5
M_0.1_F_lp_Set_29	1.97689	0	0.0416667	878.799	32.6612	5.78962e-09	6
M_0.1_F_lp_Set_3	1.99444	0	0	869.741	23.6032	5.36499e-07	3
M_0.1_F_lp_Set_30	2.00096	0	0.0416667	879.373	33.2347	4.34632e-09	6
M_0.1_F_lp_Set_31	2.00499	0	0.0416667	884.881	38.7435	2.76632e-10	5
M_0.1_F_lp_Set_32	2.0013	0	0.0416667	872.25	26.1117	1.53062e-07	5
M_0.1_F_lp_Set_33	1.85336	0	0.0416667	895.684	49.5457	1.24806e-12	4
M_0.1_F_lp_Set_34	1.86228	0	0.0833333	897.605	51.4672	4.77515e-13	6
M_0.1_F_lp_Set_35	2.01618	0	0.0416667	859.197	13.0586	0.000104546	5
M_0.1_F_lp_Set_36	1.99818	0	0.0833333	858.16	12.0224	0.000175511	8
M_0.1_F_lp_Set_37	2.03597	0	0.0833333	866.848	20.7097	2.27979e-06	6
M_0.1_F_lp_Set_38	2.00605	0	0.166667	876.523	30.3854	1.80653e-08	8
M_0.1_F_lp_Set_39	2.0085	0	0.0416667	862.422	16.2836	2.08447e-05	7
M_0.1_F_lp_Set_4	2.01289	0	0.0833333	891.551	45.4131	9.85386e-12	3
M_0.1_F_lp_Set_40	1.99725	0	0.0416667	862.7	16.562	1.81366e-05	8
M_0.1_F_lp_Set_41	2.0021	0	0.0416667	867.818	21.6796	1.4037e-06	10
M_0.1_F_lp_Set_42	2.03566	0	0.0416667	857.076	10.9382	0.000301812	8
M_0.1_F_lp_Set_43	2.02564	0	0.0416667	854.773	8.63467	0.000954878	8
M_0.1_F_lp_Set_44	2.0802	0	0.0833333	862.499	16.3607	2.00573e-05	9
M_0.1_F_lp_Set_45	2.03599	0	0.0416667	859.849	13.7108	7.5452e-05	7
M_0.1_F_lp_Set_46	2.00924	0	0.0833333	869.895	23.7567	4.96876e-07	8
M_0.1_F_lp_Set_47	2.00241	0	0.125	874.202	28.0638	5.76722e-08	10
M_0.1_F_lp_Set_48	2.00279	0	0.125	871.445	25.3069	2.28891e-07	8
M_0.1_F_lp_Set_49	2.01473	0	0.0416667	866.095	19.9573	3.32105e-06	8
M_0.1_F_lp_Set_5	1.65031	0	0.0416667	913.348	67.2097	1.82194e-16	3
M_0.1_F_lp_Set_50	2.05572	0	0.0416667	857.251	11.1131	0.000276537	7
M_0.1_F_lp_Set_51	2.02172	0	0.0833333	859.756	13.6176	7.90533e-05	9
M_0.1_F_lp_Set_52	2.01029	0	0.125	863.753	17.6147	1.07144e-05	11
M_0.1_F_lp_Set_53	2.08394	0	0.0833333	874.483	28.3446	5.01182e-08	13
M_0.1_F_lp_Set_54	2.04403	0	0.0416667	868.804	22.666	8.57198e-07	11
M_0.1_F_lp_Set_55	2.04673	0	0.0833333	864.048	17.91	9.24362e-06	11
M_0.1_F_lp_Set_56	2.05051	0	0.125	869.163	23.0248	7.16409e-07	11
M_0.1_F_lp_Set_57	2.07016	0	0.0833333	872.94	26.8022	1.08374e-07	14
M_0.1_F_lp_Set_6	8.03799	0	0.0416667	926.899	80.7608	2.07945e-19	3
M_0.1_F_lp_Set_7	1.98412	0	0.0416667	892.378	46.2396	6.51847e-12	3
M_0.1_F_lp_Set_8	2.00133	0	0.0833333	908.646	62.5075	1.91251e-15	3
M_0.1_F_lp_Set_9	1.71643	0	0.0416667	915.832	69.6944	5.26018e-17	3
M_0.1_F_q_Set_1	1.68141	0	0.166667	939.265	93.1271	4.29194e-22	2
M_0.1_F_q_Set_10	8.14921	0	0.166667	942.142	96.0045	1.01821e-22	2
M_0.1_F_q_Set_11	1.81993	0	0.125	894.041	47.9028	2.83779e-12	2
M_0.1_F_q_Set_12	1.99639	0	0.0416667	897.416	51.2775	5.25015e-13	2
M_0.1_F_q_Set_13	1.76459	0	0.0416667	881.287	35.1491	1.66882e-09	2
M_0.1_F_q_Set_14	1.75562	0	0.0416667	907.077	60.9391	4.18964e-15	2
M_0.1_F_q_Set_15	1.7113	0	0.0416667	901.44	55.3016	7.02025e-14	2
M_0.1_F_q_Set_16	6.09341	0	0.0416667	936.972	90.8336	1.35106e-21	3
M_0.1_F_q_Set_17	1.836	0	0	911.253	65.1149	5.19298e-16	3
M_0.1_F_q_Set_18	1.76807	0	0.0416667	892.626	46.4879	5.75738e-12	3
M_0.1_F_q_Set_19	1.73086	0	0.0416667	914.271	68.1332	1.14817e-16	3
M_0.1_F_q_Set_2	7.17861	0	0.125	942.475	96.337	8.62229e-23	2
M_0.1_F_q_Set_20	2.07251	0	0	904.356	58.2179	1.63336e-14	3
M_0.1_F_q_Set_21	1.7782	0	0.208333	891.977	45.8388	7.96459e-12	3
M_0.1_F_q_Set_22	1.89202	0	0.0416667	895.48	49.3423	1.38164e-12	3
M_0.1_F_q_Set_23	1.6958	0	0.0416667	878.705	32.567	6.06886e-09	3
M_0.1_F_q_Set_24	1.71653	0	0.0416667	904.155	58.0174	1.80563e-14	3
M_0.1_F_q_Set_25	1.75326	0	0.0833333	896.805	50.667	7.12413e-13	3
M_0.1_F_q_Set_26	2.67443	0	0.0416667	924.254	78.1158	7.80407e-19	3
M_0.1_F_q_Set_27	1.83547	0	0.0416667	893.018	46.8801	4.73219e-12	3
M_0.1_F_q_Set_28	1.90406	0	0.125	897.084	50.9457	6.19767e-13	3
M_0.1_F_q_Set_29	1.74693	0	0.0416667	879.116	32.9784	4.94062e-09	3
M_0.1_F_q_Set_3	1.94527	0	0	909.101	62.9632	1.52289e-15	2
M_0.1_F_q_Set_30	1.77204	0	0.0416667	909.341	63.2032	1.35064e-15	3
M_0.1_F_q_Set_31	1.69309	0	0.0416667	903.68	57.5415	2.29062e-14	3
M_0.1_F_q_Set_32	1.86375	0	0.125	871.422	25.2838	2.31544e-07	3
M_0.1_F_q_Set_33	1.85931	0	0.0416667	890.928	44.7903	1.3454e-11	3
M_0.1_F_q_Set_34	1.77039	0	0.0416667	887.607	41.4686	7.08203e-11	3
M_0.1_F_q_Set_35	1.68403	0	0.0833333	883.472	37.3336	5.59829e-10	3
M_0.1_F_q_Set_36	2.07088	0	0	906.618	60.4799	5.27096e-15	4
M_0.1_F_q_Set_37	1.79132	0	0.0416667	879.993	33.8546	3.18792e-09	4
M_0.1_F_q_Set_38	1.90539	0	0.0416667	897.705	51.567	4.54258e-13	4
M_0.1_F_q_Set_39	1.71609	0	0.0416667	880.412	34.2735	2.58548e-09	4
M_0.1_F_q_Set_4	1.64644	0	0.0833333	900.266	54.128	1.26238e-13	2
M_0.1_F_q_Set_40	1.78074	0	0.0416667	904.651	58.5132	1.40916e-14	4
M_0.1_F_q_Set_41	1.75878	0	0.0416667	894.781	48.6434	1.95955e-12	4
M_0.1_F_q_Set_42	1.83327	0	0.0833333	866.102	19.9642	3.30964e-06	4
M_0.1_F_q_Set_43	1.91257	0	0.0416667	891.355	45.2169	1.08695e-11	4
M_0.1_F_q_Set_44	1.78333	0	0.0416667	883.838	37.7004	4.66016e-10	4
M_0.1_F_q_Set_45	1.72345	0	0.0833333	880.539	34.4014	2.42538e-09	4
M_0.1_F_q_Set_46	1.8558	0	0.0416667	865.358	19.2195	4.80258e-06	4
M_0.1_F_q_Set_47	1.84384	0	0.0416667	893.209	47.0707	4.30199e-12	4
M_0.1_F_q_Set_48	1.76998	0	0.0416667	889.935	43.7969	2.21083e-11	4
M_0.1_F_q_Set_49	1.74412	0	0.0416667	879.084	32.946	5.02125e-09	4
M_0.1_F_q_Set_5	1.70519	0	0.0416667	912.065	65.9265	3.46084e-16	2
M_0.1_F_q_Set_50	1.85474	0	0.125	872.28	26.1425	1.50723e-07	4
M_0.1_F_q_Set_51	1.81709	0	0.0416667	866.87	20.732	2.25447e-06	5
M_0.1_F_q_Set_52	2.0407	0	0.166667	891.438	45.3	1.04273e-11	5
M_0.1_F_q_Set_53	1.82087	0	0.0416667	881.558	35.4203	1.45723e-09	5
M_0.1_F_q_Set_54	1.73719	0	0.0416667	880.517	34.3788	2.45285e-09	5
M_0.1_F_q_Set_55	2.14101	0	0.125	868.533	22.3953	9.81421e-07	5
M_0.1_F_q_Set_56	1.84686	0	0.0416667	865.91	19.7722	3.64297e-06	5
M_0.1_F_q_Set_57	1.86974	0	0.0416667	867.409	21.2711	1.72183e-06	6
M_0.1_F_q_Set_6	6.92106	0	0.0416667	934.734	88.5955	4.13691e-21	2
M_0.1_F_q_Set_7	1.93346	0	0	928.597	82.4589	8.89673e-20	2
M_0.1_F_q_Set_8	1.73034	0	0.0416667	904.873	58.7348	1.26138e-14	2
M_0.1_F_q_Set_9	1.69624	0	0.0416667	913.019	66.8814	2.14703e-16	2
M_0.1_F_qp_Set_1	1.47308	0	0.0833333	936.808	90.67	1.46624e-21	3
M_0.1_F_qp_Set_10	2.40927	0	0.0833333	919.894	73.7557	6.90388e-18	3
M_0.1_F_qp_Set_11	1.84149	0	0.208333	894.335	48.197	2.44959e-12	3
M_0.1_F_qp_Set_12	1.90306	0	0.0416667	899.545	53.4071	1.81021e-13	3
M_0.1_F_qp_Set_13	1.76302	0	0.0833333	883.479	37.3409	5.57788e-10	3
M_0.1_F_qp_Set_14	1.68438	0	0.0416667	883.787	37.6494	4.78059e-10	3
M_0.1_F_qp_Set_15	1.67093	0	0.0833333	883.486	37.3476	5.55913e-10	3
M_0.1_F_qp_Set_16	4.39995	0	0.0416667	896.268	50.1302	9.31778e-13	5
M_0.1_F_qp_Set_17	1.87024	0	0	910.166	64.0282	8.94104e-16	5
M_0.1_F_qp_Set_18	1.69613	0	0.0416667	886.547	40.4087	1.20312e-10	5
M_0.1_F_qp_Set_19	1.99607	0	0.0833333	899.165	53.0269	2.1893e-13	6
M_0.1_F_qp_Set_2	2.36577	0	0.0416667	928.59	82.4522	8.92633e-20	3
M_0.1_F_qp_Set_20	2.72611	0	0.0416667	886.32	40.1816	1.34776e-10	5
M_0.1_F_qp_Set_21	1.85235	0	0.208333	892.674	46.5362	5.62005e-12	5
M_0.1_F_qp_Set_22	2.04548	0	0.125	878.789	32.6515	5.81791e-09	6
M_0.1_F_qp_Set_23	1.78526	0	0.0833333	881.989	35.8509	1.17495e-09	6
M_0.1_F_qp_Set_24	1.99067	0	0.0833333	882.3	36.1621	1.00564e-09	5
M_0.1_F_qp_Set_25	1.73391	0	0.0833333	883.045	36.9068	6.93e-10	5
M_0.1_F_qp_Set_26	2.8296	0	0	884.135	37.9973	4.0173e-10	6
M_0.1_F_qp_Set_27	1.81563	0	0.125	883.598	37.4602	5.25479e-10	5
M_0.1_F_qp_Set_28	2.00142	0	0.166667	893.956	47.8177	2.96115e-12	5
M_0.1_F_qp_Set_29	1.76604	0	0.0416667	877.344	31.2061	1.19844e-08	5
M_0.1_F_qp_Set_3	1.83786	0	0	905.71	59.5721	8.29903e-15	3
M_0.1_F_qp_Set_30	1.71882	0	0.0416667	883.007	36.8695	7.06055e-10	6
M_0.1_F_qp_Set_31	1.75048	0	0.0416667	877.785	31.6469	9.61401e-09	5
M_0.1_F_qp_Set_32	2.10284	0	0.125	865.414	19.2762	4.66845e-06	6
M_0.1_F_qp_Set_33	1.84907	0	0.125	865.719	19.581	4.00854e-06	6
M_0.1_F_qp_Set_34	1.77106	0	0.0833333	865.038	18.8997	5.63541e-06	5
M_0.1_F_qp_Set_35	1.7202	0	0.0833333	883.476	37.3377	5.5869e-10	3
M_0.1_F_qp_Set_36	2.79239	0	0	886.204	40.0662	1.42782e-10	8
M_0.1_F_qp_Set_37	1.78513	0	0.0833333	880.469	34.3313	2.51192e-09	8
M_0.1_F_qp_Set_38	2.05459	0	0.125	885.005	38.8668	2.60095e-10	9
M_0.1_F_qp_Set_39	1.80344	0	0.0416667	878.114	31.9761	8.15507e-09	8
M_0.1_F_qp_Set_4	1.58296	0	0.0833333	901.357	55.2188	7.3168e-14	3
M_0.1_F_qp_Set_40	1.99778	0	0.0416667	880.037	33.8986	3.11863e-09	8
M_0.1_F_qp_Set_41	1.79019	0	0.0416667	882.869	36.7308	7.56733e-10	9
M_0.1_F_qp_Set_42	1.83119	0	0.0833333	866.728	20.5897	2.42077e-06	8
M_0.1_F_qp_Set_43	2.04849	0	0.0833333	869.788	23.6497	5.24169e-07	9
M_0.1_F_qp_Set_44	2.08486	0	0.0833333	870.382	24.2444	3.89355e-07	9
M_0.1_F_qp_Set_45	1.72708	0	0.0833333	882.131	35.9928	1.0945e-09	6
M_0.1_F_qp_Set_46	1.86079	0	0.0416667	868.242	22.1041	1.13528e-06	8
M_0.1_F_qp_Set_47	1.85314	0	0.0416667	876.498	30.3602	1.82944e-08	10
M_0.1_F_qp_Set_48	1.83659	0	0.0416667	873.028	26.8897	1.03732e-07	9
M_0.1_F_qp_Set_49	1.76621	0	0.0416667	879.962	33.8241	3.2369e-09	6
M_0.1_F_qp_Set_5	2.02754	0	0.0833333	903.742	57.6036	2.22062e-14	3
M_0.1_F_qp_Set_50	2.12249	0	0.125	865.462	19.3244	4.55717e-06	6
M_0.1_F_qp_Set_51	1.86549	0	0.0416667	870.472	24.3337	3.72348e-07	10
M_0.1_F_qp_Set_52	2.05864	0	0.0416667	877.532	31.3935	1.09127e-08	12
M_0.1_F_qp_Set_53	1.88484	0	0.0416667	878.358	32.2205	7.21699e-09	12
M_0.1_F_qp_Set_54	1.78208	0	0.0416667	874.496	28.3581	4.97802e-08	7
M_0.1_F_qp_Set_55	2.07562	0	0.0833333	869.747	23.6085	5.35075e-07	9
M_0.1_F_qp_Set_56	1.83168	0	0.0416667	868.211	22.0727	1.15322e-06	8
M_0.1_F_qp_Set_57	1.86515	0	0.0416667	884.648	38.5098	3.10922e-10	14
M_0.1_F_qp_Set_6	2.51911	0	0.0833333	912.938	66.8003	2.23584e-16	3
M_0.1_F_qp_Set_7	1.94052	0	0	920.223	74.0851	5.85554e-18	3
M_0.1_F_qp_Set_8	1.60453	0	0.0833333	896.635	50.4968	7.75695e-13	3
M_0.1_F_qp_Set_9	1.70737	0	0.0416667	915.269	69.1313	6.97068e-17	3
M_0.1_F_lqp_Set_1	1.95925	0	0.0416667	872.294	26.156	1.49708e-07	4
M_0.1_F_lqp_Set_10	1.91302	0	0.0833333	901.295	55.1574	7.54508e-14	3
M_0.1_F_lqp_Set_11	1.84538	0	0.208333	893.742	47.6039	3.29531e-12	3
M_0.1_F_lqp_Set_12	1.87531	0	0.0416667	896.839	50.7011	7.00388e-13	3
M_0.1_F_lqp_Set_13	2.01275	0	0.0416667	856.011	9.87343	0.000513989	4
M_0.1_F_lqp_Set_14	1.98091	0	0.0416667	856.08	9.94155	0.000496776	4
M_0.1_F_lqp_Set_15	2.0581	0	0.0416667	872.556	26.4178	1.31335e-07	5
M_0.1_F_lqp_Set_16	1.98839	0	0.166667	868.799	22.6607	8.5949e-07	8
M_0.1_F_lqp_Set_17	1.99478	0	0	856.601	10.4632	0.000382722	6
M_0.1_F_lqp_Set_18	2.05635	0	0.0416667	871.417	25.2785	2.32159e-07	6
M_0.1_F_lqp_Set_19	1.96617	0	0.0416667	866.404	20.266	2.84607e-06	7
M_0.1_F_lqp_Set_2	1.99936	0	0.208333	882.729	36.5905	8.11722e-10	4
M_0.1_F_lqp_Set_20	1.94143	0	0.0833333	853.316	7.17845	0.00197771	5
M_0.1_F_lqp_Set_21	2.13301	0	0.166667	879.17	33.0315	4.81108e-09	7
M_0.1_F_lqp_Set_22	2.01402	0	0.208333	854.439	8.30049	0.00112853	6
M_0.1_F_lqp_Set_23	2.05957	0	0.0416667	853.058	6.9195	0.00225108	7
M_0.1_F_lqp_Set_24	1.99487	0	0.0416667	857.99	11.8522	0.000191102	9
M_0.1_F_lqp_Set_25	2.02944	0	0.0416667	856.304	10.1657	0.000444107	8
M_0.1_F_lqp_Set_26	2.01674	0	0	862.394	16.2558	2.11365e-05	6
M_0.1_F_lqp_Set_27	1.67383	0	0.125	879.414	33.2756	4.25826e-09	4
M_0.1_F_lqp_Set_28	2.00499	0	0.208333	896.132	49.9942	9.97314e-13	6
M_0.1_F_lqp_Set_29	2.04589	0	0.0416667	864.503	18.3645	7.36429e-06	8
M_0.1_F_lqp_Set_3	1.9966	0	0.0416667	854.747	8.60925	0.00096709	4
M_0.1_F_lqp_Set_30	2.02063	0	0.0416667	863.795	17.6568	1.04911e-05	8
M_0.1_F_lqp_Set_31	1.63947	0	0.0416667	876.815	30.6774	1.5611e-08	8
M_0.1_F_lqp_Set_32	2.10484	0	0.0416667	853.063	6.92507	0.00224483	6
M_0.1_F_lqp_Set_33	2.07027	0	0.0833333	853.117	6.97949	0.00218457	6
M_0.1_F_lqp_Set_34	2.10955	0	0.0416667	866.722	20.5835	2.42822e-06	7
M_0.1_F_lqp_Set_35	2.01232	0	0.0416667	856.039	9.90077	0.000507012	4
M_0.1_F_lqp_Set_36	1.98984	0	0.0416667	859.559	13.421	8.72181e-05	10
M_0.1_F_lqp_Set_37	2.08564	0	0.125	870.126	23.9879	4.42615e-07	10
M_0.1_F_lqp_Set_38	1.98929	0	0.208333	858.033	11.8945	0.000187101	8
M_0.1_F_lqp_Set_39	2.1087	0	0.0416667	855.573	9.43515	0.000639921	9
M_0.1_F_lqp_Set_4	2.05935	0	0.0833333	883.219	37.081	6.35189e-10	4
M_0.1_F_lqp_Set_40	1.9956	0	0.0416667	862.551	16.4126	1.95426e-05	11
M_0.1_F_lqp_Set_41	2.11468	0	0.0416667	860.395	14.2565	5.74356e-05	10
M_0.1_F_lqp_Set_42	2.11102	0	0.0416667	848.461	2.32272	0.0224166	8
M_0.1_F_lqp_Set_43	1.99442	0	0.125	853.52	7.3817	0.00178659	10
M_0.1_F_lqp_Set_44	2.12921	0	0.0833333	854.001	7.86275	0.00140465	10
M_0.1_F_lqp_Set_45	2.05489	0	0.0416667	850.3	4.16179	0.00893761	7
M_0.1_F_lqp_Set_46	2.10815	0	0.0833333	863.481	17.3434	1.22705e-05	10
M_0.1_F_lqp_Set_47	2.032	0	0.166667	862.625	16.4875	1.88251e-05	10
M_0.1_F_lqp_Set_48	1.78099	0	0.0833333	870.294	24.1557	4.07008e-07	9
M_0.1_F_lqp_Set_49	2.05659	0	0.0416667	861.88	15.7415	2.73351e-05	7
M_0.1_F_lqp_Set_5	1.96962	0	0.0416667	861.406	15.2678	3.46394e-05	5
M_0.1_F_lqp_Set_50	2.10809	0	0.0416667	858.841	12.7028	0.0001249	8
M_0.1_F_lqp_Set_51	2.12183	0	0.0833333	856.966	10.8284	0.000318845	11
M_0.1_F_lqp_Set_52	1.99116	0	0.166667	858.649	12.5109	0.00013748	12
M_0.1_F_lqp_Set_53	2.11552	0	0.0833333	863.343	17.2048	1.3151e-05	13
M_0.1_F_lqp_Set_54	2.09785	0	0.0416667	864.596	18.458	7.02815e-06	12
M_0.1_F_lqp_Set_55	2.08794	0	0.0416667	847.822	1.68391	0.0308522	8
M_0.1_F_lqp_Set_56	2.12339	0	0.0833333	870.258	24.1198	4.14378e-07	12
M_0.1_F_lqp_Set_57	2.15202	0	0.0416667	872.895	26.7566	1.10873e-07	15
M_0.1_F_lqp_Set_6	2.67956	0	0.291667	913.687	67.5486	1.53797e-16	5
M_0.1_F_lqp_Set_7	1.99948	0	0	869.493	23.3547	6.07495e-07	5
M_0.1_F_lqp_Set_8	1.70244	0	0.0833333	892.957	46.8191	4.87881e-12	4
M_0.1_F_lqp_Set_9	2.00083	0	0.0416667	910.821	64.6827	6.44579e-16	4
M_0.1_F_lqpt_Set_1	1.98949	0	0.791667	NA	NA	NA	67
M_0.1_F_lqpt_Set_10	1.99481	0	0.708333	NA	NA	NA	50
M_0.1_F_lqpt_Set_11	1.67931	0	0.541667	NA	NA	NA	58
M_0.1_F_lqpt_Set_12	1.77731	0	0.416667	NA	NA	NA	55
M_0.1_F_lqpt_Set_13	1.87693	0	0.666667	NA	NA	NA	70
M_0.1_F_lqpt_Set_14	1.96896	0	0.375	NA	NA	NA	65
M_0.1_F_lqpt_Set_15	1.83899	0	0.708333	NA	NA	NA	67
M_0.1_F_lqpt_Set_16	1.98458	0	0.708333	NA	NA	NA	86
M_0.1_F_lqpt_Set_17	1.85368	0	0.875	NA	NA	NA	93
M_0.1_F_lqpt_Set_18	1.69809	0	0.875	NA	NA	NA	87
M_0.1_F_lqpt_Set_19	1.97615	0	0.958333	NA	NA	NA	87
M_0.1_F_lqpt_Set_2	2.60635	0	0.458333	NA	NA	NA	54
M_0.1_F_lqpt_Set_20	2.52223	0	0.75	NA	NA	NA	79
M_0.1_F_lqpt_Set_21	2.0647	0	0.75	NA	NA	NA	84
M_0.1_F_lqpt_Set_22	2.51274	0	0.833333	NA	NA	NA	77
M_0.1_F_lqpt_Set_23	1.73916	0	0.875	NA	NA	NA	91
M_0.1_F_lqpt_Set_24	2.26915	0	0.958333	NA	NA	NA	87
M_0.1_F_lqpt_Set_25	1.8256	0	0.916667	NA	NA	NA	91
M_0.1_F_lqpt_Set_26	1.97058	0	0.541667	NA	NA	NA	83
M_0.1_F_lqpt_Set_27	1.69333	0	0.75	NA	NA	NA	87
M_0.1_F_lqpt_Set_28	1.99573	0	0.75	NA	NA	NA	77
M_0.1_F_lqpt_Set_29	1.84148	0	0.833333	NA	NA	NA	90
M_0.1_F_lqpt_Set_3	2.06257	0	0.75	NA	NA	NA	68
M_0.1_F_lqpt_Set_30	1.99795	0	0.458333	NA	NA	NA	85
M_0.1_F_lqpt_Set_31	1.41422	0	0.875	NA	NA	NA	88
M_0.1_F_lqpt_Set_32	1.91592	0	0.625	NA	NA	NA	79
M_0.1_F_lqpt_Set_33	1.94366	0	0.458333	NA	NA	NA	76
M_0.1_F_lqpt_Set_34	1.92967	0	0.666667	NA	NA	NA	77
M_0.1_F_lqpt_Set_35	1.83319	0	0.916667	NA	NA	NA	86
M_0.1_F_lqpt_Set_36	1.9965	0	0.916667	NA	NA	NA	104
M_0.1_F_lqpt_Set_37	1.89252	0	0.833333	NA	NA	NA	101
M_0.1_F_lqpt_Set_38	1.98772	0	0.916667	NA	NA	NA	96
M_0.1_F_lqpt_Set_39	1.80723	0	0.916667	NA	NA	NA	104
M_0.1_F_lqpt_Set_4	1.82992	0	0.75	NA	NA	NA	70
M_0.1_F_lqpt_Set_40	1.39208	0	0.958333	NA	NA	NA	106
M_0.1_F_lqpt_Set_41	1.44033	0	0.958333	NA	NA	NA	107
M_0.1_F_lqpt_Set_42	2.06431	0	0.875	NA	NA	NA	101
M_0.1_F_lqpt_Set_43	2.24767	0	0.875	NA	NA	NA	92
M_0.1_F_lqpt_Set_44	1.98767	0	0.916667	NA	NA	NA	96
M_0.1_F_lqpt_Set_45	1.77595	0	0.958333	NA	NA	NA	108
M_0.1_F_lqpt_Set_46	1.86248	0	0.875	NA	NA	NA	100
M_0.1_F_lqpt_Set_47	1.98362	0	0.583333	NA	NA	NA	97
M_0.1_F_lqpt_Set_48	1.52285	0	0.875	NA	NA	NA	105
M_0.1_F_lqpt_Set_49	1.68978	0	0.958333	NA	NA	NA	102
M_0.1_F_lqpt_Set_5	2.20629	0	0.875	NA	NA	NA	65
M_0.1_F_lqpt_Set_50	1.93795	0	0.791667	NA	NA	NA	97
M_0.1_F_lqpt_Set_51	1.99739	0	0.916667	NA	NA	NA	116
M_0.1_F_lqpt_Set_52	2.00007	0	0.958333	NA	NA	NA	113
M_0.1_F_lqpt_Set_53	1.60587	0	0.916667	NA	NA	NA	118
M_0.1_F_lqpt_Set_54	1.5612	0	0.958333	NA	NA	NA	123
M_0.1_F_lqpt_Set_55	2.01454	0	0.916667	NA	NA	NA	114
M_0.1_F_lqpt_Set_56	1.78208	0	0.916667	NA	NA	NA	117
M_0.1_F_lqpt_Set_57	1.66629	0	0.916667	NA	NA	NA	128
M_0.1_F_lqpt_Set_6	2.00005	0	0.708333	NA	NA	NA	58
M_0.1_F_lqpt_Set_7	1.98664	0	0.541667	NA	NA	NA	66
M_0.1_F_lqpt_Set_8	1.60944	0	0.666667	NA	NA	NA	70
M_0.1_F_lqpt_Set_9	1.97828	0	0.708333	NA	NA	NA	65
M_0.1_F_lqpth_Set_1	1.62168	0	0.791667	NA	NA	NA	73
M_0.1_F_lqpth_Set_10	2.68962	0	0.791667	NA	NA	NA	56
M_0.1_F_lqpth_Set_11	1.82167	0	0.583333	NA	NA	NA	65
M_0.1_F_lqpth_Set_12	2.05828	0	0.708333	NA	NA	NA	60
M_0.1_F_lqpth_Set_13	2.35433	0	0.833333	NA	NA	NA	77
M_0.1_F_lqpth_Set_14	2.22317	0	0.875	NA	NA	NA	70
M_0.1_F_lqpth_Set_15	2.58604	0	0.916667	NA	NA	NA	73
M_0.1_F_lqpth_Set_16	1.55646	0	0.875	NA	NA	NA	89
M_0.1_F_lqpth_Set_17	1.60282	0	0.916667	NA	NA	NA	97
M_0.1_F_lqpth_Set_18	1.66086	0	0.875	NA	NA	NA	96
M_0.1_F_lqpth_Set_19	1.49406	0	0.916667	NA	NA	NA	92
M_0.1_F_lqpth_Set_2	1.83506	0	0.916667	NA	NA	NA	57
M_0.1_F_lqpth_Set_20	2.05714	0	0.958333	NA	NA	NA	83
M_0.1_F_lqpth_Set_21	1.93558	0	0.916667	NA	NA	NA	89
M_0.1_F_lqpth_Set_22	1.74299	0	0.833333	NA	NA	NA	84
M_0.1_F_lqpth_Set_23	1.77525	0	0.875	NA	NA	NA	98
M_0.1_F_lqpth_Set_24	1.63703	0	1	NA	NA	NA	98
M_0.1_F_lqpth_Set_25	1.74568	0	0.958333	NA	NA	NA	98
M_0.1_F_lqpth_Set_26	2.16379	0	0.791667	NA	NA	NA	87
M_0.1_F_lqpth_Set_27	2.0473	0	0.875	NA	NA	NA	94
M_0.1_F_lqpth_Set_28	1.51019	0	0.791667	NA	NA	NA	80
M_0.1_F_lqpth_Set_29	1.89451	0	0.958333	NA	NA	NA	92
M_0.1_F_lqpth_Set_3	1.70201	0	0.708333	NA	NA	NA	73
M_0.1_F_lqpth_Set_30	1.59248	0	0.958333	NA	NA	NA	93
M_0.1_F_lqpth_Set_31	1.75335	0	0.875	NA	NA	NA	95
M_0.1_F_lqpth_Set_32	2.55702	0	0.875	NA	NA	NA	85
M_0.1_F_lqpth_Set_33	2.52957	0	0.791667	NA	NA	NA	81
M_0.1_F_lqpth_Set_34	2.3823	0	0.833333	NA	NA	NA	85
M_0.1_F_lqpth_Set_35	2.15467	0	0.958333	NA	NA	NA	89
M_0.1_F_lqpth_Set_36	1.69384	0	0.958333	NA	NA	NA	110
M_0.1_F_lqpth_Set_37	1.88572	0	0.916667	NA	NA	NA	107
M_0.1_F_lqpth_Set_38	1.56709	0	0.875	NA	NA	NA	103
M_0.1_F_lqpth_Set_39	1.73818	0	0.916667	NA	NA	NA	111
M_0.1_F_lqpth_Set_4	1.65161	0	0.791667	NA	NA	NA	75
M_0.1_F_lqpth_Set_40	1.57679	0	0.958333	NA	NA	NA	119
M_0.1_F_lqpth_Set_41	1.66478	0	0.958333	NA	NA	NA	111
M_0.1_F_lqpth_Set_42	1.70007	0	0.916667	NA	NA	NA	104
M_0.1_F_lqpth_Set_43	1.63048	0	0.958333	NA	NA	NA	103
M_0.1_F_lqpth_Set_44	1.67583	0	0.916667	NA	NA	NA	107
M_0.1_F_lqpth_Set_45	1.77415	0	1	NA	NA	NA	118
M_0.1_F_lqpth_Set_46	2.41462	0	0.916667	NA	NA	NA	109
M_0.1_F_lqpth_Set_47	2.00492	0	0.833333	NA	NA	NA	102
M_0.1_F_lqpth_Set_48	1.89435	0	0.875	NA	NA	NA	110
M_0.1_F_lqpth_Set_49	1.77581	0	0.958333	NA	NA	NA	112
M_0.1_F_lqpth_Set_5	1.77045	0	0.833333	NA	NA	NA	74
M_0.1_F_lqpth_Set_50	2.78403	0	0.916667	NA	NA	NA	106
M_0.1_F_lqpth_Set_51	1.68521	0	0.916667	NA	NA	NA	118
M_0.1_F_lqpth_Set_52	1.61226	0	0.875	NA	NA	NA	121
M_0.1_F_lqpth_Set_53	1.64025	0	0.916667	NA	NA	NA	120
M_0.1_F_lqpth_Set_54	1.71531	0	0.958333	NA	NA	NA	128
M_0.1_F_lqpth_Set_55	1.725	0	0.916667	NA	NA	NA	131
M_0.1_F_lqpth_Set_56	1.75744	0	0.958333	NA	NA	NA	132
M_0.1_F_lqpth_Set_57	1.71916	0	0.958333	NA	NA	NA	139
M_0.1_F_lqpth_Set_6	1.84576	0	0.75	NA	NA	NA	60
M_0.1_F_lqpth_Set_7	1.74556	0	0.833333	NA	NA	NA	69
M_0.1_F_lqpth_Set_8	1.55982	0	0.666667	NA	NA	NA	75
M_0.1_F_lqpth_Set_9	1.62439	0	0.875	NA	NA	NA	71
M_0.1_F_lqph_Set_1	1.73975	0	0.25	NA	NA	NA	89
M_0.1_F_lqph_Set_10	14.5609	0	0.208333	1104.68	258.547	5.1552e-58	34
M_0.1_F_lqph_Set_11	2.14967	0	0.25	NA	NA	NA	48
M_0.1_F_lqph_Set_12	1.96062	0	0.291667	1346.29	500.156	1.76753e-110	40
M_0.1_F_lqph_Set_13	1.99569	0	0.125	NA	NA	NA	50
M_0.1_F_lqph_Set_14	2.68073	0	0.125	5432.29	4586.15	0	47
M_0.1_F_lqph_Set_15	1.98789	0	0.291667	NA	NA	NA	58
M_0.1_F_lqph_Set_16	1.42627	0	0.291667	NA	NA	NA	71
M_0.1_F_lqph_Set_17	1.77979	0	0.208333	NA	NA	NA	99
M_0.1_F_lqph_Set_18	1.70782	0	0.291667	NA	NA	NA	93
M_0.1_F_lqph_Set_19	1.75901	0	0.208333	NA	NA	NA	102
M_0.1_F_lqph_Set_2	1.98781	0	0.291667	5439.49	4593.35	0	47
M_0.1_F_lqph_Set_20	1.81374	0	0.125	NA	NA	NA	58
M_0.1_F_lqph_Set_21	1.89739	0	0.375	NA	NA	NA	74
M_0.1_F_lqph_Set_22	1.90859	0	0.208333	NA	NA	NA	62
M_0.1_F_lqph_Set_23	2.10837	0	0.125	NA	NA	NA	83
M_0.1_F_lqph_Set_24	1.99544	0	0.125	NA	NA	NA	71
M_0.1_F_lqph_Set_25	2.07482	0	0.166667	NA	NA	NA	85
M_0.1_F_lqph_Set_26	1.7519	0	0.166667	NA	NA	NA	65
M_0.1_F_lqph_Set_27	2.2523	0	0.458333	NA	NA	NA	87
M_0.1_F_lqph_Set_28	1.45851	0	0.458333	NA	NA	NA	87
M_0.1_F_lqph_Set_29	1.99531	0	0.25	NA	NA	NA	82
M_0.1_F_lqph_Set_3	1.72325	0	0.0416667	NA	NA	NA	51
M_0.1_F_lqph_Set_30	1.773	0	0.291667	NA	NA	NA	78
M_0.1_F_lqph_Set_31	1.72835	0	0.416667	NA	NA	NA	89
M_0.1_F_lqph_Set_32	2.55854	0	0.208333	NA	NA	NA	54
M_0.1_F_lqph_Set_33	2.36518	0	0.166667	NA	NA	NA	51
M_0.1_F_lqph_Set_34	2.00482	0	0.291667	NA	NA	NA	68
M_0.1_F_lqph_Set_35	2.35565	0	0.125	NA	NA	NA	70
M_0.1_F_lqph_Set_36	1.55869	0	0.25	NA	NA	NA	98
M_0.1_F_lqph_Set_37	1.77234	0	0.458333	NA	NA	NA	98
M_0.1_F_lqph_Set_38	1.60969	0	0.416667	NA	NA	NA	94
M_0.1_F_lqph_Set_39	2.01742	0	0.208333	NA	NA	NA	112
M_0.1_F_lqph_Set_4	1.96661	0	0.208333	NA	NA	NA	61
M_0.1_F_lqph_Set_40	1.86837	0	0.333333	NA	NA	NA	102
M_0.1_F_lqph_Set_41	1.71062	0	0.291667	NA	NA	NA	97
M_0.1_F_lqph_Set_42	2.12404	0	0.25	NA	NA	NA	85
M_0.1_F_lqph_Set_43	2.07468	0	0.208333	NA	NA	NA	84
M_0.1_F_lqph_Set_44	2.1115	0	0.25	NA	NA	NA	85
M_0.1_F_lqph_Set_45	2.10207	0	0.166667	NA	NA	NA	99
M_0.1_F_lqph_Set_46	2.44693	0	0.375	NA	NA	NA	92
M_0.1_F_lqph_Set_47	1.77044	0	0.416667	NA	NA	NA	81
M_0.1_F_lqph_Set_48	1.76031	0	0.541667	NA	NA	NA	90
M_0.1_F_lqph_Set_49	1.84917	0	0.291667	NA	NA	NA	94
M_0.1_F_lqph_Set_5	1.90333	0	0.166667	NA	NA	NA	56
M_0.1_F_lqph_Set_50	2.35183	0	0.25	NA	NA	NA	73
M_0.1_F_lqph_Set_51	1.90611	0	0.416667	NA	NA	NA	117
M_0.1_F_lqph_Set_52	1.66323	0	0.416667	NA	NA	NA	101
M_0.1_F_lqph_Set_53	1.59641	0	0.625	NA	NA	NA	108
M_0.1_F_lqph_Set_54	2.11442	0	0.25	NA	NA	NA	120
M_0.1_F_lqph_Set_55	2.40226	0	0.25	NA	NA	NA	108
M_0.1_F_lqph_Set_56	2.24393	0	0.416667	NA	NA	NA	93
M_0.1_F_lqph_Set_57	1.86567	0	0.458333	NA	NA	NA	114
M_0.1_F_lqph_Set_6	2.22299	0	0.166667	NA	NA	NA	55
M_0.1_F_lqph_Set_7	1.71558	0	0.208333	NA	NA	NA	54
M_0.1_F_lqph_Set_8	2.00151	0	0.208333	NA	NA	NA	69
M_0.1_F_lqph_Set_9	1.46641	0	0.25	NA	NA	NA	64
M_0.25_F_lq_Set_1	1.95844	0	0.0416667	872.594	26.456	1.28854e-07	4
M_0.25_F_lq_Set_10	1.95581	0	0.0833333	901.61	55.4719	6.44729e-14	3
M_0.25_F_lq_Set_11	1.88691	0	0.166667	893.799	47.6608	3.20277e-12	3
M_0.25_F_lq_Set_12	1.90439	0	0.0416667	899.351	53.2135	1.99425e-13	3
M_0.25_F_lq_Set_13	2.01207	0	0.0416667	856.364	10.2261	0.000430886	4
M_0.25_F_lq_Set_14	2.00855	0	0.0416667	857.732	11.5939	0.000217451	4
M_0.25_F_lq_Set_15	1.68148	0	0.0833333	886.794	40.6557	1.06335e-10	4
M_0.25_F_lq_Set_16	1.99663	0	0.0416667	864.518	18.3801	7.30725e-06	6
M_0.25_F_lq_Set_17	1.98885	0	0	854.337	8.19916	0.00118718	5
M_0.25_F_lq_Set_18	2.03111	0	0.0833333	872.625	26.4871	1.26863e-07	6
M_0.25_F_lq_Set_19	1.96728	0	0.0416667	863.626	17.4877	1.14166e-05	4
M_0.25_F_lq_Set_2	1.99956	0	0.166667	889.41	43.2719	2.87451e-11	3
M_0.25_F_lq_Set_20	1.9979	0	0.0416667	854.743	8.60533	0.000968989	5
M_0.25_F_lq_Set_21	2.16585	0	0.208333	876.908	30.7698	1.49058e-08	5
M_0.25_F_lq_Set_22	2.0274	0	0.125	854.2	8.06211	0.00127139	5
M_0.25_F_lq_Set_23	2.04183	0	0.0416667	851.403	5.26495	0.00514841	6
M_0.25_F_lq_Set_24	1.99033	0	0.0416667	851.198	5.06026	0.00570323	6
M_0.25_F_lq_Set_25	2.08196	0	0.0833333	853.249	7.11091	0.00204563	5
M_0.25_F_lq_Set_26	2.04076	0	0	862.995	16.8574	1.56459e-05	5
M_0.25_F_lq_Set_27	1.76623	0	0.125	879.43	33.2924	4.22268e-09	4
M_0.25_F_lq_Set_28	2.00294	0	0.208333	899.558	53.4196	1.79893e-13	5
M_0.25_F_lq_Set_29	2.0063	0	0.0416667	860.948	14.8101	4.3549e-05	6
M_0.25_F_lq_Set_3	1.99771	0	0.0416667	855.105	8.96746	0.000808507	4
M_0.25_F_lq_Set_30	2.02814	0	0.0416667	863.107	16.9689	1.47976e-05	6
M_0.25_F_lq_Set_31	1.70918	0	0.0833333	888.425	42.2872	4.70328e-11	6
M_0.25_F_lq_Set_32	2.10269	0	0.0416667	850.911	4.77327	0.00658323	5
M_0.25_F_lq_Set_33	2.04798	0	0.0833333	852.201	6.06322	0.00345407	5
M_0.25_F_lq_Set_34	1.76283	0	0.0833333	875.796	29.6576	2.59941e-08	5
M_0.25_F_lq_Set_35	2.01083	0	0.0416667	856.361	10.2232	0.000431519	4
M_0.25_F_lq_Set_36	1.9941	0	0	851.864	5.72572	0.004089	7
M_0.25_F_lq_Set_37	2.12704	0	0.0416667	861.824	15.686	2.81048e-05	7
M_0.25_F_lq_Set_38	2.02189	0	0.125	853.734	7.59607	0.001605	6
M_0.25_F_lq_Set_39	2.04506	0	0.0416667	853.477	7.33857	0.00182554	8
M_0.25_F_lq_Set_4	2.06121	0	0.0833333	883.808	37.6696	4.7324e-10	4
M_0.25_F_lq_Set_40	1.99596	0	0.0416667	854.161	8.02279	0.00129663	8
M_0.25_F_lq_Set_41	2.07616	0	0.0416667	857.849	11.7112	0.000205062	8
M_0.25_F_lq_Set_42	2.10052	0	0.0416667	846.471	0.333213	0.0606158	7
M_0.25_F_lq_Set_43	2.00414	0	0.0833333	846.138	0	0.0716048	7
M_0.25_F_lq_Set_44	2.1467	0	0.125	849.027	2.88864	0.016892	7
M_0.25_F_lq_Set_45	2.04953	0	0.0416667	854.366	8.22819	0.00117007	7
M_0.25_F_lq_Set_46	2.08543	0	0.0416667	855.566	9.42756	0.000642353	7
M_0.25_F_lq_Set_47	2.05624	0	0.0833333	857.754	11.6158	0.000215087	7
M_0.25_F_lq_Set_48	1.82903	0	0.0416667	871.869	25.7313	1.85125e-07	6
M_0.25_F_lq_Set_49	2.01874	0	0.0416667	860.96	14.8222	4.3286e-05	6
M_0.25_F_lq_Set_5	1.97182	0	0.0416667	865.266	19.1275	5.02861e-06	4
M_0.25_F_lq_Set_50	2.09588	0	0.0416667	850.912	4.77366	0.00658197	5
M_0.25_F_lq_Set_51	2.10644	0	0.0416667	847.196	1.05803	0.0421885	8
M_0.25_F_lq_Set_52	2.01385	0	0.0833333	847.436	1.29807	0.0374172	8
M_0.25_F_lq_Set_53	2.14326	0	0.0416667	848.535	2.39694	0.0216	8
M_0.25_F_lq_Set_54	2.04582	0	0.0416667	853.917	7.77882	0.00146485	8
M_0.25_F_lq_Set_55	2.11058	0	0.0416667	849.426	3.28846	0.0138313	8
M_0.25_F_lq_Set_56	2.09242	0	0.0416667	855.51	9.372	0.000660447	7
M_0.25_F_lq_Set_57	2.1022	0	0.0416667	847.363	1.22488	0.0388116	8
M_0.25_F_lq_Set_6	2.47919	0	0.291667	911.975	65.8375	3.61841e-16	4
M_0.25_F_lq_Set_7	1.99675	0	0	869.919	23.7812	4.90824e-07	4
M_0.25_F_lq_Set_8	1.72185	0	0.0833333	894.759	48.6211	1.98155e-12	4
M_0.25_F_lq_Set_9	2.00078	0	0.0416667	912.632	66.4941	2.6057e-16	3
M_0.25_F_lp_Set_1	1.93645	0	0.0416667	892.494	46.3558	6.15044e-12	3
M_0.25_F_lp_Set_10	45.9678	0	0.208333	944.292	98.1537	3.47646e-23	2
M_0.25_F_lp_Set_11	8.26755	0	0.0416667	928.169	82.0308	1.10199e-19	2
M_0.25_F_lp_Set_12	1.88227	0	0.0416667	898.188	52.0497	3.56854e-13	2
M_0.25_F_lp_Set_13	1.96729	0	0.0416667	876.319	30.181	2.00091e-08	3
M_0.25_F_lp_Set_14	1.7025	0	0.0416667	910.939	64.8005	6.07696e-16	2
M_0.25_F_lp_Set_15	1.70775	0	0.0416667	912.314	66.1758	3.05528e-16	3
M_0.25_F_lp_Set_16	2.00558	0	0.0416667	872.024	25.8858	1.71364e-07	4
M_0.25_F_lp_Set_17	1.98098	0	0	865.111	18.9727	5.43328e-06	5
M_0.25_F_lp_Set_18	1.92639	0	0.0416667	881.086	34.9476	1.84568e-09	4
M_0.25_F_lp_Set_19	1.97386	0	0.0416667	897.384	51.2459	5.33379e-13	6
M_0.25_F_lp_Set_2	3.54539	0	0.0833333	940.317	94.1786	2.53695e-22	3
M_0.25_F_lp_Set_20	1.98634	0	0	874.822	28.6841	4.22931e-08	5
M_0.25_F_lp_Set_21	2.02889	0	0.208333	883.261	37.1229	6.22024e-10	4
M_0.25_F_lp_Set_22	1.89941	0	0.0416667	898.912	52.7739	2.4845e-13	5
M_0.25_F_lp_Set_23	1.99716	0	0.0416667	860.106	13.9677	6.63576e-05	5
M_0.25_F_lp_Set_24	1.99475	0	0.0416667	861.922	15.7842	2.6757e-05	6
M_0.25_F_lp_Set_25	2.00046	0	0.0416667	864.247	18.1089	8.36832e-06	4
M_0.25_F_lp_Set_26	1.98948	0	0	891.818	45.6803	8.62184e-12	5
M_0.25_F_lp_Set_27	2.01167	0	0.208333	891.63	45.4922	9.47193e-12	4
M_0.25_F_lp_Set_28	1.84383	0	0.0416667	899.307	53.1689	2.03925e-13	4
M_0.25_F_lp_Set_29	1.96405	0	0.0416667	877.453	31.3148	1.13506e-08	5
M_0.25_F_lp_Set_3	1.96644	0	0	871.664	25.5263	2.05101e-07	3
M_0.25_F_lp_Set_30	1.77163	0	0.0416667	883.854	37.7164	4.62315e-10	5
M_0.25_F_lp_Set_31	2.00142	0	0.0833333	884.91	38.7716	2.72771e-10	4
M_0.25_F_lp_Set_32	1.99762	0	0.0416667	873.371	27.2334	8.7354e-08	5
M_0.25_F_lp_Set_33	1.94296	0	0.0416667	894.453	48.3148	2.30944e-12	3
M_0.25_F_lp_Set_34	1.86501	0	0.0416667	893.321	47.1834	4.06623e-12	4
M_0.25_F_lp_Set_35	1.99533	0	0.0416667	865.845	19.7069	3.76399e-06	5
M_0.25_F_lp_Set_36	1.99735	0	0	857.025	10.8869	0.000309663	6
M_0.25_F_lp_Set_37	2.00431	0	0.0416667	869.079	22.9412	7.47011e-07	6
M_0.25_F_lp_Set_38	2.01223	0	0.0416667	873.63	27.4922	7.67528e-08	5
M_0.25_F_lp_Set_39	1.99927	0	0.0416667	862.092	15.9542	2.45774e-05	6
M_0.25_F_lp_Set_4	1.99817	0	0.0833333	892.716	46.5783	5.50286e-12	3
M_0.25_F_lp_Set_40	1.99561	0	0.0416667	867.107	20.9686	2.00291e-06	8
M_0.25_F_lp_Set_41	1.99632	0	0.0416667	873.289	27.1506	9.10451e-08	8
M_0.25_F_lp_Set_42	2.02435	0	0.0416667	854.711	8.57343	0.000984567	6
M_0.25_F_lp_Set_43	2.00791	0	0.0416667	860.376	14.238	5.79686e-05	8
M_0.25_F_lp_Set_44	2.01729	0	0.0833333	861.579	15.4407	3.17714e-05	7
M_0.25_F_lp_Set_45	2.00376	0	0.0416667	862.183	16.0447	2.34896e-05	7
M_0.25_F_lp_Set_46	2.00201	0	0.0416667	871.893	25.7548	1.82962e-07	8
M_0.25_F_lp_Set_47	2.00142	0	0.0416667	869.789	23.6507	5.23905e-07	6
M_0.25_F_lp_Set_48	2.00341	0	0.0833333	873.734	27.5957	7.28802e-08	7
M_0.25_F_lp_Set_49	1.97906	0	0.0416667	872.137	25.9986	1.61962e-07	7
M_0.25_F_lp_Set_5	1.5996	0	0.0416667	914.255	68.1167	1.15766e-16	3
M_0.25_F_lp_Set_50	2.01879	0	0.0416667	860.7	14.5623	4.92915e-05	6
M_0.25_F_lp_Set_51	2.00746	0	0.0416667	860.19	14.0523	6.36098e-05	8
M_0.25_F_lp_Set_52	2.00527	0	0.0416667	860.531	14.3931	5.36452e-05	8
M_0.25_F_lp_Set_53	2.01844	0	0.0416667	866.732	20.5938	2.41583e-06	9
M_0.25_F_lp_Set_54	2.00392	0	0.0416667	868.224	22.0862	1.14546e-06	9
M_0.25_F_lp_Set_55	2.01446	0	0.0416667	855.295	9.15705	0.000735384	7
M_0.25_F_lp_Set_56	2.00553	0	0.0416667	869.167	23.0292	7.14859e-07	9
M_0.25_F_lp_Set_57	2.01421	0	0.0416667	857.389	11.2509	0.000258134	8
M_0.25_F_lp_Set_6	5.39841	0	0.0416667	924.65	78.5124	6.40026e-19	2
M_0.25_F_lp_Set_7	1.97479	0	0	894.119	47.9814	2.72844e-12	3
M_0.25_F_lp_Set_8	2.00112	0	0.0833333	908.773	62.6346	1.79481e-15	3
M_0.25_F_lp_Set_9	1.71768	0	0.0416667	913.72	67.5818	1.51268e-16	2
M_0.25_F_q_Set_1	1.69064	0	0.166667	939.27	93.1316	4.28235e-22	2
M_0.25_F_q_Set_10	8.38393	0	0.166667	942.146	96.0077	1.01656e-22	2
M_0.25_F_q_Set_11	1.78261	0	0.125	894.047	47.9087	2.82944e-12	2
M_0.25_F_q_Set_12	1.92382	0	0.0416667	897.42	51.2818	5.23902e-13	2
M_0.25_F_q_Set_13	1.73143	0	0.0416667	881.29	35.1525	1.66602e-09	2
M_0.25_F_q_Set_14	1.74609	0	0.0416667	907.08	60.9417	4.18423e-15	2
M_0.25_F_q_Set_15	1.6762	0	0.0416667	901.444	55.3057	7.00574e-14	2
M_0.25_F_q_Set_16	6.50017	0	0.0416667	936.981	90.8425	1.34507e-21	3
M_0.25_F_q_Set_17	1.81909	0	0	911.272	65.1338	5.14417e-16	3
M_0.25_F_q_Set_18	1.80446	0	0.0416667	892.64	46.5021	5.71668e-12	3
M_0.25_F_q_Set_19	1.70793	0	0.0416667	914.281	68.1431	1.14249e-16	3
M_0.25_F_q_Set_2	7.15929	0	0.125	942.479	96.3413	8.60378e-23	2
M_0.25_F_q_Set_20	2.04828	0	0	904.364	58.2257	1.62699e-14	3
M_0.25_F_q_Set_21	1.73607	0	0.208333	891.983	45.8453	7.93906e-12	3
M_0.25_F_q_Set_22	1.91244	0	0.0416667	895.486	49.3485	1.3774e-12	3
M_0.25_F_q_Set_23	1.71089	0	0.0416667	878.712	32.5736	6.04882e-09	3
M_0.25_F_q_Set_24	1.71523	0	0.0416667	904.161	58.0228	1.80078e-14	3
M_0.25_F_q_Set_25	1.75177	0	0.0833333	896.811	50.6729	7.1032e-13	3
M_0.25_F_q_Set_26	2.61724	0	0.0416667	924.259	78.1214	7.7819e-19	3
M_0.25_F_q_Set_27	1.80533	0	0.0416667	893.028	46.8897	4.70946e-12	3
M_0.25_F_q_Set_28	1.90723	0	0.125	897.096	50.958	6.1596e-13	3
M_0.25_F_q_Set_29	1.70521	0	0.0416667	879.123	32.9853	4.92353e-09	3
M_0.25_F_q_Set_3	1.94421	0	0	909.106	62.968	1.51917e-15	2
M_0.25_F_q_Set_30	1.73982	0	0.0416667	909.345	63.2067	1.34828e-15	3
M_0.25_F_q_Set_31	1.69753	0	0.0416667	903.693	57.5551	2.27511e-14	3
M_0.25_F_q_Set_32	1.84149	0	0.125	871.427	25.2885	2.30998e-07	3
M_0.25_F_q_Set_33	1.87753	0	0.0416667	890.933	44.7947	1.34247e-11	3
M_0.25_F_q_Set_34	1.75313	0	0.0416667	887.613	41.475	7.05938e-11	3
M_0.25_F_q_Set_35	1.68763	0	0.0833333	883.475	37.3374	5.58774e-10	3
M_0.25_F_q_Set_36	2.07525	0	0	906.642	60.5045	5.20667e-15	4
M_0.25_F_q_Set_37	1.772	0	0.0416667	880.011	33.8727	3.15926e-09	4
M_0.25_F_q_Set_38	1.8947	0	0.0416667	897.716	51.5784	4.51683e-13	4
M_0.25_F_q_Set_39	1.73209	0	0.0416667	880.419	34.2812	2.57552e-09	4
M_0.25_F_q_Set_4	1.71924	0	0.0833333	900.271	54.1334	1.25898e-13	2
M_0.25_F_q_Set_40	1.75632	0	0.0416667	904.678	58.5395	1.39073e-14	4
M_0.25_F_q_Set_41	1.74609	0	0.0416667	894.797	48.6593	1.94408e-12	4
M_0.25_F_q_Set_42	1.84566	0	0.0833333	866.112	19.974	3.29333e-06	4
M_0.25_F_q_Set_43	1.95511	0	0.0416667	891.361	45.2235	1.0834e-11	4
M_0.25_F_q_Set_44	1.7439	0	0.0416667	883.845	37.7071	4.6447e-10	4
M_0.25_F_q_Set_45	1.72115	0	0.0833333	880.566	34.4281	2.39315e-09	4
M_0.25_F_q_Set_46	1.85935	0	0.0416667	865.367	19.2294	4.77887e-06	4
M_0.25_F_q_Set_47	1.8721	0	0.0416667	893.22	47.082	4.27786e-12	4
M_0.25_F_q_Set_48	1.7588	0	0.0416667	889.949	43.8106	2.19583e-11	4
M_0.25_F_q_Set_49	1.74619	0	0.0416667	879.143	33.0047	4.87589e-09	4
M_0.25_F_q_Set_5	1.69792	0	0.0416667	912.069	65.9307	3.45364e-16	2
M_0.25_F_q_Set_50	1.82977	0	0.125	872.286	26.1478	1.50321e-07	4
M_0.25_F_q_Set_51	1.82589	0	0.0416667	866.881	20.7428	2.24228e-06	5
M_0.25_F_q_Set_52	1.96244	0	0.125	891.469	45.3312	1.0266e-11	5
M_0.25_F_q_Set_53	1.77308	0	0.0416667	881.578	35.4401	1.44287e-09	5
M_0.25_F_q_Set_54	1.71706	0	0.0416667	880.574	34.4363	2.3834e-09	5
M_0.25_F_q_Set_55	2.12903	0	0.125	868.567	22.4292	9.6497e-07	5
M_0.25_F_q_Set_56	1.81143	0	0.0416667	865.993	19.8546	3.49607e-06	5
M_0.25_F_q_Set_57	1.83692	0	0.0416667	867.491	21.3528	1.6529e-06	6
M_0.25_F_q_Set_6	6.44521	0	0.0416667	934.739	88.6005	4.12651e-21	2
M_0.25_F_q_Set_7	1.93447	0	0	928.599	82.4609	8.88775e-20	2
M_0.25_F_q_Set_8	1.7442	0	0.0416667	904.878	58.7398	1.25819e-14	2
M_0.25_F_q_Set_9	1.69587	0	0.0416667	913.03	66.8922	2.13548e-16	2
M_0.25_F_qp_Set_1	1.68414	0	0.125	938.375	92.2373	6.69695e-22	3
M_0.25_F_qp_Set_10	2.46747	0	0.208333	922.193	76.0545	2.18736e-18	3
M_0.25_F_qp_Set_11	1.80821	0	0.166667	894.383	48.2453	2.39114e-12	3
M_0.25_F_qp_Set_12	1.9953	0	0.0416667	899.603	53.4653	1.7583e-13	3
M_0.25_F_qp_Set_13	1.66889	0	0.0833333	883.507	37.3687	5.5009e-10	3
M_0.25_F_qp_Set_14	1.69153	0	0.0416667	885.754	39.6156	1.78865e-10	3
M_0.25_F_qp_Set_15	1.66041	0	0.0833333	883.609	37.4707	5.2274e-10	3
M_0.25_F_qp_Set_16	2.32061	0	0.0416667	898.841	52.7026	2.57461e-13	5
M_0.25_F_qp_Set_17	1.88196	0	0	908.713	62.5752	1.84888e-15	3
M_0.25_F_qp_Set_18	1.68368	0	0.0833333	890.609	44.4705	1.57866e-11	6
M_0.25_F_qp_Set_19	1.97571	0	0.0833333	903.136	56.9981	3.00579e-14	5
M_0.25_F_qp_Set_2	2.23376	0	0.0833333	930.804	84.6665	2.95019e-20	3
M_0.25_F_qp_Set_20	2.15185	0	0	887.181	41.0426	8.76289e-11	4
M_0.25_F_qp_Set_21	1.84718	0	0.166667	893.845	47.707	3.12967e-12	5
M_0.25_F_qp_Set_22	2.04022	0	0.0833333	881.081	34.9426	1.85035e-09	6
M_0.25_F_qp_Set_23	1.75788	0	0.0833333	879.826	33.6876	3.46556e-09	4
M_0.25_F_qp_Set_24	1.81416	0	0.0416667	883.749	37.6112	4.87266e-10	4
M_0.25_F_qp_Set_25	1.65756	0	0.0833333	880.975	34.8374	1.9503e-09	4
M_0.25_F_qp_Set_26	2.05674	0	0	886.7	40.5617	1.11451e-10	6
M_0.25_F_qp_Set_27	1.78795	0	0.125	883.854	37.7156	4.62497e-10	5
M_0.25_F_qp_Set_28	2.00708	0	0.125	895.218	49.0802	1.57513e-12	4
M_0.25_F_qp_Set_29	1.71027	0	0.0416667	878.254	32.1157	7.60504e-09	5
M_0.25_F_qp_Set_3	1.94306	0	0	906.501	60.3631	5.58818e-15	2
M_0.25_F_qp_Set_30	1.75598	0	0.0416667	881.937	35.7989	1.20591e-09	4
M_0.25_F_qp_Set_31	1.73019	0	0.0416667	881.981	35.843	1.17961e-09	6
M_0.25_F_qp_Set_32	1.86495	0	0.125	867.504	21.3663	1.64173e-06	6
M_0.25_F_qp_Set_33	1.88727	0	0.0416667	868.995	22.857	7.79114e-07	6
M_0.25_F_qp_Set_34	2.10681	0	0.0416667	868.818	22.6803	8.51101e-07	5
M_0.25_F_qp_Set_35	1.68287	0	0.0833333	883.491	37.3527	5.54495e-10	3
M_0.25_F_qp_Set_36	2.22981	0	0	883.189	37.0508	6.44864e-10	6
M_0.25_F_qp_Set_37	1.81145	0	0.0416667	879.008	32.8697	5.21656e-09	7
M_0.25_F_qp_Set_38	2.03822	0	0.0833333	882.021	35.8834	1.15598e-09	7
M_0.25_F_qp_Set_39	1.76734	0	0.0416667	877.279	31.1412	1.23798e-08	7
M_0.25_F_qp_Set_4	1.57912	0	0.0833333	901.393	55.2555	7.18405e-14	3
M_0.25_F_qp_Set_40	1.82469	0	0.0416667	883.622	37.4843	5.19194e-10	7
M_0.25_F_qp_Set_41	1.72541	0	0.0416667	878.447	32.3086	6.90598e-09	7
M_0.25_F_qp_Set_42	1.8463	0	0.0833333	865.502	19.3644	4.4671e-06	7
M_0.25_F_qp_Set_43	1.91936	0	0.0416667	873.266	27.1278	9.20887e-08	9
M_0.25_F_qp_Set_44	2.07527	0	0.125	867.794	21.6564	1.42005e-06	7
M_0.25_F_qp_Set_45	2.06477	0	0.0833333	885.718	39.58	1.8208e-10	6
M_0.25_F_qp_Set_46	1.80024	0	0.0416667	867.539	21.4009	1.61358e-06	7
M_0.25_F_qp_Set_47	1.89289	0	0.0416667	873.221	27.0831	9.41707e-08	8
M_0.25_F_qp_Set_48	2.10359	0	0.0416667	866.978	20.8396	2.13643e-06	6
M_0.25_F_qp_Set_49	1.71548	0	0.0416667	878.254	32.1158	7.60468e-09	5
M_0.25_F_qp_Set_5	1.99333	0	0.0416667	904.294	58.1564	1.68442e-14	3
M_0.25_F_qp_Set_50	1.82814	0	0.125	867.567	21.4292	1.59097e-06	6
M_0.25_F_qp_Set_51	2.09491	0	0.0416667	869.345	23.2069	6.5408e-07	9
M_0.25_F_qp_Set_52	1.88841	0	0.0416667	875.533	29.3952	2.96392e-08	10
M_0.25_F_qp_Set_53	2.09385	0	0.0416667	871.077	24.9386	2.75164e-07	9
M_0.25_F_qp_Set_54	1.73663	0	0.0416667	876.077	29.9394	2.25785e-08	7
M_0.25_F_qp_Set_55	1.83063	0	0.125	865.549	19.4111	4.36385e-06	7
M_0.25_F_qp_Set_56	1.83839	0	0.0416667	867.57	21.4324	1.58837e-06	7
M_0.25_F_qp_Set_57	2.0956	0	0.0416667	869.419	23.2812	6.30226e-07	9
M_0.25_F_qp_Set_6	2.89854	0	0.0416667	914.048	67.91	1.28375e-16	3
M_0.25_F_qp_Set_7	1.8702	0	0	920.886	74.7478	4.204e-18	3
M_0.25_F_qp_Set_8	1.57295	0	0.0833333	896.748	50.6095	7.33204e-13	3
M_0.25_F_qp_Set_9	1.70229	0	0.0416667	913.074	66.9362	2.08892e-16	2
M_0.25_F_lqp_Set_1	1.96827	0	0.0416667	875.462	29.3239	3.07148e-08	4
M_0.25_F_lqp_Set_10	2.00086	0	0.0833333	907.031	60.8933	4.28674e-15	4
M_0.25_F_lqp_Set_11	1.85774	0	0.166667	893.789	47.6509	3.21862e-12	3
M_0.25_F_lqp_Set_12	1.99499	0	0.0416667	899.503	53.3648	1.84895e-13	3
M_0.25_F_lqp_Set_13	1.75949	0	0.0416667	859.026	12.8875	0.000113882	4
M_0.25_F_lqp_Set_14	1.99954	0	0.0416667	859.558	13.4197	8.72754e-05	4
M_0.25_F_lqp_Set_15	1.69567	0	0.0833333	876.192	30.0535	2.13257e-08	5
M_0.25_F_lqp_Set_16	1.99741	0	0	866.9	20.7621	2.22082e-06	6
M_0.25_F_lqp_Set_17	1.99276	0	0	858.037	11.8994	0.000186646	5
M_0.25_F_lqp_Set_18	1.99301	0	0.0833333	875.635	29.4965	2.81746e-08	6
M_0.25_F_lqp_Set_19	1.96848	0	0.0416667	868.62	22.4822	9.39696e-07	5
M_0.25_F_lqp_Set_2	1.99947	0	0.208333	893.642	47.504	3.46407e-12	4
M_0.25_F_lqp_Set_20	1.99729	0	0	857.219	11.0815	0.00028095	5
M_0.25_F_lqp_Set_21	2.13548	0	0.208333	882.357	36.2194	9.7722e-10	6
M_0.25_F_lqp_Set_22	2.02722	0	0.125	856.085	9.94703	0.000495418	5
M_0.25_F_lqp_Set_23	2.02484	0	0.0416667	854.638	8.50011	0.00102133	6
M_0.25_F_lqp_Set_24	1.99441	0	0.0416667	854.746	8.60792	0.000967734	6
M_0.25_F_lqp_Set_25	2.0297	0	0.0416667	855.768	9.62986	0.000580557	6
M_0.25_F_lqp_Set_26	2.0069	0	0	866.552	20.4136	2.64351e-06	6
M_0.25_F_lqp_Set_27	1.70164	0	0.125	879.629	33.4909	3.82369e-09	4
M_0.25_F_lqp_Set_28	2.00337	0	0.166667	895.216	49.0781	1.57674e-12	4
M_0.25_F_lqp_Set_29	1.77017	0	0.0416667	863.365	17.2268	1.30074e-05	6
M_0.25_F_lqp_Set_3	1.99715	0	0	858.45	12.3115	0.000151892	4
M_0.25_F_lqp_Set_30	2.00077	0	0.0416667	867.193	21.0551	1.91816e-06	7
M_0.25_F_lqp_Set_31	2.04005	0	0.0416667	875.716	29.5775	2.70565e-08	5
M_0.25_F_lqp_Set_32	2.0791	0	0.0833333	856.21	10.0724	0.00046531	6
M_0.25_F_lqp_Set_33	2.00626	0	0.0416667	854.081	7.94263	0.00134965	5
M_0.25_F_lqp_Set_34	2.109	0	0.0416667	875.967	29.8286	2.38645e-08	8
M_0.25_F_lqp_Set_35	1.74968	0	0.0416667	859.155	13.0171	0.000106737	4
M_0.25_F_lqp_Set_36	1.99702	0	0	856.389	10.2513	0.000425503	7
M_0.25_F_lqp_Set_37	2.08948	0	0.0416667	862.832	16.6937	1.69807e-05	6
M_0.25_F_lqp_Set_38	2.02168	0	0.0833333	857.201	11.0628	0.000283585	6
M_0.25_F_lqp_Set_39	2.02494	0	0.0416667	857.896	11.7583	0.000200289	8
M_0.25_F_lqp_Set_4	2.04555	0	0.0833333	886.733	40.5949	1.09616e-10	4
M_0.25_F_lqp_Set_40	1.99773	0	0.0416667	856.839	10.7015	0.000339741	7
M_0.25_F_lqp_Set_41	2.0327	0	0.0416667	860.151	14.0126	6.48851e-05	8
M_0.25_F_lqp_Set_42	2.05326	0	0.0416667	849.529	3.39054	0.013143	7
M_0.25_F_lqp_Set_43	2.03041	0	0.0416667	849.858	3.71949	0.0111498	7
M_0.25_F_lqp_Set_44	2.05942	0	0.0833333	847.966	1.82836	0.0287024	6
M_0.25_F_lqp_Set_45	2.02122	0	0.0416667	854.51	8.37193	0.00108893	6
M_0.25_F_lqp_Set_46	2.07744	0	0.0416667	858.301	12.1633	0.000163573	7
M_0.25_F_lqp_Set_47	2.00925	0	0.0416667	858.753	12.6154	0.00013048	7
M_0.25_F_lqp_Set_48	2.08881	0	0.0416667	865.127	18.9894	5.38813e-06	6
M_0.25_F_lqp_Set_49	1.71771	0	0.0416667	862.258	16.1197	2.26249e-05	6
M_0.25_F_lqp_Set_5	1.97379	0	0.0416667	866.389	20.2509	2.86763e-06	4
M_0.25_F_lqp_Set_50	2.07878	0	0.0833333	853.329	7.19058	0.00196575	5
M_0.25_F_lqp_Set_51	2.04798	0	0.0416667	850.529	4.39136	0.00796837	8
M_0.25_F_lqp_Set_52	2.0315	0	0.0416667	855.439	9.30126	0.000684226	9
M_0.25_F_lqp_Set_53	2.06273	0	0.0416667	857.233	11.0951	0.000279042	10
M_0.25_F_lqp_Set_54	2.02854	0	0.0416667	861.11	14.9724	4.01531e-05	9
M_0.25_F_lqp_Set_55	2.05219	0	0.0416667	849.271	3.13338	0.0149464	7
M_0.25_F_lqp_Set_56	2.07194	0	0.0416667	854.774	8.63603	0.000954226	6
M_0.25_F_lqp_Set_57	2.05394	0	0.0416667	852.831	6.69314	0.00252085	9
M_0.25_F_lqp_Set_6	2.00803	0	0.25	913.512	67.3742	1.67809e-16	4
M_0.25_F_lqp_Set_7	1.99059	0	0	873.755	27.617	7.21093e-08	5
M_0.25_F_lqp_Set_8	1.64244	0	0.0833333	893.935	47.7968	2.99231e-12	4
M_0.25_F_lqp_Set_9	1.71406	0	0.0416667	915.26	69.1218	7.00373e-17	4
M_0.25_F_lqpt_Set_1	1.97239	0	0.333333	1150.65	304.509	5.3904e-68	38
M_0.25_F_lqpt_Set_10	2.99577	0	0.0833333	958.923	112.785	2.31258e-26	25
M_0.25_F_lqpt_Set_11	1.82653	0	0.25	1384.14	538.002	1.06982e-118	41
M_0.25_F_lqpt_Set_12	1.8219	0	0.208333	1005.18	159.043	2.08534e-36	31
M_0.25_F_lqpt_Set_13	1.81674	0	0.25	1350.85	504.709	1.81499e-111	41
M_0.25_F_lqpt_Set_14	1.96575	0	0.125	1162.56	316.423	1.39524e-70	38
M_0.25_F_lqpt_Set_15	1.77467	0	0.208333	5389.93	4543.79	0	47
M_0.25_F_lqpt_Set_16	4.18989	0	0.5	5357.56	4511.42	0	47
M_0.25_F_lqpt_Set_17	1.98396	0	0.375	NA	NA	NA	58
M_0.25_F_lqpt_Set_18	1.50308	0	0.458333	NA	NA	NA	59
M_0.25_F_lqpt_Set_19	1.99104	0	0.541667	NA	NA	NA	53
M_0.25_F_lqpt_Set_2	14.1016	0	0.291667	997.963	151.825	7.70318e-35	31
M_0.25_F_lqpt_Set_20	2.15139	0	0.208333	1608.98	762.845	1.60434e-167	43
M_0.25_F_lqpt_Set_21	1.69748	0	0.333333	NA	NA	NA	55
M_0.25_F_lqpt_Set_22	2.16453	0	0.25	NA	NA	NA	49
M_0.25_F_lqpt_Set_23	1.7891	0	0.375	NA	NA	NA	55
M_0.25_F_lqpt_Set_24	1.87475	0	0.375	NA	NA	NA	55
M_0.25_F_lqpt_Set_25	1.71957	0	0.583333	NA	NA	NA	62
M_0.25_F_lqpt_Set_26	1.99437	0	0.0416667	NA	NA	NA	48
M_0.25_F_lqpt_Set_27	1.68881	0	0.291667	NA	NA	NA	60
M_0.25_F_lqpt_Set_28	1.99231	0	0.25	NA	NA	NA	51
M_0.25_F_lqpt_Set_29	1.77469	0	0.291667	NA	NA	NA	59
M_0.25_F_lqpt_Set_3	1.66848	0	0.208333	1045.3	199.158	4.05788e-45	35
M_0.25_F_lqpt_Set_30	1.97993	0	0.291667	5361.26	4515.12	0	47
M_0.25_F_lqpt_Set_31	1.71972	0	0.458333	NA	NA	NA	57
M_0.25_F_lqpt_Set_32	1.90565	0	0.166667	NA	NA	NA	49
M_0.25_F_lqpt_Set_33	1.94367	0	0.125	3021.65	2175.51	0	46
M_0.25_F_lqpt_Set_34	1.82166	0	0.208333	NA	NA	NA	57
M_0.25_F_lqpt_Set_35	1.83812	0	0.208333	NA	NA	NA	55
M_0.25_F_lqpt_Set_36	2.03245	0	0.416667	NA	NA	NA	63
M_0.25_F_lqpt_Set_37	1.67975	0	0.583333	NA	NA	NA	71
M_0.25_F_lqpt_Set_38	1.99484	0	0.5	NA	NA	NA	61
M_0.25_F_lqpt_Set_39	1.6661	0	0.5	NA	NA	NA	72
M_0.25_F_lqpt_Set_4	1.54474	0	0.291667	1621.26	775.118	3.46946e-170	43
M_0.25_F_lqpt_Set_40	2.03347	0	0.416667	NA	NA	NA	68
M_0.25_F_lqpt_Set_41	1.57933	0	0.791667	NA	NA	NA	71
M_0.25_F_lqpt_Set_42	1.90046	0	0.291667	NA	NA	NA	65
M_0.25_F_lqpt_Set_43	2.22107	0	0.166667	NA	NA	NA	63
M_0.25_F_lqpt_Set_44	1.7152	0	0.541667	NA	NA	NA	67
M_0.25_F_lqpt_Set_45	1.85375	0	0.291667	NA	NA	NA	73
M_0.25_F_lqpt_Set_46	1.77421	0	0.333333	NA	NA	NA	68
M_0.25_F_lqpt_Set_47	1.98831	0	0.25	NA	NA	NA	62
M_0.25_F_lqpt_Set_48	1.66651	0	0.458333	NA	NA	NA	72
M_0.25_F_lqpt_Set_49	1.73963	0	0.333333	NA	NA	NA	71
M_0.25_F_lqpt_Set_5	2.01179	0	0.25	1202.79	356.65	2.56703e-79	39
M_0.25_F_lqpt_Set_50	1.90746	0	0.125	NA	NA	NA	64
M_0.25_F_lqpt_Set_51	1.75961	0	0.416667	NA	NA	NA	80
M_0.25_F_lqpt_Set_52	2.02159	0	0.333333	NA	NA	NA	75
M_0.25_F_lqpt_Set_53	1.64826	0	0.708333	NA	NA	NA	80
M_0.25_F_lqpt_Set_54	1.6951	0	0.625	NA	NA	NA	86
M_0.25_F_lqpt_Set_55	1.90368	0	0.208333	NA	NA	NA	83
M_0.25_F_lqpt_Set_56	1.71195	0	0.416667	NA	NA	NA	75
M_0.25_F_lqpt_Set_57	1.77584	0	0.5	NA	NA	NA	91
M_0.25_F_lqpt_Set_6	2.00546	0	0.166667	1085.33	239.193	8.22083e-54	35
M_0.25_F_lqpt_Set_7	1.9774	0	0.0416667	1115.32	269.183	2.52687e-60	37
M_0.25_F_lqpt_Set_8	1.72932	0	0.208333	3033.32	2187.18	0	46
M_0.25_F_lqpt_Set_9	1.91013	0	0.208333	1501.59	655.45	3.35511e-144	42
M_0.25_F_lqpth_Set_1	1.74931	0	0.333333	2233.75	1387.62	3.44956e-303	45
M_0.25_F_lqpth_Set_10	2.68268	0	0.0833333	983.235	137.097	1.21531e-31	28
M_0.25_F_lqpth_Set_11	1.82321	0	0.375	1382.86	536.726	2.02519e-118	41
M_0.25_F_lqpth_Set_12	2.17922	0	0.291667	1151.95	305.808	2.81514e-68	37
M_0.25_F_lqpth_Set_13	1.82291	0	0.125	2237.83	1391.7	4.48825e-304	45
M_0.25_F_lqpth_Set_14	2.15541	0	0.25	1857.31	1011.18	1.90977e-221	44
M_0.25_F_lqpth_Set_15	1.90767	0	0.333333	NA	NA	NA	49
M_0.25_F_lqpth_Set_16	1.99989	0	0.416667	NA	NA	NA	53
M_0.25_F_lqpth_Set_17	1.77582	0	0.375	NA	NA	NA	62
M_0.25_F_lqpth_Set_18	1.76475	0	0.708333	NA	NA	NA	65
M_0.25_F_lqpth_Set_19	1.69268	0	0.458333	NA	NA	NA	58
M_0.25_F_lqpth_Set_2	3.2009	0	0.333333	1049.15	203.017	5.89348e-46	34
M_0.25_F_lqpth_Set_20	1.81455	0	0.333333	3012.32	2166.18	0	46
M_0.25_F_lqpth_Set_21	2.04675	0	0.375	NA	NA	NA	59
M_0.25_F_lqpth_Set_22	2.05734	0	0.166667	NA	NA	NA	54
M_0.25_F_lqpth_Set_23	2.05596	0	0.375	NA	NA	NA	63
M_0.25_F_lqpth_Set_24	1.7795	0	0.375	NA	NA	NA	59
M_0.25_F_lqpth_Set_25	1.9972	0	0.5	NA	NA	NA	66
M_0.25_F_lqpth_Set_26	1.79994	0	0.291667	NA	NA	NA	51
M_0.25_F_lqpth_Set_27	1.80128	0	0.5	NA	NA	NA	62
M_0.25_F_lqpth_Set_28	1.81845	0	0.416667	NA	NA	NA	55
M_0.25_F_lqpth_Set_29	1.75552	0	0.5	NA	NA	NA	63
M_0.25_F_lqpth_Set_3	1.71528	0	0.375	1264.61	418.474	9.64684e-93	40
M_0.25_F_lqpth_Set_30	1.78495	0	0.416667	NA	NA	NA	57
M_0.25_F_lqpth_Set_31	1.63134	0	0.458333	NA	NA	NA	61
M_0.25_F_lqpth_Set_32	2.07856	0	0.25	NA	NA	NA	55
M_0.25_F_lqpth_Set_33	2.00884	0	0.25	NA	NA	NA	50
M_0.25_F_lqpth_Set_34	2.04618	0	0.416667	NA	NA	NA	55
M_0.25_F_lqpth_Set_35	1.81912	0	0.208333	NA	NA	NA	62
M_0.25_F_lqpth_Set_36	1.73778	0	0.458333	NA	NA	NA	65
M_0.25_F_lqpth_Set_37	1.81991	0	0.5	NA	NA	NA	72
M_0.25_F_lqpth_Set_38	1.73059	0	0.458333	NA	NA	NA	63
M_0.25_F_lqpth_Set_39	1.87669	0	0.541667	NA	NA	NA	83
M_0.25_F_lqpth_Set_4	1.67374	0	0.375	5372.77	4526.63	0	47
M_0.25_F_lqpth_Set_40	1.68238	0	0.416667	NA	NA	NA	73
M_0.25_F_lqpth_Set_41	1.73009	0	0.791667	NA	NA	NA	81
M_0.25_F_lqpth_Set_42	2.09817	0	0.5	NA	NA	NA	70
M_0.25_F_lqpth_Set_43	1.90119	0	0.25	NA	NA	NA	67
M_0.25_F_lqpth_Set_44	2.08098	0	0.5	NA	NA	NA	77
M_0.25_F_lqpth_Set_45	1.98947	0	0.541667	NA	NA	NA	83
M_0.25_F_lqpth_Set_46	1.91066	0	0.625	NA	NA	NA	69
M_0.25_F_lqpth_Set_47	1.7763	0	0.416667	NA	NA	NA	68
M_0.25_F_lqpth_Set_48	1.72242	0	0.625	NA	NA	NA	73
M_0.25_F_lqpth_Set_49	1.76645	0	0.5	NA	NA	NA	77
M_0.25_F_lqpth_Set_5	1.90959	0	0.333333	1610.18	764.046	8.79793e-168	43
M_0.25_F_lqpth_Set_50	2.04632	0	0.208333	NA	NA	NA	71
M_0.25_F_lqpth_Set_51	1.82587	0	0.416667	NA	NA	NA	85
M_0.25_F_lqpth_Set_52	1.65476	0	0.5	NA	NA	NA	79
M_0.25_F_lqpth_Set_53	1.72301	0	0.541667	NA	NA	NA	88
M_0.25_F_lqpth_Set_54	1.87207	0	0.625	NA	NA	NA	97
M_0.25_F_lqpth_Set_55	2.15274	0	0.5	NA	NA	NA	89
M_0.25_F_lqpth_Set_56	1.79072	0	0.458333	NA	NA	NA	83
M_0.25_F_lqpth_Set_57	1.86881	0	0.583333	NA	NA	NA	98
M_0.25_F_lqpth_Set_6	2.07291	0	0.25	1307.11	460.973	5.69968e-102	40
M_0.25_F_lqpth_Set_7	1.95649	0	0.166667	1617.25	771.108	2.57662e-169	43
M_0.25_F_lqpth_Set_8	1.84566	0	0.375	NA	NA	NA	52
M_0.25_F_lqpth_Set_9	1.63981	0	0.25	3063.74	2217.6	0	46
M_0.25_F_lqph_Set_1	1.93625	0	0.125	NA	NA	NA	55
M_0.25_F_lqph_Set_10	10.0008	0	0.208333	941.799	95.6608	1.20911e-22	18
M_0.25_F_lqph_Set_11	1.86075	0	0.25	986.606	140.468	2.25298e-32	27
M_0.25_F_lqph_Set_12	2.1484	0	0.125	935.634	89.4965	2.63654e-21	19
M_0.25_F_lqph_Set_13	1.81689	0	0.0833333	950.973	104.835	1.23112e-24	26
M_0.25_F_lqph_Set_14	2.0886	0	0.0833333	908.369	62.2312	2.19586e-15	20
M_0.25_F_lqph_Set_15	1.76296	0	0.0416667	973.34	127.202	1.71167e-29	27
M_0.25_F_lqph_Set_16	1.98108	0	0.125	NA	NA	NA	49
M_0.25_F_lqph_Set_17	1.97363	0	0.0416667	NA	NA	NA	57
M_0.25_F_lqph_Set_18	1.69135	0	0.166667	NA	NA	NA	63
M_0.25_F_lqph_Set_19	1.75225	0	0.208333	NA	NA	NA	56
M_0.25_F_lqph_Set_2	3.26524	0	0.125	1016.79	170.656	6.27258e-39	30
M_0.25_F_lqph_Set_20	2.02859	0	0.0416667	1187.26	341.122	6.04352e-76	38
M_0.25_F_lqph_Set_21	1.95777	0	0.208333	2294.75	1448.61	1.96287370080208e-316	45
M_0.25_F_lqph_Set_22	2.17557	0	0.125	1072.98	226.84	3.95639e-51	35
M_0.25_F_lqph_Set_23	1.9547	0	0.0833333	1379.6	533.465	1.03391e-117	41
M_0.25_F_lqph_Set_24	1.9247	0	0.0416667	1237.01	390.871	9.51233e-87	39
M_0.25_F_lqph_Set_25	1.99593	0	0.0416667	2277.01	1430.87	1.39468799144443e-312	45
M_0.25_F_lqph_Set_26	1.74442	0	0.0833333	1052.68	206.538	1.01347e-46	34
M_0.25_F_lqph_Set_27	1.95471	0	0.166667	NA	NA	NA	48
M_0.25_F_lqph_Set_28	1.93332	0	0.291667	NA	NA	NA	52
M_0.25_F_lqph_Set_29	1.86992	0	0.166667	NA	NA	NA	52
M_0.25_F_lqph_Set_3	1.97196	0	0.0833333	1122.51	276.368	6.95596e-62	36
M_0.25_F_lqph_Set_30	1.91126	0	0.166667	1665.78	819.642	7.44506e-180	43
M_0.25_F_lqph_Set_31	1.71502	0	0.208333	NA	NA	NA	56
M_0.25_F_lqph_Set_32	2.03353	0	0.125	1012.81	166.675	4.59033e-38	32
M_0.25_F_lqph_Set_33	2.03325	0	0.0833333	945.397	99.2589	2.00055e-23	27
M_0.25_F_lqph_Set_34	1.86512	0	0.166667	981.675	135.537	2.6512e-31	29
M_0.25_F_lqph_Set_35	1.77077	0	0.0833333	1011.81	165.673	7.57592e-38	31
M_0.25_F_lqph_Set_36	1.98232	0	0.0833333	NA	NA	NA	57
M_0.25_F_lqph_Set_37	1.824	0	0.25	NA	NA	NA	68
M_0.25_F_lqph_Set_38	1.82414	0	0.291667	NA	NA	NA	52
M_0.25_F_lqph_Set_39	1.93415	0	0.125	NA	NA	NA	64
M_0.25_F_lqph_Set_4	2.19306	0	0.25	1267.54	421.399	2.23502e-93	39
M_0.25_F_lqph_Set_40	1.79988	0	0.0833333	NA	NA	NA	68
M_0.25_F_lqph_Set_41	1.74125	0	0.166667	NA	NA	NA	71
M_0.25_F_lqph_Set_42	2.08615	0	0.0833333	3046.28	2200.14	0	46
M_0.25_F_lqph_Set_43	1.91022	0	0.0833333	NA	NA	NA	49
M_0.25_F_lqph_Set_44	1.92635	0	0.125	NA	NA	NA	53
M_0.25_F_lqph_Set_45	1.95971	0	0.0833333	1646.51	800.375	1.13701e-175	43
M_0.25_F_lqph_Set_46	2.0596	0	0.166667	5412.25	4566.11	0	47
M_0.25_F_lqph_Set_47	1.85637	0	0.291667	1650.02	803.883	1.96806e-176	43
M_0.25_F_lqph_Set_48	1.87802	0	0.208333	5421.22	4575.08	0	47
M_0.25_F_lqph_Set_49	1.85795	0	0.25	NA	NA	NA	56
M_0.25_F_lqph_Set_5	1.831	0	0.0416667	992.831	146.693	1.00245e-33	30
M_0.25_F_lqph_Set_50	1.96582	0	0.125	1030.72	184.578	5.94728e-42	33
M_0.25_F_lqph_Set_51	1.92937	0	0.125	NA	NA	NA	73
M_0.25_F_lqph_Set_52	1.81107	0	0.125	NA	NA	NA	50
M_0.25_F_lqph_Set_53	1.91352	0	0.166667	NA	NA	NA	75
M_0.25_F_lqph_Set_54	1.93944	0	0.0833333	NA	NA	NA	62
M_0.25_F_lqph_Set_55	2.1503	0	0.0833333	2261.98	1415.85	0	45
M_0.25_F_lqph_Set_56	1.94012	0	0.291667	5410	4563.86	0	47
M_0.25_F_lqph_Set_57	1.9226	0	0.166667	NA	NA	NA	66
M_0.25_F_lqph_Set_6	2.09526	0	0.25	1288.83	442.689	5.32467e-98	39
M_0.25_F_lqph_Set_7	1.85551	0	0.0416667	1125.24	279.1	1.77515e-62	36
M_0.25_F_lqph_Set_8	1.70208	0	0.0833333	NA	NA	NA	50
M_0.25_F_lqph_Set_9	1.96873	0	0.25	2345.28	1499.14	0	45
M_0.5_F_lq_Set_1	1.96795	0	0.0416667	875.119	28.9807	3.6464e-08	4
M_0.5_F_lq_Set_10	2.00064	0	0.0833333	904.254	58.1157	1.71898e-14	3
M_0.5_F_lq_Set_11	1.81778	0	0.166667	893.837	47.6987	3.14262e-12	3
M_0.5_F_lq_Set_12	1.99765	0	0.0416667	897.262	51.1236	5.67004e-13	2
M_0.5_F_lq_Set_13	1.73098	0	0.0416667	858.702	12.5635	0.000133907	4
M_0.5_F_lq_Set_14	1.98824	0	0.0416667	861.287	15.1485	3.67687e-05	4
M_0.5_F_lq_Set_15	1.7004	0	0.0833333	889.719	43.5808	2.46318e-11	4
M_0.5_F_lq_Set_16	1.99663	0	0	867.127	20.9888	1.98285e-06	6
M_0.5_F_lq_Set_17	1.99263	0	0	857.655	11.5168	0.000225997	5
M_0.5_F_lq_Set_18	2.02157	0	0.0833333	875.378	29.24	3.20307e-08	6
M_0.5_F_lq_Set_19	1.97302	0	0.0416667	866.029	19.8911	3.43286e-06	4
M_0.5_F_lq_Set_2	1.99908	0	0.166667	892.188	46.0504	7.16509e-12	3
M_0.5_F_lq_Set_20	1.9975	0	0	855.207	9.06937	0.000768338	4
M_0.5_F_lq_Set_21	2.12383	0	0.208333	879.528	33.3899	4.02182e-09	5
M_0.5_F_lq_Set_22	2.02403	0	0.125	856.591	10.4532	0.000384642	5
M_0.5_F_lq_Set_23	2.02252	0	0.0416667	854.517	8.37916	0.001085	6
M_0.5_F_lq_Set_24	1.98572	0	0.0416667	851.601	5.46289	0.00466327	5
M_0.5_F_lq_Set_25	2.02633	0	0.0833333	856.635	10.4967	0.000376374	5
M_0.5_F_lq_Set_26	2.00898	0	0	865.056	18.9181	5.58368e-06	5
M_0.5_F_lq_Set_27	1.78202	0	0.125	879.602	33.4642	3.8752e-09	4
M_0.5_F_lq_Set_28	2.00283	0	0.125	900.294	54.1563	1.24466e-13	5
M_0.5_F_lq_Set_29	1.77998	0	0.0416667	861.173	15.0348	3.89211e-05	5
M_0.5_F_lq_Set_3	1.9965	0	0	858.055	11.9165	0.000185058	4
M_0.5_F_lq_Set_30	1.99887	0	0.0416667	860.888	14.75	4.48763e-05	4
M_0.5_F_lq_Set_31	1.70602	0	0.0833333	885.719	39.5809	1.81997e-10	4
M_0.5_F_lq_Set_32	2.07604	0	0.0833333	853.109	6.97069	0.00219419	5
M_0.5_F_lq_Set_33	2.01448	0	0.0416667	855.563	9.42525	0.000643096	5
M_0.5_F_lq_Set_34	1.76355	0	0.0833333	875.493	29.3551	3.02388e-08	4
M_0.5_F_lq_Set_35	1.77895	0	0.0416667	858.702	12.5637	0.000133897	4
M_0.5_F_lq_Set_36	1.99469	0	0	852.171	6.03332	0.00350609	6
M_0.5_F_lq_Set_37	2.0823	0	0.0416667	861.934	15.7963	2.65968e-05	6
M_0.5_F_lq_Set_38	2.02339	0	0.0833333	856.683	10.5446	0.000367458	6
M_0.5_F_lq_Set_39	2.02352	0	0.0416667	858.786	12.648	0.000128371	8
M_0.5_F_lq_Set_4	2.06506	0	0.0833333	886.309	40.1709	1.35502e-10	4
M_0.5_F_lq_Set_40	1.99772	0	0.0416667	853.898	7.76012	0.00147861	6
M_0.5_F_lq_Set_41	2.00947	0	0.0416667	860.635	14.4973	5.09197e-05	7
M_0.5_F_lq_Set_42	2.05296	0	0.0416667	849.59	3.45187	0.0127461	7
M_0.5_F_lq_Set_43	2.02926	0	0.0416667	846.25	0.112172	0.0676993	6
M_0.5_F_lq_Set_44	2.06553	0	0.125	849.57	3.43191	0.0128739	6
M_0.5_F_lq_Set_45	2.02	0	0.0416667	854.502	8.36364	0.00109345	6
M_0.5_F_lq_Set_46	1.80617	0	0.0416667	858.057	11.9187	0.000184852	7
M_0.5_F_lq_Set_47	2.00974	0	0.0833333	858.731	12.5929	0.000131959	6
M_0.5_F_lq_Set_48	1.80249	0	0.0416667	870.751	24.6134	3.23743e-07	5
M_0.5_F_lq_Set_49	1.77838	0	0.0416667	861.152	15.0135	3.93371e-05	5
M_0.5_F_lq_Set_5	1.97477	0	0.0416667	867.585	21.4475	1.57645e-06	4
M_0.5_F_lq_Set_50	2.0769	0	0.0833333	853.022	6.88363	0.00229182	5
M_0.5_F_lq_Set_51	2.05191	0	0.0416667	850.963	4.82513	0.00641473	8
M_0.5_F_lq_Set_52	2.03269	0	0.0416667	848.776	2.63833	0.0191442	7
M_0.5_F_lq_Set_53	2.06635	0	0.0416667	851.929	5.79066	0.00395837	8
M_0.5_F_lq_Set_54	2.01994	0	0.0416667	858.96	12.8223	0.000117655	8
M_0.5_F_lq_Set_55	2.05314	0	0.0416667	849.556	3.41821	0.0129625	7
M_0.5_F_lq_Set_56	1.82886	0	0.0416667	857.903	11.7647	0.000199651	7
M_0.5_F_lq_Set_57	2.04465	0	0.0416667	850.944	4.80598	0.00647644	8
M_0.5_F_lq_Set_6	2.00892	0	0.25	911.065	64.9266	5.70578e-16	3
M_0.5_F_lq_Set_7	1.98897	0	0	872.192	26.0543	1.57519e-07	4
M_0.5_F_lq_Set_8	1.62574	0	0.0833333	894.88	48.7421	1.86522e-12	4
M_0.5_F_lq_Set_9	1.73248	0	0.0416667	913.091	66.9534	2.07109e-16	3
M_0.5_F_lp_Set_1	1.86811	0	0.0416667	899.358	53.2197	1.9881e-13	3
M_0.5_F_lp_Set_10	61.097	0	0.208333	944.345	98.2067	3.3856e-23	2
M_0.5_F_lp_Set_11	7.4322	0	0.0416667	928.254	82.1162	1.05591e-19	2
M_0.5_F_lp_Set_12	1.90244	0	0.0416667	898.229	52.0915	3.49479e-13	2
M_0.5_F_lp_Set_13	1.97249	0	0.0416667	879.511	33.3731	4.05571e-09	3
M_0.5_F_lp_Set_14	1.7622	0	0.0416667	910.975	64.8366	5.96839e-16	2
M_0.5_F_lp_Set_15	1.61903	0	0.0416667	913.408	67.2702	1.7677e-16	3
M_0.5_F_lp_Set_16	2.00452	0	0	879.714	33.5764	3.66366e-09	4
M_0.5_F_lp_Set_17	1.96556	0	0	874.989	28.8515	3.88981e-08	5
M_0.5_F_lp_Set_18	1.94011	0	0.0833333	887.57	41.4323	7.21172e-11	5
M_0.5_F_lp_Set_19	1.72906	0	0.0416667	901.486	55.3478	6.85992e-14	4
M_0.5_F_lp_Set_2	2.67265	0	0.0416667	938.146	92.0082	7.50967e-22	2
M_0.5_F_lp_Set_20	1.98473	0	0	876.916	30.7783	1.48426e-08	4
M_0.5_F_lp_Set_21	2.00344	0	0.208333	886.626	40.4882	1.15622e-10	4
M_0.5_F_lp_Set_22	1.90336	0	0.0416667	896.515	50.3766	8.23754e-13	3
M_0.5_F_lp_Set_23	1.99467	0	0.0416667	865.924	19.7863	3.6175e-06	5
M_0.5_F_lp_Set_24	1.97765	0	0.0416667	867.152	21.0142	1.95784e-06	5
M_0.5_F_lp_Set_25	1.98242	0	0.0416667	870.422	24.2841	3.81686e-07	5
M_0.5_F_lp_Set_26	2.06277	0	0	894.776	48.6378	1.96509e-12	4
M_0.5_F_lp_Set_27	2.00325	0	0.208333	892.331	46.1928	6.67271e-12	4
M_0.5_F_lp_Set_28	1.84465	0	0.0416667	897.901	51.7631	4.11844e-13	3
M_0.5_F_lp_Set_29	1.95412	0	0.0416667	880.871	34.7332	2.05461e-09	5
M_0.5_F_lp_Set_3	1.96181	0	0	876.266	30.1279	2.05473e-08	3
M_0.5_F_lp_Set_30	1.74899	0	0.0416667	894.027	47.8895	2.85678e-12	5
M_0.5_F_lp_Set_31	1.73979	0	0.0416667	894.43	48.292	2.33592e-12	5
M_0.5_F_lp_Set_32	1.99479	0	0.0416667	876.439	30.3006	1.88475e-08	5
M_0.5_F_lp_Set_33	1.93072	0	0.0416667	895.575	49.4366	1.31804e-12	3
M_0.5_F_lp_Set_34	1.92889	0	0.0416667	894.434	48.2963	2.33094e-12	4
M_0.5_F_lp_Set_35	1.67682	0	0.0416667	876.839	30.7006	1.54306e-08	5
M_0.5_F_lp_Set_36	1.98767	0	0	867.174	21.0365	1.93611e-06	6
M_0.5_F_lp_Set_37	2.00206	0	0.125	874.126	27.9883	5.98894e-08	6
M_0.5_F_lp_Set_38	1.85592	0	0.0416667	889.984	43.846	2.15725e-11	7
M_0.5_F_lp_Set_39	1.99128	0	0.0416667	867.927	21.7891	1.32891e-06	6
M_0.5_F_lp_Set_4	1.99399	0	0.0833333	896.125	49.9869	1.00096e-12	3
M_0.5_F_lp_Set_40	1.99451	0	0.0416667	869.068	22.9304	7.51065e-07	6
M_0.5_F_lp_Set_41	1.98426	0	0.0416667	872.815	26.6771	1.15368e-07	6
M_0.5_F_lp_Set_42	1.99801	0	0.0416667	860.517	14.3787	5.4032e-05	6
M_0.5_F_lp_Set_43	1.9977	0	0	862.13	15.9922	2.41147e-05	6
M_0.5_F_lp_Set_44	2.00485	0	0.0416667	864.762	18.6239	6.46866e-06	6
M_0.5_F_lp_Set_45	1.98818	0	0.0416667	863.899	17.7612	9.95763e-06	5
M_0.5_F_lp_Set_46	2.0018	0	0.0833333	870.136	23.9976	4.40479e-07	6
M_0.5_F_lp_Set_47	1.91538	0	0.0416667	877.854	31.7161	9.28702e-09	6
M_0.5_F_lp_Set_48	2.00255	0	0.0416667	876.9	30.7619	1.49655e-08	5
M_0.5_F_lp_Set_49	1.72291	0	0.0416667	879.453	33.3153	4.17457e-09	6
M_0.5_F_lp_Set_5	1.64217	0	0.0416667	914.307	68.169	1.12778e-16	2
M_0.5_F_lp_Set_50	2.00313	0	0.0416667	874.363	28.225	5.3206e-08	7
M_0.5_F_lp_Set_51	2.00067	0	0.0833333	869.17	23.0319	7.1387e-07	9
M_0.5_F_lp_Set_52	2.00535	0	0.0416667	863.87	17.7317	1.01055e-05	7
M_0.5_F_lp_Set_53	2.00289	0	0.0416667	867.146	21.0083	1.96356e-06	7
M_0.5_F_lp_Set_54	1.99474	0	0.0416667	866.233	20.0952	3.09969e-06	6
M_0.5_F_lp_Set_55	2.00127	0	0.0416667	860.792	14.6544	4.70746e-05	7
M_0.5_F_lp_Set_56	2.00424	0	0.0416667	871.637	25.4991	2.07916e-07	7
M_0.5_F_lp_Set_57	2.00125	0	0.0833333	863.56	17.4218	1.17992e-05	8
M_0.5_F_lp_Set_6	5.09693	0	0.0416667	924.732	78.5944	6.14296e-19	2
M_0.5_F_lp_Set_7	1.88378	0	0	899.692	53.5545	1.68165e-13	3
M_0.5_F_lp_Set_8	2.00091	0	0.0833333	909.217	63.0788	1.43733e-15	3
M_0.5_F_lp_Set_9	1.70705	0	0.0416667	913.939	67.8008	1.35576e-16	2
M_0.5_F_q_Set_1	1.67102	0	0.166667	937.103	90.9648	1.26527e-21	1
M_0.5_F_q_Set_10	8.09447	0	0.166667	942.157	96.0192	1.01073e-22	2
M_0.5_F_q_Set_11	1.74931	0	0.125	894.068	47.9296	2.79998e-12	2
M_0.5_F_q_Set_12	1.99773	0	0.0416667	897.435	51.2969	5.19939e-13	2
M_0.5_F_q_Set_13	1.73865	0	0.0416667	881.302	35.1644	1.65613e-09	2
M_0.5_F_q_Set_14	1.74655	0	0.0416667	907.089	60.9509	4.16516e-15	2
M_0.5_F_q_Set_15	1.70663	0	0.0416667	901.458	55.3202	6.95519e-14	2
M_0.5_F_q_Set_16	6.25954	0	0.0416667	937.012	90.8743	1.32385e-21	3
M_0.5_F_q_Set_17	1.8115	0	0	911.339	65.2006	4.97526e-16	3
M_0.5_F_q_Set_18	1.74076	0	0.0416667	892.69	46.5522	5.57508e-12	3
M_0.5_F_q_Set_19	1.71761	0	0.0416667	914.316	68.1779	1.12277e-16	3
M_0.5_F_q_Set_2	6.45557	0	0.0833333	942.495	96.3566	8.53837e-23	2
M_0.5_F_q_Set_20	2.04995	0	0	904.392	58.2537	1.60438e-14	3
M_0.5_F_q_Set_21	1.80142	0	0.208333	892.006	45.8682	7.84871e-12	3
M_0.5_F_q_Set_22	1.90172	0	0.0416667	895.508	49.3705	1.36232e-12	3
M_0.5_F_q_Set_23	1.69921	0	0.0416667	878.735	32.597	5.97847e-09	3
M_0.5_F_q_Set_24	1.71727	0	0.0416667	904.18	58.0419	1.78361e-14	3
M_0.5_F_q_Set_25	1.70484	0	0.0833333	896.832	50.6938	7.02949e-13	3
M_0.5_F_q_Set_26	2.55395	0	0.0416667	924.28	78.1419	7.70284e-19	3
M_0.5_F_q_Set_27	1.76803	0	0.0833333	893.062	46.9238	4.62996e-12	3
M_0.5_F_q_Set_28	1.90917	0	0.0833333	897.14	51.002	6.02553e-13	3
M_0.5_F_q_Set_29	1.74243	0	0.0416667	879.148	33.0098	4.86362e-09	3
M_0.5_F_q_Set_3	1.94343	0	0	909.123	62.9854	1.50605e-15	2
M_0.5_F_q_Set_30	1.73572	0	0.0416667	909.357	63.2194	1.33977e-15	3
M_0.5_F_q_Set_31	1.70605	0	0.0416667	901.458	55.3202	6.95519e-14	2
M_0.5_F_q_Set_32	1.85315	0	0.125	871.443	25.3053	2.29067e-07	3
M_0.5_F_q_Set_33	1.93345	0	0.0416667	890.948	44.8103	1.33202e-11	3
M_0.5_F_q_Set_34	2.10933	0	0.0416667	887.636	41.4977	6.97963e-11	3
M_0.5_F_q_Set_35	1.68487	0	0.0833333	883.489	37.3507	5.55067e-10	3
M_0.5_F_q_Set_36	2.05506	0	0	906.728	60.5904	4.98786e-15	4
M_0.5_F_q_Set_37	1.80615	0	0.0416667	880.075	33.9367	3.05978e-09	4
M_0.5_F_q_Set_38	1.88372	0	0.0416667	897.757	51.619	4.42618e-13	4
M_0.5_F_q_Set_39	1.70231	0	0.0416667	880.447	34.3085	2.54067e-09	4
M_0.5_F_q_Set_4	1.69128	0	0.0833333	900.291	54.1525	1.24702e-13	2
M_0.5_F_q_Set_40	1.76708	0	0.0416667	904.77	58.6319	1.32796e-14	4
M_0.5_F_q_Set_41	1.7572	0	0.0416667	894.853	48.7152	1.8905e-12	4
M_0.5_F_q_Set_42	1.81167	0	0.0833333	866.147	20.0091	3.23613e-06	4
M_0.5_F_q_Set_43	1.94176	0	0.0416667	891.385	45.247	1.07074e-11	4
M_0.5_F_q_Set_44	1.74092	0	0.0416667	883.869	37.7308	4.58996e-10	4
M_0.5_F_q_Set_45	1.753	0	0.0833333	880.661	34.5231	2.28215e-09	4
M_0.5_F_q_Set_46	1.83887	0	0.0416667	865.403	19.2645	4.6958e-06	4
M_0.5_F_q_Set_47	1.81928	0	0.0416667	893.26	47.122	4.19311e-12	4
M_0.5_F_q_Set_48	2.10651	0	0.0416667	889.997	43.8589	2.14338e-11	4
M_0.5_F_q_Set_49	1.71531	0	0.0416667	879.345	33.2072	4.40656e-09	4
M_0.5_F_q_Set_5	1.735	0	0.0416667	912.083	65.9455	3.42822e-16	2
M_0.5_F_q_Set_50	1.84407	0	0.125	872.305	26.1669	1.48895e-07	4
M_0.5_F_q_Set_51	1.8599	0	0.0416667	866.919	20.7812	2.19975e-06	5
M_0.5_F_q_Set_52	1.91517	0	0.0833333	891.578	45.4398	9.72313e-12	5
M_0.5_F_q_Set_53	1.77625	0	0.0416667	881.647	35.5094	1.39374e-09	5
M_0.5_F_q_Set_54	1.72821	0	0.0416667	880.772	34.6338	2.15928e-09	5
M_0.5_F_q_Set_55	1.80592	0	0.125	866.147	20.0091	3.23609e-06	4
M_0.5_F_q_Set_56	1.80966	0	0.0416667	866.269	20.1313	3.04426e-06	5
M_0.5_F_q_Set_57	2.09885	0	0.0416667	867.767	21.6292	1.43956e-06	6
M_0.5_F_q_Set_6	5.72087	0	0.0416667	934.757	88.6185	4.08949e-21	2
M_0.5_F_q_Set_7	1.93632	0	0	928.606	82.4681	8.85557e-20	2
M_0.5_F_q_Set_8	1.65923	0	0.0416667	904.896	58.7577	1.24703e-14	2
M_0.5_F_q_Set_9	1.72575	0	0.0416667	913.068	66.9302	2.09524e-16	2
M_0.5_F_qp_Set_1	1.64735	0	0.166667	936.935	90.7973	1.37583e-21	2
M_0.5_F_qp_Set_10	7.71087	0	0.166667	927.815	81.6769	1.31531e-19	3
M_0.5_F_qp_Set_11	1.79019	0	0.166667	894.552	48.4144	2.19728e-12	3
M_0.5_F_qp_Set_12	1.87345	0	0.0416667	899.799	53.6606	1.59475e-13	3
M_0.5_F_qp_Set_13	1.73108	0	0.0416667	883.603	37.4648	5.24278e-10	3
M_0.5_F_qp_Set_14	1.7274	0	0.0416667	891.328	45.19	1.10166e-11	3
M_0.5_F_qp_Set_15	1.58411	0	0.0833333	884.026	37.8883	4.24234e-10	3
M_0.5_F_qp_Set_16	4.18897	0	0.0416667	905.651	59.5134	8.54627e-15	5
M_0.5_F_qp_Set_17	1.94724	0	0	910.152	64.0143	9.00357e-16	3
M_0.5_F_qp_Set_18	1.69893	0	0.0833333	888.254	42.1156	5.12459e-11	4
M_0.5_F_qp_Set_19	1.66521	0	0.0416667	904.434	58.2962	1.57066e-14	4
M_0.5_F_qp_Set_2	2.36903	0	0.0833333	935.787	89.6493	2.44258e-21	3
M_0.5_F_qp_Set_20	2.12945	0	0	891.942	45.8043	8.10351e-12	4
M_0.5_F_qp_Set_21	1.7835	0	0.166667	894.443	48.3052	2.32065e-12	4
M_0.5_F_qp_Set_22	1.92372	0	0.0416667	886.844	40.7065	1.03668e-10	6
M_0.5_F_qp_Set_23	1.72465	0	0.0416667	880.878	34.7395	2.04809e-09	4
M_0.5_F_qp_Set_24	1.92321	0	0.0416667	888.917	42.7792	3.67755e-11	4
M_0.5_F_qp_Set_25	2.08568	0	0.0833333	885.508	39.3699	2.02243e-10	5
M_0.5_F_qp_Set_26	2.06595	0	0	890.247	44.1094	1.89111e-11	5
M_0.5_F_qp_Set_27	1.75164	0	0.125	884.673	38.5348	3.07056e-10	5
M_0.5_F_qp_Set_28	1.8696	0	0.0416667	897.433	51.2949	5.20477e-13	4
M_0.5_F_qp_Set_29	1.72293	0	0.0416667	880.27	34.132	2.77506e-09	5
M_0.5_F_qp_Set_3	1.94724	0	0	910.105	63.9667	9.22045e-16	3
M_0.5_F_qp_Set_30	1.73431	0	0.0416667	893.493	47.3552	3.73155e-12	5
M_0.5_F_qp_Set_31	1.71658	0	0.0833333	881.597	35.4593	1.4291e-09	5
M_0.5_F_qp_Set_32	1.78905	0	0.125	868.366	22.2276	1.06726e-06	5
M_0.5_F_qp_Set_33	1.93071	0	0.0416667	876.226	30.0879	2.09621e-08	6
M_0.5_F_qp_Set_34	1.76888	0	0.0416667	867.399	21.2605	1.73095e-06	3
M_0.5_F_qp_Set_35	1.71664	0	0.0416667	883.543	37.4055	5.40071e-10	3
M_0.5_F_qp_Set_36	2.1294	0	0	889.38	43.2418	2.91806e-11	6
M_0.5_F_qp_Set_37	1.72984	0	0.0833333	878.319	32.1808	7.36169e-09	6
M_0.5_F_qp_Set_38	1.90721	0	0.0416667	888.37	42.2321	4.83446e-11	7
M_0.5_F_qp_Set_39	1.71569	0	0.0416667	877.977	31.8385	8.73579e-09	6
M_0.5_F_qp_Set_4	1.68589	0	0.0833333	901.521	55.3827	6.74126e-14	3
M_0.5_F_qp_Set_40	1.86602	0	0.0416667	892.405	46.2672	6.42918e-12	6
M_0.5_F_qp_Set_41	1.67453	0	0.0416667	882.748	36.6105	8.03676e-10	7
M_0.5_F_qp_Set_42	1.78176	0	0.0833333	866.002	19.8639	3.47982e-06	6
M_0.5_F_qp_Set_43	1.95821	0	0.0416667	874.508	28.3701	4.9482e-08	7
M_0.5_F_qp_Set_44	1.8116	0	0.0833333	864.849	18.7106	6.19428e-06	5
M_0.5_F_qp_Set_45	1.66476	0	0.0833333	880.871	34.7332	2.05463e-09	4
M_0.5_F_qp_Set_46	1.82222	0	0.0416667	870.541	24.4032	3.59621e-07	7
M_0.5_F_qp_Set_47	1.93411	0	0.0416667	880.406	34.2683	2.59227e-09	8
M_0.5_F_qp_Set_48	2.08071	0	0.0416667	868.368	22.2297	1.06617e-06	6
M_0.5_F_qp_Set_49	1.682	0	0.0416667	880.269	34.1308	2.77668e-09	5
M_0.5_F_qp_Set_5	1.695	0	0.0416667	905.943	59.805	7.38654e-15	3
M_0.5_F_qp_Set_50	1.79151	0	0.125	868.364	22.2256	1.06833e-06	5
M_0.5_F_qp_Set_51	1.80596	0	0.0833333	870.464	24.3262	3.73749e-07	8
M_0.5_F_qp_Set_52	1.9385	0	0.0416667	874.299	28.1614	5.49259e-08	7
M_0.5_F_qp_Set_53	2.06632	0	0.0416667	864.879	18.7412	6.10017e-06	6
M_0.5_F_qp_Set_54	1.73544	0	0.0833333	876.362	30.2244	1.95791e-08	6
M_0.5_F_qp_Set_55	1.79805	0	0.125	868.645	22.5067	9.28261e-07	7
M_0.5_F_qp_Set_56	1.82273	0	0.0833333	870.481	24.3431	3.70608e-07	7
M_0.5_F_qp_Set_57	1.80993	0	0.0416667	867.578	21.4395	1.58272e-06	7
M_0.5_F_qp_Set_6	3.2835	0	0.0416667	917.42	71.2819	2.37838e-17	3
M_0.5_F_qp_Set_7	1.87208	0	0	922.663	76.5248	1.72897e-18	3
M_0.5_F_qp_Set_8	1.55867	0	0.0833333	897.148	51.0103	6.00058e-13	3
M_0.5_F_qp_Set_9	1.68499	0	0.0416667	913.24	67.1021	1.92271e-16	2
M_0.5_F_lqp_Set_1	1.95608	0	0.0416667	882.625	36.4866	8.55031e-10	4
M_0.5_F_lqp_Set_10	2.2037	0	0.125	908.719	62.5814	1.84316e-15	2
M_0.5_F_lqp_Set_11	1.77431	0	0.166667	893.954	47.8157	2.96414e-12	3
M_0.5_F_lqp_Set_12	1.87773	0	0.0416667	899.7	53.5619	1.67541e-13	3
M_0.5_F_lqp_Set_13	1.69111	0	0.0416667	864.916	18.7779	5.98929e-06	4
M_0.5_F_lqp_Set_14	1.98006	0	0.0416667	867.543	21.4053	1.61008e-06	4
M_0.5_F_lqp_Set_15	2.05246	0	0.0833333	882.832	36.6938	7.70882e-10	4
M_0.5_F_lqp_Set_16	2.00277	0	0	872.166	26.0278	1.59615e-07	5
M_0.5_F_lqp_Set_17	1.97299	0	0	865.957	19.8189	3.55901e-06	5
M_0.5_F_lqp_Set_18	1.99852	0	0.0833333	883.82	37.682	4.70319e-10	6
M_0.5_F_lqp_Set_19	1.95987	0	0.0416667	873.209	27.0706	9.47626e-08	4
M_0.5_F_lqp_Set_2	2.12482	0	0.125	900.47	54.332	1.13998e-13	3
M_0.5_F_lqp_Set_20	1.9934	0	0	863.487	17.3488	1.22377e-05	4
M_0.5_F_lqp_Set_21	1.75978	0	0.166667	887.631	41.4934	6.99463e-11	5
M_0.5_F_lqp_Set_22	2.00019	0	0.0416667	863.099	16.9611	1.48553e-05	5
M_0.5_F_lqp_Set_23	1.71711	0	0.0416667	862.947	16.8095	1.60256e-05	6
M_0.5_F_lqp_Set_24	1.98953	0	0.0416667	858.911	12.7726	0.000120615	5
M_0.5_F_lqp_Set_25	1.71804	0	0.0833333	862.779	16.6411	1.74334e-05	5
M_0.5_F_lqp_Set_26	2.00665	0	0	871.089	24.9507	2.73511e-07	5
M_0.5_F_lqp_Set_27	1.74172	0	0.125	880.332	34.1942	2.69002e-09	4
M_0.5_F_lqp_Set_28	1.88196	0	0.0416667	897.433	51.2953	5.20375e-13	4
M_0.5_F_lqp_Set_29	1.74585	0	0.0416667	867.289	21.1509	1.82844e-06	5
M_0.5_F_lqp_Set_3	1.97754	0	0	866.241	20.1027	3.08816e-06	4
M_0.5_F_lqp_Set_30	1.99379	0	0.0416667	869.006	22.868	7.74871e-07	5
M_0.5_F_lqp_Set_31	1.66927	0	0.0416667	878.857	32.7186	5.62577e-09	5
M_0.5_F_lqp_Set_32	1.80203	0	0.125	861.745	15.6073	2.92326e-05	6
M_0.5_F_lqp_Set_33	2.00192	0	0.0416667	861.343	15.2049	3.57475e-05	5
M_0.5_F_lqp_Set_34	1.74968	0	0.0416667	867.399	21.2605	1.73095e-06	3
M_0.5_F_lqp_Set_35	1.73138	0	0.0416667	864.927	18.7889	5.95651e-06	4
M_0.5_F_lqp_Set_36	1.9941	0	0	863.238	17.1001	1.38579e-05	7
M_0.5_F_lqp_Set_37	2.08274	0	0.0833333	870.749	24.6105	3.24218e-07	6
M_0.5_F_lqp_Set_38	2.00217	0	0.0416667	864.357	18.2191	7.91967e-06	6
M_0.5_F_lqp_Set_39	1.73071	0	0.0416667	866.618	20.4805	2.55663e-06	8
M_0.5_F_lqp_Set_4	1.69906	0	0.0833333	893.297	47.1593	4.11558e-12	4
M_0.5_F_lqp_Set_40	1.99734	0	0.0416667	863.782	17.6439	1.05588e-05	7
M_0.5_F_lqp_Set_41	1.66911	0	0.0833333	866.417	20.2794	2.82694e-06	7
M_0.5_F_lqp_Set_42	1.77519	0	0.0833333	858.282	12.1441	0.000165149	7
M_0.5_F_lqp_Set_43	2.01251	0	0.0416667	855.71	9.57208	0.000597574	7
M_0.5_F_lqp_Set_44	2.05395	0	0.125	861.76	15.6217	2.90224e-05	7
M_0.5_F_lqp_Set_45	1.71121	0	0.0416667	862.868	16.7304	1.66717e-05	6
M_0.5_F_lqp_Set_46	1.83154	0	0.0416667	858.606	12.4676	0.000140485	5
M_0.5_F_lqp_Set_47	2.01217	0	0.0416667	865.719	19.5813	4.00784e-06	7
M_0.5_F_lqp_Set_48	2.0738	0	0.0416667	864.847	18.7092	6.19849e-06	5
M_0.5_F_lqp_Set_49	1.71193	0	0.0416667	869.425	23.2873	6.28293e-07	6
M_0.5_F_lqp_Set_5	1.96663	0	0.0416667	873.339	27.2007	8.87922e-08	4
M_0.5_F_lqp_Set_50	1.80437	0	0.125	858.86	12.7222	0.000123697	5
M_0.5_F_lqp_Set_51	1.77005	0	0.0833333	859.879	13.7408	7.43287e-05	8
M_0.5_F_lqp_Set_52	2.0078	0	0.0416667	854.837	8.6994	0.000924468	7
M_0.5_F_lqp_Set_53	2.05317	0	0.0416667	860.023	13.8855	6.91439e-05	7
M_0.5_F_lqp_Set_54	1.69355	0	0.0416667	865.989	19.8515	3.5015e-06	8
M_0.5_F_lqp_Set_55	1.78874	0	0.0833333	858.325	12.1874	0.000161613	7
M_0.5_F_lqp_Set_56	1.80286	0	0.0416667	861.129	14.9914	3.9774e-05	6
M_0.5_F_lqp_Set_57	1.80245	0	0.0833333	862.712	16.5736	1.80316e-05	9
M_0.5_F_lqp_Set_6	2.11609	0	0.0416667	913.556	67.4181	1.64165e-16	3
M_0.5_F_lqp_Set_7	1.9736	0	0	878.8	32.6625	5.78594e-09	4
M_0.5_F_lqp_Set_8	1.99518	0	0.0833333	895.413	49.2746	1.42924e-12	4
M_0.5_F_lqp_Set_9	1.68251	0	0.0416667	914.873	68.7346	8.49992e-17	3
M_0.5_F_lqpt_Set_1	1.85134	0	0.166667	894.975	48.8366	1.7791e-12	21
M_0.5_F_lqpt_Set_10	1.88973	0	0.0833333	914.107	67.9685	1.2467e-16	14
M_0.5_F_lqpt_Set_11	2.06186	0	0.208333	904.244	58.106	1.72736e-14	16
M_0.5_F_lqpt_Set_12	1.90218	0	0.0416667	907.665	61.5275	3.12191e-15	14
M_0.5_F_lqpt_Set_13	1.93584	0	0.0833333	873.788	27.6499	7.09324e-08	17
M_0.5_F_lqpt_Set_14	1.97872	0	0.125	894.269	48.1312	2.53156e-12	19
M_0.5_F_lqpt_Set_15	1.71663	0	0.0416667	897.587	51.4489	4.81889e-13	18
M_0.5_F_lqpt_Set_16	2.68623	0	0.208333	904.681	58.5433	1.38814e-14	25
M_0.5_F_lqpt_Set_17	1.89597	0	0.125	917.339	71.2008	2.47676e-17	27
M_0.5_F_lqpt_Set_18	1.5094	0	0.166667	924.032	77.8938	8.72019e-19	27
M_0.5_F_lqpt_Set_19	1.95558	0	0.0833333	901.187	55.049	7.96532e-14	23
M_0.5_F_lqpt_Set_2	4.24173	0	0.291667	914.434	68.2958	1.05851e-16	18
M_0.5_F_lqpt_Set_20	2.77159	0	0.25	872.651	26.5131	1.25229e-07	19
M_0.5_F_lqpt_Set_21	2.03839	0	0.291667	924.708	78.5703	6.21745e-19	25
M_0.5_F_lqpt_Set_22	1.83378	0	0.208333	877.136	30.9985	1.32958e-08	20
M_0.5_F_lqpt_Set_23	1.7439	0	0.25	913.549	67.4107	1.64775e-16	27
M_0.5_F_lqpt_Set_24	1.90235	0	0.125	924.999	78.8613	5.37552e-19	27
M_0.5_F_lqpt_Set_25	1.63661	0	0.125	901.677	55.5392	6.23393e-14	25
M_0.5_F_lqpt_Set_26	1.99974	0	0.0416667	932.09	85.9521	1.55122e-20	27
M_0.5_F_lqpt_Set_27	2.00301	0	0.125	1057.03	210.897	1.14632e-47	34
M_0.5_F_lqpt_Set_28	1.97452	0	0.125	921.762	75.6241	2.71252e-18	21
M_0.5_F_lqpt_Set_29	2.00467	0	0.0416667	924.308	78.1697	7.59649e-19	26
M_0.5_F_lqpt_Set_3	1.8927	0	0.125	862.197	16.0592	2.33204e-05	15
M_0.5_F_lqpt_Set_30	1.99484	0	0.0416667	890.671	44.5331	1.53e-11	21
M_0.5_F_lqpt_Set_31	1.6221	0	0.0416667	970.635	124.497	6.61763e-29	29
M_0.5_F_lqpt_Set_32	1.77146	0	0.0833333	901.524	55.3864	6.72897e-14	24
M_0.5_F_lqpt_Set_33	1.95441	0	0.0833333	873.109	26.9714	9.95805e-08	18
M_0.5_F_lqpt_Set_34	1.71905	0	0.0416667	890.102	43.9635	2.03415e-11	20
M_0.5_F_lqpt_Set_35	1.96108	0	0.0833333	904.609	58.4708	1.43939e-14	23
M_0.5_F_lqpt_Set_36	2.25115	0	0.125	905.286	59.1477	1.02607e-14	27
M_0.5_F_lqpt_Set_37	1.98116	0	0.25	948.603	102.465	4.02635e-24	30
M_0.5_F_lqpt_Set_38	2.0377	0	0.166667	910.138	63.9996	9.07016e-16	26
M_0.5_F_lqpt_Set_39	1.78273	0	0.208333	995.413	149.275	2.7559e-34	33
M_0.5_F_lqpt_Set_4	1.70374	0	0.25	907.85	61.7121	2.84662e-15	21
M_0.5_F_lqpt_Set_40	2.04567	0	0.125	925.841	79.7032	3.52873e-19	28
M_0.5_F_lqpt_Set_41	1.92382	0	0.0833333	948.1	101.962	5.17754e-24	30
M_0.5_F_lqpt_Set_42	1.84825	0	0.25	928.776	82.6383	8.13311e-20	29
M_0.5_F_lqpt_Set_43	1.99327	0	0.125	880.491	34.3529	2.48481e-09	23
M_0.5_F_lqpt_Set_44	1.80502	0	0.125	949.686	103.548	2.34257e-24	30
M_0.5_F_lqpt_Set_45	1.99741	0	0.125	978.652	132.514	1.20168e-30	32
M_0.5_F_lqpt_Set_46	2.02012	0	0.0416667	958.219	112.081	3.28717e-26	30
M_0.5_F_lqpt_Set_47	1.99366	0	0.0416667	892.153	46.015	7.29314e-12	23
M_0.5_F_lqpt_Set_48	2.01507	0	0.0416667	932.192	86.0542	1.47406e-20	27
M_0.5_F_lqpt_Set_49	2.01082	0	0.0833333	983.445	137.307	1.09443e-31	31
M_0.5_F_lqpt_Set_5	1.83675	0	0.125	873.39	27.2518	8.65526e-08	16
M_0.5_F_lqpt_Set_50	1.7928	0	0.0833333	926.922	80.7844	2.05505e-19	27
M_0.5_F_lqpt_Set_51	1.79683	0	0.208333	966.62	120.481	4.92855e-28	32
M_0.5_F_lqpt_Set_52	2.02965	0	0.125	929.279	83.1412	6.32512e-20	29
M_0.5_F_lqpt_Set_53	1.64476	0	0.125	1070.63	224.487	1.28267e-50	36
M_0.5_F_lqpt_Set_54	2.0155	0	0.125	1069.71	223.575	2.02384e-50	36
M_0.5_F_lqpt_Set_55	2.03849	0	0.125	940.863	94.725	1.93051e-22	30
M_0.5_F_lqpt_Set_56	2.05158	0	0.0416667	1086.43	240.292	4.74543e-54	36
M_0.5_F_lqpt_Set_57	1.84123	0	0.125	984.391	138.253	6.81927e-32	33
M_0.5_F_lqpt_Set_6	2.03973	0	0.208333	912.586	66.4478	2.66678e-16	18
M_0.5_F_lqpt_Set_7	1.95163	0	0.0416667	885.372	39.2336	2.16503e-10	19
M_0.5_F_lqpt_Set_8	1.89882	0	0.0416667	964.398	118.26	1.49662e-27	27
M_0.5_F_lqpt_Set_9	1.77039	0	0.208333	912.908	66.77	2.26994e-16	15
M_0.5_F_lqpth_Set_1	1.99513	0	0.166667	1079.06	232.918	1.89388e-52	35
M_0.5_F_lqpth_Set_10	3.01012	0	0.0833333	913.269	67.1313	1.89482e-16	14
M_0.5_F_lqpth_Set_11	1.75094	0	0.208333	911.749	65.6106	4.05307e-16	18
M_0.5_F_lqpth_Set_12	2.02252	0	0.0833333	919.217	73.079	9.68348e-18	17
M_0.5_F_lqpth_Set_13	2.03589	0	0.0416667	897.068	50.9297	6.24754e-13	21
M_0.5_F_lqpth_Set_14	1.93479	0	0.0833333	918.793	72.6552	1.19693e-17	23
M_0.5_F_lqpth_Set_15	1.70094	0	0.0416667	935.941	89.8029	2.26196e-21	24
M_0.5_F_lqpth_Set_16	1.99881	0	0.208333	1031.19	185.054	4.68852e-42	34
M_0.5_F_lqpth_Set_17	1.81127	0	0.0833333	1117.89	271.747	7.0109e-61	37
M_0.5_F_lqpth_Set_18	1.97497	0	0.25	1166.17	320.032	2.29581e-71	38
M_0.5_F_lqpth_Set_19	1.94175	0	0.0833333	1040.93	194.796	3.59446e-44	34
M_0.5_F_lqpth_Set_2	3.1227	0	0.166667	920.295	74.1568	5.64925e-18	20
M_0.5_F_lqpth_Set_20	1.72262	0	0.125	918.916	72.7776	1.12588e-17	26
M_0.5_F_lqpth_Set_21	2.09719	0	0.25	1026.51	180.368	4.8816e-41	33
M_0.5_F_lqpth_Set_22	2.07709	0	0.0833333	924.072	77.9337	8.54791e-19	27
M_0.5_F_lqpth_Set_23	1.96097	0	0.166667	999.996	153.858	2.78645e-35	33
M_0.5_F_lqpth_Set_24	1.83911	0	0.0833333	931.335	85.1967	2.2632e-20	28
M_0.5_F_lqpth_Set_25	2.09927	0	0.0833333	1161.66	315.518	2.19364e-70	38
M_0.5_F_lqpth_Set_26	2.00235	0	0	955.547	109.409	1.25069e-25	29
M_0.5_F_lqpth_Set_27	2.07099	0	0.125	1244.99	398.855	1.7566e-88	39
M_0.5_F_lqpth_Set_28	1.839	0	0.0833333	992.266	146.128	1.32912e-33	29
M_0.5_F_lqpth_Set_29	2.07085	0	0.0416667	1022	175.858	4.65453e-40	33
M_0.5_F_lqpth_Set_3	1.63345	0	0.125	898.551	52.4129	2.97597e-13	22
M_0.5_F_lqpth_Set_30	1.86133	0	0.0416667	973.946	127.808	1.2642e-29	30
M_0.5_F_lqpth_Set_31	1.60793	0	0.0416667	1000.68	154.543	1.97854e-35	31
M_0.5_F_lqpth_Set_32	2.09036	0	0.0833333	908.572	62.4337	1.98447e-15	25
M_0.5_F_lqpth_Set_33	1.8406	0	0.0833333	886.252	40.1141	1.39406e-10	21
M_0.5_F_lqpth_Set_34	1.75098	0	0.0416667	945.768	99.6297	1.66199e-23	27
M_0.5_F_lqpth_Set_35	2.04887	0	0.0833333	929.788	83.6496	4.90531e-20	26
M_0.5_F_lqpth_Set_36	1.99923	0	0.0833333	1148.64	302.503	1.46981e-67	38
M_0.5_F_lqpth_Set_37	2.04749	0	0.208333	3033.6	2187.47	0	46
M_0.5_F_lqpth_Set_38	1.99675	0	0.125	1357.55	511.408	6.37038e-113	41
M_0.5_F_lqpth_Set_39	2.02653	0	0.25	1146.67	300.527	3.94698e-67	38
M_0.5_F_lqpth_Set_4	1.9645	0	0.291667	942.251	96.1131	9.644e-23	26
M_0.5_F_lqpth_Set_40	1.76513	0	0.125	1111.41	265.269	1.78903e-59	37
M_0.5_F_lqpth_Set_41	2.00939	0	0.125	3032.89	2186.75	0	46
M_0.5_F_lqpth_Set_42	2.11751	0	0.25	1068.14	222.005	4.43715e-50	36
M_0.5_F_lqpth_Set_43	1.88641	0	0.0833333	1112.76	266.617	9.11563e-60	37
M_0.5_F_lqpth_Set_44	2.13186	0	0.0833333	1108.65	262.508	7.11175e-59	37
M_0.5_F_lqpth_Set_45	2.04597	0	0.125	1074.25	228.108	2.09823e-51	36
M_0.5_F_lqpth_Set_46	2.10311	0	0.0833333	1056.7	210.56	1.35654e-47	35
M_0.5_F_lqpth_Set_47	1.86392	0	0.0833333	1013.56	167.42	3.16307e-38	33
M_0.5_F_lqpth_Set_48	2.01569	0	0.0416667	1177.09	330.948	9.78133e-74	38
M_0.5_F_lqpth_Set_49	2.0654	0	0.125	1174.94	328.805	2.85713e-73	38
M_0.5_F_lqpth_Set_5	1.98954	0	0.0833333	933.536	87.3976	7.52991e-21	26
M_0.5_F_lqpth_Set_50	2.08924	0	0.0833333	962.114	115.976	4.68936e-27	30
M_0.5_F_lqpth_Set_51	2.05254	0	0.208333	2233.27	1387.13	4.38968e-303	45
M_0.5_F_lqpth_Set_52	1.82389	0	0.125	1455.32	609.179	3.74424e-134	42
M_0.5_F_lqpth_Set_53	2.04852	0	0.125	NA	NA	NA	53
M_0.5_F_lqpth_Set_54	2.06188	0	0.125	5378.49	4532.35	0	47
M_0.5_F_lqpth_Set_55	2.10557	0	0.125	1144.33	298.193	1.2679e-66	38
M_0.5_F_lqpth_Set_56	2.09977	0	0.0833333	1213.79	367.656	1.04582e-81	39
M_0.5_F_lqpth_Set_57	2.06181	0	0.125	NA	NA	NA	52
M_0.5_F_lqpth_Set_6	2.026	0	0.208333	930.989	84.8511	2.69003e-20	21
M_0.5_F_lqpth_Set_7	1.84363	0	0.0416667	936.891	90.7527	1.40687e-21	26
M_0.5_F_lqpth_Set_8	1.81868	0	0.125	975.473	129.335	5.88984e-30	28
M_0.5_F_lqpth_Set_9	1.72429	0	0.208333	930.815	84.6765	2.9354e-20	19
M_0.5_F_lqph_Set_1	1.9582	0	0.0416667	946.983	100.845	9.05351e-24	25
M_0.5_F_lqph_Set_10	3.20666	0	0.0833333	912.532	66.3944	2.73894e-16	10
M_0.5_F_lqph_Set_11	1.71576	0	0.208333	916.026	69.8882	4.77427e-17	15
M_0.5_F_lqph_Set_12	2.00939	0	0.0833333	917.889	71.7507	1.8814e-17	13
M_0.5_F_lqph_Set_13	2.05108	0	0.0416667	898.402	52.2636	3.20656e-13	18
M_0.5_F_lqph_Set_14	2.02625	0	0.0833333	882.396	36.2575	9.5879e-10	14
M_0.5_F_lqph_Set_15	1.6976	0	0.0416667	920.806	74.6684	4.37424e-18	17
M_0.5_F_lqph_Set_16	1.99611	0	0.208333	959.489	113.351	1.742e-26	28
M_0.5_F_lqph_Set_17	1.96031	0	0.0416667	1059.74	213.599	2.96766e-48	34
M_0.5_F_lqph_Set_18	2.03561	0	0.0416667	1049.39	203.254	5.2354e-46	33
M_0.5_F_lqph_Set_19	1.98408	0	0.0416667	1047.14	201.006	1.61109e-45	33
M_0.5_F_lqph_Set_2	2.01417	0	0.0833333	891.321	45.1832	1.10545e-11	9
M_0.5_F_lqph_Set_20	1.99575	0	0.0416667	904.052	57.9136	1.90176e-14	21
M_0.5_F_lqph_Set_21	2.07608	0	0.208333	952.033	105.895	7.24723e-25	25
M_0.5_F_lqph_Set_22	2.06303	0	0.125	920.501	74.3628	5.09645e-18	24
M_0.5_F_lqph_Set_23	2.10149	0	0.0416667	914.646	68.5082	9.51871e-17	24
M_0.5_F_lqph_Set_24	1.87996	0	0.0416667	905.892	59.7541	7.577e-15	22
M_0.5_F_lqph_Set_25	2.09014	0	0.0416667	1017.62	171.486	4.1421e-39	32
M_0.5_F_lqph_Set_26	2.00017	0	0	935.886	89.7484	2.32452e-21	25
M_0.5_F_lqph_Set_27	2.06712	0	0.125	953.999	107.861	2.71208e-25	25
M_0.5_F_lqph_Set_28	1.90849	0	0.208333	951.446	105.308	9.71963e-25	22
M_0.5_F_lqph_Set_29	2.05769	0	0.0416667	1029.5	183.365	1.09094e-41	32
M_0.5_F_lqph_Set_3	1.97934	0	0.0416667	873.438	27.2999	8.44992e-08	13
M_0.5_F_lqph_Set_30	1.99836	0	0.0416667	940.466	94.3285	2.35384e-22	25
M_0.5_F_lqph_Set_31	2.00883	0	0.0416667	977.047	130.909	2.68181e-30	27
M_0.5_F_lqph_Set_32	2.11669	0	0.0833333	924.915	78.7765	5.60838e-19	24
M_0.5_F_lqph_Set_33	2.16642	0	0.0833333	887.723	41.5848	6.68212e-11	18
M_0.5_F_lqph_Set_34	1.74226	0	0.0833333	902.854	56.7156	3.4619e-14	18
M_0.5_F_lqph_Set_35	2.06286	0	0.0416667	915.245	69.1069	7.05609e-17	21
M_0.5_F_lqph_Set_36	1.98882	0	0.0416667	937.016	90.8777	1.32157e-21	27
M_0.5_F_lqph_Set_37	2.05062	0	0.125	1081.65	235.511	5.17956e-53	35
M_0.5_F_lqph_Set_38	1.99948	0	0.208333	1239.03	392.896	3.45706e-87	39
M_0.5_F_lqph_Set_39	2.10944	0	0.0833333	1009.2	163.058	2.80071e-37	32
M_0.5_F_lqph_Set_4	2.03346	0	0.166667	916.334	70.1957	4.09395e-17	18
M_0.5_F_lqph_Set_40	1.99456	0	0.0833333	950.677	104.539	1.42765e-24	28
M_0.5_F_lqph_Set_41	2.05762	0	0.0416667	1501.56	655.422	3.40325e-144	42
M_0.5_F_lqph_Set_42	2.19357	0	0.0833333	971.47	125.332	4.35989e-29	30
M_0.5_F_lqph_Set_43	1.83028	0	0.0833333	926.585	80.4473	2.43237e-19	26
M_0.5_F_lqph_Set_44	2.09647	0	0.125	1050.01	203.876	3.83537e-46	34
M_0.5_F_lqph_Set_45	2.10736	0	0.0416667	932.354	86.2155	1.3598e-20	26
M_0.5_F_lqph_Set_46	2.0905	0	0.0833333	1038.56	192.421	1.17821e-43	33
M_0.5_F_lqph_Set_47	2.05915	0	0.0416667	939.524	93.3864	3.77006e-22	26
M_0.5_F_lqph_Set_48	2.08138	0	0.0833333	1029.96	183.819	8.69207e-42	32
M_0.5_F_lqph_Set_49	2.05432	0	0.0416667	947.469	101.331	7.09748e-24	26
M_0.5_F_lqph_Set_5	1.98534	0	0.0416667	918.338	72.2003	1.50263e-17	21
M_0.5_F_lqph_Set_50	2.10751	0	0.0833333	896.34	50.2022	8.98837e-13	20
M_0.5_F_lqph_Set_51	2.13466	0	0.0833333	1098.26	252.124	1.27901e-56	36
M_0.5_F_lqph_Set_52	1.79159	0	0.0833333	1018.68	172.538	2.44833e-39	33
M_0.5_F_lqph_Set_53	2.03634	0	0.125	1295.63	449.489	1.77691e-99	40
M_0.5_F_lqph_Set_54	2.1152	0	0.0833333	1184.18	338.037	2.82539e-75	38
M_0.5_F_lqph_Set_55	2.16751	0	0.0833333	1023.55	177.411	2.1413e-40	33
M_0.5_F_lqph_Set_56	2.0881	0	0.0833333	970.159	124.021	8.39715e-29	29
M_0.5_F_lqph_Set_57	2.1355	0	0.0833333	1292.64	446.499	7.92497e-99	40
M_0.5_F_lqph_Set_6	2.04377	0	0.25	975.628	129.49	5.45178e-30	24
M_0.5_F_lqph_Set_7	1.97021	0	0.0416667	914.589	68.4512	9.79364e-17	21
M_0.5_F_lqph_Set_8	1.93014	0	0.0833333	969.391	123.253	1.23269e-28	25
M_0.5_F_lqph_Set_9	1.75007	0	0.0416667	987.665	141.527	1.32637e-32	24
M_0.75_F_lq_Set_1	1.95857	0	0.0416667	878.274	32.1358	7.52898e-09	4
M_0.75_F_lq_Set_10	2.08003	0	0.0833333	907.347	61.2092	3.66035e-15	3
M_0.75_F_lq_Set_11	1.78705	0	0.166667	893.899	47.7612	3.04598e-12	3
M_0.75_F_lq_Set_12	1.90396	0	0.0416667	897.285	51.1472	5.60351e-13	2
M_0.75_F_lq_Set_13	1.70316	0	0.0416667	861.429	15.2913	3.4235e-05	4
M_0.75_F_lq_Set_14	1.98409	0	0.0416667	862.545	16.4066	1.96018e-05	3
M_0.75_F_lq_Set_15	1.68699	0	0.0833333	888.118	41.9798	5.48455e-11	3
M_0.75_F_lq_Set_16	2.00082	0	0	867.706	21.5676	1.48455e-06	5
M_0.75_F_lq_Set_17	1.99134	0	0	861.457	15.3194	3.37586e-05	5
M_0.75_F_lq_Set_18	1.6799	0	0.0833333	878.8	32.6618	5.78805e-09	6
M_0.75_F_lq_Set_19	1.97843	0	0.0416667	871.416	25.2784	2.32172e-07	5
M_0.75_F_lq_Set_2	1.99987	0	0.166667	895.711	49.5728	1.23126e-12	3
M_0.75_F_lq_Set_20	1.99521	0	0	858.784	12.6458	0.000128512	4
M_0.75_F_lq_Set_21	1.74561	0	0.166667	882.89	36.7515	7.4894e-10	5
M_0.75_F_lq_Set_22	2.00571	0	0.0416667	859.362	13.2243	9.62309e-05	5
M_0.75_F_lq_Set_23	2.02732	0	0.0416667	858.012	11.8741	0.000189022	6
M_0.75_F_lq_Set_24	1.99178	0	0.0416667	854.802	8.66399	0.000940981	5
M_0.75_F_lq_Set_25	2.04278	0	0.0833333	860.786	14.6483	4.72166e-05	5
M_0.75_F_lq_Set_26	2.0062	0	0	867.597	21.4588	1.56753e-06	5
M_0.75_F_lq_Set_27	1.7378	0	0.125	879.874	33.7356	3.38334e-09	4
M_0.75_F_lq_Set_28	1.89526	0	0.0416667	901.378	55.2403	7.23889e-14	5
M_0.75_F_lq_Set_29	1.71998	0	0.0416667	863.945	17.8074	9.72981e-06	5
M_0.75_F_lq_Set_3	1.99455	0	0	861.611	15.4734	3.12555e-05	4
M_0.75_F_lq_Set_30	1.99407	0	0.0416667	863.692	17.5537	1.1046e-05	4
M_0.75_F_lq_Set_31	1.66956	0	0.0833333	888.449	42.3109	4.64779e-11	5
M_0.75_F_lq_Set_32	1.84104	0	0.125	855.65	9.51173	0.000615879	5
M_0.75_F_lq_Set_33	2.00356	0	0.0416667	859.851	13.7129	7.53734e-05	5
M_0.75_F_lq_Set_34	1.7736	0	0.0833333	875.597	29.4591	2.87066e-08	4
M_0.75_F_lq_Set_35	1.7094	0	0.0416667	861.43	15.2915	3.42314e-05	4
M_0.75_F_lq_Set_36	1.99754	0	0	855.878	9.74036	0.000549351	6
M_0.75_F_lq_Set_37	1.71161	0	0.0416667	865.439	19.301	4.61091e-06	6
M_0.75_F_lq_Set_38	2.00563	0	0.0416667	857.277	11.1391	0.000272974	5
M_0.75_F_lq_Set_39	2.0276	0	0.0416667	860.472	14.3343	5.52458e-05	7
M_0.75_F_lq_Set_4	1.62064	0	0.0833333	886.939	40.8006	9.89002e-11	3
M_0.75_F_lq_Set_40	1.99767	0	0.0416667	857.173	11.035	0.000287554	6
M_0.75_F_lq_Set_41	2.02689	0	0.0416667	862.171	16.0335	2.36223e-05	6
M_0.75_F_lq_Set_42	1.82611	0	0.0833333	853.105	6.96682	0.00219845	7
M_0.75_F_lq_Set_43	2.01341	0	0.0416667	849.225	3.08746	0.0152936	6
M_0.75_F_lq_Set_44	1.76917	0	0.125	853.525	7.38652	0.0017823	6
M_0.75_F_lq_Set_45	2.03916	0	0.0416667	858.018	11.8798	0.000188488	6
M_0.75_F_lq_Set_46	1.82385	0	0.0416667	855.142	9.00421	0.000793786	5
M_0.75_F_lq_Set_47	2.00446	0	0.0416667	858.818	12.6803	0.000126315	5
M_0.75_F_lq_Set_48	1.77283	0	0.0833333	871.108	24.9701	2.70871e-07	5
M_0.75_F_lq_Set_49	1.73291	0	0.0416667	863.944	17.8063	9.73517e-06	5
M_0.75_F_lq_Set_5	1.97864	0	0.0416667	870.29	24.1524	4.07671e-07	4
M_0.75_F_lq_Set_50	1.80841	0	0.125	855.493	9.35497	0.000666096	5
M_0.75_F_lq_Set_51	1.80733	0	0.0833333	851.964	5.82616	0.00388874	7
M_0.75_F_lq_Set_52	2.01466	0	0.0416667	849.128	2.99031	0.0160548	6
M_0.75_F_lq_Set_53	1.73658	0	0.0416667	854.227	8.0887	0.00125459	7
M_0.75_F_lq_Set_54	2.03933	0	0.0416667	860.516	14.3778	5.40556e-05	7
M_0.75_F_lq_Set_55	1.84914	0	0.0833333	852.959	6.8209	0.00236484	7
M_0.75_F_lq_Set_56	1.81886	0	0.0416667	855.378	9.24047	0.000705343	5
M_0.75_F_lq_Set_57	1.84387	0	0.0833333	851.757	5.6187	0.00431377	7
M_0.75_F_lq_Set_6	2.09115	0	0.0833333	911.988	65.8498	3.59615e-16	3
M_0.75_F_lq_Set_7	1.98154	0	0	874.964	28.8257	3.94023e-08	4
M_0.75_F_lq_Set_8	1.64016	0	0.0833333	895.076	48.9379	1.69127e-12	4
M_0.75_F_lq_Set_9	1.69015	0	0.0416667	913.749	67.6113	1.4905e-16	3
M_0.75_F_lp_Set_1	1.72078	0	0.0416667	909.177	63.039	1.46623e-15	3
M_0.75_F_lp_Set_10	18.0723	0	0.166667	946.909	100.771	9.39513e-24	3
M_0.75_F_lp_Set_11	3.99654	0	0.0833333	928.397	82.2592	9.83091e-20	2
M_0.75_F_lp_Set_12	1.97932	0	0.0416667	898.3	52.1618	3.37403e-13	2
M_0.75_F_lp_Set_13	1.73947	0	0.0416667	883.856	37.7183	4.61869e-10	3
M_0.75_F_lp_Set_14	1.76591	0	0.0416667	911.034	64.896	5.7937e-16	2
M_0.75_F_lp_Set_15	1.71455	0	0.0416667	911.414	65.2765	4.78999e-16	2
M_0.75_F_lp_Set_16	5.35557	0	0.0416667	890.656	44.5176	1.54197e-11	4
M_0.75_F_lp_Set_17	1.96069	0	0	883.289	37.1515	6.13196e-10	4
M_0.75_F_lp_Set_18	2.00061	0	0.0833333	893.436	47.2983	3.83924e-12	5
M_0.75_F_lp_Set_19	1.68782	0	0.0416667	914.756	68.618	9.00998e-17	5
M_0.75_F_lp_Set_2	2.4786	0	0.0416667	938.262	92.1242	7.08632e-22	2
M_0.75_F_lp_Set_20	1.98205	0	0	882.133	35.9948	1.09338e-09	4
M_0.75_F_lp_Set_21	2.00098	0	0.208333	891.152	45.0144	1.20276e-11	4
M_0.75_F_lp_Set_22	1.85839	0	0.0416667	900.153	54.0155	1.33546e-13	4
M_0.75_F_lp_Set_23	1.98203	0	0.0416667	872.352	26.2144	1.45398e-07	5
M_0.75_F_lp_Set_24	1.7112	0	0.0416667	874.723	28.5848	4.44463e-08	5
M_0.75_F_lp_Set_25	1.9824	0	0.0416667	879.837	33.6993	3.4453e-09	5
M_0.75_F_lp_Set_26	2.03822	0	0	899.94	53.8024	1.48557e-13	4
M_0.75_F_lp_Set_27	2.00194	0	0.166667	893.474	47.3356	3.76825e-12	4
M_0.75_F_lp_Set_28	1.84524	0	0.0416667	898.148	52.0099	3.64036e-13	3
M_0.75_F_lp_Set_29	1.72312	0	0.0416667	885.357	39.2192	2.18074e-10	5
M_0.75_F_lp_Set_3	1.96069	0	0	881.626	35.4882	1.40859e-09	3
M_0.75_F_lp_Set_30	1.70266	0	0.0416667	900.199	54.0614	1.30513e-13	4
M_0.75_F_lp_Set_31	1.7634	0	0.0416667	899.024	52.8857	2.34938e-13	4
M_0.75_F_lp_Set_32	1.84052	0	0.0416667	880.698	34.5595	2.24096e-09	5
M_0.75_F_lp_Set_33	1.92924	0	0.0416667	895.627	49.4891	1.28386e-12	3
M_0.75_F_lp_Set_34	1.86474	0	0.0416667	893.692	47.5538	3.37889e-12	3
M_0.75_F_lp_Set_35	1.69497	0	0.0416667	879.544	33.4057	3.99014e-09	4
M_0.75_F_lp_Set_36	1.98319	0	0	881.015	34.8774	1.91163e-09	6
M_0.75_F_lp_Set_37	2.00226	0	0.125	880.107	33.9689	3.01092e-09	6
M_0.75_F_lp_Set_38	1.83284	0	0.0416667	892.96	46.8221	4.87127e-12	4
M_0.75_F_lp_Set_39	1.99269	0	0.0416667	877.783	31.6453	9.62151e-09	7
M_0.75_F_lp_Set_4	1.99802	0	0.0416667	900.813	54.6747	9.60481e-14	3
M_0.75_F_lp_Set_40	1.83858	0	0.0416667	872.975	26.8368	1.06514e-07	5
M_0.75_F_lp_Set_41	1.98364	0	0.0416667	877.478	31.3401	1.12078e-08	4
M_0.75_F_lp_Set_42	1.99625	0	0.0416667	861.792	15.6543	2.85527e-05	5
M_0.75_F_lp_Set_43	1.95305	0	0	869.559	23.4208	5.87739e-07	6
M_0.75_F_lp_Set_44	2.00169	0	0.0416667	867.852	21.7142	1.37963e-06	5
M_0.75_F_lp_Set_45	1.99359	0	0.0416667	870.389	24.2515	3.87977e-07	5
M_0.75_F_lp_Set_46	2.00143	0	0.0833333	874.34	28.2018	5.38255e-08	6
M_0.75_F_lp_Set_47	1.91547	0	0.0416667	883.477	37.3386	5.58433e-10	5
M_0.75_F_lp_Set_48	2.00858	0	0.0416667	878.144	32.0056	8.03572e-09	5
M_0.75_F_lp_Set_49	1.75567	0	0.0416667	884.269	38.1315	3.75663e-10	6
M_0.75_F_lp_Set_5	1.64301	0	0.0416667	914.41	68.272	1.0712e-16	2
M_0.75_F_lp_Set_50	1.91149	0	0.0416667	876.72	30.5815	1.63774e-08	6
M_0.75_F_lp_Set_51	2.00208	0	0.0833333	869.789	23.6507	5.2391e-07	7
M_0.75_F_lp_Set_52	1.95793	0	0.0416667	870.535	24.3972	3.60712e-07	7
M_0.75_F_lp_Set_53	1.94701	0	0.0833333	869.362	23.2243	6.48417e-07	6
M_0.75_F_lp_Set_54	1.99043	0	0.0416667	872.822	26.6844	1.1495e-07	6
M_0.75_F_lp_Set_55	1.99956	0	0.0416667	867.065	20.927	2.045e-06	7
M_0.75_F_lp_Set_56	2.00833	0	0.0416667	875.502	29.3643	3.00993e-08	7
M_0.75_F_lp_Set_57	2.00052	0	0.0833333	867.381	21.2432	1.74599e-06	7
M_0.75_F_lp_Set_6	5.33986	0	0.0416667	924.87	78.7319	5.73502e-19	2
M_0.75_F_lp_Set_7	1.86808	0	0	904.841	58.7026	1.28184e-14	3
M_0.75_F_lp_Set_8	2.00064	0	0.0833333	909.942	63.8043	1.00002e-15	3
M_0.75_F_lp_Set_9	1.71654	0	0.0416667	914.374	68.2361	1.09062e-16	2
M_0.75_F_q_Set_1	1.6693	0	0.166667	937.11	90.972	1.26073e-21	1
M_0.75_F_q_Set_10	7.83279	0	0.166667	942.176	96.0383	1.00111e-22	2
M_0.75_F_q_Set_11	2.10007	0	0.125	894.102	47.9643	2.75187e-12	2
M_0.75_F_q_Set_12	1.90962	0	0.0416667	897.46	51.3223	5.13378e-13	2
M_0.75_F_q_Set_13	1.75298	0	0.0416667	881.322	35.1839	1.64e-09	2
M_0.75_F_q_Set_14	1.72014	0	0.0416667	907.104	60.9659	4.13389e-15	2
M_0.75_F_q_Set_15	1.70093	0	0.0416667	901.482	55.3438	6.87365e-14	2
M_0.75_F_q_Set_16	6.04148	0	0.0416667	934.787	88.6486	4.02842e-21	2
M_0.75_F_q_Set_17	1.95045	0	0	909.152	63.0141	1.4846e-15	2
M_0.75_F_q_Set_18	1.73769	0	0.0416667	892.773	46.6349	5.34928e-12	3
M_0.75_F_q_Set_19	1.72197	0	0.0416667	914.373	68.2349	1.09122e-16	3
M_0.75_F_q_Set_2	5.94694	0	0.0833333	942.52	96.3818	8.43122e-23	2
M_0.75_F_q_Set_20	2.05572	0	0	904.439	58.3005	1.56728e-14	3
M_0.75_F_q_Set_21	1.81921	0	0.208333	892.044	45.9062	7.70069e-12	3
M_0.75_F_q_Set_22	1.89768	0	0.0416667	895.545	49.4073	1.33745e-12	3
M_0.75_F_q_Set_23	1.70544	0	0.0416667	878.774	32.6356	5.86438e-09	3
M_0.75_F_q_Set_24	1.75037	0	0.0416667	904.212	58.0737	1.7555e-14	3
M_0.75_F_q_Set_25	1.76137	0	0.0833333	896.866	50.7283	6.9094e-13	3
M_0.75_F_q_Set_26	2.48875	0	0	924.314	78.1761	7.57204e-19	3
M_0.75_F_q_Set_27	2.11399	0	0.0833333	893.118	46.9799	4.50187e-12	3
M_0.75_F_q_Set_28	1.89619	0	0.0416667	897.213	51.0754	5.80844e-13	3
M_0.75_F_q_Set_29	1.71671	0	0.0416667	879.188	33.0501	4.76661e-09	3
M_0.75_F_q_Set_3	1.94478	0	0	909.152	63.0141	1.48457e-15	2
M_0.75_F_q_Set_30	1.72506	0	0.0416667	907.104	60.9659	4.13389e-15	2
M_0.75_F_q_Set_31	1.70603	0	0.0416667	901.482	55.3438	6.87365e-14	2
M_0.75_F_q_Set_32	1.8424	0	0.125	871.471	25.3332	2.25898e-07	3
M_0.75_F_q_Set_33	1.92112	0	0.0416667	890.974	44.8364	1.31473e-11	3
M_0.75_F_q_Set_34	1.77569	0	0.0416667	887.673	41.5353	6.84976e-11	3
M_0.75_F_q_Set_35	1.75323	0	0.0416667	883.511	37.3726	5.49028e-10	3
M_0.75_F_q_Set_36	2.04751	0	0	904.439	58.3005	1.5673e-14	3
M_0.75_F_q_Set_37	1.77012	0	0.0416667	880.18	34.0422	2.9025e-09	4
M_0.75_F_q_Set_38	1.90218	0	0.0416667	897.824	51.6858	4.28062e-13	4
M_0.75_F_q_Set_39	1.72982	0	0.0416667	880.491	34.3532	2.48445e-09	4
M_0.75_F_q_Set_4	1.67993	0	0.0833333	900.322	54.184	1.22754e-13	2
M_0.75_F_q_Set_40	1.78155	0	0.0416667	904.921	58.7826	1.23161e-14	4
M_0.75_F_q_Set_41	1.75818	0	0.0416667	894.945	48.8071	1.80559e-12	4
M_0.75_F_q_Set_42	1.81461	0	0.0833333	866.205	20.067	3.14376e-06	4
M_0.75_F_q_Set_43	1.93629	0	0.0416667	891.424	45.2865	1.0498e-11	4
M_0.75_F_q_Set_44	1.76932	0	0.0416667	883.908	37.7703	4.50025e-10	4
M_0.75_F_q_Set_45	1.71805	0	0.0416667	880.821	34.6827	2.1071e-09	4
M_0.75_F_q_Set_46	1.80323	0	0.0416667	865.46	19.3225	4.56168e-06	4
M_0.75_F_q_Set_47	1.92169	0	0.0416667	893.326	47.1883	4.05626e-12	4
M_0.75_F_q_Set_48	1.76638	0	0.0416667	887.673	41.5353	6.84976e-11	3
M_0.75_F_q_Set_49	1.70597	0	0.0416667	879.668	33.53	3.74971e-09	4
M_0.75_F_q_Set_5	1.73116	0	0.0416667	912.108	65.9699	3.3866e-16	2
M_0.75_F_q_Set_50	1.84225	0	0.125	872.337	26.1985	1.46559e-07	4
M_0.75_F_q_Set_51	1.84012	0	0.0416667	866.982	20.8444	2.13125e-06	5
M_0.75_F_q_Set_52	1.86892	0	0.0416667	891.758	45.62	8.88569e-12	5
M_0.75_F_q_Set_53	1.72623	0	0.0416667	881.761	35.6234	1.31652e-09	5
M_0.75_F_q_Set_54	1.73882	0	0.0416667	881.089	34.9505	1.84303e-09	5
M_0.75_F_q_Set_55	1.7809	0	0.0833333	866.205	20.067	3.14374e-06	4
M_0.75_F_q_Set_56	1.82487	0	0.0416667	866.702	20.5635	2.45263e-06	5
M_0.75_F_q_Set_57	1.82369	0	0.0416667	868.2	22.0619	1.15948e-06	6
M_0.75_F_q_Set_6	5.93745	0	0.0416667	934.787	88.6486	4.02843e-21	2
M_0.75_F_q_Set_7	1.9426	0	0	928.618	82.4803	8.80186e-20	2
M_0.75_F_q_Set_8	1.6931	0	0.0416667	904.925	58.7869	1.22896e-14	2
M_0.75_F_q_Set_9	1.98861	0	0.0416667	913.131	66.9926	2.03086e-16	2
M_0.75_F_qp_Set_1	1.6531	0	0.166667	937.195	91.0569	1.20835e-21	2
M_0.75_F_qp_Set_10	7.69499	0	0.125	934.448	88.3096	4.77253e-21	3
M_0.75_F_qp_Set_11	2.06191	0	0.166667	894.828	48.69	1.91441e-12	3
M_0.75_F_qp_Set_12	1.99066	0	0.0416667	900.101	53.9626	1.37125e-13	3
M_0.75_F_qp_Set_13	1.71931	0	0.0416667	881.441	35.303	1.54525e-09	2
M_0.75_F_qp_Set_14	1.75295	0	0.0416667	898.714	52.5758	2.74321e-13	3
M_0.75_F_qp_Set_15	1.67315	0	0.0833333	884.684	38.5459	3.05363e-10	3
M_0.75_F_qp_Set_16	3.38423	0	0.0416667	910.816	64.6776	6.46231e-16	4
M_0.75_F_qp_Set_17	1.94797	0	0	909.329	63.1914	1.35865e-15	2
M_0.75_F_qp_Set_18	2.01456	0	0.0833333	889.033	42.895	3.4707e-11	4
M_0.75_F_qp_Set_19	1.68469	0	0.0416667	909.643	63.5048	1.16159e-15	4
M_0.75_F_qp_Set_2	2.21585	0	0.0416667	941.529	95.3912	1.38355e-22	3
M_0.75_F_qp_Set_20	2.04996	0	0	891.984	45.8463	7.93496e-12	3
M_0.75_F_qp_Set_21	2.1166	0	0.166667	892.282	46.144	6.83742e-12	3
M_0.75_F_qp_Set_22	1.89596	0	0.0416667	888.104	41.9657	5.52347e-11	5
M_0.75_F_qp_Set_23	1.72528	0	0.0416667	881.318	35.1799	1.64333e-09	4
M_0.75_F_qp_Set_24	1.79316	0	0.0416667	891.131	44.9928	1.21585e-11	3
M_0.75_F_qp_Set_25	1.65427	0	0.0833333	886.073	39.9347	1.52489e-10	4
M_0.75_F_qp_Set_26	2.07629	0	0	892.481	46.3431	6.18953e-12	4
M_0.75_F_qp_Set_27	2.09345	0	0.125	885.907	39.7691	1.65646e-10	5
M_0.75_F_qp_Set_28	1.89983	0	0.0416667	898.143	52.0054	3.64853e-13	4
M_0.75_F_qp_Set_29	1.69685	0	0.0416667	880.615	34.4765	2.33593e-09	4
M_0.75_F_qp_Set_3	1.94797	0	0	909.329	63.1913	1.35867e-15	2
M_0.75_F_qp_Set_30	1.72684	0	0.0416667	898.426	52.2875	3.16846e-13	4
M_0.75_F_qp_Set_31	1.70985	0	0.0833333	884.018	37.8797	4.2606e-10	5
M_0.75_F_qp_Set_32	1.75626	0	0.125	869.523	23.3849	5.98373e-07	4
M_0.75_F_qp_Set_33	1.92706	0	0.0416667	885.234	39.0955	2.31982e-10	6
M_0.75_F_qp_Set_34	1.72708	0	0.0416667	867.86	21.7217	1.3745e-06	3
M_0.75_F_qp_Set_35	1.69577	0	0.0416667	883.629	37.491	5.1746e-10	3
M_0.75_F_qp_Set_36	2.05277	0	0	892.831	46.6934	5.19516e-12	5
M_0.75_F_qp_Set_37	2.09064	0	0.0833333	879.524	33.3861	4.02948e-09	6
M_0.75_F_qp_Set_38	1.90408	0	0.0416667	889.892	43.7537	2.25919e-11	6
M_0.75_F_qp_Set_39	1.71282	0	0.0416667	883.083	36.9447	6.79985e-10	6
M_0.75_F_qp_Set_4	1.96574	0	0.0833333	901.726	55.5881	6.08316e-14	3
M_0.75_F_qp_Set_40	1.9233	0	0.0416667	891.13	44.9924	1.21608e-11	3
M_0.75_F_qp_Set_41	1.68604	0	0.0833333	882.05	35.9115	1.13987e-09	5
M_0.75_F_qp_Set_42	1.78332	0	0.0833333	865.695	19.5565	4.05786e-06	5
M_0.75_F_qp_Set_43	1.91463	0	0.0416667	877.33	31.1917	1.20711e-08	6
M_0.75_F_qp_Set_44	2.05872	0	0.0833333	866.471	20.3328	2.75257e-06	5
M_0.75_F_qp_Set_45	1.71198	0	0.0833333	881.146	35.0078	1.79104e-09	4
M_0.75_F_qp_Set_46	1.76817	0	0.0416667	870.049	23.9105	4.60092e-07	6
M_0.75_F_qp_Set_47	1.92142	0	0.0416667	886.885	40.7472	1.01578e-10	7
M_0.75_F_qp_Set_48	1.77126	0	0.0416667	870.276	24.1383	4.10555e-07	6
M_0.75_F_qp_Set_49	1.73183	0	0.0416667	880.613	34.4748	2.33792e-09	4
M_0.75_F_qp_Set_5	1.65552	0	0.0416667	908.21	62.0723	2.37751e-15	3
M_0.75_F_qp_Set_50	1.73669	0	0.125	869.523	23.3846	5.98458e-07	4
M_0.75_F_qp_Set_51	1.76649	0	0.0833333	867.75	21.6119	1.45204e-06	6
M_0.75_F_qp_Set_52	1.91634	0	0.0416667	877.284	31.1464	1.23479e-08	6
M_0.75_F_qp_Set_53	2.05555	0	0.0416667	866.682	20.5443	2.47625e-06	6
M_0.75_F_qp_Set_54	1.69565	0	0.0833333	874.742	28.6035	4.40319e-08	4
M_0.75_F_qp_Set_55	1.78161	0	0.0833333	868.742	22.604	8.84203e-07	6
M_0.75_F_qp_Set_56	1.77603	0	0.0833333	870.05	23.9123	4.59678e-07	6
M_0.75_F_qp_Set_57	1.78751	0	0.0833333	870.196	24.0581	4.27358e-07	7
M_0.75_F_qp_Set_6	3.262	0	0.0416667	922.07	75.9317	2.32581e-18	3
M_0.75_F_qp_Set_7	1.87236	0	0	921.768	75.63	2.70458e-18	2
M_0.75_F_qp_Set_8	1.58202	0	0.0833333	897.814	51.6763	4.30105e-13	3
M_0.75_F_qp_Set_9	1.72387	0	0.0416667	913.508	67.3696	1.68199e-16	2
M_0.75_F_lqp_Set_1	1.91014	0	0.125	890.937	44.7992	1.33942e-11	4
M_0.75_F_lqp_Set_10	3.40328	0	0.0833333	917.091	70.9529	2.80363e-17	3
M_0.75_F_lqp_Set_11	2.07466	0	0.166667	894.222	48.084	2.59198e-12	3
M_0.75_F_lqp_Set_12	1.99035	0	0.0416667	900.009	53.8706	1.43581e-13	3
M_0.75_F_lqp_Set_13	1.73827	0	0.0416667	870.842	24.7044	3.09347e-07	4
M_0.75_F_lqp_Set_14	1.77145	0	0.0416667	872.494	26.356	1.35459e-07	3
M_0.75_F_lqp_Set_15	1.66722	0	0.0833333	882.232	36.0938	1.04058e-09	3
M_0.75_F_lqp_Set_16	2.09866	0	0.0416667	880.844	34.7056	2.08312e-09	5
M_0.75_F_lqp_Set_17	1.8365	0	0	872.444	26.3059	1.38893e-07	4
M_0.75_F_lqp_Set_18	1.68032	0	0.0833333	889.736	43.598	2.44202e-11	5
M_0.75_F_lqp_Set_19	1.96835	0	0.0416667	880.079	33.9413	3.05274e-09	4
M_0.75_F_lqp_Set_2	2.13364	0	0.0416667	908.8	62.6615	1.77079e-15	3
M_0.75_F_lqp_Set_20	1.94136	0	0	871.578	25.4398	2.14174e-07	4
M_0.75_F_lqp_Set_21	2.11611	0	0.166667	893.476	47.3381	3.76354e-12	4
M_0.75_F_lqp_Set_22	1.90511	0	0.0416667	870.401	24.2631	3.85719e-07	5
M_0.75_F_lqp_Set_23	1.72613	0	0.0416667	869.807	23.669	5.19133e-07	5
M_0.75_F_lqp_Set_24	1.84787	0	0.0416667	866.516	20.378	2.69099e-06	5
M_0.75_F_lqp_Set_25	1.61293	0	0.0833333	872.57	26.4319	1.30417e-07	5
M_0.75_F_lqp_Set_26	1.99858	0	0	881.171	35.0327	1.76885e-09	6
M_0.75_F_lqp_Set_27	1.71793	0	0.125	881.397	35.259	1.57961e-09	4
M_0.75_F_lqp_Set_28	1.89792	0	0.0416667	898.144	52.0055	3.64832e-13	4
M_0.75_F_lqp_Set_29	1.70615	0	0.0416667	873.69	27.5522	7.44834e-08	5
M_0.75_F_lqp_Set_3	1.80287	0	0	872.005	25.8672	1.72958e-07	3
M_0.75_F_lqp_Set_30	1.76377	0	0.0416667	876.185	30.047	2.13952e-08	5
M_0.75_F_lqp_Set_31	1.69348	0	0.0833333	883.128	36.9897	6.64851e-10	5
M_0.75_F_lqp_Set_32	1.7922	0	0.125	864.699	18.5611	6.67491e-06	5
M_0.75_F_lqp_Set_33	1.93744	0	0.0416667	866.837	20.6988	2.29227e-06	4
M_0.75_F_lqp_Set_34	1.75372	0	0.0416667	867.86	21.7216	1.37455e-06	3
M_0.75_F_lqp_Set_35	1.71652	0	0.0416667	870.845	24.7065	3.09022e-07	4
M_0.75_F_lqp_Set_36	1.97489	0	0	873.879	27.7409	6.77786e-08	7
M_0.75_F_lqp_Set_37	1.73265	0	0.0833333	874.793	28.655	4.2912e-08	5
M_0.75_F_lqp_Set_38	1.92063	0	0.0416667	872.718	26.5799	1.21113e-07	6
M_0.75_F_lqp_Set_39	1.6878	0	0.0416667	871.817	25.6789	1.9004e-07	6
M_0.75_F_lqp_Set_4	1.97312	0	0.0833333	901.263	55.1246	7.66968e-14	4
M_0.75_F_lqp_Set_40	1.86204	0	0.0416667	868.67	22.5322	9.16528e-07	6
M_0.75_F_lqp_Set_41	1.70229	0	0.0833333	876.789	30.6506	1.58212e-08	7
M_0.75_F_lqp_Set_42	2.05192	0	0.0833333	868.008	21.8704	1.276e-06	7
M_0.75_F_lqp_Set_43	1.93192	0	0.0416667	863.606	17.4681	1.15293e-05	7
M_0.75_F_lqp_Set_44	2.05692	0	0.0833333	863.718	17.5799	1.09025e-05	5
M_0.75_F_lqp_Set_45	1.71633	0	0.0416667	869.556	23.4185	5.88418e-07	5
M_0.75_F_lqp_Set_46	1.77397	0	0.0416667	864.08	17.9419	9.09718e-06	5
M_0.75_F_lqp_Set_47	1.93693	0	0.0416667	872.899	26.7612	1.10615e-07	7
M_0.75_F_lqp_Set_48	1.75234	0	0.0416667	866.684	20.546	2.47424e-06	5
M_0.75_F_lqp_Set_49	1.68751	0	0.0416667	873.713	27.5751	7.36341e-08	5
M_0.75_F_lqp_Set_5	1.96857	0	0.0416667	878.125	31.9874	8.10919e-09	3
M_0.75_F_lqp_Set_50	1.76759	0	0.125	864.403	18.2654	7.73856e-06	5
M_0.75_F_lqp_Set_51	2.05148	0	0.0833333	867.319	21.1813	1.80083e-06	7
M_0.75_F_lqp_Set_52	1.92304	0	0.0416667	866.355	20.2171	2.91639e-06	8
M_0.75_F_lqp_Set_53	2.05282	0	0.0416667	868.348	22.2099	1.07676e-06	7
M_0.75_F_lqp_Set_54	1.723	0	0.0416667	875.875	29.7373	2.49784e-08	8
M_0.75_F_lqp_Set_55	2.0532	0	0.0833333	867.889	21.7509	1.35452e-06	7
M_0.75_F_lqp_Set_56	1.77664	0	0.0416667	864.162	18.0238	8.73213e-06	5
M_0.75_F_lqp_Set_57	2.04948	0	0.0833333	866.927	20.7893	2.19083e-06	7
M_0.75_F_lqp_Set_6	4.93058	0	0.0416667	917.203	71.0652	2.65049e-17	3
M_0.75_F_lqp_Set_7	1.90362	0	0	886.151	40.0127	1.46653e-10	4
M_0.75_F_lqp_Set_8	1.62872	0	0.0833333	896.222	50.084	9.53552e-13	4
M_0.75_F_lqp_Set_9	1.7038	0	0.0416667	915.301	69.1626	6.86251e-17	3
M_0.75_F_lqpt_Set_1	1.75944	0	0.208333	869.945	23.8074	4.84437e-07	12
M_0.75_F_lqpt_Set_10	1.44596	0	0.0833333	907.714	61.5758	3.04743e-15	9
M_0.75_F_lqpt_Set_11	2.08471	0	0.208333	888.936	42.7981	3.64298e-11	9
M_0.75_F_lqpt_Set_12	1.99146	0	0.0416667	906.444	60.3063	5.74903e-15	10
M_0.75_F_lqpt_Set_13	1.88817	0	0.0416667	867.341	21.2029	1.78152e-06	13
M_0.75_F_lqpt_Set_14	1.98909	0	0.0833333	864.969	18.8305	5.83366e-06	10
M_0.75_F_lqpt_Set_15	1.67913	0	0.0416667	877.745	31.6066	9.80949e-09	9
M_0.75_F_lqpt_Set_16	2.01647	0	0.208333	875.737	29.599	2.6767e-08	17
M_0.75_F_lqpt_Set_17	1.90083	0	0.125	861.202	15.0641	3.83544e-05	16
M_0.75_F_lqpt_Set_18	1.67834	0	0.208333	882.691	36.5534	8.26938e-10	17
M_0.75_F_lqpt_Set_19	1.76503	0	0.0833333	867.112	20.9741	1.99741e-06	13
M_0.75_F_lqpt_Set_2	2.87586	0	0.291667	888.677	42.5392	4.14645e-11	9
M_0.75_F_lqpt_Set_20	1.96483	0	0.166667	863.296	17.1579	1.34635e-05	14
M_0.75_F_lqpt_Set_21	1.66789	0	0.25	894.019	47.881	2.86897e-12	17
M_0.75_F_lqpt_Set_22	1.85485	0	0.208333	862.059	15.9209	2.49892e-05	14
M_0.75_F_lqpt_Set_23	1.97979	0	0.166667	867.532	21.3942	1.61903e-06	18
M_0.75_F_lqpt_Set_24	2.02227	0	0.125	862.011	15.8729	2.55972e-05	15
M_0.75_F_lqpt_Set_25	1.67717	0	0.0833333	871.79	25.6524	1.92577e-07	17
M_0.75_F_lqpt_Set_26	1.99987	0	0.0416667	871.255	25.1172	2.51654e-07	16
M_0.75_F_lqpt_Set_27	2.027	0	0.125	929.126	82.9884	6.82732e-20	22
M_0.75_F_lqpt_Set_28	2.00172	0	0.125	898.954	52.8164	2.43227e-13	13
M_0.75_F_lqpt_Set_29	1.93378	0	0.0416667	868.362	22.2238	1.06932e-06	15
M_0.75_F_lqpt_Set_3	1.94969	0	0.125	858.848	12.7099	0.000124459	11
M_0.75_F_lqpt_Set_30	1.92222	0	0.0416667	868.573	22.4346	9.62351e-07	14
M_0.75_F_lqpt_Set_31	1.68111	0	0.0416667	881.634	35.4957	1.40326e-09	13
M_0.75_F_lqpt_Set_32	2.00864	0	0.0416667	864.811	18.6728	6.3124e-06	15
M_0.75_F_lqpt_Set_33	1.97911	0	0.125	859.752	13.614	7.91936e-05	13
M_0.75_F_lqpt_Set_34	1.7203	0	0.0416667	865.265	19.1269	5.03018e-06	11
M_0.75_F_lqpt_Set_35	1.91162	0	0.0416667	873.641	27.5033	7.63257e-08	15
M_0.75_F_lqpt_Set_36	2.00437	0	0.125	862.944	16.8056	1.60565e-05	18
M_0.75_F_lqpt_Set_37	2.00491	0	0.208333	901.886	55.7484	5.61485e-14	22
M_0.75_F_lqpt_Set_38	1.83908	0	0.208333	856.467	10.3286	0.000409373	14
M_0.75_F_lqpt_Set_39	1.98421	0	0.166667	867.998	21.8599	1.28269e-06	19
M_0.75_F_lqpt_Set_4	1.65207	0	0.25	888.182	42.0438	5.31182e-11	13
M_0.75_F_lqpt_Set_40	1.91651	0	0.125	872.579	26.4406	1.29849e-07	19
M_0.75_F_lqpt_Set_41	1.61159	0	0.0833333	877.514	31.3763	1.10068e-08	19
M_0.75_F_lqpt_Set_42	2.03082	0	0.291667	854.65	8.51204	0.00101526	17
M_0.75_F_lqpt_Set_43	2.03609	0	0.125	852.414	6.27603	0.00310542	15
M_0.75_F_lqpt_Set_44	1.80176	0	0.208333	864.338	18.2003	7.99472e-06	17
M_0.75_F_lqpt_Set_45	1.99899	0	0.125	877.01	30.8723	1.41615e-08	20
M_0.75_F_lqpt_Set_46	2.0159	0	0.0416667	874.306	28.1684	5.47321e-08	18
M_0.75_F_lqpt_Set_47	2.00548	0	0.0416667	872.733	26.5952	1.20188e-07	17
M_0.75_F_lqpt_Set_48	2.02468	0	0.0416667	870.925	24.7866	2.96889e-07	14
M_0.75_F_lqpt_Set_49	1.90756	0	0.0416667	871.754	25.6164	1.96071e-07	16
M_0.75_F_lqpt_Set_5	1.81009	0	0.125	865.745	19.6072	3.9563e-06	11
M_0.75_F_lqpt_Set_50	2.02815	0	0.0416667	846.815	0.676488	0.0510558	11
M_0.75_F_lqpt_Set_51	2.02081	0	0.208333	861.88	15.7422	2.73261e-05	19
M_0.75_F_lqpt_Set_52	2.04137	0	0.125	859.69	13.5518	8.16964e-05	18
M_0.75_F_lqpt_Set_53	2.01365	0	0.125	876.524	30.3855	1.80641e-08	20
M_0.75_F_lqpt_Set_54	2.00126	0	0.125	872.929	26.7905	1.09008e-07	20
M_0.75_F_lqpt_Set_55	2.03968	0	0.125	853.55	7.412	0.00175973	17
M_0.75_F_lqpt_Set_56	2.01897	0	0.0416667	864.877	18.7393	6.10605e-06	16
M_0.75_F_lqpt_Set_57	2.03866	0	0.125	866.908	20.7705	2.21151e-06	20
M_0.75_F_lqpt_Set_6	2.05917	0	0.25	908.364	62.2265	2.2011e-15	13
M_0.75_F_lqpt_Set_7	1.71998	0	0.0416667	867.834	21.6957	1.39245e-06	13
M_0.75_F_lqpt_Set_8	1.66468	0	0.0833333	894.699	48.5614	2.04157e-12	13
M_0.75_F_lqpt_Set_9	1.71592	0	0.0416667	903.715	57.5771	2.25021e-14	9
M_0.75_F_lqpth_Set_1	1.96345	0	0.125	937.904	91.7658	8.47707e-22	24
M_0.75_F_lqpth_Set_10	2.78598	0	0.0833333	914.708	68.57	9.22925e-17	12
M_0.75_F_lqpth_Set_11	1.77232	0	0.208333	896.028	49.8903	1.05054e-12	11
M_0.75_F_lqpth_Set_12	1.91781	0	0.0833333	912.256	66.1184	3.14418e-16	12
M_0.75_F_lqpth_Set_13	1.98782	0	0.0416667	890.936	44.7975	1.34053e-11	18
M_0.75_F_lqpth_Set_14	1.84934	0	0.0833333	890.156	44.0177	1.97975e-11	17
M_0.75_F_lqpth_Set_15	1.6767	0	0.0416667	901.23	55.0918	7.79672e-14	15
M_0.75_F_lqpth_Set_16	2.00143	0	0.25	957.515	111.377	4.67502e-26	28
M_0.75_F_lqpth_Set_17	1.81498	0	0.0416667	995.363	149.225	2.82613e-34	31
M_0.75_F_lqpth_Set_18	1.9931	0	0.0833333	977.841	131.703	1.80287e-30	29
M_0.75_F_lqpth_Set_19	1.9933	0	0.0833333	969.579	123.441	1.1222e-28	28
M_0.75_F_lqpth_Set_2	2.00155	0	0.125	901.2	55.0617	7.91498e-14	12
M_0.75_F_lqpth_Set_20	1.87521	0	0.0833333	883.866	37.7283	4.59565e-10	18
M_0.75_F_lqpth_Set_21	2.02575	0	0.25	977.7	131.562	1.93517e-30	28
M_0.75_F_lqpth_Set_22	2.03039	0	0.0833333	903.271	57.1334	2.8092e-14	22
M_0.75_F_lqpth_Set_23	2.00242	0	0.0416667	917.295	71.1569	2.53179e-17	25
M_0.75_F_lqpth_Set_24	1.82156	0	0.0416667	953.533	107.395	3.4224e-25	28
M_0.75_F_lqpth_Set_25	2.03047	0	0.0416667	981.813	135.675	2.47502e-31	30
M_0.75_F_lqpth_Set_26	1.98398	0	0	911.419	65.2812	4.77874e-16	23
M_0.75_F_lqpth_Set_27	2.00974	0	0.166667	908.287	62.1488	2.28822e-15	19
M_0.75_F_lqpth_Set_28	2.01361	0	0.125	911.317	65.1788	5.02981e-16	16
M_0.75_F_lqpth_Set_29	2.00578	0	0.0416667	931.043	84.9045	2.61917e-20	25
M_0.75_F_lqpth_Set_3	1.86842	0	0.125	892.551	46.4134	5.97599e-12	18
M_0.75_F_lqpth_Set_30	1.84754	0	0.0416667	925.648	79.5103	3.8859e-19	24
M_0.75_F_lqpth_Set_31	1.99723	0	0.0416667	913.195	67.057	1.96652e-16	20
M_0.75_F_lqpth_Set_32	2.02719	0	0.0833333	883.315	37.1771	6.0539e-10	19
M_0.75_F_lqpth_Set_33	1.79861	0	0.0833333	886.192	40.0545	1.43623e-10	19
M_0.75_F_lqpth_Set_34	1.75068	0	0.0416667	882.281	36.1431	1.01522e-09	15
M_0.75_F_lqpth_Set_35	2.00592	0	0.0416667	893.362	47.2237	3.98509e-12	19
M_0.75_F_lqpth_Set_36	1.85778	0	0.0416667	954.529	108.391	2.07987e-25	29
M_0.75_F_lqpth_Set_37	2.00352	0	0.208333	979.282	133.144	8.77192e-31	30
M_0.75_F_lqpth_Set_38	2.03768	0	0.208333	942.24	96.1021	9.69722e-23	27
M_0.75_F_lqpth_Set_39	1.99795	0	0.0416667	956.209	110.071	8.98187e-26	29
M_0.75_F_lqpth_Set_4	1.99611	0	0.166667	928.247	82.1085	1.05998e-19	21
M_0.75_F_lqpth_Set_40	1.83007	0	0.0416667	1104.71	258.569	5.09762e-58	36
M_0.75_F_lqpth_Set_41	2.01068	0	0.0833333	1011.41	165.27	9.26651e-38	32
M_0.75_F_lqpth_Set_42	2.0214	0	0.0833333	964.101	117.963	1.73609e-27	30
M_0.75_F_lqpth_Set_43	1.83939	0	0.0833333	932.443	86.305	1.30029e-20	27
M_0.75_F_lqpth_Set_44	2.02581	0	0.0833333	947.572	101.434	6.74159e-24	28
M_0.75_F_lqpth_Set_45	2.00586	0	0.0416667	958.553	112.415	2.78248e-26	29
M_0.75_F_lqpth_Set_46	2.01697	0	0.0416667	930.022	83.8836	4.36356e-20	26
M_0.75_F_lqpth_Set_47	1.89282	0	0.0416667	953.475	107.337	3.52429e-25	28
M_0.75_F_lqpth_Set_48	2.00828	0	0.0416667	944.561	98.4226	3.03914e-23	26
M_0.75_F_lqpth_Set_49	2.00802	0	0.0416667	905.973	59.8352	7.276e-15	22
M_0.75_F_lqpth_Set_5	1.98241	0	0.0416667	900.452	54.3137	1.15046e-13	19
M_0.75_F_lqpth_Set_50	2.04114	0	0.0833333	875.955	29.8169	2.40041e-08	18
M_0.75_F_lqpth_Set_51	2.01096	0	0.0833333	1062.48	216.339	7.54393e-49	35
M_0.75_F_lqpth_Set_52	1.80996	0	0.0833333	1065.04	218.901	2.09539e-49	35
M_0.75_F_lqpth_Set_53	2.01222	0	0.0833333	957.618	111.48	4.44001e-26	29
M_0.75_F_lqpth_Set_54	2.02057	0	0.0416667	1070.02	223.879	1.73889e-50	35
M_0.75_F_lqpth_Set_55	2.03716	0	0.0833333	949.737	103.599	2.28425e-24	29
M_0.75_F_lqpth_Set_56	2.0166	0	0.0416667	950.988	104.85	1.22186e-24	28
M_0.75_F_lqpth_Set_57	2.03023	0	0.0833333	948.196	102.058	4.93531e-24	29
M_0.75_F_lqpth_Set_6	2.01899	0	0.25	926.965	80.8267	2.01206e-19	17
M_0.75_F_lqpth_Set_7	1.84294	0	0.0416667	903.093	56.955	3.07128e-14	20
M_0.75_F_lqpth_Set_8	1.91971	0	0.0833333	906.966	60.8277	4.4297e-15	16
M_0.75_F_lqpth_Set_9	1.71949	0	0.0416667	926.519	80.3811	2.51426e-19	15
M_0.75_F_lqph_Set_1	1.96927	0	0.0833333	927.893	81.7547	1.26511e-19	22
M_0.75_F_lqph_Set_10	2.65855	0	0.0833333	907.507	61.3691	3.37922e-15	8
M_0.75_F_lqph_Set_11	1.77341	0	0.208333	897.323	51.1852	5.49823e-13	8
M_0.75_F_lqph_Set_12	1.98411	0	0.0833333	915.277	69.1391	6.94364e-17	11
M_0.75_F_lqph_Set_13	2.01058	0	0.0416667	874.45	28.3116	5.09519e-08	12
M_0.75_F_lqph_Set_14	1.96076	0	0.0833333	876.693	30.5546	1.65995e-08	12
M_0.75_F_lqph_Set_15	1.69901	0	0.0416667	901.776	55.638	5.93333e-14	12
M_0.75_F_lqph_Set_16	2.00151	0	0.208333	919.229	73.0905	9.62796e-18	23
M_0.75_F_lqph_Set_17	1.99031	0	0.0416667	935.327	89.1893	3.07424e-21	25
M_0.75_F_lqph_Set_18	2.00488	0	0.0833333	939.308	93.1701	4.2005e-22	24
M_0.75_F_lqph_Set_19	1.95489	0	0.0416667	955.374	109.236	1.36363e-25	26
M_0.75_F_lqph_Set_2	2.00092	0	0.0833333	896.192	50.0542	9.6784e-13	10
M_0.75_F_lqph_Set_20	1.99773	0	0.0416667	879.066	32.9275	5.06782e-09	15
M_0.75_F_lqph_Set_21	2.02537	0	0.208333	905.039	58.9013	1.16059e-14	17
M_0.75_F_lqph_Set_22	2.02157	0	0.166667	913.253	67.1146	1.91069e-16	22
M_0.75_F_lqph_Set_23	2.04863	0	0.0416667	899.602	53.4635	1.75991e-13	21
M_0.75_F_lqph_Set_24	1.97848	0	0.0416667	932.976	86.8379	9.96156e-21	25
M_0.75_F_lqph_Set_25	2.01728	0	0.0416667	906.498	60.3605	5.59544e-15	21
M_0.75_F_lqph_Set_26	1.99579	0	0	888.49	42.3517	4.55387e-11	17
M_0.75_F_lqph_Set_27	2.01622	0	0.166667	921.72	75.5822	2.76995e-18	20
M_0.75_F_lqph_Set_28	2.01439	0	0.208333	910.334	64.1962	8.22084e-16	13
M_0.75_F_lqph_Set_29	1.992	0	0.0416667	893.548	47.4103	3.63013e-12	17
M_0.75_F_lqph_Set_3	1.93815	0	0.0416667	884.063	37.9249	4.16547e-10	15
M_0.75_F_lqph_Set_30	1.9809	0	0.0416667	916.124	69.9859	4.54682e-17	21
M_0.75_F_lqph_Set_31	1.99086	0	0.0416667	947.876	101.738	5.79074e-24	23
M_0.75_F_lqph_Set_32	2.02282	0	0.0833333	908.634	62.4956	1.92397e-15	21
M_0.75_F_lqph_Set_33	2.05028	0	0.0833333	887.817	41.6787	6.37572e-11	17
M_0.75_F_lqph_Set_34	1.76362	0	0.0833333	894.168	48.0297	2.66332e-12	15
M_0.75_F_lqph_Set_35	2.00049	0	0.0416667	886.118	39.9801	1.49065e-10	15
M_0.75_F_lqph_Set_36	1.98961	0	0.0416667	982.704	136.566	1.5848e-31	30
M_0.75_F_lqph_Set_37	2.00708	0	0.208333	963.373	117.235	2.49902e-27	28
M_0.75_F_lqph_Set_38	2.03451	0	0.208333	942.075	95.937	1.05315e-22	26
M_0.75_F_lqph_Set_39	2.03904	0	0.0416667	912.317	66.1791	3.05017e-16	23
M_0.75_F_lqph_Set_4	2.00314	0	0.125	907.638	61.4996	3.16568e-15	15
M_0.75_F_lqph_Set_40	1.98622	0	0.0416667	970.574	124.436	6.82342e-29	29
M_0.75_F_lqph_Set_41	2.00901	0	0.0416667	964.368	118.23	1.51943e-27	28
M_0.75_F_lqph_Set_42	2.04477	0	0.0833333	994.878	148.74	3.60137e-34	31
M_0.75_F_lqph_Set_43	1.84549	0	0.0833333	901.757	55.619	5.98991e-14	22
M_0.75_F_lqph_Set_44	2.01854	0	0.208333	938.122	91.9843	7.59969e-22	26
M_0.75_F_lqph_Set_45	2.0501	0	0.0416667	882.453	36.3148	9.31718e-10	18
M_0.75_F_lqph_Set_46	2.01685	0	0.0416667	937.155	91.0166	1.23296e-21	25
M_0.75_F_lqph_Set_47	2.0172	0	0	891.519	45.3811	1.00129e-11	18
M_0.75_F_lqph_Set_48	2.00772	0	0.0833333	968.803	122.665	1.65386e-28	27
M_0.75_F_lqph_Set_49	1.99814	0	0.0416667	914.613	68.4746	9.68003e-17	21
M_0.75_F_lqph_Set_5	1.97178	0	0.0416667	903.348	57.21	2.70359e-14	18
M_0.75_F_lqph_Set_50	2.02729	0	0.0833333	881.389	35.2509	1.58603e-09	16
M_0.75_F_lqph_Set_51	2.01207	0	0.0416667	1052.76	206.621	9.72311e-47	34
M_0.75_F_lqph_Set_52	1.80439	0	0.0833333	994.3	148.162	4.8076e-34	31
M_0.75_F_lqph_Set_53	2.00783	0	0.208333	997.939	151.801	7.79505e-35	31
M_0.75_F_lqph_Set_54	2.04434	0	0.0416667	970.569	124.431	6.84025e-29	29
M_0.75_F_lqph_Set_55	2.03905	0	0.0833333	954.01	107.872	2.69728e-25	28
M_0.75_F_lqph_Set_56	2.01784	0	0.0416667	900.643	54.5046	1.04575e-13	20
M_0.75_F_lqph_Set_57	2.02919	0	0.0416667	1011	164.867	1.13404e-37	32
M_0.75_F_lqph_Set_6	2.01925	0	0.25	924.478	78.3397	6.9775e-19	14
M_0.75_F_lqph_Set_7	1.94122	0	0.0416667	879.544	33.4055	3.99047e-09	13
M_0.75_F_lqph_Set_8	1.9376	0	0.0833333	915.906	69.7683	5.06932e-17	16
M_0.75_F_lqph_Set_9	1.72402	0	0.0416667	933.705	87.5671	6.91821e-21	14
M_1_F_lq_Set_1	1.95981	0	0.0416667	881.773	35.6354	1.3086e-09	4
M_1_F_lq_Set_10	2.20843	0	0.125	908.054	61.9161	2.57059e-15	2
M_1_F_lq_Set_11	1.79544	0	0.166667	893.986	47.8477	2.9171e-12	3
M_1_F_lq_Set_12	1.94048	0	0.0416667	897.318	51.1804	5.51126e-13	2
M_1_F_lq_Set_13	1.72547	0	0.0416667	864.255	18.1172	8.33365e-06	4
M_1_F_lq_Set_14	1.97855	0	0.0416667	865.501	19.3629	4.47025e-06	3
M_1_F_lq_Set_15	1.72426	0	0.0833333	888.256	42.1175	5.11963e-11	3
M_1_F_lq_Set_16	2.00283	0	0	871.279	25.1408	2.48705e-07	5
M_1_F_lq_Set_17	1.97438	0	0	865.456	19.318	4.57188e-06	5
M_1_F_lq_Set_18	1.69282	0	0.0833333	882.483	36.3446	9.17928e-10	6
M_1_F_lq_Set_19	1.96658	0	0.0416667	872.476	26.3377	1.36704e-07	4
M_1_F_lq_Set_2	2.12729	0	0.125	899.553	53.4145	1.80354e-13	3
M_1_F_lq_Set_20	1.99302	0	0	862.59	16.4516	1.91656e-05	4
M_1_F_lq_Set_21	1.66948	0	0.166667	886.695	40.5571	1.11706e-10	5
[truncated: 2,722 more rows]

## Sheet: 50km-RawVariables_2
Model	Mean_AUC_ratio	pval_pROC	Omission_rate_at_5%	AICc	delta_AICc	W_AICc	N_parameters
[truncated: 4,560 more rows]

[truncated: 13 more sheets: 50km-RawVariables_3, 50km-RawVariables_4, 50km-RawVariables_5, CountryThinning-PC_1, CountryThinning-PC_2, CountryThinning-PC_3, CountryThinning-PC_4, CountryThinning-PC_5, CountryThinning-RawVariables_1, CountryThinning-RawVariables_2, CountryThinning-RawVariables_3, CountryThinning-RawVariables_4, CountryThinning-RawVariables_5]
